# Supplementary material
Source: PubMed Central journal article supplement (PMC4528744)
Supplement: supp_pp.15.00364_00364revSupplemental_Materials_smaller_file_size3.pdf [file supp_pp.15.00364_00364revSupplemental_Materials_smaller_file_size3.pdf]

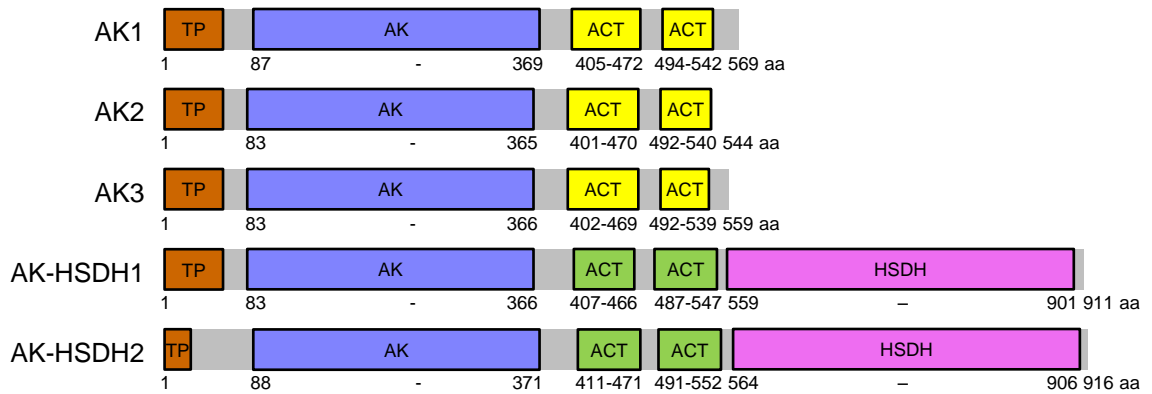

**Supplemental Figure S1.** Domains in full-length mono-functional AKs and dual-functional AK-HSDHs.

Brown boxes represent transit peptides; blue boxes represent AK domains; yellow boxes represent Lys-binding ACT domains; green boxes represent Thr-binding ACT domains; pink boxes represent HSDH domains. aa, amino acids. The numbers indicate the positions of first and last amino acids of the corresponding proteins and domains.

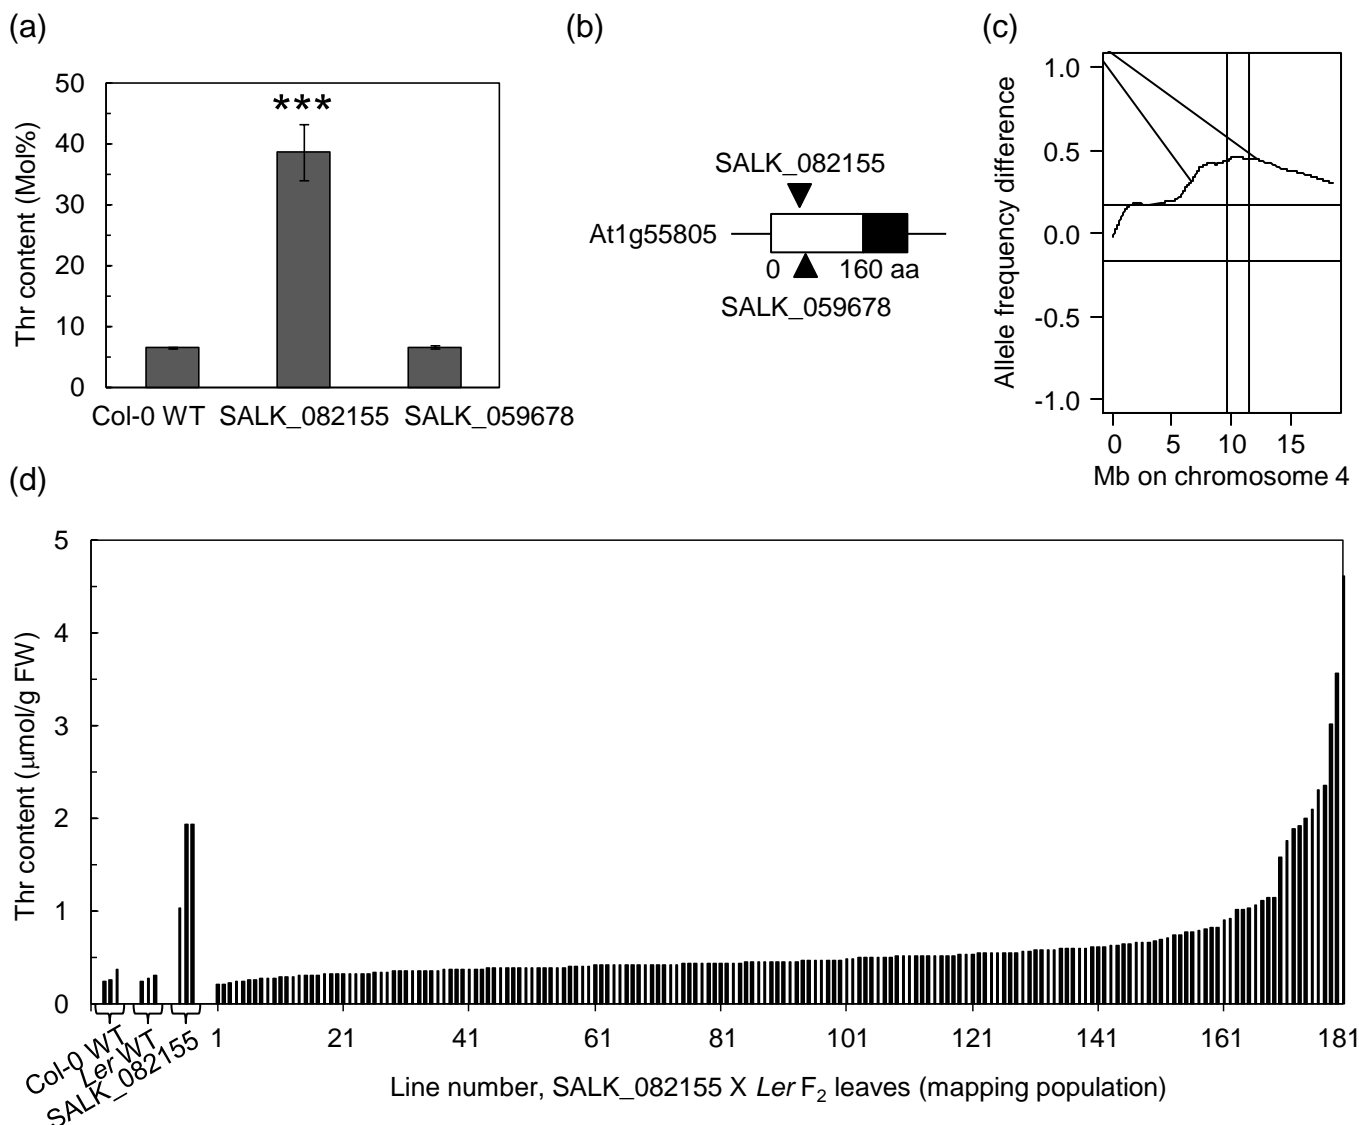

**Supplemental Figure S2.** The high Thr phenotype in SALK\_082155 is caused by a second-site mutation.

(a) Thr content (Mol%) in Col-0 wild type and the two mutants. The high Thr phenotype is observed in SALK\_082155 but not in SALK\_059678. Values are presented as mean  $\pm$  SE ( $n = 4$ ). Asterisks indicate significant differences between the mutant and the Col-0 wild type (Student's  $t$  test; \*,  $p < 0.05$ ; \*\*,  $p < 0.01$ ; \*\*\*,  $p < 0.001$ ).

(b) Schematic representation of the At1g55805 locus and two mutants: SALK\_082155 and SALK\_059678. The white rectangle represents a single exon; the black rectangle represents the 3' untranslated region; solid lines represent intergenic regions; black triangles represent T-DNA insertions.

(c) Bulk segregant array mapping of the mutation in SALK\_082155 that causes the Thr increase. The x-axis represents Arabidopsis chromosome 4. The y-axis represents allele frequency difference between mutant and wild-type pools. The allele frequency difference is positive for mutations in the Col-0 background and negative for mutations in the *Ler* background. SALK\_082155 is in the Col-0 background. According to array mapping results, the second-site mutation is within a 1.75 Mb region of chromosome 4 (coordinates: 9727489 - 11477489). Targeted genomic DNA sequencing shows that the mutation is located to the *AK-HSDH2* gene (At4g19710) in this region.

(d) Distribution of the Thr content in pooled  $F_2$  leaves from 181 segregating  $F_2$  lines derived from a cross between SALK\_082155 and *Ler* wild type. Bars representing leaf Thr content of three Col-0 wild-type plants, three *Ler* wild-type plants, and three SALK\_082155 mutant plants are indicated on the left end.

(a) *ak-hsdh2-1/ak-hsdh2-1 AK-HSDH1-1/ak-hsdh1-1*

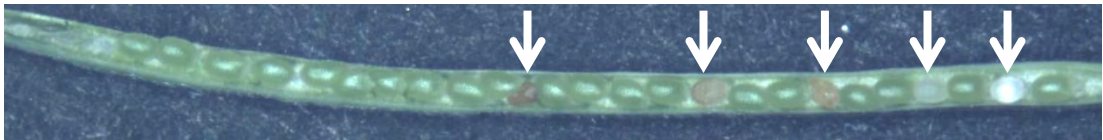

(b) Wild type in both *AK-HSDH2* and *AK-HSDH1* genes

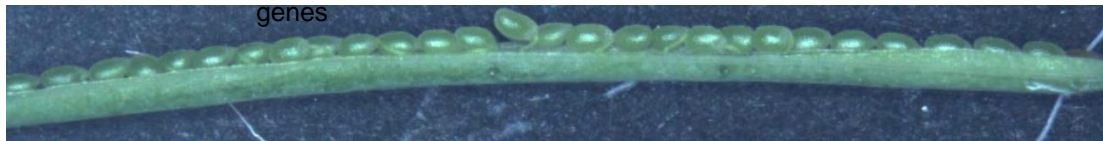

**Supplemental Figure S3.** Representative siliques from *ak-hsdh2-1/ak-hsdh2-1 AK-HSDH1-1/ak-hsdh1-1* and *AK-HSDH2-1/AK-HSDH2-1 AK-HSDH1-1/AK-HSDH1-1* plants. Arrows indicate aborted seeds.

(a) A representative silique from an *ak-hsdh2-1/ak-hsdh2-1 AK-HSDH1-1/ak-hsdh1-1* plant.

(b) A representative silique from an *AK-HSDH2-1/AK-HSDH2-1 AK-HSDH1-1/AK-HSDH1-1* plant.

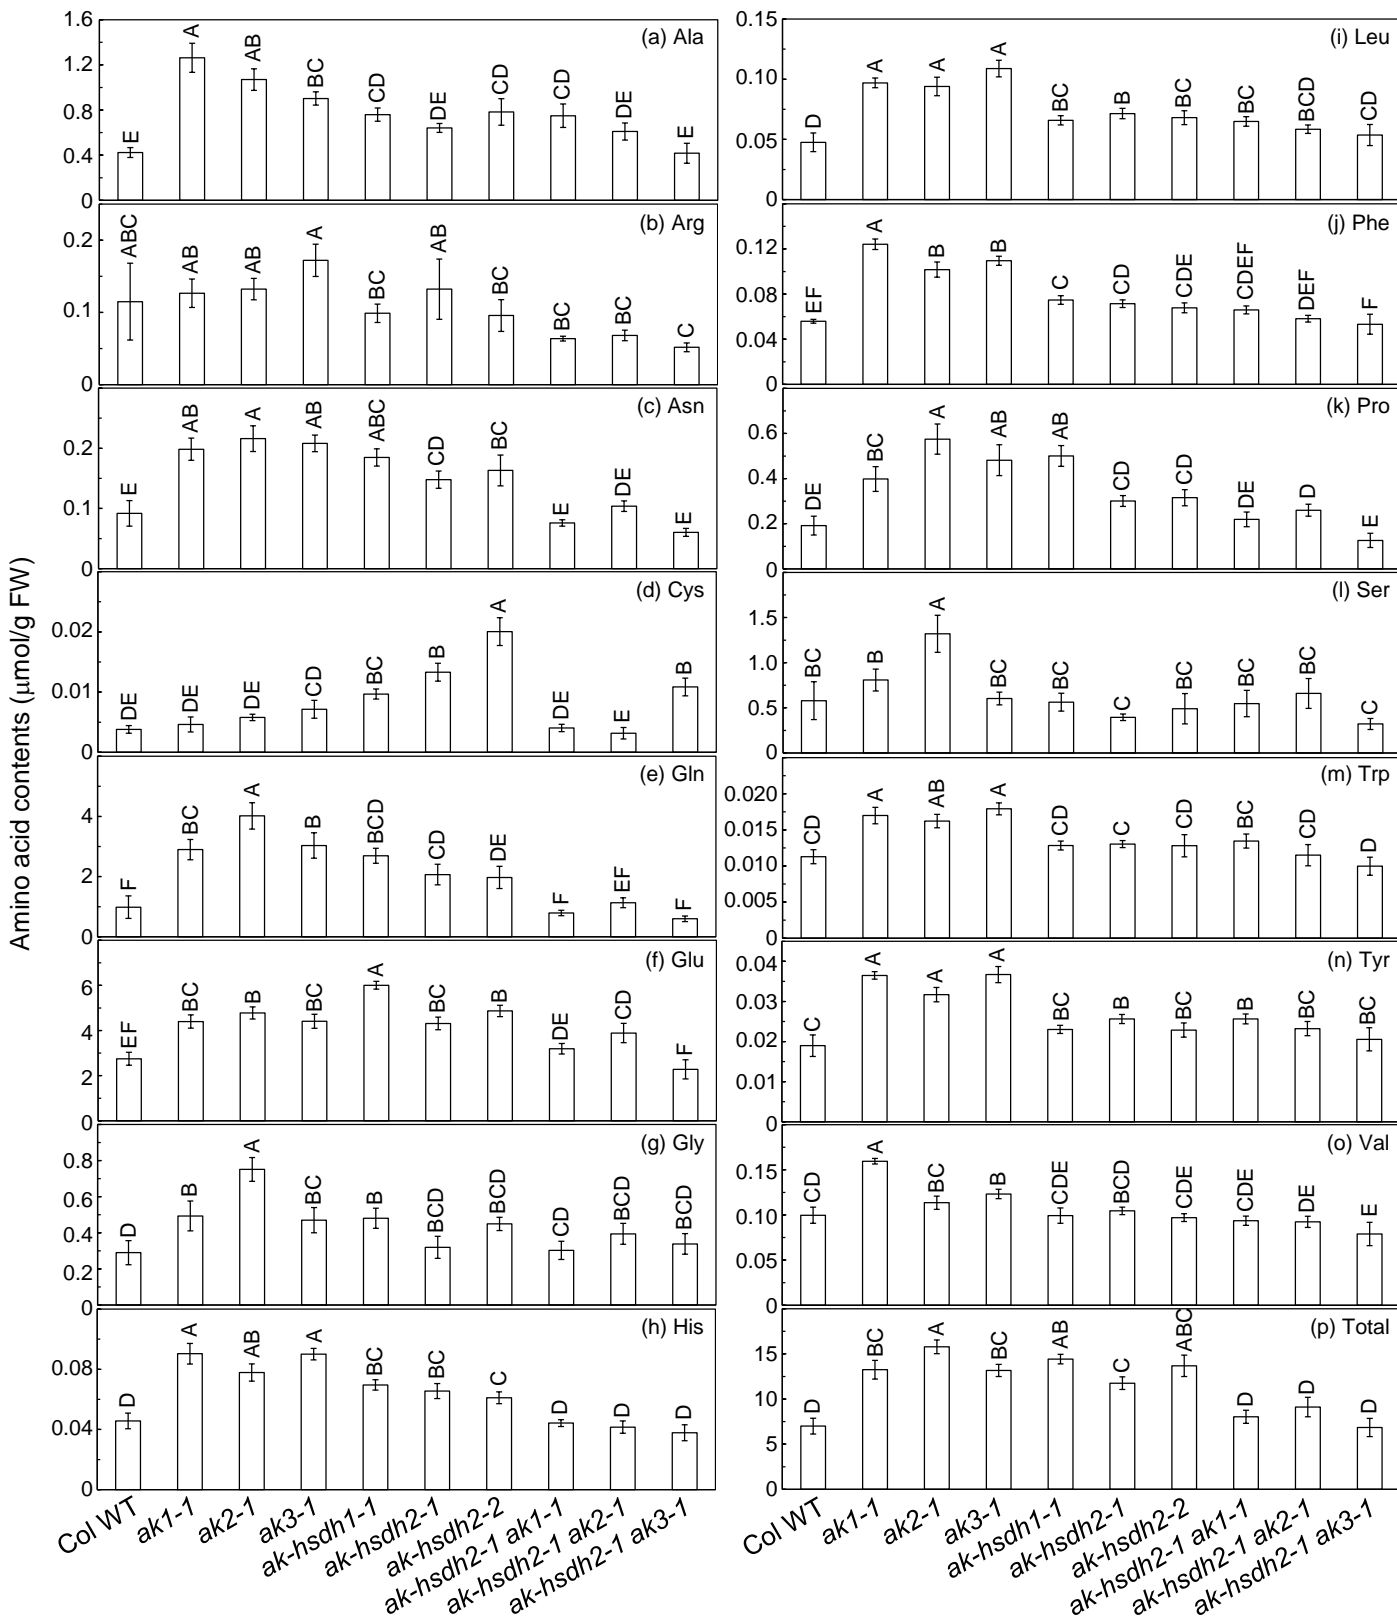

**Supplemental Figure S4.** The contents of other free amino acids in leaves of four-week-old plants. (a) Ala; (b) Arg; (c) Asn; (d) Cys; (e) Gln; (f) Glu; (g) Gly; (h) His; (i) Leu; (j) Phe; (k) Pro; (l) Ser; (m) Trp; (n) Tyr; (o) Val; (p) total amount of 20 standard amino acids. Values are presented as mean  $\pm$  SE (n = 5). Values not connected by the same letter are significantly different (Student's t-test,  $p < 0.05$ ). Values connected by the same letter are not significantly different.

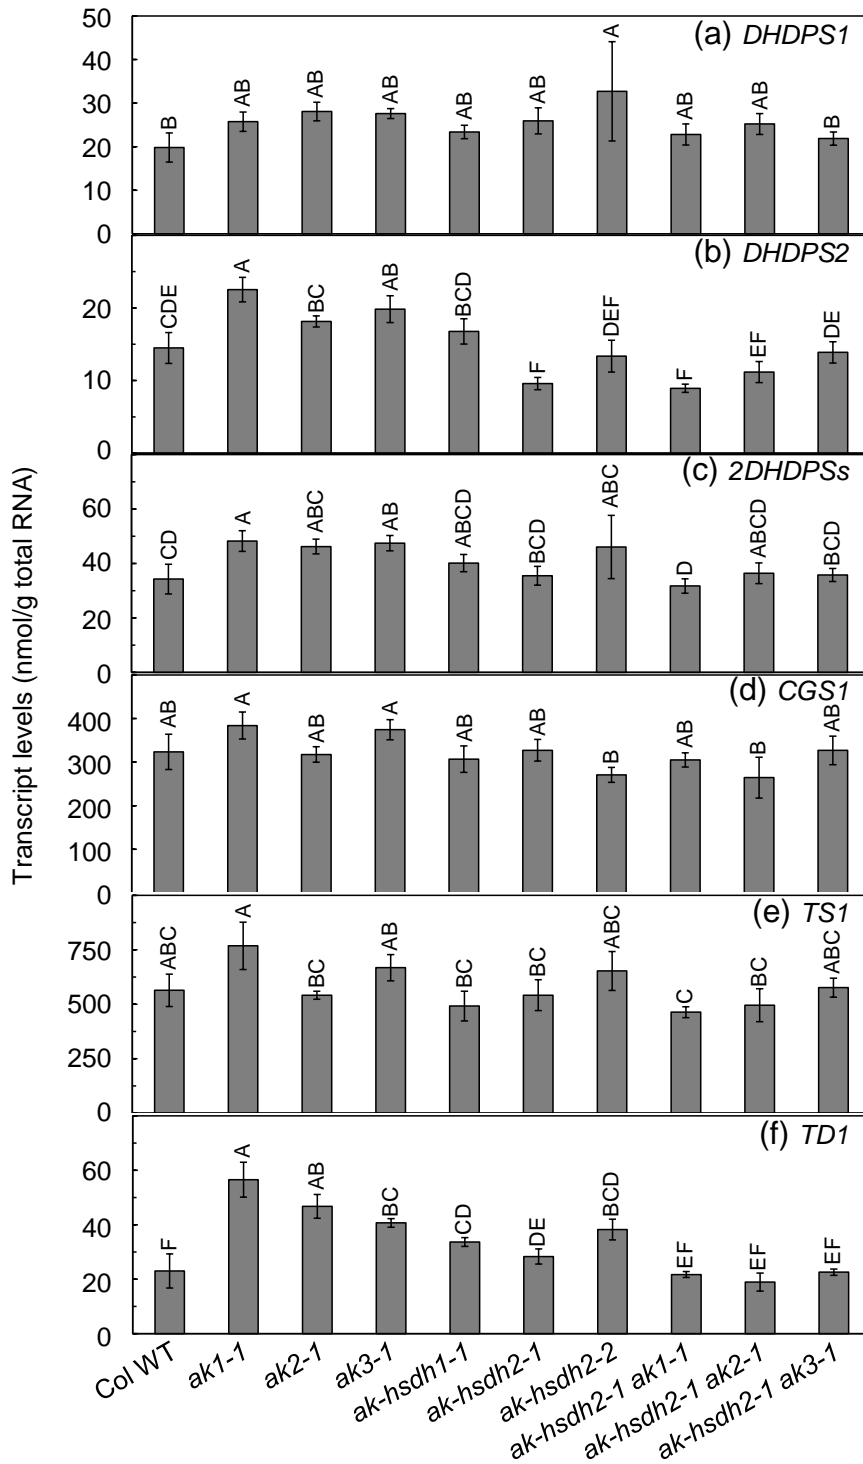

**Supplemental Figure S5.** Transcript levels of other genes involved in Asp-derived amino acid biosynthesis in leaves of four-week-old plants.

(a) *DHDPS1*; (b) *DHDPS2*; (c) *2DHDPSs*; (d) *CGS1*; (e) *TS1*; (f) *TD1*. Values are presented as mean  $\pm$  SE ( $n = 3 - 4$ ). Values not connected by the same letter are significantly different (Student's *t*-test,  $p < 0.05$ ). Values connected by the same letter are not significantly different.

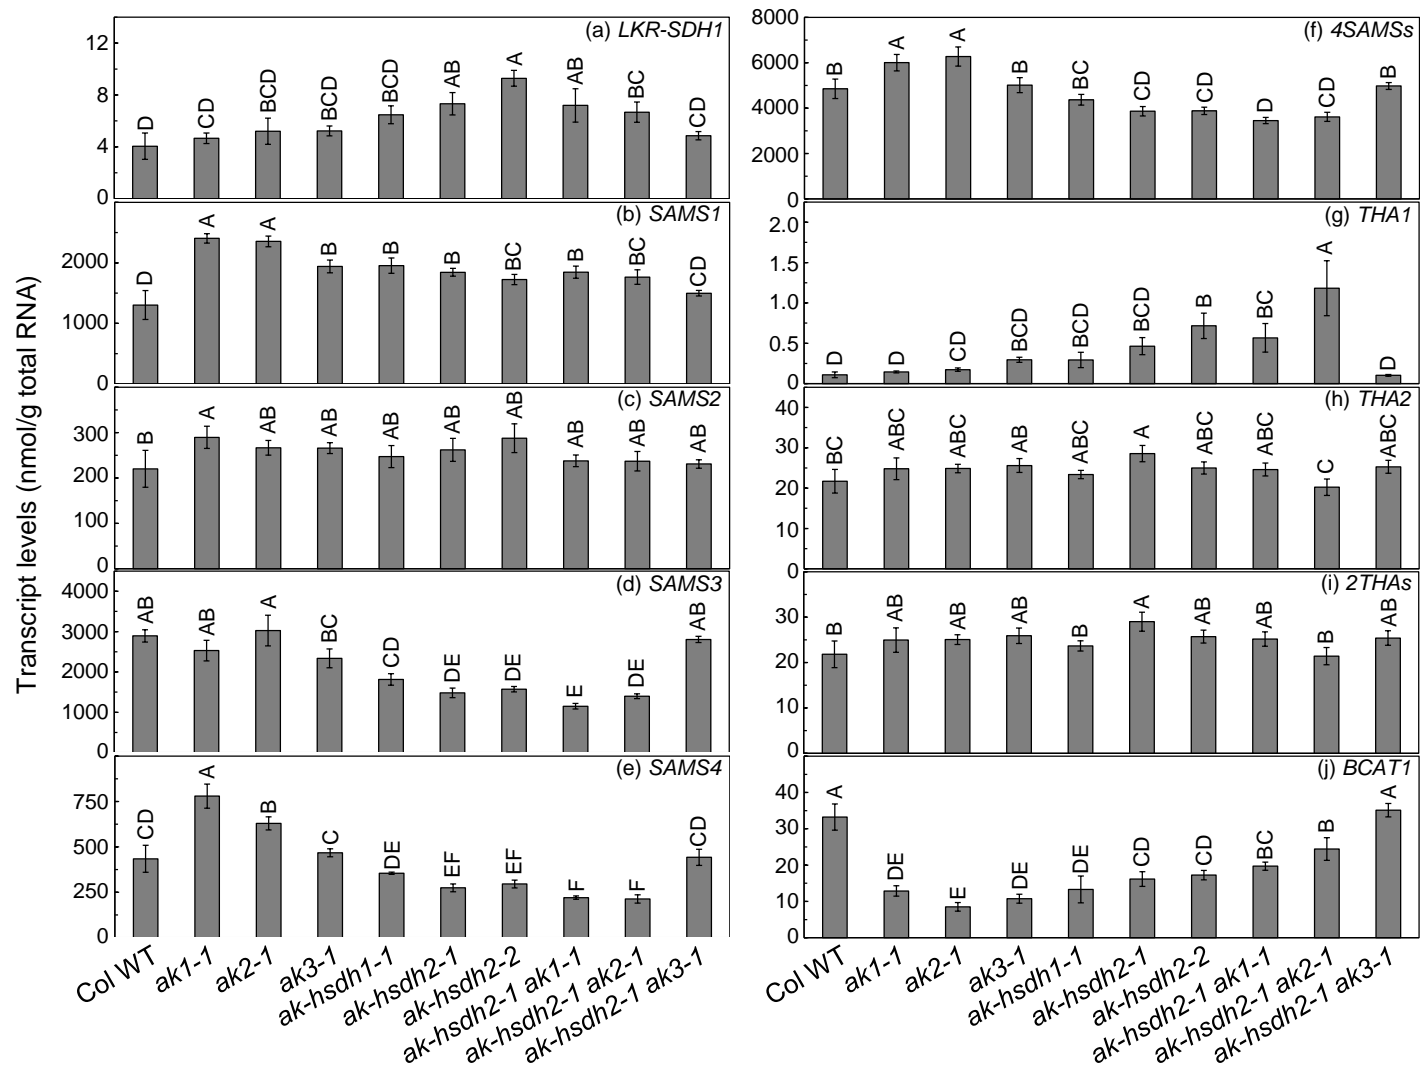

**Supplemental Figure S6.** Transcript levels of select genes involved in Asp-derived amino acid catabolism in leaves of four-week-old plants.

(a) *LKR-SDH1*; (b) *SAMS1*; (c) *SAMS2*; (d) *SAMS3*; (e) *SAMS4*; (f) *4SAMSs*; (g) *THA1*; (h) *THA2*; (i) *2THAs*; (j) *BCAT1*. Values are presented as mean  $\pm$  SE (*n* = 3 - 4). Values not connected by the same letter are significantly different (Student's *t*-test, *p* < 0.05). Values connected by the same letter are not significantly different.

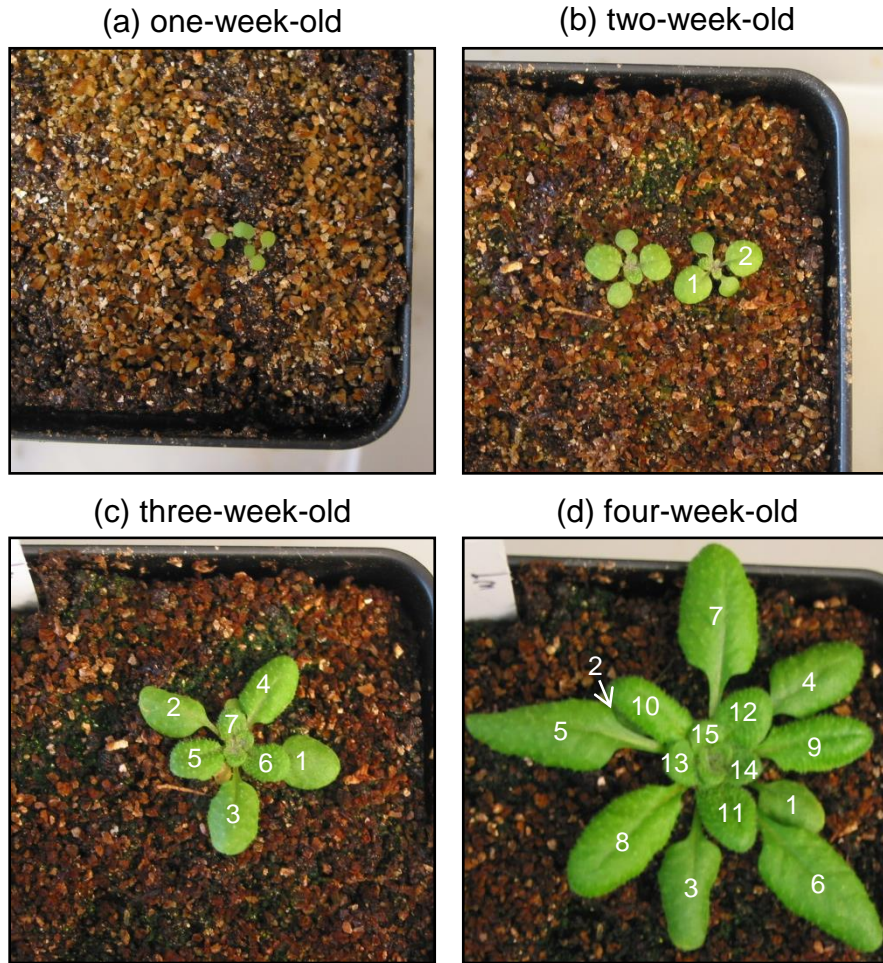

**Supplemental Figure S7.** Leaf numbering of one-, two-, three-, and four-week old Col-0 wild-type *Arabidopsis* plants grown under a 12-h-light /12-h-dark photoperiod.

(a) Image of one-week-old plants. Plants at this stage only have cotyledon leaves. Due to the relatively small size, the entire above-ground portion was harvested and approximately 20 plants per replicate were used for leaf free amino acid assay.

(b) Image of two-week-old plants. The first two true leaves are labeled in the order of emergence. The first two true leaves were harvested and approximately 10 plants per replicate were used for free amino acid assay.

(c) Image of a three-week-old plant. The first seven true leaves are labeled in the order of emergence. Leaf numbers 2 – 4 were harvested and one plant per replicate was used for leaf free amino acid assay.

(d) Image of a four-week-old plant. The first 15 leaves are labeled in the order of emergence. Leaf number 9 was used for free and protein-bound amino acid assays. Leaf numbers 8 – 10 were used for quantitative RT-PCR and immunoblot analyses. Due to the large amount of tissues required for enzyme extraction, the entire above-ground portion was used for enzyme activity assays.

**Supplemental Table S1.** The contents of protein-bound amino acids in leaves of four-week-old plants

Data are presented as mean  $\pm$  SE (n = 3 - 5). Due to technical reasons, Cys, Met, and Trp were not determined. Values not connected by the same letter are significantly different (Student's *t*-test, *p* < 0.05). Values connected by the same letter are not significantly different.

| Amino acid<br>( $\mu\text{mol/g FW}$ ) | Col WT                        | <i>ak1-1</i>                 | <i>ak2-1</i>                   | <i>ak3-1</i>                 | <i>ak-hsdh1-1</i>            | <i>ak-hsdh2-1</i>             | <i>ak-hsdh2-2</i>             | <i>ak-hsdh2-1 ak1-1</i>        | <i>ak-hsdh2-1 ak2-1</i>       | <i>ak-hsdh2-1 ak3-1</i>      |
|----------------------------------------|-------------------------------|------------------------------|--------------------------------|------------------------------|------------------------------|-------------------------------|-------------------------------|--------------------------------|-------------------------------|------------------------------|
| Ala                                    | 12.5 $\pm$ 3.9 <sup>ABC</sup> | 15.5 $\pm$ 5.4 <sup>A</sup>  | 11.2 $\pm$ 0.9 <sup>ABC</sup>  | 6.4 $\pm$ 0.4 <sup>C</sup>   | 7.0 $\pm$ 1.9 <sup>C</sup>   | 7.2 $\pm$ 1.1 <sup>BC</sup>   | 15.1 $\pm$ 1.0 <sup>AB</sup>  | 10.7 $\pm$ 1.8 <sup>ABC</sup>  | 11.8 $\pm$ 2.5 <sup>ABC</sup> | 15.9 $\pm$ 4.0 <sup>A</sup>  |
| Arg                                    | 4.9 $\pm$ 0.2 <sup>AB</sup>   | 4.7 $\pm$ 0.3 <sup>AB</sup>  | 4.4 $\pm$ 0.6 <sup>B</sup>     | 4.4 $\pm$ 0.3 <sup>B</sup>   | 5.1 $\pm$ 0.4 <sup>AB</sup>  | 4.8 $\pm$ 0.5 <sup>AB</sup>   | 5.0 $\pm$ 0.5 <sup>AB</sup>   | 5.6 $\pm$ 0.2 <sup>AB</sup>    | 5.8 $\pm$ 0.2 <sup>AB</sup>   | 5.4 $\pm$ 0.5 <sup>AB</sup>  |
| Asn+Asp <sup>a</sup>                   | 5.9 $\pm$ 1.7 <sup>ABC</sup>  | 6.8 $\pm$ 1.7 <sup>AB</sup>  | 3.9 $\pm$ 0.6 <sup>BCD</sup>   | 2.9 $\pm$ 0.2 <sup>U</sup>   | 3.0 $\pm$ 0.4 <sup>U</sup>   | 3.3 $\pm$ 0.5 <sup>CU</sup>   | 5.8 $\pm$ 0.8 <sup>ABCD</sup> | 4.0 $\pm$ 0.3 <sup>BCD</sup>   | 4.7 $\pm$ 0.2 <sup>ABCD</sup> | 7.1 $\pm$ 1.6 <sup>A</sup>   |
| Gln+Glu <sup>b</sup>                   | 28.7 $\pm$ 7.9 <sup>ABC</sup> | 32.8 $\pm$ 5.2 <sup>AB</sup> | 23.2 $\pm$ 2.9 <sup>BCDE</sup> | 14.4 $\pm$ 1.6 <sup>E</sup>  | 15.5 $\pm$ 4.5 <sup>DE</sup> | 18.3 $\pm$ 3.0 <sup>CDE</sup> | 31.2 $\pm$ 2.8 <sup>ABC</sup> | 27.8 $\pm$ 3.0 <sup>ABCD</sup> | 34.5 $\pm$ 6.8 <sup>AB</sup>  | 36.3 $\pm$ 5.9 <sup>A</sup>  |
| Gly                                    | 7.9 $\pm$ 2.4 <sup>AB</sup>   | 8.7 $\pm$ 1.9 <sup>AB</sup>  | 6.9 $\pm$ 0.4 <sup>AB</sup>    | 5.5 $\pm$ 0.6 <sup>B</sup>   | 4.9 $\pm$ 1.1 <sup>B</sup>   | 4.7 $\pm$ 0.8 <sup>B</sup>    | 9.9 $\pm$ 1.1 <sup>A</sup>    | 6.9 $\pm$ 0.9 <sup>AB</sup>    | 6.6 $\pm$ 0.5 <sup>AB</sup>   | 10.1 $\pm$ 1.9 <sup>A</sup>  |
| His                                    | 4.5 $\pm$ 0.1 <sup>A</sup>    | 4.6 $\pm$ 0.3 <sup>A</sup>   | 4.3 $\pm$ 0.4 <sup>A</sup>     | 4.3 $\pm$ 0.3 <sup>A</sup>   | 4.8 $\pm$ 0.1 <sup>A</sup>   | 4.5 $\pm$ 0.4 <sup>A</sup>    | 4.4 $\pm$ 0.2 <sup>A</sup>    | 4.6 $\pm$ 0.1 <sup>A</sup>     | 4.6 $\pm$ 0.3 <sup>A</sup>    | 4.7 $\pm$ 0.2 <sup>A</sup>   |
| Ile                                    | 11.5 $\pm$ 0.2 <sup>A</sup>   | 11.2 $\pm$ 0.9 <sup>A</sup>  | 10.9 $\pm$ 0.7 <sup>A</sup>    | 11.3 $\pm$ 0.4 <sup>A</sup>  | 11.6 $\pm$ 0.5 <sup>A</sup>  | 11.2 $\pm$ 0.7 <sup>A</sup>   | 11.6 $\pm$ 0.6 <sup>A</sup>   | 11.8 $\pm$ 0.4 <sup>A</sup>    | 11.9 $\pm$ 0.5 <sup>A</sup>   | 12.0 $\pm$ 0.5 <sup>A</sup>  |
| Leu                                    | 18.8 $\pm$ 0.6 <sup>A</sup>   | 19.3 $\pm$ 0.8 <sup>A</sup>  | 18.2 $\pm$ 1.2 <sup>A</sup>    | 18.3 $\pm$ 0.9 <sup>A</sup>  | 19.0 $\pm$ 0.7 <sup>A</sup>  | 17.7 $\pm$ 1.0 <sup>A</sup>   | 18.8 $\pm$ 0.6 <sup>A</sup>   | 18.9 $\pm$ 0.5 <sup>A</sup>    | 18.1 $\pm$ 0.0 <sup>A</sup>   | 18.8 $\pm$ 0.5 <sup>A</sup>  |
| Lys                                    | 13.2 $\pm$ 0.3 <sup>A</sup>   | 13.8 $\pm$ 0.4 <sup>A</sup>  | 12.4 $\pm$ 1.0 <sup>A</sup>    | 13.0 $\pm$ 1.1 <sup>A</sup>  | 13.7 $\pm$ 0.7 <sup>A</sup>  | 13.1 $\pm$ 0.8 <sup>A</sup>   | 13.1 $\pm$ 0.6 <sup>A</sup>   | 13.7 $\pm$ 0.4 <sup>A</sup>    | 14.4 $\pm$ 0.8 <sup>A</sup>   | 13.4 $\pm$ 0.7 <sup>A</sup>  |
| Phe                                    | 9.6 $\pm$ 0.1 <sup>A</sup>    | 9.5 $\pm$ 0.5 <sup>A</sup>   | 9.3 $\pm$ 0.9 <sup>A</sup>     | 9.1 $\pm$ 0.5 <sup>A</sup>   | 9.9 $\pm$ 0.4 <sup>A</sup>   | 9.2 $\pm$ 0.5 <sup>A</sup>    | 9.1 $\pm$ 0.3 <sup>A</sup>    | 9.4 $\pm$ 0.3 <sup>A</sup>     | 10.1 $\pm$ 0.4 <sup>A</sup>   | 9.7 $\pm$ 0.2 <sup>A</sup>   |
| Pro                                    | 10.9 $\pm$ 1.7 <sup>AB</sup>  | 12.0 $\pm$ 1.9 <sup>AB</sup> | 10.2 $\pm$ 0.5 <sup>AB</sup>   | 8.4 $\pm$ 0.5 <sup>B</sup>   | 8.5 $\pm$ 1.1 <sup>B</sup>   | 8.8 $\pm$ 0.4 <sup>B</sup>    | 12.9 $\pm$ 0.6 <sup>A</sup>   | 10.1 $\pm$ 0.7 <sup>AB</sup>   | 12.1 $\pm$ 2.3 <sup>AB</sup>  | 13.0 $\pm$ 1.8 <sup>A</sup>  |
| Ser                                    | 4.6 $\pm$ 1.6 <sup>ABC</sup>  | 5.6 $\pm$ 2.1 <sup>AB</sup>  | 2.7 $\pm$ 0.4 <sup>BC</sup>    | 2.1 $\pm$ 0.2 <sup>C</sup>   | 2.4 $\pm$ 0.5 <sup>C</sup>   | 2.6 $\pm$ 0.3 <sup>BC</sup>   | 4.6 $\pm$ 0.7 <sup>ABC</sup>  | 3.1 $\pm$ 0.3 <sup>BC</sup>    | 3.8 $\pm$ 0.3 <sup>ABC</sup>  | 6.0 $\pm$ 1.5 <sup>A</sup>   |
| Thr                                    | 4.9 $\pm$ 1.4 <sup>AB</sup>   | 6.6 $\pm$ 0.75 <sup>A</sup>  | 4.5 $\pm$ 0.6 <sup>AB</sup>    | 3.4 $\pm$ 0.2 <sup>B</sup>   | 3.1 $\pm$ 0.9 <sup>B</sup>   | 3.0 $\pm$ 0.9 <sup>B</sup>    | 5.6 $\pm$ 1.4 <sup>AB</sup>   | 4.7 $\pm$ 0.9 <sup>AB</sup>    | 5.6 $\pm$ 1.1 <sup>AB</sup>   | 5.8 $\pm$ 1.6 <sup>AB</sup>  |
| Tyr                                    | 0.88 $\pm$ 0.09 <sup>A</sup>  | 1.1 $\pm$ 0.2 <sup>A</sup>   | 0.79 $\pm$ 0.17 <sup>A</sup>   | 0.78 $\pm$ 0.09 <sup>A</sup> | 0.89 $\pm$ 0.15 <sup>A</sup> | 0.81 $\pm$ 0.08 <sup>A</sup>  | 0.88 $\pm$ 0.05 <sup>A</sup>  | 0.81 $\pm$ 0.09 <sup>A</sup>   | 0.90 $\pm$ 0.04 <sup>A</sup>  | 1.1 $\pm$ 0.1 <sup>A</sup>   |
| Val                                    | 15.6 $\pm$ 1.1 <sup>AB</sup>  | 15.7 $\pm$ 0.6 <sup>AB</sup> | 13.9 $\pm$ 1.2 <sup>B</sup>    | 15.5 $\pm$ 0.5 <sup>AB</sup> | 15.7 $\pm$ 0.8 <sup>AB</sup> | 15.0 $\pm$ 1.1 <sup>AB</sup>  | 14.9 $\pm$ 0.2 <sup>AB</sup>  | 16.1 $\pm$ 1.0 <sup>AB</sup>   | 15.1 $\pm$ 0.7 <sup>AB</sup>  | 17.1 $\pm$ 0.7 <sup>A</sup>  |
| Asn+Asp+Ile+<br>Thr+Lys <sup>c</sup>   | 35.8 $\pm$ 3.4 <sup>ABC</sup> | 38.8 $\pm$ 1.8 <sup>AB</sup> | 32.0 $\pm$ 2.7 <sup>ABC</sup>  | 30.8 $\pm$ 1.6 <sup>C</sup>  | 31.6 $\pm$ 2.0 <sup>BC</sup> | 30.9 $\pm$ 2.7 <sup>C</sup>   | 36.3 $\pm$ 1.2 <sup>ABC</sup> | 34.4 $\pm$ 1.1 <sup>ABC</sup>  | 36.9 $\pm$ 1.2 <sup>ABC</sup> | 38.6 $\pm$ 2.9 <sup>AB</sup> |
| Total <sup>d</sup>                     | 154 $\pm$ 22 <sup>ABCD</sup>  | 168 $\pm$ 17 <sup>AB</sup>   | 137 $\pm$ 10 <sup>BCD</sup>    | 120 $\pm$ 5 <sup>D</sup>     | 125 $\pm$ 11 <sup>CD</sup>   | 125 $\pm$ 11 <sup>CD</sup>    | 163 $\pm$ 6 <sup>ABC</sup>    | 148 $\pm$ 6 <sup>ABCD</sup>    | 160 $\pm$ 12 <sup>ABCD</sup>  | 176 $\pm$ 19 <sup>A</sup>    |

<sup>a</sup>Asn and Asp are reported together because Asn was converted to Asp during acid hydrolysis.

<sup>b</sup>Gln and Glu are reported together because Gln was converted to Glu during acid hydrolysis.

<sup>c</sup>Asn+Asp+Ile+Thr+Lys stands for the total amount of protein-bound Asn, Asp, Ile, Thr, and Lys.

<sup>d</sup>Total amino acids refer to the total amount of 17 amino acids in this table. Cys, Met, and Trp are not included because they are either destroyed (Cys and Trp) or partially oxidized (Met) during acid hydrolysis.



**Supplemental Table S2.** Leaf free amino acid contents in one-week-old plants

Data are presented as mean  $\pm$  SE (n = 5). Values not connected by the same letter are significantly different (Student's *t*-test, *p* < 0.05). Values connected by the same letter are not significantly different.

| Amino acid<br>( $\mu$ mol/g<br>FW) | Col WT                           | <i>ak1-1</i>                      | <i>ak2-1</i>                     | <i>ak3-1</i>                     | <i>ak-hsdh1-1</i>                | <i>ak-hsdh2-1</i>                 | <i>ak-hsdh2-2</i>                | <i>ak-hsdh2-1 ak1-1</i>          | <i>ak-hsdh2-1 ak2-1</i>           | <i>ak-hsdh2-1 ak3-1</i>          |
|------------------------------------|----------------------------------|-----------------------------------|----------------------------------|----------------------------------|----------------------------------|-----------------------------------|----------------------------------|----------------------------------|-----------------------------------|----------------------------------|
| Ala                                | 1.10 $\pm$ 0.06 <sup>B</sup>     | 1.42 $\pm$ 0.07 <sup>A</sup>      | 1.04 $\pm$ 0.11 <sup>BC</sup>    | 1.06 $\pm$ 0.08 <sup>BC</sup>    | 0.79 $\pm$ 0.12 <sup>D</sup>     | 0.84 $\pm$ 0.08 <sup>CD</sup>     | 0.68 $\pm$ 0.06 <sup>D</sup>     | 1.04 $\pm$ 0.04 <sup>BC</sup>    | 0.70 $\pm$ 0.09 <sup>D</sup>      | 0.77 $\pm$ 0.03 <sup>D</sup>     |
| Arg                                | 0.033 $\pm$ 0.000 <sup>AB</sup>  | 0.034 $\pm$ 0.003 <sup>AB</sup>   | 0.033 $\pm$ 0.002 <sup>AB</sup>  | 0.034 $\pm$ 0.003 <sup>AB</sup>  | 0.034 $\pm$ 0.001 <sup>AB</sup>  | 0.032 $\pm$ 0.001 <sup>AB</sup>   | 0.037 $\pm$ 0.001 <sup>A</sup>   | 0.031 $\pm$ 0.001 <sup>B</sup>   | 0.035 $\pm$ 0.001 <sup>AB</sup>   | 0.034 $\pm$ 0.002 <sup>AB</sup>  |
| Asn                                | 0.19 $\pm$ 0.01 <sup>A</sup>     | 0.16 $\pm$ 0.00 <sup>B</sup>      | 0.14 $\pm$ 0.01 <sup>BC</sup>    | 0.15 $\pm$ 0.01 <sup>BC</sup>    | 0.11 $\pm$ 0.01 <sup>DE</sup>    | 0.13 $\pm$ 0.01 <sup>CD</sup>     | 0.10 $\pm$ 0.01 <sup>E</sup>     | 0.15 $\pm$ 0.01 <sup>BC</sup>    | 0.12 $\pm$ 0.01 <sup>DE</sup>     | 0.15 $\pm$ 0.00 <sup>BC</sup>    |
| Asp                                | 1.71 $\pm$ 0.08 <sup>ABC</sup>   | 1.64 $\pm$ 0.07 <sup>BCD</sup>    | 1.51 $\pm$ 0.06 <sup>DE</sup>    | 1.78 $\pm$ 0.09 <sup>AB</sup>    | 1.44 $\pm$ 0.04 <sup>EF</sup>    | 1.84 $\pm$ 0.09 <sup>A</sup>      | 1.50 $\pm$ 0.05 <sup>DE</sup>    | 1.80 $\pm$ 0.04 <sup>AB</sup>    | 1.30 $\pm$ 0.05 <sup>F</sup>      | 1.57 $\pm$ 0.04 <sup>CDE</sup>   |
| Cys                                | 0.007 $\pm$ 0.001 <sup>BCD</sup> | 0.008 $\pm$ 0.000 <sup>B</sup>    | 0.003 $\pm$ 0.000 <sup>D</sup>   | 0.007 $\pm$ 0.001 <sup>BC</sup>  | 0.006 $\pm$ 0.002 <sup>BCD</sup> | 0.013 $\pm$ 0.004 <sup>A</sup>    | 0.004 $\pm$ 0.001 <sup>BCD</sup> | 0.005 $\pm$ 0.001 <sup>BCD</sup> | 0.003 $\pm$ 0.001 <sup>CD</sup>   | 0.008 $\pm$ 0.001 <sup>BC</sup>  |
| Gln                                | 1.89 $\pm$ 0.12 <sup>A</sup>     | 1.61 $\pm$ 0.09 <sup>B</sup>      | 1.10 $\pm$ 0.09 <sup>CD</sup>    | 1.16 $\pm$ 0.04 <sup>CD</sup>    | 0.77 $\pm$ 0.02 <sup>EF</sup>    | 1.00 $\pm$ 0.08 <sup>DE</sup>     | 0.65 $\pm$ 0.04 <sup>F</sup>     | 1.92 $\pm$ 0.08 <sup>A</sup>     | 1.00 $\pm$ 0.14 <sup>DE</sup>     | 1.32 $\pm$ 0.08 <sup>C</sup>     |
| Glu                                | 6.68 $\pm$ 0.36 <sup>A</sup>     | 5.45 $\pm$ 0.26 <sup>B</sup>      | 4.03 $\pm$ 0.31 <sup>C</sup>     | 5.41 $\pm$ 0.37 <sup>B</sup>     | 3.89 $\pm$ 0.21 <sup>C</sup>     | 5.65 $\pm$ 0.23 <sup>B</sup>      | 4.22 $\pm$ 0.35 <sup>C</sup>     | 5.70 $\pm$ 0.24 <sup>B</sup>     | 3.94 $\pm$ 0.26 <sup>C</sup>      | 5.99 $\pm$ 0.33 <sup>AB</sup>    |
| Gly                                | 0.68 $\pm$ 0.07 <sup>A</sup>     | 0.32 $\pm$ 0.03 <sup>C</sup>      | 0.16 $\pm$ 0.01 <sup>D</sup>     | 0.24 $\pm$ 0.02 <sup>CD</sup>    | 0.16 $\pm$ 0.02 <sup>D</sup>     | 0.22 $\pm$ 0.02 <sup>D</sup>      | 0.15 $\pm$ 0.03 <sup>D</sup>     | 0.47 $\pm$ 0.02 <sup>B</sup>     | 0.23 $\pm$ 0.03 <sup>CD</sup>     | 0.48 $\pm$ 0.03 <sup>B</sup>     |
| His                                | 0.047 $\pm$ 0.002 <sup>BCD</sup> | 0.059 $\pm$ 0.004 <sup>A</sup>    | 0.053 $\pm$ 0.004 <sup>B</sup>   | 0.042 $\pm$ 0.001 <sup>DE</sup>  | 0.037 $\pm$ 0.001 <sup>EF</sup>  | 0.033 $\pm$ 0.001 <sup>F</sup>    | 0.035 $\pm$ 0.001 <sup>EF</sup>  | 0.049 $\pm$ 0.001 <sup>BC</sup>  | 0.043 $\pm$ 0.004 <sup>CD</sup>   | 0.040 $\pm$ 0.002 <sup>DE</sup>  |
| Ile                                | 0.024 $\pm$ 0.002 <sup>E</sup>   | 0.027 $\pm$ 0.002 <sup>BCDE</sup> | 0.025 $\pm$ 0.002 <sup>DE</sup>  | 0.031 $\pm$ 0.003 <sup>BC</sup>  | 0.029 $\pm$ 0.001 <sup>BCD</sup> | 0.031 $\pm$ 0.001 <sup>B</sup>    | 0.037 $\pm$ 0.001 <sup>A</sup>   | 0.024 $\pm$ 0.000 <sup>E</sup>   | 0.024 $\pm$ 0.002 <sup>DE</sup>   | 0.026 $\pm$ 0.001 <sup>CDE</sup> |
| Leu                                | 0.031 $\pm$ 0.001 <sup>D</sup>   | 0.042 $\pm$ 0.003 <sup>AB</sup>   | 0.043 $\pm$ 0.004 <sup>AB</sup>  | 0.046 $\pm$ 0.005 <sup>A</sup>   | 0.038 $\pm$ 0.001 <sup>BC</sup>  | 0.038 $\pm$ 0.002 <sup>BC</sup>   | 0.042 $\pm$ 0.001 <sup>AB</sup>  | 0.032 $\pm$ 0.001 <sup>CD</sup>  | 0.032 $\pm$ 0.001 <sup>CD</sup>   | 0.030 $\pm$ 0.001 <sup>D</sup>   |
| Lys                                | 0.056 $\pm$ 0.002 <sup>D</sup>   | 0.070 $\pm$ 0.006 <sup>ABC</sup>  | 0.064 $\pm$ 0.005 <sup>BCD</sup> | 0.076 $\pm$ 0.007 <sup>A</sup>   | 0.073 $\pm$ 0.002 <sup>AB</sup>  | 0.069 $\pm$ 0.003 <sup>ABC</sup>  | 0.075 $\pm$ 0.002 <sup>A</sup>   | 0.057 $\pm$ 0.002 <sup>D</sup>   | 0.060 $\pm$ 0.005 <sup>CD</sup>   | 0.061 $\pm$ 0.002 <sup>CD</sup>  |
| Met                                | 0.037 $\pm$ 0.002 <sup>AB</sup>  | 0.032 $\pm$ 0.001 <sup>BCD</sup>  | 0.033 $\pm$ 0.002 <sup>BCD</sup> | 0.033 $\pm$ 0.002 <sup>BC</sup>  | 0.025 $\pm$ 0.001 <sup>EF</sup>  | 0.027 $\pm$ 0.001 <sup>DEF</sup>  | 0.024 $\pm$ 0.001 <sup>F</sup>   | 0.039 $\pm$ 0.001 <sup>A</sup>   | 0.034 $\pm$ 0.004 <sup>ABC</sup>  | 0.030 $\pm$ 0.002 <sup>CDE</sup> |
| Phe                                | 0.048 $\pm$ 0.001 <sup>D</sup>   | 0.067 $\pm$ 0.005 <sup>A</sup>    | 0.064 $\pm$ 0.003 <sup>AB</sup>  | 0.064 $\pm$ 0.004 <sup>AB</sup>  | 0.062 $\pm$ 0.000 <sup>ABC</sup> | 0.058 $\pm$ 0.001 <sup>BC</sup>   | 0.057 $\pm$ 0.001 <sup>C</sup>   | 0.049 $\pm$ 0.001 <sup>D</sup>   | 0.048 $\pm$ 0.001 <sup>D</sup>    | 0.044 $\pm$ 0.002 <sup>D</sup>   |
| Pro                                | 0.28 $\pm$ 0.02 <sup>BC</sup>    | 0.34 $\pm$ 0.02 <sup>AB</sup>     | 0.23 $\pm$ 0.02 <sup>CD</sup>    | 0.36 $\pm$ 0.03 <sup>A</sup>     | 0.21 $\pm$ 0.02 <sup>D</sup>     | 0.33 $\pm$ 0.02 <sup>AB</sup>     | 0.20 $\pm$ 0.03 <sup>D</sup>     | 0.34 $\pm$ 0.02 <sup>AB</sup>    | 0.18 $\pm$ 0.02 <sup>D</sup>      | 0.20 $\pm$ 0.01 <sup>D</sup>     |
| Ser                                | 0.97 $\pm$ 0.09 <sup>A</sup>     | 0.72 $\pm$ 0.03 <sup>B</sup>      | 0.29 $\pm$ 0.03 <sup>DE</sup>    | 0.34 $\pm$ 0.01 <sup>DE</sup>    | 0.21 $\pm$ 0.01 <sup>E</sup>     | 0.42 $\pm$ 0.06 <sup>CD</sup>     | 0.27 $\pm$ 0.03 <sup>E</sup>     | 1.01 $\pm$ 0.08 <sup>A</sup>     | 0.49 $\pm$ 0.04 <sup>C</sup>      | 0.78 $\pm$ 0.05 <sup>B</sup>     |
| Thr                                | 0.67 $\pm$ 0.13 <sup>BC</sup>    | 0.47 $\pm$ 0.04 <sup>CD</sup>     | 0.21 $\pm$ 0.02 <sup>E</sup>     | 0.70 $\pm$ 0.07 <sup>B</sup>     | 0.59 $\pm$ 0.09 <sup>BCD</sup>   | 1.01 $\pm$ 0.04 <sup>A</sup>      | 0.66 $\pm$ 0.09 <sup>BC</sup>    | 0.45 $\pm$ 0.02 <sup>D</sup>     | 0.23 $\pm$ 0.08 <sup>E</sup>      | 0.70 $\pm$ 0.06 <sup>B</sup>     |
| Trp                                | 0.009 $\pm$ 0.000 <sup>A</sup>   | 0.010 $\pm$ 0.001 <sup>A</sup>    | 0.009 $\pm$ 0.001 <sup>A</sup>   | 0.010 $\pm$ 0.001 <sup>A</sup>   | 0.009 $\pm$ 0.000 <sup>A</sup>   | 0.009 $\pm$ 0.000 <sup>A</sup>    | 0.008 $\pm$ 0.000 <sup>A</sup>   | 0.009 $\pm$ 0.000 <sup>A</sup>   | 0.008 $\pm$ 0.000 <sup>A</sup>    | 0.008 $\pm$ 0.000 <sup>A</sup>   |
| Tyr                                | 0.012 $\pm$ 0.000 <sup>D</sup>   | 0.016 $\pm$ 0.001 <sup>A</sup>    | 0.016 $\pm$ 0.001 <sup>AB</sup>  | 0.015 $\pm$ 0.001 <sup>ABC</sup> | 0.013 $\pm$ 0.000 <sup>BCD</sup> | 0.014 $\pm$ 0.001 <sup>ABCD</sup> | 0.016 $\pm$ 0.001 <sup>A</sup>   | 0.012 $\pm$ 0.000 <sup>D</sup>   | 0.014 $\pm$ 0.001 <sup>ABCD</sup> | 0.013 $\pm$ 0.000 <sup>CD</sup>  |
| Val                                | 0.109 $\pm$ 0.002 <sup>BCD</sup> | 0.131 $\pm$ 0.011 <sup>A</sup>    | 0.117 $\pm$ 0.008 <sup>AB</sup>  | 0.117 $\pm$ 0.008 <sup>AB</sup>  | 0.095 $\pm$ 0.002 <sup>D</sup>   | 0.100 $\pm$ 0.002 <sup>CD</sup>   | 0.106 $\pm$ 0.004 <sup>BCD</sup> | 0.112 $\pm$ 0.003 <sup>BC</sup>  | 0.104 $\pm$ 0.002 <sup>BCD</sup>  | 0.105 $\pm$ 0.003 <sup>BCD</sup> |
| Asp-derived <sup>a</sup>           | 0.79 $\pm$ 0.14 <sup>BC</sup>    | 0.60 $\pm$ 0.04 <sup>CD</sup>     | 0.33 $\pm$ 0.02 <sup>E</sup>     | 0.84 $\pm$ 0.07 <sup>B</sup>     | 0.71 $\pm$ 0.09 <sup>BCD</sup>   | 1.13 $\pm$ 0.04 <sup>A</sup>      | 0.79 $\pm$ 0.09 <sup>BC</sup>    | 0.57 $\pm$ 0.02 <sup>D</sup>     | 0.34 $\pm$ 0.09 <sup>E</sup>      | 0.82 $\pm$ 0.06 <sup>B</sup>     |
| Total <sup>b</sup>                 | 14.6 $\pm$ 0.7 <sup>A</sup>      | 12.6 $\pm$ 0.5 <sup>BC</sup>      | 9.2 $\pm$ 0.6 <sup>D</sup>       | 11.7 $\pm$ 0.7 <sup>C</sup>      | 8.3 $\pm$ 0.4 <sup>D</sup>       | 11.5 $\pm$ 0.4 <sup>C</sup>       | 8.9 $\pm$ 0.6 <sup>D</sup>       | 13.3 $\pm$ 0.4 <sup>AB</sup>     | 8.6 $\pm$ 0.6 <sup>D</sup>        | 12.4 $\pm$ 0.5 <sup>BC</sup>     |

<sup>a</sup>Asp-derived amino acids refer to the total amount of Ile, Lys, Met, and Thr.

<sup>b</sup>Total amino acids refer to the total amount of 20 standard amino acids in this table.

**Supplemental Table S3. Leaf free amino acid contents in two-week-old plants**

Data are presented as mean ± SE (n = 5). Values not connected by the same letter are significantly different (Student's *t*-test, *p* < 0.05). Values connected by the same letter are not significantly different.

| Amino acid (μmol/g FW) <sup>a</sup> | Col WT                      | <i>ak1-1</i>                 | <i>ak2-1</i>                | <i>ak3-1</i>                 | <i>ak-hsdh1-1</i>            | <i>ak-hsdh2-1</i>            | <i>ak-hsdh2-2</i>            | <i>ak-hsdh2-1 ak1-1</i>       | <i>ak-hsdh2-1 ak2-1</i>      | <i>ak-hsdh2-1 ak3-1</i>     |
|-------------------------------------|-----------------------------|------------------------------|-----------------------------|------------------------------|------------------------------|------------------------------|------------------------------|-------------------------------|------------------------------|-----------------------------|
| Ala                                 | 1.74 ± 0.12 <sup>A</sup>    | 1.58 ± 0.08 <sup>AB</sup>    | 0.92 ± 0.16 <sup>E</sup>    | 1.31 ± 0.22 <sup>BCD</sup>   | 1.41 ± 0.10 <sup>ABC</sup>   | 1.01 ± 0.18 <sup>DE</sup>    | 1.25 ± 0.07 <sup>BCDE</sup>  | 1.35 ± 0.12 <sup>ABCD</sup>   | 1.11 ± 0.15 <sup>CDE</sup>   | 1.34 ± 0.06 <sup>BCD</sup>  |
| Arg                                 | 0.109 ± 0.014 <sup>AB</sup> | 0.075 ± 0.006 <sup>CD</sup>  | 0.071 ± 0.007 <sup>CD</sup> | 0.084 ± 0.014 <sup>BCD</sup> | 0.107 ± 0.002 <sup>AB</sup>  | 0.065 ± 0.006 <sup>D</sup>   | 0.084 ± 0.007 <sup>BCD</sup> | 0.111 ± 0.009 <sup>AB</sup>   | 0.096 ± 0.013 <sup>ABC</sup> | 0.126 ± 0.019 <sup>A</sup>  |
| Asn                                 | 0.113 ± 0.019 <sup>AB</sup> | 0.118 ± 0.014 <sup>AB</sup>  | 0.114 ± 0.012 <sup>AB</sup> | 0.110 ± 0.005 <sup>ABC</sup> | 0.127 ± 0.007 <sup>A</sup>   | 0.091 ± 0.008 <sup>BCD</sup> | 0.078 ± 0.010 <sup>CD</sup>  | 0.090 ± 0.012 <sup>BCD</sup>  | 0.076 ± 0.012 <sup>D</sup>   | 0.114 ± 0.014 <sup>AB</sup> |
| Asp                                 | 0.80 ± 0.06 <sup>BCD</sup>  | 0.95 ± 0.07 <sup>A</sup>     | 0.96 ± 0.04 <sup>A</sup>    | 0.97 ± 0.04 <sup>A</sup>     | 0.86 ± 0.05 <sup>ABC</sup>   | 0.93 ± 0.03 <sup>AB</sup>    | 0.75 ± 0.05 <sup>CD</sup>    | 0.72 ± 0.03 <sup>D</sup>      | 0.74 ± 0.03 <sup>CD</sup>    | 0.78 ± 0.05 <sup>CD</sup>   |
| Cys                                 | 0.010 ± 0.001 <sup>A</sup>  | 0.007 ± 0.001 <sup>CD</sup>  | 0.007 ± 0.001 <sup>CD</sup> | 0.004 ± 0.001 <sup>D</sup>   | 0.007 ± 0.001 <sup>ABC</sup> | 0.008 ± 0.001 <sup>ABC</sup> | 0.007 ± 0.001 <sup>BCD</sup> | 0.007 ± 0.001 <sup>ABCD</sup> | 0.006 ± 0.002 <sup>CD</sup>  | 0.010 ± 0.001 <sup>AB</sup> |
| Gln                                 | 1.16 ± 0.12 <sup>BC</sup>   | 1.30 ± 0.10 <sup>B</sup>     | 1.88 ± 0.22 <sup>A</sup>    | 1.14 ± 0.09 <sup>BCD</sup>   | 1.13 ± 0.03 <sup>BCD</sup>   | 0.81 ± 0.07 <sup>DE</sup>    | 0.66 ± 0.09 <sup>E</sup>     | 0.70 ± 0.10 <sup>E</sup>      | 0.63 ± 0.06 <sup>E</sup>     | 0.94 ± 0.16 <sup>CDE</sup>  |
| Glu                                 | 4.66 ± 0.72 <sup>C</sup>    | 6.07 ± 0.39 <sup>ABC</sup>   | 5.71 ± 0.45 <sup>ABC</sup>  | 7.03 ± 0.44 <sup>A</sup>     | 6.17 ± 0.54 <sup>ABC</sup>   | 6.67 ± 0.47 <sup>AB</sup>    | 5.81 ± 0.68 <sup>ABC</sup>   | 4.55 ± 0.30 <sup>C</sup>      | 5.69 ± 0.80 <sup>ABC</sup>   | 5.14 ± 0.77 <sup>BC</sup>   |
| Gly                                 | 0.23 ± 0.03 <sup>BC</sup>   | 0.37 ± 0.03 <sup>A</sup>     | 0.23 ± 0.03 <sup>BC</sup>   | 0.24 ± 0.04 <sup>BC</sup>    | 0.27 ± 0.02 <sup>B</sup>     | 0.19 ± 0.01 <sup>C</sup>     | 0.21 ± 0.04 <sup>BC</sup>    | 0.19 ± 0.02 <sup>BC</sup>     | 0.17 ± 0.01 <sup>C</sup>     | 0.24 ± 0.03 <sup>BC</sup>   |
| His                                 | 0.062 ± 0.002 <sup>A</sup>  | 0.049 ± 0.002 <sup>B</sup>   | 0.039 ± 0.002 <sup>CD</sup> | 0.040 ± 0.004 <sup>BCD</sup> | 0.040 ± 0.002 <sup>CD</sup>  | 0.032 ± 0.002 <sup>D</sup>   | 0.034 ± 0.003 <sup>D</sup>   | 0.044 ± 0.002 <sup>BC</sup>   | 0.040 ± 0.003 <sup>BCD</sup> | 0.058 ± 0.007 <sup>A</sup>  |
| Ile                                 | 0.176 ± 0.005 <sup>A</sup>  | 0.068 ± 0.005 <sup>DEF</sup> | 0.043 ± 0.004 <sup>F</sup>  | 0.079 ± 0.018 <sup>CDE</sup> | 0.099 ± 0.004 <sup>C</sup>   | 0.063 ± 0.007 <sup>EF</sup>  | 0.094 ± 0.005 <sup>CD</sup>  | 0.138 ± 0.005 <sup>B</sup>    | 0.100 ± 0.02 <sup>C</sup>    | 0.155 ± 0.013 <sup>AB</sup> |
| Leu                                 | 0.305 ± 0.004 <sup>A</sup>  | 0.138 ± 0.008 <sup>CDE</sup> | 0.085 ± 0.011 <sup>E</sup>  | 0.142 ± 0.035 <sup>CD</sup>  | 0.184 ± 0.007 <sup>C</sup>   | 0.106 ± 0.016 <sup>DE</sup>  | 0.172 ± 0.009 <sup>C</sup>   | 0.249 ± 0.011 <sup>B</sup>    | 0.186 ± 0.035 <sup>B</sup>   | 0.277 ± 0.022 <sup>AB</sup> |
| Lys                                 | 0.31 ± 0.01 <sup>A</sup>    | 0.22 ± 0.01 <sup>BC</sup>    | 0.10 ± 0.02 <sup>E</sup>    | 0.17 ± 0.04 <sup>CD</sup>    | 0.21 ± 0.01 <sup>BC</sup>    | 0.13 ± 0.02 <sup>DE</sup>    | 0.21 ± 0.01 <sup>C</sup>     | 0.27 ± 0.01 <sup>AB</sup>     | 0.22 ± 0.04 <sup>BC</sup>    | 0.30 ± 0.03 <sup>A</sup>    |
| Met                                 | 0.070 ± 0.002 <sup>A</sup>  | 0.046 ± 0.003 <sup>CDE</sup> | 0.032 ± 0.003 <sup>F</sup>  | 0.047 ± 0.007 <sup>CD</sup>  | 0.050 ± 0.002 <sup>CD</sup>  | 0.034 ± 0.003 <sup>EF</sup>  | 0.047 ± 0.003 <sup>CD</sup>  | 0.058 ± 0.003 <sup>BC</sup>   | 0.045 ± 0.007 <sup>DE</sup>  | 0.063 ± 0.005 <sup>AB</sup> |
| Phe                                 | 0.215 ± 0.005 <sup>A</sup>  | 0.126 ± 0.007 <sup>DE</sup>  | 0.086 ± 0.008 <sup>F</sup>  | 0.117 ± 0.021 <sup>DEF</sup> | 0.143 ± 0.005 <sup>CD</sup>  | 0.093 ± 0.011 <sup>EF</sup>  | 0.135 ± 0.006 <sup>D</sup>   | 0.177 ± 0.006 <sup>BC</sup>   | 0.129 ± 0.024 <sup>D</sup>   | 0.191 ± 0.011 <sup>AB</sup> |
| Pro                                 | 0.54 ± 0.02 <sup>A</sup>    | 0.32 ± 0.03 <sup>C</sup>     | 0.44 ± 0.03 <sup>B</sup>    | 0.51 ± 0.04 <sup>AB</sup>    | 0.51 ± 0.04 <sup>AB</sup>    | 0.46 ± 0.05 <sup>AB</sup>    | 0.45 ± 0.04 <sup>AB</sup>    | 0.47 ± 0.03 <sup>AB</sup>     | 0.44 ± 0.03 <sup>B</sup>     | 0.48 ± 0.03 <sup>AB</sup>   |
| Ser                                 | 0.59 ± 0.05 <sup>A</sup>    | 0.38 ± 0.04 <sup>BC</sup>    | 0.40 ± 0.04 <sup>BC</sup>   | 0.30 ± 0.02 <sup>CD</sup>    | 0.38 ± 0.03 <sup>BC</sup>    | 0.24 ± 0.02 <sup>D</sup>     | 0.29 ± 0.02 <sup>CD</sup>    | 0.44 ± 0.05 <sup>B</sup>      | 0.34 ± 0.06 <sup>BCD</sup>   | 0.42 ± 0.04 <sup>B</sup>    |
| Thr                                 | 0.86 ± 0.05 <sup>A</sup>    | 0.33 ± 0.03 <sup>C</sup>     | 0.35 ± 0.04 <sup>C</sup>    | 0.58 ± 0.06 <sup>B</sup>     | 0.83 ± 0.09 <sup>A</sup>     | 0.65 ± 0.06 <sup>B</sup>     | 0.72 ± 0.05 <sup>AB</sup>    | 0.74 ± 0.07 <sup>AB</sup>     | 0.36 ± 0.05 <sup>C</sup>     | 0.84 ± 0.07 <sup>A</sup>    |
| Trp                                 | 0.029 ± 0.001 <sup>A</sup>  | 0.017 ± 0.001 <sup>BCD</sup> | 0.011 ± 0.001 <sup>E</sup>  | 0.016 ± 0.003 <sup>CDE</sup> | 0.020 ± 0.001 <sup>BC</sup>  | 0.012 ± 0.001 <sup>DE</sup>  | 0.017 ± 0.002 <sup>BCD</sup> | 0.023 ± 0.001 <sup>B</sup>    | 0.020 ± 0.004 <sup>BC</sup>  | 0.030 ± 0.003 <sup>A</sup>  |
| Tyr                                 | 0.095 ± 0.004 <sup>A</sup>  | 0.047 ± 0.001 <sup>C</sup>   | 0.025 ± 0.004 <sup>E</sup>  | 0.040 ± 0.008 <sup>CD</sup>  | 0.051 ± 0.002 <sup>C</sup>   | 0.032 ± 0.005 <sup>DE</sup>  | 0.048 ± 0.002 <sup>C</sup>   | 0.069 ± 0.003 <sup>B</sup>    | 0.053 ± 0.009 <sup>C</sup>   | 0.082 ± 0.005 <sup>AB</sup> |
| Val                                 | 0.254 ± 0.006 <sup>A</sup>  | 0.117 ± 0.007 <sup>DE</sup>  | 0.086 ± 0.007 <sup>E</sup>  | 0.124 ± 0.020 <sup>CD</sup>  | 0.136 ± 0.005 <sup>CD</sup>  | 0.111 ± 0.008 <sup>DE</sup>  | 0.135 ± 0.010 <sup>CD</sup>  | 0.191 ± 0.006 <sup>B</sup>    | 0.155 ± 0.019 <sup>C</sup>   | 0.225 ± 0.018 <sup>AB</sup> |
| Asp-derived <sup>a</sup>            | 1.41 ± 0.05 <sup>A</sup>    | 0.66 ± 0.03 <sup>DE</sup>    | 0.54 ± 0.06 <sup>E</sup>    | 0.87 ± 0.11 <sup>CD</sup>    | 1.19 ± 0.10 <sup>AB</sup>    | 0.88 ± 0.08 <sup>CD</sup>    | 1.07 ± 0.06 <sup>BC</sup>    | 1.21 ± 0.09 <sup>AB</sup>     | 0.73 ± 0.12 <sup>DE</sup>    | 1.36 ± 0.11 <sup>A</sup>    |
| Total <sup>b</sup>                  | 12.3 ± 0.7 <sup>AB</sup>    | 12.3 ± 0.5 <sup>AB</sup>     | 11.7 ± 0.8 <sup>AB</sup>    | 13.0 ± 0.6 <sup>A</sup>      | 12.7 ± 0.8 <sup>AB</sup>     | 11.7 ± 0.4 <sup>AB</sup>     | 11.2 ± 1.0 <sup>AB</sup>     | 10.6 ± 0.5 <sup>B</sup>       | 10.6 ± 1.0 <sup>B</sup>      | 11.8 ± 1.2 <sup>AB</sup>    |

<sup>a</sup>Asp-derived amino acids refer to the total amount of Ile, Lys, Met, and Thr.

<sup>b</sup>Total amino acids refer to the total amount of 20 standard amino acids in this table.

**Supplemental Table S4.** Leaf free amino acid contents in three-week-old plants

Data are presented as mean  $\pm$  SE (n = 5). Values not connected by the same letter are significantly different (Student's *t*-test, *p* < 0.05). Values connected by the same letter are not significantly different.

| Amino acid (μmol/g FW)   | Col WT                           | <i>ak1-1</i>                     | <i>ak2-1</i>                     | <i>ak3-1</i>                     | <i>ak-hsdh1-1</i>                | <i>ak-hsdh2-1</i>              | <i>ak-hsdh2-2</i>               | <i>ak-hsdh2-1 ak1-1</i>         | <i>ak-hsdh2-1 ak2-1</i>         | <i>ak-hsdh2-1 ak3-1</i>          |
|--------------------------|----------------------------------|----------------------------------|----------------------------------|----------------------------------|----------------------------------|--------------------------------|---------------------------------|---------------------------------|---------------------------------|----------------------------------|
| Ala                      | 0.93 $\pm$ 0.05 <sup>EF</sup>    | 1.86 $\pm$ 0.32 <sup>AB</sup>    | 1.93 $\pm$ 0.19 <sup>A</sup>     | 1.63 $\pm$ 0.17 <sup>ABC</sup>   | 1.39 $\pm$ 0.07 <sup>BCDE</sup>  | 1.43 $\pm$ 0.01 <sup>BCD</sup> | 1.69 $\pm$ 0.29 <sup>ABC</sup>  | 1.28 $\pm$ 0.10 <sup>CDEF</sup> | 0.86 $\pm$ 0.12 <sup>F</sup>    | 1.10 $\pm$ 0.08 <sup>DEF</sup>   |
| Arg                      | 0.18 $\pm$ 0.03 <sup>B</sup>     | 0.23 $\pm$ 0.04 <sup>AB</sup>    | 0.20 $\pm$ 0.02 <sup>B</sup>     | 0.19 $\pm$ 0.03 <sup>B</sup>     | 0.18 $\pm$ 0.01 <sup>B</sup>     | 0.23 $\pm$ 0.05 <sup>AB</sup>  | 0.18 $\pm$ 0.03 <sup>B</sup>    | 0.20 $\pm$ 0.02 <sup>B</sup>    | 0.31 $\pm$ 0.03 <sup>A</sup>    | 0.20 $\pm$ 0.02 <sup>B</sup>     |
| Asn                      | 0.18 $\pm$ 0.02 <sup>B</sup>     | 0.25 $\pm$ 0.02 <sup>AB</sup>    | 0.22 $\pm$ 0.01 <sup>AB</sup>    | 0.23 $\pm$ 0.01 <sup>AB</sup>    | 0.28 $\pm$ 0.04 <sup>A</sup>     | 0.28 $\pm$ 0.05 <sup>A</sup>   | 0.23 $\pm$ 0.03 <sup>AB</sup>   | 0.20 $\pm$ 0.02 <sup>B</sup>    | 0.20 $\pm$ 0.00 <sup>B</sup>    | 0.20 $\pm$ 0.01 <sup>B</sup>     |
| Asp                      | 0.97 $\pm$ 0.13 <sup>B</sup>     | 1.07 $\pm$ 0.08 <sup>AB</sup>    | 0.98 $\pm$ 0.06 <sup>B</sup>     | 1.19 $\pm$ 0.06 <sup>AB</sup>    | 1.33 $\pm$ 0.06 <sup>AB</sup>    | 1.19 $\pm$ 0.23 <sup>AB</sup>  | 1.64 $\pm$ 0.56 <sup>A</sup>    | 1.15 $\pm$ 0.06 <sup>AB</sup>   | 1.09 $\pm$ 0.04 <sup>AB</sup>   | 0.95 $\pm$ 0.05 <sup>B</sup>     |
| Cys                      | 0.006 $\pm$ 0.000 <sup>CDE</sup> | 0.009 $\pm$ 0.001 <sup>BC</sup>  | 0.009 $\pm$ 0.001 <sup>BCD</sup> | 0.008 $\pm$ 0.001 <sup>BCD</sup> | 0.010 $\pm$ 0.001 <sup>AB</sup>  | 0.013 $\pm$ 0.002 <sup>A</sup> | 0.009 $\pm$ 0.002 <sup>B</sup>  | 0.005 $\pm$ 0.000 <sup>DE</sup> | 0.003 $\pm$ 0.001 <sup>E</sup>  | 0.008 $\pm$ 0.002 <sup>BCD</sup> |
| Gln                      | 2.38 $\pm$ 0.24 <sup>C</sup>     | 3.60 $\pm$ 0.27 <sup>ABC</sup>   | 2.85 $\pm$ 0.13 <sup>BC</sup>    | 3.46 $\pm$ 0.19 <sup>ABC</sup>   | 3.92 $\pm$ 0.28 <sup>AB</sup>    | 3.98 $\pm$ 0.75 <sup>AB</sup>  | 4.40 $\pm$ 1.04 <sup>A</sup>    | 3.02 $\pm$ 0.29 <sup>BC</sup>   | 2.54 $\pm$ 0.32 <sup>C</sup>    | 2.42 $\pm$ 0.16 <sup>C</sup>     |
| Glu                      | 6.00 $\pm$ 0.51 <sup>ABC</sup>   | 4.24 $\pm$ 0.72 <sup>BC</sup>    | 4.12 $\pm$ 0.56 <sup>C</sup>     | 4.26 $\pm$ 0.64 <sup>BC</sup>    | 3.35 $\pm$ 0.53 <sup>C</sup>     | 7.35 $\pm$ 2.17 <sup>A</sup>   | 5.38 $\pm$ 1.13 <sup>ABC</sup>  | 7.11 $\pm$ 0.55 <sup>A</sup>    | 5.63 $\pm$ 0.69 <sup>ABC</sup>  | 6.88 $\pm$ 0.55 <sup>AB</sup>    |
| Gly                      | 0.26 $\pm$ 0.01 <sup>C</sup>     | 0.42 $\pm$ 0.08 <sup>BC</sup>    | 0.48 $\pm$ 0.03 <sup>ABC</sup>   | 0.36 $\pm$ 0.03 <sup>BC</sup>    | 0.43 $\pm$ 0.06 <sup>BC</sup>    | 0.68 $\pm$ 0.20 <sup>A</sup>   | 0.49 $\pm$ 0.07 <sup>AB</sup>   | 0.46 $\pm$ 0.06 <sup>ABC</sup>  | 0.28 $\pm$ 0.01 <sup>BC</sup>   | 0.43 $\pm$ 0.04 <sup>BC</sup>    |
| His                      | 0.055 $\pm$ 0.002 <sup>C</sup>   | 0.088 $\pm$ 0.004 <sup>B</sup>   | 0.091 $\pm$ 0.006 <sup>B</sup>   | 0.098 $\pm$ 0.006 <sup>AB</sup>  | 0.098 $\pm$ 0.006 <sup>AB</sup>  | 0.110 $\pm$ 0.014 <sup>A</sup> | 0.096 $\pm$ 0.009 <sup>AB</sup> | 0.065 $\pm$ 0.004 <sup>C</sup>  | 0.064 $\pm$ 0.002 <sup>C</sup>  | 0.058 $\pm$ 0.004 <sup>C</sup>   |
| Ile                      | 0.060 $\pm$ 0.002 <sup>D</sup>   | 0.123 $\pm$ 0.007 <sup>C</sup>   | 0.157 $\pm$ 0.018 <sup>BC</sup>  | 0.177 $\pm$ 0.007 <sup>AB</sup>  | 0.181 $\pm$ 0.006 <sup>AB</sup>  | 0.196 $\pm$ 0.003 <sup>A</sup> | 0.151 $\pm$ 0.017 <sup>BC</sup> | 0.071 $\pm$ 0.006 <sup>D</sup>  | 0.057 $\pm$ 0.002 <sup>D</sup>  | 0.079 $\pm$ 0.004 <sup>D</sup>   |
| Leu                      | 0.095 $\pm$ 0.005 <sup>C</sup>   | 0.253 $\pm$ 0.012 <sup>B</sup>   | 0.308 $\pm$ 0.027 <sup>B</sup>   | 0.319 $\pm$ 0.015 <sup>B</sup>   | 0.317 $\pm$ 0.024 <sup>B</sup>   | 0.400 $\pm$ 0.068 <sup>A</sup> | 0.314 $\pm$ 0.034 <sup>B</sup>  | 0.125 $\pm$ 0.004 <sup>C</sup>  | 0.117 $\pm$ 0.008 <sup>C</sup>  | 0.126 $\pm$ 0.009 <sup>C</sup>   |
| Lys                      | 0.11 $\pm$ 0.01 <sup>C</sup>     | 0.26 $\pm$ 0.02 <sup>B</sup>     | 0.30 $\pm$ 0.03 <sup>B</sup>     | 0.31 $\pm$ 0.02 <sup>AB</sup>    | 0.34 $\pm$ 0.04 <sup>AB</sup>    | 0.41 $\pm$ 0.08 <sup>A</sup>   | 0.35 $\pm$ 0.04 <sup>AB</sup>   | 0.13 $\pm$ 0.01 <sup>C</sup>    | 0.13 $\pm$ 0.01 <sup>C</sup>    | 0.14 $\pm$ 0.01 <sup>C</sup>     |
| Met                      | 0.036 $\pm$ 0.004 <sup>D</sup>   | 0.073 $\pm$ 0.007 <sup>ABC</sup> | 0.085 $\pm$ 0.010 <sup>AB</sup>  | 0.086 $\pm$ 0.008 <sup>A</sup>   | 0.074 $\pm$ 0.005 <sup>ABC</sup> | 0.090 $\pm$ 0.02 <sup>A</sup>  | 0.095 $\pm$ 0.024 <sup>A</sup>  | 0.048 $\pm$ 0.003 <sup>CD</sup> | 0.044 $\pm$ 0.003 <sup>CD</sup> | 0.053 $\pm$ 0.003 <sup>BCD</sup> |
| Phe                      | 0.086 $\pm$ 0.004 <sup>C</sup>   | 0.212 $\pm$ 0.006 <sup>B</sup>   | 0.252 $\pm$ 0.016 <sup>B</sup>   | 0.260 $\pm$ 0.011 <sup>AB</sup>  | 0.262 $\pm$ 0.013 <sup>AB</sup>  | 0.305 $\pm$ 0.046 <sup>A</sup> | 0.249 $\pm$ 0.022 <sup>B</sup>  | 0.099 $\pm$ 0.005 <sup>C</sup>  | 0.096 $\pm$ 0.004 <sup>C</sup>  | 0.100 $\pm$ 0.006 <sup>C</sup>   |
| Pro                      | 0.55 $\pm$ 0.04 <sup>B</sup>     | 0.69 $\pm$ 0.04 <sup>AB</sup>    | 0.75 $\pm$ 0.07 <sup>AB</sup>    | 0.70 $\pm$ 0.05 <sup>AB</sup>    | 0.65 $\pm$ 0.02 <sup>B</sup>     | 0.70 $\pm$ 0.02 <sup>AB</sup>  | 0.87 $\pm$ 0.18 <sup>A</sup>    | 0.67 $\pm$ 0.04 <sup>AB</sup>   | 0.62 $\pm$ 0.07 <sup>B</sup>    | 0.65 $\pm$ 0.06 <sup>B</sup>     |
| Ser                      | 0.49 $\pm$ 0.06 <sup>D</sup>     | 1.19 $\pm$ 0.13 <sup>AB</sup>    | 1.05 $\pm$ 0.15 <sup>ABC</sup>   | 1.14 $\pm$ 0.11 <sup>AB</sup>    | 1.45 $\pm$ 0.12 <sup>A</sup>     | 1.04 $\pm$ 0.15 <sup>BC</sup>  | 1.06 $\pm$ 0.30 <sup>ABC</sup>  | 0.85 $\pm$ 0.09 <sup>BCD</sup>  | 0.69 $\pm$ 0.09 <sup>CD</sup>   | 0.50 $\pm$ 0.04 <sup>D</sup>     |
| Thr                      | 0.69 $\pm$ 0.04 <sup>CDE</sup>   | 0.55 $\pm$ 0.05 <sup>DEF</sup>   | 0.52 $\pm$ 0.05 <sup>EF</sup>    | 0.90 $\pm$ 0.05 <sup>BCD</sup>   | 1.11 $\pm$ 0.08 <sup>AB</sup>    | 1.48 $\pm$ 0.28 <sup>A</sup>   | 1.15 $\pm$ 0.25 <sup>AB</sup>   | 0.59 $\pm$ 0.08 <sup>CDEF</sup> | 0.22 $\pm$ 0.02 <sup>F</sup>    | 0.94 $\pm$ 0.08 <sup>BC</sup>    |
| Trp                      | 0.013 $\pm$ 0.000 <sup>C</sup>   | 0.034 $\pm$ 0.001 <sup>B</sup>   | 0.038 $\pm$ 0.003 <sup>B</sup>   | 0.042 $\pm$ 0.003 <sup>AB</sup>  | 0.042 $\pm$ 0.003 <sup>AB</sup>  | 0.051 $\pm$ 0.009 <sup>A</sup> | 0.044 $\pm$ 0.006 <sup>AB</sup> | 0.018 $\pm$ 0.001 <sup>C</sup>  | 0.015 $\pm$ 0.001 <sup>C</sup>  | 0.017 $\pm$ 0.001 <sup>C</sup>   |
| Tyr                      | 0.025 $\pm$ 0.002 <sup>B</sup>   | 0.068 $\pm$ 0.007 <sup>A</sup>   | 0.078 $\pm$ 0.010 <sup>A</sup>   | 0.089 $\pm$ 0.005 <sup>A</sup>   | 0.079 $\pm$ 0.005 <sup>A</sup>   | 0.090 $\pm$ 0.019 <sup>A</sup> | 0.095 $\pm$ 0.025 <sup>A</sup>  | 0.033 $\pm$ 0.003 <sup>B</sup>  | 0.029 $\pm$ 0.001 <sup>B</sup>  | 0.034 $\pm$ 0.002 <sup>B</sup>   |
| Val                      | 0.11 $\pm$ 0.00 <sup>D</sup>     | 0.20 $\pm$ 0.02 <sup>ABC</sup>   | 0.21 $\pm$ 0.03 <sup>AB</sup>    | 0.23 $\pm$ 0.01 <sup>A</sup>     | 0.20 $\pm$ 0.01 <sup>ABC</sup>   | 0.26 $\pm$ 0.06 <sup>A</sup>   | 0.24 $\pm$ 0.06 <sup>A</sup>    | 0.13 $\pm$ 0.01 <sup>CD</sup>   | 0.11 $\pm$ 0.01 <sup>D</sup>    | 0.13 $\pm$ 0.01 <sup>BCD</sup>   |
| Asp-derived <sup>a</sup> | 0.90 $\pm$ 0.05 <sup>EF</sup>    | 1.00 $\pm$ 0.07 <sup>DE</sup>    | 1.06 $\pm$ 0.09 <sup>DE</sup>    | 1.48 $\pm$ 0.06 <sup>BCD</sup>   | 1.70 $\pm$ 0.10 <sup>ABC</sup>   | 2.17 $\pm$ 0.41 <sup>A</sup>   | 1.75 $\pm$ 0.32 <sup>AB</sup>   | 0.84 $\pm$ 0.09 <sup>EF</sup>   | 0.45 $\pm$ 0.02 <sup>F</sup>    | 1.21 $\pm$ 0.09 <sup>CDE</sup>   |
| Total <sup>b</sup>       | 13.2 $\pm$ 1.0 <sup>B</sup>      | 15.4 $\pm$ 1.5 <sup>AB</sup>     | 14.6 $\pm$ 0.8 <sup>AB</sup>     | 15.7 $\pm$ 0.8 <sup>AB</sup>     | 15.7 $\pm$ 0.7 <sup>AB</sup>     | 20.3 $\pm$ 4.0 <sup>A</sup>    | 18.7 $\pm$ 4.0 <sup>AB</sup>    | 16.2 $\pm$ 1.2 <sup>AB</sup>    | 13.1 $\pm$ 1.0 <sup>B</sup>     | 15.0 $\pm$ 0.8 <sup>AB</sup>     |

<sup>a</sup>Asp-derived amino acids refer to the total amount of Ile, Lys, Met, and Thr.

<sup>b</sup>Total amino acids refer to the total amount of 20 standard amino acids in this table.

**Supplemental Table S5.** Correlation coefficients and *p* values among transcript levels, AK activity, HSDH activity, free amino acid contents, and protein-bound amino acid contents and their ratios

Ten data points were used for Pearson's correlation analysis; each data point represents one genotype. Negligible or very weak ( $0 \leq |r| < 0.20$ ) and weak ( $0.20 \leq |r| < 0.40$ ) correlations are not bolded. Moderate ( $0.40 \leq |r| < 0.70$ ), strong ( $0.70 \leq |r| < 0.90$ ), and very strong ( $0.90 \leq |r| \leq 1.00$ ) correlations are in bold. To dissect the AK activity from Lys-sensitive mono-functional AKs and that from Thr-sensitive dual-functional AK-HSDHs, we measured the overall AK activity in 0 mM Lys + 0 mM Thr, 0 mM Lys + 20 mM Thr, 20 mM Lys + 0 mM Thr, and 20 mM Lys + 20 mM Thr. In the presence of 20 mM Lys, the overall AK activity is expected to be solely contributed by the two AK-HSDHs; in the presence of 20 mM Thr, the overall AK activity is anticipated to be exclusively contributed by the three AKs; in the presence 20 mM Lys and Thr, the AK activity from both AKs and AK-HSDHs are expected to be abolished.

| Variable                            | by Variable                             | Correlation coefficient <i>r</i> | <i>p</i> value |
|-------------------------------------|-----------------------------------------|----------------------------------|----------------|
| <i>(AK-HSDHs+CGS1)/SAMSs</i>        | <i>(AKs+AK-HSDHs)/AK-HSDHs</i>          | 0.2912                           | 0.4143         |
| <b><i>(AK-HSDHs+CGS1)/SAMSs</i></b> | <b><i>(AKs+AK-HSDHs+CGS1)/SAMSs</i></b> | <b>0.5564</b>                    | <b>0.0948</b>  |
| <i>(AK-HSDHs+CGS1)/SAMSs</i>        | <i>(AKs+AK-HSDHs+DHDPSs)/LKR-SDHI</i>   | 0.1926                           | 0.5940         |
| <i>(AK-HSDHs+CGS1)/SAMSs</i>        | <i>(AKs+DHDPSs)/LKR-SDHI</i>            | 0.2721                           | 0.4469         |
| <b><i>(AK-HSDHs+CGS1)/SAMSs</i></b> | <b>AK1</b>                              | <b>-0.4791</b>                   | <b>0.1613</b>  |
| <i>(AK-HSDHs+CGS1)/SAMSs</i>        | AK1+AK2                                 | 0.2967                           | 0.4051         |
| <b><i>(AK-HSDHs+CGS1)/SAMSs</i></b> | <b>AK1+AK3</b>                          | <b>-0.4634</b>                   | <b>0.1774</b>  |
| <i>(AK-HSDHs+CGS1)/SAMSs</i>        | AK2                                     | 0.3855                           | 0.2713         |
| <i>(AK-HSDHs+CGS1)/SAMSs</i>        | AK2+AK3                                 | 0.3697                           | 0.2931         |
| <i>(AK-HSDHs+CGS1)/SAMSs</i>        | AK3                                     | -0.0231                          | 0.9495         |
| <i>(AK-HSDHs+CGS1)/SAMSs</i>        | AK-HSDH1                                | -0.1198                          | 0.7417         |
| <i>(AK-HSDHs+CGS1)/SAMSs</i>        | AK-HSDH2                                | -0.1667                          | 0.6453         |
| <i>(AK-HSDHs+CGS1)/SAMSs</i>        | AK-HSDHs                                | -0.1732                          | 0.6323         |
| <i>(AK-HSDHs+CGS1)/SAMSs</i>        | AK-HSDHs+CGS1                           | -0.0018                          | 0.9960         |
| <i>(AK-HSDHs+CGS1)/SAMSs</i>        | AK-HSDHs+TS1                            | -0.1083                          | 0.7659         |
| <i>(AK-HSDHs+CGS1)/SAMSs</i>        | AK-HSDHs+TS1+TD1                        | -0.1371                          | 0.7058         |
| <i>(AK-HSDHs+CGS1)/SAMSs</i>        | AK-HSDHs+TS1+THAs                       | -0.0973                          | 0.7892         |
| <i>(AK-HSDHs+CGS1)/SAMSs</i>        | AKs                                     | 0.2864                           | 0.4223         |
| <i>(AK-HSDHs+CGS1)/SAMSs</i>        | AKs/AK-HSDHs                            | 0.2912                           | 0.4143         |
| <i>(AK-HSDHs+CGS1)/SAMSs</i>        | AKs+AK-HSDHs                            | 0.2507                           | 0.4848         |
| <i>(AK-HSDHs+CGS1)/SAMSs</i>        | AKs+AK-HSDHs+CGS1                       | 0.2797                           | 0.4339         |
| <i>(AK-HSDHs+CGS1)/SAMSs</i>        | AKs+AK-HSDHs+DHDPSs                     | 0.2319                           | 0.5191         |
| <i>(AK-HSDHs+CGS1)/SAMSs</i>        | AKs+AK-HSDHs+TS1                        | 0.1674                           | 0.6439         |
| <i>(AK-HSDHs+CGS1)/SAMSs</i>        | AKs+AK-HSDHs+TS1+TD1                    | 0.1379                           | 0.7040         |
| <i>(AK-HSDHs+CGS1)/SAMSs</i>        | AKs+AK-HSDHs+TS1+THAs                   | 0.1724                           | 0.6339         |
| <i>(AK-HSDHs+CGS1)/SAMSs</i>        | AKs+DHDPSs                              | 0.2689                           | 0.4526         |
| <i>(AK-HSDHs+CGS1)/SAMSs</i>        | BCAT1                                   | 0.1099                           | 0.7624         |
| <i>(AK-HSDHs+CGS1)/SAMSs</i>        | Biosynthetic genes analyzed             | 0.1702                           | 0.6383         |
| <b><i>(AK-HSDHs+CGS1)/SAMSs</i></b> | <b>Catabolic genes analyzed</b>         | <b>-0.5411</b>                   | <b>0.1063</b>  |
| <i>(AK-HSDHs+CGS1)/SAMSs</i>        | CGS1                                    | 0.1800                           | 0.6189         |
| <i>(AK-HSDHs+CGS1)/SAMSs</i>        | DHDPS1                                  | -0.2646                          | 0.4600         |
| <i>(AK-HSDHs+CGS1)/SAMSs</i>        | DHDPS2                                  | -0.3314                          | 0.3495         |
| <b><i>(AK-HSDHs+CGS1)/SAMSs</i></b> | <b>DHDPSs</b>                           | <b>-0.4230</b>                   | <b>0.2232</b>  |
| <i>(AK-HSDHs+CGS1)/SAMSs</i>        | DHDPSs/LKR-SDHI                         | -0.2546                          | 0.4777         |
| <i>(AK-HSDHs+CGS1)/SAMSs</i>        | LKR-SDHI                                | 0.0890                           | 0.8069         |
| <i>(AK-HSDHs+CGS1)/SAMSs</i>        | SAMS1                                   | -0.3500                          | 0.3215         |
| <i>(AK-HSDHs+CGS1)/SAMSs</i>        | SAMS2                                   | -0.2300                          | 0.5226         |
| <b><i>(AK-HSDHs+CGS1)/SAMSs</i></b> | <b>SAMS3</b>                            | <b>-0.4693</b>                   | <b>0.1712</b>  |
| <b><i>(AK-HSDHs+CGS1)/SAMSs</i></b> | <b>SAMS4</b>                            | <b>-0.4198</b>                   | <b>0.2272</b>  |
| <b><i>(AK-HSDHs+CGS1)/SAMSs</i></b> | <b>SAMSs</b>                            | <b>-0.5407</b>                   | <b>0.1066</b>  |
| <i>(AK-HSDHs+CGS1)/SAMSs</i>        | TD1                                     | -0.3806                          | 0.2779         |
| <i>(AK-HSDHs+CGS1)/SAMSs</i>        | THA1                                    | 0.1947                           | 0.5899         |
| <b><i>(AK-HSDHs+CGS1)/SAMSs</i></b> | <b>THA2</b>                             | <b>0.5101</b>                    | <b>0.1320</b>  |
| <b><i>(AK-HSDHs+CGS1)/SAMSs</i></b> | <b>THAs</b>                             | <b>0.4915</b>                    | <b>0.1491</b>  |

|                                         |                                              |                |                  |
|-----------------------------------------|----------------------------------------------|----------------|------------------|
| <i>(AK-HSDHs+CGS1)/SAMSs</i>            | <i>THAs+TD1</i>                              | -0.2685        | 0.4531           |
| <i>(AK-HSDHs+CGS1)/SAMSs</i>            | <i>TS1</i>                                   | -0.0630        | 0.8628           |
| <i>(AK-HSDHs+TS1)/(THAs+TD1)</i>        | <i>(AK-HSDHs+CGS1)/SAMSs</i>                 | 0.2481         | 0.4895           |
| <b><i>(AK-HSDHs+TS1)/(THAs+TD1)</i></b> | <b><i>(AKs+AK-HSDHs)/AK-HSDHs</i></b>        | <b>-0.4137</b> | <b>0.2347</b>    |
| <i>(AK-HSDHs+TS1)/(THAs+TD1)</i>        | <i>(AKs+AK-HSDHs+CGS1)/SAMSs</i>             | -0.1354        | 0.7092           |
| <b><i>(AK-HSDHs+TS1)/(THAs+TD1)</i></b> | <b><i>(AKs+AK-HSDHs+DHDPSs)/LKR-SDHI</i></b> | <b>0.5455</b>  | <b>0.1029</b>    |
| <b><i>(AK-HSDHs+TS1)/(THAs+TD1)</i></b> | <b><i>(AKs+AK-HSDHs+TS1)/(THAs+TD1)</i></b>  | <b>0.8325</b>  | <b>0.0028</b>    |
| <i>(AK-HSDHs+TS1)/(THAs+TD1)</i>        | <b><i>(AKs+DHDPSs)/LKR-SDHI</i></b>          | <b>0.4646</b>  | <b>0.1761</b>    |
| <i>(AK-HSDHs+TS1)/(THAs+TD1)</i>        | <i>AK1</i>                                   | 0.3119         | 0.3803           |
| <i>(AK-HSDHs+TS1)/(THAs+TD1)</i>        | <i>AK1+AK2</i>                               | -0.1100        | 0.7623           |
| <i>(AK-HSDHs+TS1)/(THAs+TD1)</i>        | <i>AK1+AK3</i>                               | 0.1653         | 0.6480           |
| <i>(AK-HSDHs+TS1)/(THAs+TD1)</i>        | <i>AK2</i>                                   | -0.1716        | 0.6355           |
| <i>(AK-HSDHs+TS1)/(THAs+TD1)</i>        | <i>AK2+AK3</i>                               | -0.1911        | 0.5969           |
| <i>(AK-HSDHs+TS1)/(THAs+TD1)</i>        | <i>AK3</i>                                   | -0.1530        | 0.6731           |
| <b><i>(AK-HSDHs+TS1)/(THAs+TD1)</i></b> | <b><i>AK-HSDHI</i></b>                       | <b>0.6146</b>  | <b>0.0586</b>    |
| <i>(AK-HSDHs+TS1)/(THAs+TD1)</i>        | <i>AK-HSDH2</i>                              | 0.0736         | 0.8399           |
| <i>(AK-HSDHs+TS1)/(THAs+TD1)</i>        | <i>AK-HSDHs</i>                              | 0.3937         | 0.2603           |
| <i>(AK-HSDHs+TS1)/(THAs+TD1)</i>        | <i>AK-HSDHs+CGS1</i>                         | 0.1991         | 0.5813           |
| <i>(AK-HSDHs+TS1)/(THAs+TD1)</i>        | <i>AK-HSDHs+TS1</i>                          | 0.1256         | 0.7295           |
| <i>(AK-HSDHs+TS1)/(THAs+TD1)</i>        | <i>AK-HSDHs+TS1+TD1</i>                      | 0.0619         | 0.8652           |
| <i>(AK-HSDHs+TS1)/(THAs+TD1)</i>        | <i>AK-HSDHs+TS1+THAs</i>                     | 0.1193         | 0.7428           |
| <i>(AK-HSDHs+TS1)/(THAs+TD1)</i>        | <i>AKs</i>                                   | -0.1355        | 0.7089           |
| <b><i>(AK-HSDHs+TS1)/(THAs+TD1)</i></b> | <b><i>AKs/AK-HSDHs</i></b>                   | <b>-0.4137</b> | <b>0.2347</b>    |
| <i>(AK-HSDHs+TS1)/(THAs+TD1)</i>        | <i>AKs+AK-HSDHs</i>                          | -0.0382        | 0.9165           |
| <i>(AK-HSDHs+TS1)/(THAs+TD1)</i>        | <i>AKs+AK-HSDHs+CGS1</i>                     | -0.0466        | 0.8983           |
| <i>(AK-HSDHs+TS1)/(THAs+TD1)</i>        | <i>AKs+AK-HSDHs+DHDPSs</i>                   | -0.0535        | 0.8832           |
| <i>(AK-HSDHs+TS1)/(THAs+TD1)</i>        | <i>AKs+AK-HSDHs+TS1</i>                      | -0.0333        | 0.9272           |
| <i>(AK-HSDHs+TS1)/(THAs+TD1)</i>        | <i>AKs+AK-HSDHs+TS1+TD1</i>                  | -0.0677        | 0.8526           |
| <i>(AK-HSDHs+TS1)/(THAs+TD1)</i>        | <i>AKs+AK-HSDHs+TS1+THAs</i>                 | -0.0369        | 0.9194           |
| <i>(AK-HSDHs+TS1)/(THAs+TD1)</i>        | <i>AKs+DHDPSs</i>                            | -0.1513        | 0.6766           |
| <b><i>(AK-HSDHs+TS1)/(THAs+TD1)</i></b> | <b><i>BCAT1</i></b>                          | <b>0.7569</b>  | <b>0.0113</b>    |
| <i>(AK-HSDHs+TS1)/(THAs+TD1)</i>        | Biosynthetic genes analyzed                  | -0.0499        | 0.8911           |
| <i>(AK-HSDHs+TS1)/(THAs+TD1)</i>        | Catabolic genes analyzed                     | -0.0157        | 0.9657           |
| <i>(AK-HSDHs+TS1)/(THAs+TD1)</i>        | <i>CGS1</i>                                  | -0.0514        | 0.8879           |
| <i>(AK-HSDHs+TS1)/(THAs+TD1)</i>        | <i>CGS1/SAMSs</i>                            | -0.1486        | 0.6819           |
| <b><i>(AK-HSDHs+TS1)/(THAs+TD1)</i></b> | <b><i>DHDPS1</i></b>                         | <b>-0.5217</b> | <b>0.1220</b>    |
| <i>(AK-HSDHs+TS1)/(THAs+TD1)</i>        | <i>DHDPS2</i>                                | -0.1490        | 0.6812           |
| <b><i>(AK-HSDHs+TS1)/(THAs+TD1)</i></b> | <b><i>DHDPSs</i></b>                         | <b>-0.4204</b> | <b>0.2264</b>    |
| <i>(AK-HSDHs+TS1)/(THAs+TD1)</i>        | <i>DHDPSs/LKR-SDHI</i>                       | 0.2574         | 0.4728           |
| <b><i>(AK-HSDHs+TS1)/(THAs+TD1)</i></b> | <b><i>LKR-SDHI</i></b>                       | <b>-0.4225</b> | <b>0.2239</b>    |
| <b><i>(AK-HSDHs+TS1)/(THAs+TD1)</i></b> | <b><i>SAMS1</i></b>                          | <b>-0.7333</b> | <b>0.0158</b>    |
| <b><i>(AK-HSDHs+TS1)/(THAs+TD1)</i></b> | <b><i>SAMS2</i></b>                          | <b>-0.6117</b> | <b>0.0602</b>    |
| <i>(AK-HSDHs+TS1)/(THAs+TD1)</i>        | <i>SAMS3</i>                                 | 0.3691         | 0.2939           |
| <i>(AK-HSDHs+TS1)/(THAs+TD1)</i>        | <i>SAMS4</i>                                 | -0.0456        | 0.9004           |
| <i>(AK-HSDHs+TS1)/(THAs+TD1)</i>        | <i>SAMSs</i>                                 | -0.0138        | 0.9697           |
| <b><i>(AK-HSDHs+TS1)/(THAs+TD1)</i></b> | <b><i>TD1</i></b>                            | <b>-0.5588</b> | <b>0.0932</b>    |
| <i>(AK-HSDHs+TS1)/(THAs+TD1)</i>        | <i>THA1</i>                                  | -0.0451        | 0.9016           |
| <i>(AK-HSDHs+TS1)/(THAs+TD1)</i>        | <i>THA2</i>                                  | -0.2945        | 0.4088           |
| <i>(AK-HSDHs+TS1)/(THAs+TD1)</i>        | <i>THAs</i>                                  | -0.3347        | 0.3445           |
| <b><i>(AK-HSDHs+TS1)/(THAs+TD1)</i></b> | <b><i>THAs+TD1</i></b>                       | <b>-0.5990</b> | <b>0.0673</b>    |
| <i>(AK-HSDHs+TS1)/(THAs+TD1)</i>        | <i>TS1</i>                                   | -0.0076        | 0.9835           |
| <b><i>(AK-HSDHs+TS1)/(THAs+TD1)</i></b> | <b><i>TS1/(THAs+TD1)</i></b>                 | <b>0.9495</b>  | <b>&lt;.0001</b> |
| <b><i>(AK-HSDHs+TS1)/(THAs+TD1)</i></b> | <b><i>TS1/TD1</i></b>                        | <b>0.9614</b>  | <b>&lt;.0001</b> |
| <i>(AK-HSDHs+TS1)/(THAs+TD1)</i>        | <i>TS1/THAs</i>                              | -0.0062        | 0.9865           |
| <i>(AK-HSDHs+TS1+TD1)/BCAT1</i>         | <i>(AK-HSDHs+CGS1)/SAMSs</i>                 | 0.2670         | 0.4559           |
| <i>(AK-HSDHs+TS1+TD1)/BCAT1</i>         | <i>(AK-HSDHs+TS1)/(THAs+TD1)</i>             | -0.1206        | 0.7400           |
| <i>(AK-HSDHs+TS1+TD1)/BCAT1</i>         | <i>(AKs+AK-HSDHs)/AK-HSDHs</i>               | -0.2184        | 0.5445           |

|                                        |                                            |                |                  |
|----------------------------------------|--------------------------------------------|----------------|------------------|
| <i>(AK-HSDHs+TS1+TD1)/BCAT1</i>        | <i>(AKs+AK-HSDHs+CGS1)/SAMSs</i>           | 0.0039         | 0.9916           |
| <i>(AK-HSDHs+TS1+TD1)/BCAT1</i>        | <i>(AKs+AK-HSDHs+DHDPSs)/LKR-SDHI</i>      | 0.2059         | 0.5682           |
| <i>(AK-HSDHs+TS1+TD1)/BCAT1</i>        | <i>(AKs+AK-HSDHs+TS1)/(THAs+TD1)</i>       | -0.1687        | 0.6412           |
| <b><i>(AK-HSDHs+TS1+TD1)/BCAT1</i></b> | <b><i>(AKs+AK-HSDHs+TS1+TD1)/BCAT1</i></b> | <b>0.9989</b>  | <b>&lt;.0001</b> |
| <i>(AK-HSDHs+TS1+TD1)/BCAT1</i>        | <i>(AKs+DHDPSs)/LKR-SDHI</i>               | 0.1986         | 0.5823           |
| <i>(AK-HSDHs+TS1+TD1)/BCAT1</i>        | <i>AK1</i>                                 | 0.0852         | 0.8150           |
| <i>(AK-HSDHs+TS1+TD1)/BCAT1</i>        | <i>AK1+AK2</i>                             | 0.1962         | 0.5869           |
| <i>(AK-HSDHs+TS1+TD1)/BCAT1</i>        | <i>AK1+AK3</i>                             | -0.3488        | 0.3232           |
| <i>(AK-HSDHs+TS1+TD1)/BCAT1</i>        | <i>AK2</i>                                 | 0.1719         | 0.6349           |
| <i>(AK-HSDHs+TS1+TD1)/BCAT1</i>        | <i>AK2+AK3</i>                             | 0.0735         | 0.8400           |
| <b><i>(AK-HSDHs+TS1+TD1)/BCAT1</i></b> | <b><i>AK3</i></b>                          | <b>-0.5361</b> | <b>0.1102</b>    |
| <i>(AK-HSDHs+TS1+TD1)/BCAT1</i>        | <i>AK-HSDH1</i>                            | 0.0317         | 0.9307           |
| <i>(AK-HSDHs+TS1+TD1)/BCAT1</i>        | <i>AK-HSDH2</i>                            | 0.3835         | 0.2740           |
| <i>(AK-HSDHs+TS1+TD1)/BCAT1</i>        | <i>AK-HSDHs</i>                            | 0.2743         | 0.4431           |
| <b><i>(AK-HSDHs+TS1+TD1)/BCAT1</i></b> | <b><i>AK-HSDHs+CGS1</i></b>                | <b>0.4394</b>  | <b>0.2038</b>    |
| <i>(AK-HSDHs+TS1+TD1)/BCAT1</i>        | <i>AK-HSDHs+TS1</i>                        | 0.3822         | 0.2757           |
| <i>(AK-HSDHs+TS1+TD1)/BCAT1</i>        | <i>AK-HSDHs+TS1+TD1</i>                    | 0.3861         | 0.2705           |
| <i>(AK-HSDHs+TS1+TD1)/BCAT1</i>        | <i>AK-HSDHs+TS1+THAs</i>                   | 0.3856         | 0.2711           |
| <i>(AK-HSDHs+TS1+TD1)/BCAT1</i>        | <i>AKs</i>                                 | 0.0951         | 0.7937           |
| <i>(AK-HSDHs+TS1+TD1)/BCAT1</i>        | <i>AKs/AK-HSDHs</i>                        | -0.2184        | 0.5445           |
| <i>(AK-HSDHs+TS1+TD1)/BCAT1</i>        | <i>AKs+AK-HSDHs</i>                        | 0.1709         | 0.6369           |
| <i>(AK-HSDHs+TS1+TD1)/BCAT1</i>        | <i>AKs+AK-HSDHs+CGS1</i>                   | 0.2836         | 0.4271           |
| <i>(AK-HSDHs+TS1+TD1)/BCAT1</i>        | <i>AKs+AK-HSDHs+DHDPSs</i>                 | 0.1882         | 0.6027           |
| <i>(AK-HSDHs+TS1+TD1)/BCAT1</i>        | <i>AKs+AK-HSDHs+TS1</i>                    | 0.3136         | 0.3776           |
| <i>(AK-HSDHs+TS1+TD1)/BCAT1</i>        | <i>AKs+AK-HSDHs+TS1+TD1</i>                | 0.3236         | 0.3617           |
| <i>(AK-HSDHs+TS1+TD1)/BCAT1</i>        | <i>AKs+AK-HSDHs+TS1+THAs</i>               | 0.3132         | 0.3782           |
| <i>(AK-HSDHs+TS1+TD1)/BCAT1</i>        | <i>AKs+DHDPSs</i>                          | 0.1148         | 0.7522           |
| <b><i>(AK-HSDHs+TS1+TD1)/BCAT1</i></b> | <b><i>BCAT1</i></b>                        | <b>-0.4809</b> | <b>0.1594</b>    |
| <i>(AK-HSDHs+TS1+TD1)/BCAT1</i>        | Biosynthetic genes analyzed                | 0.3883         | 0.2675           |
| <i>(AK-HSDHs+TS1+TD1)/BCAT1</i>        | Catabolic genes analyzed                   | 0.2132         | 0.5543           |
| <b><i>(AK-HSDHs+TS1+TD1)/BCAT1</i></b> | <b><i>CGS1</i></b>                         | <b>0.5328</b>  | <b>0.1128</b>    |
| <i>(AK-HSDHs+TS1+TD1)/BCAT1</i>        | <i>CGS1/SAMSs</i>                          | 0.0804         | 0.8253           |
| <i>(AK-HSDHs+TS1+TD1)/BCAT1</i>        | <i>DHDPS1</i>                              | 0.2954         | 0.4074           |
| <b><i>(AK-HSDHs+TS1+TD1)/BCAT1</i></b> | <b><i>DHDPS2</i></b>                       | <b>0.4690</b>  | <b>0.1715</b>    |
| <b><i>(AK-HSDHs+TS1+TD1)/BCAT1</i></b> | <b><i>DHDPSs</i></b>                       | <b>0.4815</b>  | <b>0.1589</b>    |
| <i>(AK-HSDHs+TS1+TD1)/BCAT1</i>        | <i>DHDPSs/LKR-SDHI</i>                     | 0.3612         | 0.3051           |
| <i>(AK-HSDHs+TS1+TD1)/BCAT1</i>        | <i>LKR-SDHI</i>                            | -0.2509        | 0.4845           |
| <i>(AK-HSDHs+TS1+TD1)/BCAT1</i>        | <i>SAMS1</i>                               | 0.1794         | 0.6200           |
| <i>(AK-HSDHs+TS1+TD1)/BCAT1</i>        | <i>SAMS2</i>                               | 0.2451         | 0.4949           |
| <i>(AK-HSDHs+TS1+TD1)/BCAT1</i>        | <i>SAMS3</i>                               | 0.1560         | 0.6669           |
| <i>(AK-HSDHs+TS1+TD1)/BCAT1</i>        | <i>SAMS4</i>                               | 0.1871         | 0.6047           |
| <i>(AK-HSDHs+TS1+TD1)/BCAT1</i>        | <i>SAMSs</i>                               | 0.2143         | 0.5521           |
| <i>(AK-HSDHs+TS1+TD1)/BCAT1</i>        | <i>TD1</i>                                 | 0.3218         | 0.3646           |
| <b><i>(AK-HSDHs+TS1+TD1)/BCAT1</i></b> | <b><i>TD1/BCAT1</i></b>                    | <b>0.9969</b>  | <b>&lt;.0001</b> |
| <i>(AK-HSDHs+TS1+TD1)/BCAT1</i>        | <i>THA1</i>                                | -0.2554        | 0.4763           |
| <i>(AK-HSDHs+TS1+TD1)/BCAT1</i>        | <i>THA2</i>                                | 0.2315         | 0.5198           |
| <i>(AK-HSDHs+TS1+TD1)/BCAT1</i>        | <i>THAs</i>                                | 0.2010         | 0.5776           |
| <i>(AK-HSDHs+TS1+TD1)/BCAT1</i>        | <i>THAs+TD1</i>                            | 0.3526         | 0.3176           |
| <i>(AK-HSDHs+TS1+TD1)/BCAT1</i>        | <i>TS1</i>                                 | 0.3818         | 0.2763           |
| <i>(AK-HSDHs+TS1+TD1)/BCAT1</i>        | <i>TS1/(THAs+TD1)</i>                      | -0.1577        | 0.6634           |
| <i>(AK-HSDHs+TS1+TD1)/BCAT1</i>        | <i>TS1/TD1</i>                             | -0.2444        | 0.4961           |
| <i>(AK-HSDHs+TS1+TD1)/BCAT1</i>        | <i>TS1/THAs</i>                            | 0.1459         | 0.6875           |
| <i>(AKs+AK-HSDHs)/AK-HSDHs</i>         | <i>AK1</i>                                 | -0.2304        | 0.5219           |
| <b><i>(AKs+AK-HSDHs)/AK-HSDHs</i></b>  | <b><i>AK1+AK2</i></b>                      | <b>0.7242</b>  | <b>0.0179</b>    |
| <i>(AKs+AK-HSDHs)/AK-HSDHs</i>         | <i>AK1+AK3</i>                             | -0.0715        | 0.8443           |
| <b><i>(AKs+AK-HSDHs)/AK-HSDHs</i></b>  | <b><i>AK2</i></b>                          | <b>0.7459</b>  | <b>0.0132</b>    |
| <b><i>(AKs+AK-HSDHs)/AK-HSDHs</i></b>  | <b><i>AK2+AK3</i></b>                      | <b>0.7548</b>  | <b>0.0116</b>    |

|                           |                                |                |               |
|---------------------------|--------------------------------|----------------|---------------|
| (AKs+AK-HSDHs)/AK-HSDHs   | AK3                            | 0.1720         | 0.6347        |
| (AKs+AK-HSDHs)/AK-HSDHs   | AK-HSDH1                       | <b>-0.8182</b> | <b>0.0038</b> |
| (AKs+AK-HSDHs)/AK-HSDHs   | AK-HSDH2                       | <b>-0.5349</b> | <b>0.1111</b> |
| (AKs+AK-HSDHs)/AK-HSDHs   | AK-HSDHs                       | <b>-0.8097</b> | <b>0.0045</b> |
| (AKs+AK-HSDHs)/AK-HSDHs   | AK-HSDHs+CGS1                  | <b>-0.6860</b> | <b>0.0285</b> |
| (AKs+AK-HSDHs)/AK-HSDHs   | AK-HSDHs+TS1                   | <b>-0.5580</b> | <b>0.0937</b> |
| (AKs+AK-HSDHs)/AK-HSDHs   | AK-HSDHs+TS1+TD1               | <b>-0.5412</b> | <b>0.1062</b> |
| (AKs+AK-HSDHs)/AK-HSDHs   | AK-HSDHs+TS1+THAs              | <b>-0.5455</b> | <b>0.1029</b> |
| (AKs+AK-HSDHs)/AK-HSDHs   | AKs                            | <b>0.7432</b>  | <b>0.0138</b> |
| (AKs+AK-HSDHs)/AK-HSDHs   | AKs+AK-HSDHs                   | <b>0.5584</b>  | <b>0.0934</b> |
| (AKs+AK-HSDHs)/AK-HSDHs   | AKs+AK-HSDHs+CGS1              | <b>0.4326</b>  | <b>0.2118</b> |
| (AKs+AK-HSDHs)/AK-HSDHs   | AKs+AK-HSDHs+DHDPSs            | <b>0.5420</b>  | <b>0.1055</b> |
| (AKs+AK-HSDHs)/AK-HSDHs   | AKs+AK-HSDHs+TS1               | 0.2621         | 0.4645        |
| (AKs+AK-HSDHs)/AK-HSDHs   | AKs+AK-HSDHs+TS1+TD1           | 0.2391         | 0.5058        |
| (AKs+AK-HSDHs)/AK-HSDHs   | AKs+AK-HSDHs+TS1+THAs          | 0.2690         | 0.4524        |
| (AKs+AK-HSDHs)/AK-HSDHs   | AKs+DHDPSs                     | <b>0.7283</b>  | <b>0.0169</b> |
| (AKs+AK-HSDHs)/AK-HSDHs   | BCAT1                          | -0.0689        | 0.8501        |
| (AKs+AK-HSDHs)/AK-HSDHs   | Biosynthetic genes analyzed    | 0.1569         | 0.6651        |
| (AKs+AK-HSDHs)/AK-HSDHs   | Catabolic genes analyzed       | <b>-0.7172</b> | <b>0.0196</b> |
| (AKs+AK-HSDHs)/AK-HSDHs   | CGS1                           | <b>-0.4155</b> | <b>0.2324</b> |
| (AKs+AK-HSDHs)/AK-HSDHs   | DHDPS1                         | 0.1196         | 0.7420        |
| (AKs+AK-HSDHs)/AK-HSDHs   | DHDPS2                         | <b>-0.5194</b> | <b>0.1239</b> |
| (AKs+AK-HSDHs)/AK-HSDHs   | DHDPSs                         | -0.2850        | 0.4248        |
| (AKs+AK-HSDHs)/AK-HSDHs   | LKR-SDHI                       | <b>0.6965</b>  | <b>0.0252</b> |
| (AKs+AK-HSDHs)/AK-HSDHs   | SAMS1                          | -0.2118        | 0.5569        |
| (AKs+AK-HSDHs)/AK-HSDHs   | SAMS2                          | 0.0328         | 0.9283        |
| (AKs+AK-HSDHs)/AK-HSDHs   | SAMS3                          | <b>-0.7288</b> | <b>0.0168</b> |
| (AKs+AK-HSDHs)/AK-HSDHs   | SAMS4                          | <b>-0.6735</b> | <b>0.0328</b> |
| (AKs+AK-HSDHs)/AK-HSDHs   | SAMSs                          | <b>-0.7192</b> | <b>0.0191</b> |
| (AKs+AK-HSDHs)/AK-HSDHs   | TD1                            | -0.2550        | 0.4771        |
| (AKs+AK-HSDHs)/AK-HSDHs   | THA1                           | 0.3046         | 0.3921        |
| (AKs+AK-HSDHs)/AK-HSDHs   | THA2                           | <b>0.5020</b>  | <b>0.1393</b> |
| (AKs+AK-HSDHs)/AK-HSDHs   | THAs                           | <b>0.6049</b>  | <b>0.0639</b> |
| (AKs+AK-HSDHs)/AK-HSDHs   | THAs+TD1                       | -0.1394        | 0.7010        |
| (AKs+AK-HSDHs)/AK-HSDHs   | TS1                            | -0.3727        | 0.2888        |
| (AKs+AK-HSDHs+CGS1)/SAMSs | (AKs+AK-HSDHs)/AK-HSDHs        | <b>0.8844</b>  | <b>0.0007</b> |
| (AKs+AK-HSDHs+CGS1)/SAMSs | (AKs+AK-HSDHs+DHDPSs)/LKR-SDHI | 0.0547         | 0.8807        |
| (AKs+AK-HSDHs+CGS1)/SAMSs | (AKs+DHDPSs)/LKR-SDHI          | 0.2754         | 0.4412        |
| (AKs+AK-HSDHs+CGS1)/SAMSs | AK1                            | -0.2562        | 0.4749        |
| (AKs+AK-HSDHs+CGS1)/SAMSs | AK1+AK2                        | <b>0.8698</b>  | <b>0.0011</b> |
| (AKs+AK-HSDHs+CGS1)/SAMSs | AK1+AK3                        | -0.1106        | 0.7611        |
| (AKs+AK-HSDHs+CGS1)/SAMSs | AK2                            | <b>0.8915</b>  | <b>0.0005</b> |
| (AKs+AK-HSDHs+CGS1)/SAMSs | AK2+AK3                        | <b>0.8937</b>  | <b>0.0005</b> |
| (AKs+AK-HSDHs+CGS1)/SAMSs | AK3                            | 0.1523         | 0.6745        |
| (AKs+AK-HSDHs+CGS1)/SAMSs | AK-HSDH1                       | <b>-0.6160</b> | <b>0.0579</b> |
| (AKs+AK-HSDHs+CGS1)/SAMSs | AK-HSDH2                       | -0.3318        | 0.3490        |
| (AKs+AK-HSDHs+CGS1)/SAMSs | AK-HSDHs                       | <b>-0.5621</b> | <b>0.0908</b> |
| (AKs+AK-HSDHs+CGS1)/SAMSs | AK-HSDHs+CGS1                  | <b>-0.4656</b> | <b>0.1750</b> |
| (AKs+AK-HSDHs+CGS1)/SAMSs | AK-HSDHs+TS1                   | -0.3279        | 0.3550        |
| (AKs+AK-HSDHs+CGS1)/SAMSs | AK-HSDHs+TS1+TD1               | -0.3282        | 0.3546        |
| (AKs+AK-HSDHs+CGS1)/SAMSs | AK-HSDHs+TS1+THAs              | -0.3160        | 0.3738        |
| (AKs+AK-HSDHs+CGS1)/SAMSs | AKs                            | <b>0.8824</b>  | <b>0.0007</b> |
| (AKs+AK-HSDHs+CGS1)/SAMSs | AKs/AK-HSDHs                   | <b>0.8844</b>  | <b>0.0007</b> |
| (AKs+AK-HSDHs+CGS1)/SAMSs | AKs+AK-HSDHs                   | <b>0.7677</b>  | <b>0.0095</b> |
| (AKs+AK-HSDHs+CGS1)/SAMSs | AKs+AK-HSDHs+CGS1              | <b>0.6652</b>  | <b>0.0358</b> |
| (AKs+AK-HSDHs+CGS1)/SAMSs | AKs+AK-HSDHs+DHDPSs            | <b>0.7525</b>  | <b>0.0120</b> |
| (AKs+AK-HSDHs+CGS1)/SAMSs | AKs+AK-HSDHs+TS1               | <b>0.5175</b>  | <b>0.1255</b> |

|                                       |                                    |                |               |
|---------------------------------------|------------------------------------|----------------|---------------|
| <i>(AKs+AK-HSDHs+CGS1)/SAMSs</i>      | <i>AKs+AK-HSDHs+TS1+TD1</i>        | <b>0.4865</b>  | <b>0.1539</b> |
| <i>(AKs+AK-HSDHs+CGS1)/SAMSs</i>      | <i>AKs+AK-HSDHs+TS1+THAs</i>       | <b>0.5224</b>  | <b>0.1214</b> |
| <i>(AKs+AK-HSDHs+CGS1)/SAMSs</i>      | <i>AKs+DHDPSs</i>                  | <b>0.8702</b>  | <b>0.0011</b> |
| <i>(AKs+AK-HSDHs+CGS1)/SAMSs</i>      | <i>BCAT1</i>                       | -0.0251        | 0.9450        |
| <i>(AKs+AK-HSDHs+CGS1)/SAMSs</i>      | <b>Biosynthetic genes analyzed</b> | <b>0.4155</b>  | <b>0.2324</b> |
| <i>(AKs+AK-HSDHs+CGS1)/SAMSs</i>      | <b>Catabolic genes analyzed</b>    | <b>-0.6893</b> | <b>0.0275</b> |
| <i>(AKs+AK-HSDHs+CGS1)/SAMSs</i>      | <i>CGS1</i>                        | -0.2656        | 0.4583        |
| <i>(AKs+AK-HSDHs+CGS1)/SAMSs</i>      | <i>DHDPS1</i>                      | 0.0923         | 0.7998        |
| <i>(AKs+AK-HSDHs+CGS1)/SAMSs</i>      | <i>DHDPS2</i>                      | -0.3925        | 0.2619        |
| <i>(AKs+AK-HSDHs+CGS1)/SAMSs</i>      | <i>DHDPSs</i>                      | -0.2219        | 0.5377        |
| <i>(AKs+AK-HSDHs+CGS1)/SAMSs</i>      | <i>DHDPSs/LKR-SDHI</i>             | <b>-0.6210</b> | <b>0.0553</b> |
| <i>(AKs+AK-HSDHs+CGS1)/SAMSs</i>      | <i>LKR-SDHI</i>                    | <b>0.5663</b>  | <b>0.0879</b> |
| <i>(AKs+AK-HSDHs+CGS1)/SAMSs</i>      | <i>SAMS1</i>                       | -0.3578        | 0.3100        |
| <i>(AKs+AK-HSDHs+CGS1)/SAMSs</i>      | <i>SAMS2</i>                       | 0.0119         | 0.9740        |
| <i>(AKs+AK-HSDHs+CGS1)/SAMSs</i>      | <i>SAMS3</i>                       | <b>-0.6341</b> | <b>0.0490</b> |
| <i>(AKs+AK-HSDHs+CGS1)/SAMSs</i>      | <i>SAMS4</i>                       | <b>-0.6120</b> | <b>0.0600</b> |
| <i>(AKs+AK-HSDHs+CGS1)/SAMSs</i>      | <i>SAMSs</i>                       | <b>-0.6913</b> | <b>0.0268</b> |
| <i>(AKs+AK-HSDHs+CGS1)/SAMSs</i>      | <i>TD1</i>                         | -0.2588        | 0.4703        |
| <i>(AKs+AK-HSDHs+CGS1)/SAMSs</i>      | <i>THA1</i>                        | 0.3062         | 0.3896        |
| <i>(AKs+AK-HSDHs+CGS1)/SAMSs</i>      | <i>THA2</i>                        | <b>0.5149</b>  | <b>0.1277</b> |
| <i>(AKs+AK-HSDHs+CGS1)/SAMSs</i>      | <i>THAs</i>                        | <b>0.6048</b>  | <b>0.0640</b> |
| <i>(AKs+AK-HSDHs+CGS1)/SAMSs</i>      | <i>THAs+TD1</i>                    | -0.1413        | 0.6971        |
| <i>(AKs+AK-HSDHs+CGS1)/SAMSs</i>      | <i>TS1</i>                         | -0.1793        | 0.6201        |
| <i>(AKs+AK-HSDHs+DHDPSs)/LKR-SDHI</i> | <i>(AKs+AK-HSDHs)/AK-HSDHs</i>     | -0.2622        | 0.4643        |
| <i>(AKs+AK-HSDHs+DHDPSs)/LKR-SDHI</i> | <i>AK1</i>                         | 0.0456         | 0.9004        |
| <i>(AKs+AK-HSDHs+DHDPSs)/LKR-SDHI</i> | <i>AK1+AK2</i>                     | 0.3394         | 0.3374        |
| <i>(AKs+AK-HSDHs+DHDPSs)/LKR-SDHI</i> | <i>AK1+AK3</i>                     | 0.1188         | 0.7437        |
| <i>(AKs+AK-HSDHs+DHDPSs)/LKR-SDHI</i> | <i>AK2</i>                         | 0.3184         | 0.3699        |
| <i>(AKs+AK-HSDHs+DHDPSs)/LKR-SDHI</i> | <i>AK2+AK3</i>                     | 0.3271         | 0.3562        |
| <i>(AKs+AK-HSDHs+DHDPSs)/LKR-SDHI</i> | <i>AK3</i>                         | 0.0925         | 0.7995        |
| <i>(AKs+AK-HSDHs+DHDPSs)/LKR-SDHI</i> | <i>AK-HSDHI</i>                    | <b>0.4162</b>  | <b>0.2316</b> |
| <i>(AKs+AK-HSDHs+DHDPSs)/LKR-SDHI</i> | <i>AK-HSDH2</i>                    | <b>0.6731</b>  | <b>0.0329</b> |
| <i>(AKs+AK-HSDHs+DHDPSs)/LKR-SDHI</i> | <i>AK-HSDHs</i>                    | <b>0.6729</b>  | <b>0.0330</b> |
| <i>(AKs+AK-HSDHs+DHDPSs)/LKR-SDHI</i> | <i>AK-HSDHs+CGS1</i>               | <b>0.6737</b>  | <b>0.0327</b> |
| <i>(AKs+AK-HSDHs+DHDPSs)/LKR-SDHI</i> | <i>AK-HSDHs+TS1</i>                | <b>0.4552</b>  | <b>0.1862</b> |
| <i>(AKs+AK-HSDHs+DHDPSs)/LKR-SDHI</i> | <i>AK-HSDHs+TS1+TD1</i>            | <b>0.4263</b>  | <b>0.2193</b> |
| <i>(AKs+AK-HSDHs+DHDPSs)/LKR-SDHI</i> | <i>AK-HSDHs+TS1+THAs</i>           | <b>0.4509</b>  | <b>0.1910</b> |
| <i>(AKs+AK-HSDHs+DHDPSs)/LKR-SDHI</i> | <i>AKs</i>                         | 0.3504         | 0.3209        |
| <i>(AKs+AK-HSDHs+DHDPSs)/LKR-SDHI</i> | <i>AKs/AK-HSDHs</i>                | -0.2622        | 0.4643        |
| <i>(AKs+AK-HSDHs+DHDPSs)/LKR-SDHI</i> | <i>AKs+AK-HSDHs</i>                | <b>0.5409</b>  | <b>0.1064</b> |
| <i>(AKs+AK-HSDHs+DHDPSs)/LKR-SDHI</i> | <i>AKs+AK-HSDHs+CGS1</i>           | <b>0.6356</b>  | <b>0.0483</b> |
| <i>(AKs+AK-HSDHs+DHDPSs)/LKR-SDHI</i> | <i>AKs+AK-HSDHs+DHDPSs</i>         | <b>0.5390</b>  | <b>0.1079</b> |
| <i>(AKs+AK-HSDHs+DHDPSs)/LKR-SDHI</i> | <i>AKs+AK-HSDHs+TS1</i>            | <b>0.5648</b>  | <b>0.0889</b> |
| <i>(AKs+AK-HSDHs+DHDPSs)/LKR-SDHI</i> | <i>AKs+AK-HSDHs+TS1+TD1</i>        | <b>0.5515</b>  | <b>0.0984</b> |
| <i>(AKs+AK-HSDHs+DHDPSs)/LKR-SDHI</i> | <i>AKs+AK-HSDHs+TS1+THAs</i>       | <b>0.5611</b>  | <b>0.0915</b> |
| <i>(AKs+AK-HSDHs+DHDPSs)/LKR-SDHI</i> | <i>AKs+DHDPSs</i>                  | 0.3527         | 0.3176        |
| <i>(AKs+AK-HSDHs+DHDPSs)/LKR-SDHI</i> | <i>BCAT1</i>                       | 0.2038         | 0.5722        |
| <i>(AKs+AK-HSDHs+DHDPSs)/LKR-SDHI</i> | <b>Biosynthetic genes analyzed</b> | <b>0.6058</b>  | <b>0.0634</b> |
| <i>(AKs+AK-HSDHs+DHDPSs)/LKR-SDHI</i> | <b>Catabolic genes analyzed</b>    | <b>0.4432</b>  | <b>0.1995</b> |
| <i>(AKs+AK-HSDHs+DHDPSs)/LKR-SDHI</i> | <i>CGS1</i>                        | <b>0.5467</b>  | <b>0.1020</b> |
| <i>(AKs+AK-HSDHs+DHDPSs)/LKR-SDHI</i> | <i>DHDPS1</i>                      | <b>-0.4674</b> | <b>0.1732</b> |
| <i>(AKs+AK-HSDHs+DHDPSs)/LKR-SDHI</i> | <i>DHDPS2</i>                      | <b>0.4839</b>  | <b>0.1565</b> |
| <i>(AKs+AK-HSDHs+DHDPSs)/LKR-SDHI</i> | <i>DHDPSs</i>                      | 0.0547         | 0.8806        |
| <i>(AKs+AK-HSDHs+DHDPSs)/LKR-SDHI</i> | <i>LKR-SDHI</i>                    | <b>-0.7226</b> | <b>0.0182</b> |
| <i>(AKs+AK-HSDHs+DHDPSs)/LKR-SDHI</i> | <i>SAMS1</i>                       | -0.2454        | 0.4944        |
| <i>(AKs+AK-HSDHs+DHDPSs)/LKR-SDHI</i> | <i>SAMS2</i>                       | -0.2303        | 0.5221        |
| <i>(AKs+AK-HSDHs+DHDPSs)/LKR-SDHI</i> | <i>SAMS3</i>                       | <b>0.6303</b>  | <b>0.0508</b> |



|                                       |                                       |                |               |
|---------------------------------------|---------------------------------------|----------------|---------------|
| <i>(AKs+AK-HSDHs+DHDPSs)/LKR-SDHI</i> | <i>SAMS4</i>                          | <b>0.4518</b>  | <b>0.1899</b> |
| <i>(AKs+AK-HSDHs+DHDPSs)/LKR-SDHI</i> | <i>SAMSs</i>                          | <b>0.4440</b>  | <b>0.1986</b> |
| <i>(AKs+AK-HSDHs+DHDPSs)/LKR-SDHI</i> | <i>TD1</i>                            | 0.0553         | 0.8794        |
| <i>(AKs+AK-HSDHs+DHDPSs)/LKR-SDHI</i> | <i>THA1</i>                           | <b>-0.6373</b> | <b>0.0475</b> |
| <i>(AKs+AK-HSDHs+DHDPSs)/LKR-SDHI</i> | <i>THA2</i>                           | -0.0002        | 0.9995        |
| <i>(AKs+AK-HSDHs+DHDPSs)/LKR-SDHI</i> | <i>THAs</i>                           | -0.0633        | 0.8620        |
| <i>(AKs+AK-HSDHs+DHDPSs)/LKR-SDHI</i> | <i>THAs+TD1</i>                       | 0.0356         | 0.9223        |
| <i>(AKs+AK-HSDHs+DHDPSs)/LKR-SDHI</i> | <i>TS1</i>                            | 0.2984         | 0.4024        |
| <i>(AKs+AK-HSDHs+TS1)/(THAs+TD1)</i>  | <i>(AK-HSDHs+CGS1)/SAMSs</i>          | <b>0.4218</b>  | <b>0.2247</b> |
| <i>(AKs+AK-HSDHs+TS1)/(THAs+TD1)</i>  | <i>(AKs+AK-HSDHs)/AK-HSDHs</i>        | 0.1077         | 0.7670        |
| <i>(AKs+AK-HSDHs+TS1)/(THAs+TD1)</i>  | <i>(AKs+AK-HSDHs+CGS1)/SAMSs</i>      | 0.3886         | 0.2672        |
| <i>(AKs+AK-HSDHs+TS1)/(THAs+TD1)</i>  | <i>(AKs+AK-HSDHs+DHDPSs)/LKR-SDHI</i> | <b>0.6165</b>  | <b>0.0577</b> |
| <i>(AKs+AK-HSDHs+TS1)/(THAs+TD1)</i>  | <i>(AKs+DHDPSs)/LKR-SDHI</i>          | <b>0.6688</b>  | <b>0.0345</b> |
| <i>(AKs+AK-HSDHs+TS1)/(THAs+TD1)</i>  | <i>AK1</i>                            | 0.2098         | 0.5608        |
| <i>(AKs+AK-HSDHs+TS1)/(THAs+TD1)</i>  | <i>AK1+AK2</i>                        | <b>0.4002</b>  | <b>0.2518</b> |
| <i>(AKs+AK-HSDHs+TS1)/(THAs+TD1)</i>  | <i>AK1+AK3</i>                        | 0.1567         | 0.6654        |
| <i>(AKs+AK-HSDHs+TS1)/(THAs+TD1)</i>  | <i>AK2</i>                            | 0.3418         | 0.3337        |
| <i>(AKs+AK-HSDHs+TS1)/(THAs+TD1)</i>  | <i>AK2+AK3</i>                        | 0.3262         | 0.3577        |
| <i>(AKs+AK-HSDHs+TS1)/(THAs+TD1)</i>  | <i>AK3</i>                            | -0.0492        | 0.8925        |
| <i>(AKs+AK-HSDHs+TS1)/(THAs+TD1)</i>  | <i>AK-HSDH1</i>                       | 0.1944         | 0.5905        |
| <i>(AKs+AK-HSDHs+TS1)/(THAs+TD1)</i>  | <i>AK-HSDH2</i>                       | -0.0449        | 0.9020        |
| <i>(AKs+AK-HSDHs+TS1)/(THAs+TD1)</i>  | <i>AK-HSDHs</i>                       | 0.0797         | 0.8268        |
| <i>(AKs+AK-HSDHs+TS1)/(THAs+TD1)</i>  | <i>AK-HSDHs+CGS1</i>                  | -0.0530        | 0.8843        |
| <i>(AKs+AK-HSDHs+TS1)/(THAs+TD1)</i>  | <i>AK-HSDHs+TS1</i>                   | -0.1245        | 0.7319        |
| <i>(AKs+AK-HSDHs+TS1)/(THAs+TD1)</i>  | <i>AK-HSDHs+TS1+TD1</i>               | -0.1803        | 0.6181        |
| <i>(AKs+AK-HSDHs+TS1)/(THAs+TD1)</i>  | <i>AK-HSDHs+TS1+THAs</i>              | -0.1259        | 0.7288        |
| <i>(AKs+AK-HSDHs+TS1)/(THAs+TD1)</i>  | <i>AKs</i>                            | 0.3848         | 0.2722        |
| <i>(AKs+AK-HSDHs+TS1)/(THAs+TD1)</i>  | <i>AKs/AK-HSDHs</i>                   | 0.1077         | 0.7670        |
| <i>(AKs+AK-HSDHs+TS1)/(THAs+TD1)</i>  | <i>AKs+AK-HSDHs</i>                   | <b>0.4195</b>  | <b>0.2275</b> |
| <i>(AKs+AK-HSDHs+TS1)/(THAs+TD1)</i>  | <i>AKs+AK-HSDHs+CGS1</i>              | 0.3552         | 0.3138        |
| <i>(AKs+AK-HSDHs+TS1)/(THAs+TD1)</i>  | <i>AKs+AK-HSDHs+DHDPSs</i>            | 0.3956         | 0.2578        |
| <i>(AKs+AK-HSDHs+TS1)/(THAs+TD1)</i>  | <i>AKs+AK-HSDHs+TS1</i>               | 0.2365         | 0.5107        |
| <i>(AKs+AK-HSDHs+TS1)/(THAs+TD1)</i>  | <i>AKs+AK-HSDHs+TS1+TD1</i>           | 0.1881         | 0.6029        |
| <i>(AKs+AK-HSDHs+TS1)/(THAs+TD1)</i>  | <i>AKs+AK-HSDHs+TS1+THAs</i>          | 0.2353         | 0.5128        |
| <i>(AKs+AK-HSDHs+TS1)/(THAs+TD1)</i>  | <i>AKs+DHDPSs</i>                     | 0.3624         | 0.3034        |
| <i>(AKs+AK-HSDHs+TS1)/(THAs+TD1)</i>  | <i>BCAT1</i>                          | <b>0.7035</b>  | <b>0.0232</b> |
| <i>(AKs+AK-HSDHs+TS1)/(THAs+TD1)</i>  | Biosynthetic genes analyzed           | 0.1675         | 0.6437        |
| <i>(AKs+AK-HSDHs+TS1)/(THAs+TD1)</i>  | Catabolic genes analyzed              | -0.3066        | 0.3890        |
| <i>(AKs+AK-HSDHs+TS1)/(THAs+TD1)</i>  | <i>CGS1</i>                           | -0.1839        | 0.6110        |
| <i>(AKs+AK-HSDHs+TS1)/(THAs+TD1)</i>  | <i>CGS1/SAMSs</i>                     | 0.1389         | 0.7020        |
| <i>(AKs+AK-HSDHs+TS1)/(THAs+TD1)</i>  | <i>DHDPS1</i>                         | <b>-0.5429</b> | <b>0.1049</b> |
| <i>(AKs+AK-HSDHs+TS1)/(THAs+TD1)</i>  | <i>DHDPS2</i>                         | -0.3105        | 0.3825        |
| <i>(AKs+AK-HSDHs+TS1)/(THAs+TD1)</i>  | <i>DHDPSs</i>                         | <b>-0.5410</b> | <b>0.1063</b> |
| <i>(AKs+AK-HSDHs+TS1)/(THAs+TD1)</i>  | <i>DHDPSs/LKR-SDHI</i>                | -0.0486        | 0.8940        |
| <i>(AKs+AK-HSDHs+TS1)/(THAs+TD1)</i>  | <i>LKR-SDHI</i>                       | -0.1899        | 0.5993        |
| <i>(AKs+AK-HSDHs+TS1)/(THAs+TD1)</i>  | <i>SAMS1</i>                          | <b>-0.8627</b> | <b>0.0013</b> |
| <i>(AKs+AK-HSDHs+TS1)/(THAs+TD1)</i>  | <i>SAMS2</i>                          | <b>-0.6437</b> | <b>0.0446</b> |
| <i>(AKs+AK-HSDHs+TS1)/(THAs+TD1)</i>  | <i>SAMS3</i>                          | 0.0980         | 0.7876        |
| <i>(AKs+AK-HSDHs+TS1)/(THAs+TD1)</i>  | <i>SAMS4</i>                          | -0.3245        | 0.3603        |
| <i>(AKs+AK-HSDHs+TS1)/(THAs+TD1)</i>  | <i>SAMSs</i>                          | -0.3053        | 0.3910        |
| <i>(AKs+AK-HSDHs+TS1)/(THAs+TD1)</i>  | <i>TD1</i>                            | <b>-0.6630</b> | <b>0.0366</b> |
| <i>(AKs+AK-HSDHs+TS1)/(THAs+TD1)</i>  | <i>THA1</i>                           | -0.0021        | 0.9954        |
| <i>(AKs+AK-HSDHs+TS1)/(THAs+TD1)</i>  | <i>THA2</i>                           | -0.0631        | 0.8625        |
| <i>(AKs+AK-HSDHs+TS1)/(THAs+TD1)</i>  | <i>THAs</i>                           | -0.0568        | 0.8761        |
| <i>(AKs+AK-HSDHs+TS1)/(THAs+TD1)</i>  | <i>THAs+TD1</i>                       | <b>-0.6545</b> | <b>0.0400</b> |
| <i>(AKs+AK-HSDHs+TS1)/(THAs+TD1)</i>  | <i>TS1</i>                            | -0.1964        | 0.5866        |
| <i>(AKs+AK-HSDHs+TS1)/(THAs+TD1)</i>  | <i>TS1/(THAs+TD1)</i>                 | <b>0.7899</b>  | <b>0.0066</b> |

|                                                    |                                     |                |                  |
|----------------------------------------------------|-------------------------------------|----------------|------------------|
| $(AK_s+AK-HSDH_s+TSI)/(THA_s+TDI)$                 | <b>TSI/TDI</b>                      | <b>0.8817</b>  | <b>0.0007</b>    |
| $(AK_s+AK-HSDH_s+TSI)/(THA_s+TDI)$                 | <i>TSI/THA_s</i>                    | -0.3543        | 0.3152           |
| $(AK_s+AK-HSDH_s+TSI+TDI)/BCAT1$                   | $(AK-HSDH_s+CGS1)/SAMS_s$           | 0.2775         | 0.4376           |
| $(AK_s+AK-HSDH_s+TSI+TDI)/BCAT1$                   | $(AK-HSDH_s+TSI)/(THA_s+TDI)$       | -0.1337        | 0.7127           |
| $(AK_s+AK-HSDH_s+TSI+TDI)/BCAT1$                   | $(AK_s+AK-HSDH_s)/AK-HSDH_s$        | -0.1789        | 0.6209           |
| $(AK_s+AK-HSDH_s+TSI+TDI)/BCAT1$                   | $(AK_s+AK-HSDH_s+CGS1)/SAMS_s$      | 0.0433         | 0.9055           |
| $(AK_s+AK-HSDH_s+TSI+TDI)/BCAT1$                   | $(AK_s+AK-HSDH_s+DHDPS_s)/LKR-SDHI$ | 0.2117         | 0.5570           |
| $(AK_s+AK-HSDH_s+TSI+TDI)/BCAT1$                   | $(AK_s+AK-HSDH_s+TSI)/(THA_s+TDI)$  | -0.1564        | 0.6661           |
| $(AK_s+AK-HSDH_s+TSI+TDI)/BCAT1$                   | $(AK_s+DHDPS_s)/LKR-SDHI$           | 0.2151         | 0.5507           |
| $(AK_s+AK-HSDH_s+TSI+TDI)/BCAT1$                   | <i>AK1</i>                          | 0.0823         | 0.8213           |
| $(AK_s+AK-HSDH_s+TSI+TDI)/BCAT1$                   | <i>AK1+AK2</i>                      | 0.2364         | 0.5108           |
| $(AK_s+AK-HSDH_s+TSI+TDI)/BCAT1$                   | <i>AK1+AK3</i>                      | -0.3446        | 0.3295           |
| $(AK_s+AK-HSDH_s+TSI+TDI)/BCAT1$                   | <i>AK2</i>                          | 0.2113         | 0.5579           |
| $(AK_s+AK-HSDH_s+TSI+TDI)/BCAT1$                   | <i>AK2+AK3</i>                      | 0.1133         | 0.7552           |
| <b><math>(AK_s+AK-HSDH_s+TSI+TDI)/BCAT1</math></b> | <b>AK3</b>                          | <b>-0.5276</b> | <b>0.1171</b>    |
| $(AK_s+AK-HSDH_s+TSI+TDI)/BCAT1$                   | <i>AK-HSDH1</i>                     | -0.0052        | 0.9887           |
| $(AK_s+AK-HSDH_s+TSI+TDI)/BCAT1$                   | <i>AK-HSDH2</i>                     | 0.3782         | 0.2812           |
| $(AK_s+AK-HSDH_s+TSI+TDI)/BCAT1$                   | <i>AK-HSDH_s</i>                    | 0.2501         | 0.4858           |
| <b><math>(AK_s+AK-HSDH_s+TSI+TDI)/BCAT1</math></b> | <b>AK-HSDH_s+CGS1</b>               | <b>0.4193</b>  | <b>0.2277</b>    |
| $(AK_s+AK-HSDH_s+TSI+TDI)/BCAT1$                   | <i>AK-HSDH_s+TSI</i>                | 0.3639         | 0.3013           |
| $(AK_s+AK-HSDH_s+TSI+TDI)/BCAT1$                   | <i>AK-HSDH_s+TSI+TDI</i>            | 0.3684         | 0.2948           |
| $(AK_s+AK-HSDH_s+TSI+TDI)/BCAT1$                   | <i>AK-HSDH_s+TSI+THA_s</i>          | 0.3676         | 0.2960           |
| $(AK_s+AK-HSDH_s+TSI+TDI)/BCAT1$                   | <i>AK_s</i>                         | 0.1362         | 0.7075           |
| $(AK_s+AK-HSDH_s+TSI+TDI)/BCAT1$                   | <i>AK_s/AK-HSDH_s</i>               | -0.1789        | 0.6209           |
| $(AK_s+AK-HSDH_s+TSI+TDI)/BCAT1$                   | <i>AK_s+AK-HSDH_s</i>               | 0.2072         | 0.5658           |
| $(AK_s+AK-HSDH_s+TSI+TDI)/BCAT1$                   | <i>AK_s+AK-HSDH_s+CGS1</i>          | 0.3153         | 0.3749           |
| $(AK_s+AK-HSDH_s+TSI+TDI)/BCAT1$                   | <i>AK_s+AK-HSDH_s+DHDPS_s</i>       | 0.2239         | 0.5340           |
| $(AK_s+AK-HSDH_s+TSI+TDI)/BCAT1$                   | <i>AK_s+AK-HSDH_s+TSI</i>           | 0.3357         | 0.3429           |
| $(AK_s+AK-HSDH_s+TSI+TDI)/BCAT1$                   | <i>AK_s+AK-HSDH_s+TSI+TDI</i>       | 0.3448         | 0.3293           |
| $(AK_s+AK-HSDH_s+TSI+TDI)/BCAT1$                   | <i>AK_s+AK-HSDH_s+TSI+THA_s</i>     | 0.3355         | 0.3433           |
| $(AK_s+AK-HSDH_s+TSI+TDI)/BCAT1$                   | <i>AK_s+DHDPS_s</i>                 | 0.1555         | 0.6679           |
| <b><math>(AK_s+AK-HSDH_s+TSI+TDI)/BCAT1</math></b> | <b>BCAT1</b>                        | <b>-0.4875</b> | <b>0.1529</b>    |
| <b><math>(AK_s+AK-HSDH_s+TSI+TDI)/BCAT1</math></b> | <b>Biosynthetic genes analyzed</b>  | <b>0.4062</b>  | <b>0.2441</b>    |
| $(AK_s+AK-HSDH_s+TSI+TDI)/BCAT1$                   | Catabolic genes analyzed            | 0.1906         | 0.5978           |
| <b><math>(AK_s+AK-HSDH_s+TSI+TDI)/BCAT1</math></b> | <b>CGS1</b>                         | <b>0.5214</b>  | <b>0.1222</b>    |
| $(AK_s+AK-HSDH_s+TSI+TDI)/BCAT1$                   | <i>CGS1/SAMS_s</i>                  | 0.1000         | 0.7835           |
| $(AK_s+AK-HSDH_s+TSI+TDI)/BCAT1$                   | <i>DHDPS1</i>                       | 0.2942         | 0.4093           |
| <b><math>(AK_s+AK-HSDH_s+TSI+TDI)/BCAT1</math></b> | <b>DHDPS2</b>                       | <b>0.4615</b>  | <b>0.1794</b>    |
| <b><math>(AK_s+AK-HSDH_s+TSI+TDI)/BCAT1</math></b> | <b>DHDPS_s</b>                      | <b>0.4759</b>  | <b>0.1644</b>    |
| $(AK_s+AK-HSDH_s+TSI+TDI)/BCAT1$                   | <i>DHDPS_s/LKR-SDHI</i>             | 0.3387         | 0.3384           |
| $(AK_s+AK-HSDH_s+TSI+TDI)/BCAT1$                   | <i>LKR-SDHI</i>                     | -0.2334        | 0.5163           |
| $(AK_s+AK-HSDH_s+TSI+TDI)/BCAT1$                   | <i>SAMS1</i>                        | 0.1710         | 0.6368           |
| $(AK_s+AK-HSDH_s+TSI+TDI)/BCAT1$                   | <i>SAMS2</i>                        | 0.2434         | 0.4981           |
| $(AK_s+AK-HSDH_s+TSI+TDI)/BCAT1$                   | <i>SAMS3</i>                        | 0.1342         | 0.7118           |
| $(AK_s+AK-HSDH_s+TSI+TDI)/BCAT1$                   | <i>SAMS4</i>                        | 0.1658         | 0.6472           |
| $(AK_s+AK-HSDH_s+TSI+TDI)/BCAT1$                   | <i>SAMS_s</i>                       | 0.1918         | 0.5956           |
| $(AK_s+AK-HSDH_s+TSI+TDI)/BCAT1$                   | <i>TDI</i>                          | 0.3153         | 0.3749           |
| <b><math>(AK_s+AK-HSDH_s+TSI+TDI)/BCAT1</math></b> | <b>TDI/BCAT1</b>                    | <b>0.9951</b>  | <b>&lt;.0001</b> |
| $(AK_s+AK-HSDH_s+TSI+TDI)/BCAT1$                   | <i>THA1</i>                         | -0.2535        | 0.4797           |
| $(AK_s+AK-HSDH_s+TSI+TDI)/BCAT1$                   | <i>THA2</i>                         | 0.2447         | 0.4957           |
| $(AK_s+AK-HSDH_s+TSI+TDI)/BCAT1$                   | <i>THA_s</i>                        | 0.2192         | 0.5429           |
| $(AK_s+AK-HSDH_s+TSI+TDI)/BCAT1$                   | <i>THA_s+TDI</i>                    | 0.3490         | 0.3229           |
| $(AK_s+AK-HSDH_s+TSI+TDI)/BCAT1$                   | <i>TSI</i>                          | 0.3685         | 0.2947           |
| $(AK_s+AK-HSDH_s+TSI+TDI)/BCAT1$                   | <i>TSI/(THA_s+TDI)</i>              | -0.1695        | 0.6396           |
| $(AK_s+AK-HSDH_s+TSI+TDI)/BCAT1$                   | <i>TSI/TDI</i>                      | -0.2516        | 0.4832           |
| $(AK_s+AK-HSDH_s+TSI+TDI)/BCAT1$                   | <i>TSI/THA_s</i>                    | 0.1193         | 0.7427           |
| $(AK_s+DHDPS_s)/LKR-SDHI$                          | $(AK_s+AK-HSDH_s)/AK-HSDH_s$        | -0.0237        | 0.9482           |

|                                        |                                              |                |                  |
|----------------------------------------|----------------------------------------------|----------------|------------------|
| <i>(AKs+DHDPSs)/LKR-SDHI</i>           | <i>(AKs+AK-HSDHs+DHDPSs)/LKR-SDHI</i>        | <b>0.9668</b>  | <b>&lt;.0001</b> |
| <i>(AKs+DHDPSs)/LKR-SDHI</i>           | AK1                                          | 0.0010         | 0.9978           |
| <i>(AKs+DHDPSs)/LKR-SDHI</i>           | <b>AK1+AK2</b>                               | <b>0.5465</b>  | <b>0.1021</b>    |
| <i>(AKs+DHDPSs)/LKR-SDHI</i>           | AK1+AK3                                      | 0.0583         | 0.8730           |
| <i>(AKs+DHDPSs)/LKR-SDHI</i>           | <b>AK2</b>                                   | <b>0.5274</b>  | <b>0.1172</b>    |
| <i>(AKs+DHDPSs)/LKR-SDHI</i>           | <b>AK2+AK3</b>                               | <b>0.5257</b>  | <b>0.1186</b>    |
| <i>(AKs+DHDPSs)/LKR-SDHI</i>           | AK3                                          | 0.0667         | 0.8548           |
| <i>(AKs+DHDPSs)/LKR-SDHI</i>           | AK-HSDH1                                     | 0.2062         | 0.5677           |
| <i>(AKs+DHDPSs)/LKR-SDHI</i>           | <b>AK-HSDH2</b>                              | <b>0.5464</b>  | <b>0.1022</b>    |
| <i>(AKs+DHDPSs)/LKR-SDHI</i>           | <b>AK-HSDHs</b>                              | <b>0.4723</b>  | <b>0.1681</b>    |
| <i>(AKs+DHDPSs)/LKR-SDHI</i>           | <b>AK-HSDHs+CGS1</b>                         | <b>0.5137</b>  | <b>0.1288</b>    |
| <i>(AKs+DHDPSs)/LKR-SDHI</i>           | AK-HSDHs+TS1                                 | 0.3169         | 0.3724           |
| <i>(AKs+DHDPSs)/LKR-SDHI</i>           | AK-HSDHs+TS1+TD1                             | 0.2897         | 0.4168           |
| <i>(AKs+DHDPSs)/LKR-SDHI</i>           | AK-HSDHs+TS1+THAs                            | 0.3155         | 0.3745           |
| <i>(AKs+DHDPSs)/LKR-SDHI</i>           | <b>AKs</b>                                   | <b>0.5493</b>  | <b>0.1000</b>    |
| <i>(AKs+DHDPSs)/LKR-SDHI</i>           | AKs/AK-HSDHs                                 | -0.0237        | 0.9482           |
| <i>(AKs+DHDPSs)/LKR-SDHI</i>           | <b>AKs+AK-HSDHs</b>                          | <b>0.6945</b>  | <b>0.0258</b>    |
| <i>(AKs+DHDPSs)/LKR-SDHI</i>           | <b>AKs+AK-HSDHs+CGS1</b>                     | <b>0.7616</b>  | <b>0.0105</b>    |
| <i>(AKs+DHDPSs)/LKR-SDHI</i>           | <b>AKs+AK-HSDHs+DHDPSs</b>                   | <b>0.6882</b>  | <b>0.0278</b>    |
| <i>(AKs+DHDPSs)/LKR-SDHI</i>           | <b>AKs+AK-HSDHs+TS1</b>                      | <b>0.6417</b>  | <b>0.0455</b>    |
| <i>(AKs+DHDPSs)/LKR-SDHI</i>           | <b>AKs+AK-HSDHs+TS1+TD1</b>                  | <b>0.6208</b>  | <b>0.0555</b>    |
| <i>(AKs+DHDPSs)/LKR-SDHI</i>           | <b>AKs+AK-HSDHs+TS1+THAs</b>                 | <b>0.6396</b>  | <b>0.0464</b>    |
| <i>(AKs+DHDPSs)/LKR-SDHI</i>           | <b>AKs+DHDPSs</b>                            | <b>0.5476</b>  | <b>0.1013</b>    |
| <i>(AKs+DHDPSs)/LKR-SDHI</i>           | BCAT1                                        | 0.2136         | 0.5535           |
| <i>(AKs+DHDPSs)/LKR-SDHI</i>           | <b>Biosynthetic genes analyzed</b>           | <b>0.6586</b>  | <b>0.0384</b>    |
| <i>(AKs+DHDPSs)/LKR-SDHI</i>           | Catabolic genes analyzed                     | 0.2647         | 0.4598           |
| <i>(AKs+DHDPSs)/LKR-SDHI</i>           | <b>CGS1</b>                                  | <b>0.4630</b>  | <b>0.1778</b>    |
| <i>(AKs+DHDPSs)/LKR-SDHI</i>           | <b>DHDPS1</b>                                | <b>-0.4739</b> | <b>0.1664</b>    |
| <i>(AKs+DHDPSs)/LKR-SDHI</i>           | DHDPS2                                       | 0.3767         | 0.2833           |
| <i>(AKs+DHDPSs)/LKR-SDHI</i>           | DHDPSs                                       | -0.0237        | 0.9481           |
| <i>(AKs+DHDPSs)/LKR-SDHI</i>           | <b>LKR-SDHI</b>                              | <b>-0.5865</b> | <b>0.0747</b>    |
| <i>(AKs+DHDPSs)/LKR-SDHI</i>           | SAMS1                                        | -0.3309        | 0.3504           |
| <i>(AKs+DHDPSs)/LKR-SDHI</i>           | SAMS2                                        | -0.2638        | 0.4614           |
| <i>(AKs+DHDPSs)/LKR-SDHI</i>           | <b>SAMS3</b>                                 | <b>0.4676</b>  | <b>0.1729</b>    |
| <i>(AKs+DHDPSs)/LKR-SDHI</i>           | SAMS4                                        | 0.2798         | 0.4336           |
| <i>(AKs+DHDPSs)/LKR-SDHI</i>           | SAMSs                                        | 0.2652         | 0.4590           |
| <i>(AKs+DHDPSs)/LKR-SDHI</i>           | TD1                                          | -0.0311        | 0.9321           |
| <i>(AKs+DHDPSs)/LKR-SDHI</i>           | <b>THA1</b>                                  | <b>-0.5817</b> | <b>0.0778</b>    |
| <i>(AKs+DHDPSs)/LKR-SDHI</i>           | THA2                                         | 0.1196         | 0.7421           |
| <i>(AKs+DHDPSs)/LKR-SDHI</i>           | THAs                                         | 0.0833         | 0.8190           |
| <i>(AKs+DHDPSs)/LKR-SDHI</i>           | THAs+TD1                                     | -0.0227        | 0.9504           |
| <i>(AKs+DHDPSs)/LKR-SDHI</i>           | TS1                                          | 0.2062         | 0.5677           |
| AK activity with four effectors        | <i>(AK-HSDHs+CGS1)/SAMSs</i>                 | 0.2184         | 0.5445           |
| AK activity with four effectors        | <i>(AK-HSDHs+TS1)/(THAs+TD1)</i>             | 0.3801         | 0.2786           |
| AK activity with four effectors        | <i>(AK-HSDHs+TS1+TD1)/BCAT1</i>              | 0.1930         | 0.5933           |
| AK activity with four effectors        | <i>(AKs+AK-HSDHs)/AK-HSDHs</i>               | 0.0592         | 0.8710           |
| AK activity with four effectors        | <i>(AKs+AK-HSDHs+CGS1)/SAMSs</i>             | 0.2710         | 0.4489           |
| <b>AK activity with four effectors</b> | <b><i>(AKs+AK-HSDHs+DHDPSs)/LKR-SDHI</i></b> | <b>0.8230</b>  | <b>0.0034</b>    |
| <b>AK activity with four effectors</b> | <b><i>(AKs+AK-HSDHs+TS1)/(THAs+TD1)</i></b>  | <b>0.5645</b>  | <b>0.0891</b>    |
| AK activity with four effectors        | <i>(AKs+AK-HSDHs+TS1+TD1)/BCAT1</i>          | 0.2053         | 0.5693           |
| <b>AK activity with four effectors</b> | <b><i>(AKs+DHDPSs)/LKR-SDHI</i></b>          | <b>0.8734</b>  | <b>0.0010</b>    |
| <b>AK activity with four effectors</b> | <b>AK activity without effectors</b>         | <b>0.9147</b>  | <b>0.0002</b>    |
| AK activity with four effectors        | AK1                                          | -0.0408        | 0.9109           |
| <b>AK activity with four effectors</b> | <b>AK1+AK2</b>                               | <b>0.5726</b>  | <b>0.0836</b>    |
| AK activity with four effectors        | AK1+AK3                                      | -0.1069        | 0.7689           |
| <b>AK activity with four effectors</b> | <b>AK2</b>                                   | <b>0.5610</b>  | <b>0.0916</b>    |
| <b>AK activity with four effectors</b> | <b>AK2+AK3</b>                               | <b>0.5293</b>  | <b>0.1157</b>    |

|                                        |                                       |                |               |
|----------------------------------------|---------------------------------------|----------------|---------------|
| AK activity with four effectors        | AK3                                   | -0.0979        | 0.7880        |
| AK activity with four effectors        | AK-HSDH1                              | 0.2680         | 0.4541        |
| AK activity with four effectors        | AK-HSDH2                              | 0.2940         | 0.4097        |
| AK activity with four effectors        | AK-HSDHs                              | 0.3434         | 0.3313        |
| <b>AK activity with four effectors</b> | <b>AK-HSDHs+CGS1</b>                  | <b>0.4753</b>  | <b>0.1650</b> |
| AK activity with four effectors        | AK-HSDHs+TS1                          | 0.3789         | 0.2803        |
| AK activity with four effectors        | AK-HSDHs+TS1+TD1                      | 0.3494         | 0.3224        |
| AK activity with four effectors        | AK-HSDHs+TS1+THAs                     | 0.3846         | 0.2725        |
| <b>AK activity with four effectors</b> | <b>AKs</b>                            | <b>0.5451</b>  | <b>0.1032</b> |
| AK activity with four effectors        | AKs/AK-HSDHs                          | 0.0592         | 0.8710        |
| <b>AK activity with four effectors</b> | <b>AKs+AK-HSDHs</b>                   | <b>0.6565</b>  | <b>0.0392</b> |
| <b>AK activity with four effectors</b> | <b>AKs+AK-HSDHs+CGS1</b>              | <b>0.7406</b>  | <b>0.0143</b> |
| <b>AK activity with four effectors</b> | <b>AKs+AK-HSDHs+DHDPSs</b>            | <b>0.6504</b>  | <b>0.0417</b> |
| <b>AK activity with four effectors</b> | <b>AKs+AK-HSDHs+TS1</b>               | <b>0.6769</b>  | <b>0.0316</b> |
| <b>AK activity with four effectors</b> | <b>AKs+AK-HSDHs+TS1+TD1</b>           | <b>0.6552</b>  | <b>0.0398</b> |
| <b>AK activity with four effectors</b> | <b>AKs+AK-HSDHs+TS1+THAs</b>          | <b>0.6792</b>  | <b>0.0308</b> |
| <b>AK activity with four effectors</b> | <b>AKs+DHDPSs</b>                     | <b>0.5432</b>  | <b>0.1046</b> |
| AK activity with four effectors        | BCAT1                                 | 0.3062         | 0.3896        |
| <b>AK activity with four effectors</b> | <b>Biosynthetic genes analyzed</b>    | <b>0.7012</b>  | <b>0.0239</b> |
| AK activity with four effectors        | Catabolic genes analyzed              | 0.2487         | 0.4884        |
| <b>AK activity with four effectors</b> | <b>CGS1</b>                           | <b>0.5268</b>  | <b>0.1177</b> |
| AK activity with four effectors        | CGS1/SAMSs                            | -0.0376        | 0.9178        |
| AK activity with four effectors        | CGS1/TS1                              | 0.0627         | 0.8635        |
| AK activity with four effectors        | DHDPS1                                | -0.3357        | 0.3430        |
| AK activity with four effectors        | DHDPS2                                | 0.2791         | 0.4349        |
| AK activity with four effectors        | DHDPSs                                | -0.0113        | 0.9753        |
| AK activity with four effectors        | DHDPSs/AK-HSDHs                       | -0.3939        | 0.2600        |
| AK activity with four effectors        | DHDPSs/LKR-SDH1                       | 0.3633         | 0.3021        |
| AK activity with four effectors        | HSDH activity without effectors       | 0.2427         | 0.4992        |
| <b>AK activity with four effectors</b> | <b>LKR-SDH1</b>                       | <b>-0.4785</b> | <b>0.1618</b> |
| <b>AK activity with four effectors</b> | <b>SAMS1</b>                          | <b>-0.4099</b> | <b>0.2394</b> |
| AK activity with four effectors        | SAMS2                                 | -0.1467        | 0.6860        |
| <b>AK activity with four effectors</b> | <b>SAMS3</b>                          | <b>0.4809</b>  | <b>0.1594</b> |
| AK activity with four effectors        | SAMS4                                 | 0.2635         | 0.4620        |
| AK activity with four effectors        | SAMSs                                 | 0.2470         | 0.4915        |
| AK activity with four effectors        | TD1                                   | -0.0275        | 0.9398        |
| AK activity with four effectors        | TD1/BCAT1                             | 0.1707         | 0.6373        |
| <b>AK activity with four effectors</b> | <b>THA1</b>                           | <b>-0.6511</b> | <b>0.0414</b> |
| <b>AK activity with four effectors</b> | <b>THA2</b>                           | <b>0.4495</b>  | <b>0.1924</b> |
| <b>AK activity with four effectors</b> | <b>THAs</b>                           | <b>0.4019</b>  | <b>0.2496</b> |
| AK activity with four effectors        | THAs+TD1                              | 0.0485         | 0.8942        |
| AK activity with four effectors        | TS1                                   | 0.3439         | 0.3305        |
| AK activity with four effectors        | TS1/(THAs+TD1)                        | 0.2843         | 0.4259        |
| AK activity with four effectors        | TS1/TD1                               | 0.3314         | 0.3496        |
| AK activity with four effectors        | TS1/THAs                              | -0.1190        | 0.7433        |
| AK activity without effectors          | (AK-HSDHs+CGS1)/SAMSs                 | 0.3012         | 0.3977        |
| AK activity without effectors          | (AK-HSDHs+TS1)/(THAs+TD1)             | 0.3830         | 0.2746        |
| AK activity without effectors          | (AK-HSDHs+TS1+TD1)/BCAT1              | 0.0250         | 0.9454        |
| AK activity without effectors          | (AKs+AK-HSDHs)/AK-HSDHs               | 0.0992         | 0.7850        |
| AK activity without effectors          | (AKs+AK-HSDHs+CGS1)/SAMSs             | 0.2758         | 0.4406        |
| <b>AK activity without effectors</b>   | <b>(AKs+AK-HSDHs+DHDPSs)/LKR-SDH1</b> | <b>0.6270</b>  | <b>0.0523</b> |
| <b>AK activity without effectors</b>   | <b>(AKs+AK-HSDHs+TS1)/(THAs+TD1)</b>  | <b>0.5190</b>  | <b>0.1242</b> |
| AK activity without effectors          | (AKs+AK-HSDHs+TS1+TD1)/BCAT1          | 0.0300         | 0.9343        |
| <b>AK activity without effectors</b>   | <b>(AKs+DHDPSs)/LKR-SDH1</b>          | <b>0.6711</b>  | <b>0.0336</b> |
| AK activity without effectors          | AK1                                   | -0.2533        | 0.4801        |
| <b>AK activity without effectors</b>   | <b>AK1+AK2</b>                        | <b>0.4593</b>  | <b>0.1818</b> |
| AK activity without effectors          | AK1+AK3                               | -0.2882        | 0.4194        |

|                                                      |                                        |                |               |
|------------------------------------------------------|----------------------------------------|----------------|---------------|
| <b>AK activity without effectors</b>                 | <b>AK2</b>                             | <b>0.4954</b>  | <b>0.1454</b> |
| <b>AK activity without effectors</b>                 | <b>AK2+AK3</b>                         | <b>0.4678</b>  | <b>0.1727</b> |
| AK activity without effectors                        | AK3                                    | -0.0812        | 0.8234        |
| AK activity without effectors                        | AK-HSDH1                               | 0.3656         | 0.2988        |
| AK activity without effectors                        | AK-HSDH2                               | 0.0179         | 0.9609        |
| AK activity without effectors                        | AK-HSDHs                               | 0.2181         | 0.5449        |
| AK activity without effectors                        | AK-HSDHs+CGS1                          | 0.3713         | 0.2908        |
| AK activity without effectors                        | AK-HSDHs+TS1                           | 0.3669         | 0.2971        |
| AK activity without effectors                        | AK-HSDHs+TS1+TD1                       | 0.3317         | 0.3491        |
| AK activity without effectors                        | AK-HSDHs+TS1+THAs                      | 0.3766         | 0.2834        |
| <b>AK activity without effectors</b>                 | <b>AKs</b>                             | <b>0.4363</b>  | <b>0.2075</b> |
| AK activity without effectors                        | AKs/AK-HSDHs                           | 0.0992         | 0.7850        |
| <b>AK activity without effectors</b>                 | <b>AKs+AK-HSDHs</b>                    | <b>0.5104</b>  | <b>0.1317</b> |
| <b>AK activity without effectors</b>                 | <b>AKs+AK-HSDHs+CGS1</b>               | <b>0.5888</b>  | <b>0.0733</b> |
| <b>AK activity without effectors</b>                 | <b>AKs+AK-HSDHs+DHDPSs</b>             | <b>0.5008</b>  | <b>0.1404</b> |
| <b>AK activity without effectors</b>                 | <b>AKs+AK-HSDHs+TS1</b>                | <b>0.5813</b>  | <b>0.0780</b> |
| <b>AK activity without effectors</b>                 | <b>AKs+AK-HSDHs+TS1+TD1</b>            | <b>0.5576</b>  | <b>0.0940</b> |
| <b>AK activity without effectors</b>                 | <b>AKs+AK-HSDHs+TS1+THAs</b>           | <b>0.5861</b>  | <b>0.0749</b> |
| <b>AK activity without effectors</b>                 | <b>AKs+DHDPSs</b>                      | <b>0.4296</b>  | <b>0.2153</b> |
| <b>AK activity without effectors</b>                 | <b>BCAT1</b>                           | <b>0.4539</b>  | <b>0.1876</b> |
| <b>AK activity without effectors</b>                 | <b>Biosynthetic genes analyzed</b>     | <b>0.6005</b>  | <b>0.0664</b> |
| AK activity without effectors                        | Catabolic genes analyzed               | 0.1170         | 0.7475        |
| <b>AK activity without effectors</b>                 | <b>CGS1</b>                            | <b>0.4636</b>  | <b>0.1772</b> |
| AK activity without effectors                        | CGS1/SAMSs                             | 0.1079         | 0.7666        |
| AK activity without effectors                        | CGS1/TS1                               | -0.0495        | 0.8921        |
| AK activity without effectors                        | DHDPS1                                 | -0.2885        | 0.4188        |
| AK activity without effectors                        | DHDPS2                                 | 0.0743         | 0.8384        |
| AK activity without effectors                        | DHDPSs                                 | -0.1312        | 0.7178        |
| AK activity without effectors                        | DHDPSs/AK-HSDHs                        | -0.2823        | 0.4294        |
| AK activity without effectors                        | DHDPSs/LKR-SDH1                        | 0.2030         | 0.5738        |
| AK activity without effectors                        | LKR-SDH1                               | -0.2997        | 0.4001        |
| <b>AK activity without effectors</b>                 | <b>SAMS1</b>                           | <b>-0.4686</b> | <b>0.1719</b> |
| AK activity without effectors                        | SAMS2                                  | -0.1066        | 0.7695        |
| AK activity without effectors                        | SAMS3                                  | 0.3436         | 0.3310        |
| AK activity without effectors                        | SAMS4                                  | 0.1787         | 0.6214        |
| AK activity without effectors                        | SAMSs                                  | 0.1136         | 0.7547        |
| AK activity without effectors                        | TD1                                    | -0.1036        | 0.7758        |
| AK activity without effectors                        | TD1/BCAT1                              | -0.0054        | 0.9881        |
| <b>AK activity without effectors</b>                 | <b>THA1</b>                            | <b>-0.4482</b> | <b>0.1939</b> |
| <b>AK activity without effectors</b>                 | <b>THA2</b>                            | <b>0.6083</b>  | <b>0.0620</b> |
| <b>AK activity without effectors</b>                 | <b>THAs</b>                            | <b>0.5505</b>  | <b>0.0992</b> |
| AK activity without effectors                        | THAs+TD1                               | 0.0106         | 0.9767        |
| AK activity without effectors                        | TS1                                    | 0.3835         | 0.2740        |
| AK activity without effectors                        | TS1/(THAs+TD1)                         | 0.3532         | 0.3167        |
| AK activity without effectors                        | TS1/TD1                                | 0.3559         | 0.3128        |
| AK activity without effectors                        | TS1/THAs                               | -0.2188        | 0.5437        |
| AK activity/HSDH activity with four effectors        | (AK-HSDHs+CGS1)/SAMSs                  | -0.0623        | 0.8643        |
| AK activity/HSDH activity with four effectors        | (AK-HSDHs+TS1)/(THAs+TD1)              | 0.0210         | 0.9541        |
| AK activity/HSDH activity with four effectors        | (AK-HSDHs+TS1+TD1)/BCAT1               | -0.1737        | 0.6313        |
| <b>AK activity/HSDH activity with four effectors</b> | <b>(AKs+AK-HSDHs)/AK-HSDHs</b>         | <b>0.5083</b>  | <b>0.1336</b> |
| <b>AK activity/HSDH activity with four effectors</b> | <b>(AKs+AK-HSDHs+CGS1)/SAMSs</b>       | <b>0.4859</b>  | <b>0.1545</b> |
| <b>AK activity/HSDH activity with four effectors</b> | <b>(AKs+AK-HSDHs+DHDPSs)/LKR-SDH1</b>  | <b>0.4637</b>  | <b>0.1771</b> |
| <b>AK activity/HSDH activity with four effectors</b> | <b>(AKs+AK-HSDHs+TS1)/(THAs+TD1)</b>   | <b>0.4147</b>  | <b>0.2334</b> |
| AK activity/HSDH activity with four effectors        | (AKs+AK-HSDHs+TS1+TD1)/BCAT1           | -0.1420        | 0.6956        |
| <b>AK activity/HSDH activity with four effectors</b> | <b>(AKs+DHDPSs)/LKR-SDH1</b>           | <b>0.6294</b>  | <b>0.0512</b> |
| <b>AK activity/HSDH activity with four effectors</b> | <b>AK activity with four effectors</b> | <b>0.7230</b>  | <b>0.0181</b> |
| <b>AK activity/HSDH activity with four effectors</b> | <b>AK activity without effectors</b>   | <b>0.6188</b>  | <b>0.0565</b> |

|                                                      |                                                    |                |                  |
|------------------------------------------------------|----------------------------------------------------|----------------|------------------|
| <b>AK activity/HSDH activity with four effectors</b> | <b>AK activity/HSDH activity without effectors</b> | <b>0.9355</b>  | <b>&lt;.0001</b> |
| AK activity/HSDH activity with four effectors        | <i>AK1</i>                                         | -0.0347        | 0.9241           |
| <b>AK activity/HSDH activity with four effectors</b> | <b><i>AK1+AK2</i></b>                              | <b>0.7399</b>  | <b>0.0144</b>    |
| AK activity/HSDH activity with four effectors        | <i>AK1+AK3</i>                                     | -0.0126        | 0.9724           |
| <b>AK activity/HSDH activity with four effectors</b> | <b><i>AK2</i></b>                                  | <b>0.7210</b>  | <b>0.0186</b>    |
| <b>AK activity/HSDH activity with four effectors</b> | <b><i>AK2+AK3</i></b>                              | <b>0.7040</b>  | <b>0.0231</b>    |
| AK activity/HSDH activity with four effectors        | <i>AK3</i>                                         | 0.0133         | 0.9709           |
| AK activity/HSDH activity with four effectors        | <i>AK-HSDH1</i>                                    | -0.2882        | 0.4194           |
| AK activity/HSDH activity with four effectors        | <i>AK-HSDH2</i>                                    | -0.0264        | 0.9423           |
| AK activity/HSDH activity with four effectors        | <i>AK-HSDHs</i>                                    | -0.1807        | 0.6173           |
| AK activity/HSDH activity with four effectors        | <i>AK-HSDHs+CGS1</i>                               | -0.0745        | 0.8379           |
| AK activity/HSDH activity with four effectors        | <i>AK-HSDHs+TS1</i>                                | -0.0856        | 0.8141           |
| AK activity/HSDH activity with four effectors        | <i>AK-HSDHs+TS1+TD1</i>                            | -0.0926        | 0.7992           |
| AK activity/HSDH activity with four effectors        | <i>AK-HSDHs+TS1+THAs</i>                           | -0.0805        | 0.8250           |
| <b>AK activity/HSDH activity with four effectors</b> | <b><i>AKs</i></b>                                  | <b>0.7300</b>  | <b>0.0165</b>    |
| <b>AK activity/HSDH activity with four effectors</b> | <b><i>AKs/AK-HSDHs</i></b>                         | <b>0.5083</b>  | <b>0.1336</b>    |
| <b>AK activity/HSDH activity with four effectors</b> | <b><i>AKs+AK-HSDHs</i></b>                         | <b>0.7104</b>  | <b>0.0213</b>    |
| <b>AK activity/HSDH activity with four effectors</b> | <b><i>AKs+AK-HSDHs+CGS1</i></b>                    | <b>0.6844</b>  | <b>0.0290</b>    |
| <b>AK activity/HSDH activity with four effectors</b> | <b><i>AKs+AK-HSDHs+DHDPSs</i></b>                  | <b>0.6987</b>  | <b>0.0246</b>    |
| <b>AK activity/HSDH activity with four effectors</b> | <b><i>AKs+AK-HSDHs+TS1</i></b>                     | <b>0.5411</b>  | <b>0.1063</b>    |
| <b>AK activity/HSDH activity with four effectors</b> | <b><i>AKs+AK-HSDHs+TS1+TD1</i></b>                 | <b>0.5172</b>  | <b>0.1258</b>    |
| <b>AK activity/HSDH activity with four effectors</b> | <b><i>AKs+AK-HSDHs+TS1+THAs</i></b>                | <b>0.5442</b>  | <b>0.1039</b>    |
| <b>AK activity/HSDH activity with four effectors</b> | <b><i>AKs+DHDPSs</i></b>                           | <b>0.7216</b>  | <b>0.0185</b>    |
| AK activity/HSDH activity with four effectors        | <i>BCAT1</i>                                       | 0.2989         | 0.4016           |
| <b>AK activity/HSDH activity with four effectors</b> | <b>Biosynthetic genes analyzed</b>                 | <b>0.4949</b>  | <b>0.1459</b>    |
| AK activity/HSDH activity with four effectors        | Catabolic genes analyzed                           | -0.0555        | 0.8790           |
| AK activity/HSDH activity with four effectors        | <i>CGS1</i>                                        | 0.0606         | 0.8679           |
| AK activity/HSDH activity with four effectors        | <i>CGS1/SAMSs</i>                                  | 0.0289         | 0.9369           |
| AK activity/HSDH activity with four effectors        | <i>CGS1/TS1</i>                                    | 0.1984         | 0.5826           |
| AK activity/HSDH activity with four effectors        | <i>DHDPS1</i>                                      | -0.3238        | 0.3614           |
| AK activity/HSDH activity with four effectors        | <i>DHDPS2</i>                                      | 0.0494         | 0.8921           |
| AK activity/HSDH activity with four effectors        | <i>DHDPSs</i>                                      | -0.1476        | 0.6841           |
| AK activity/HSDH activity with four effectors        | <i>DHDPSs/AK-HSDHs</i>                             | 0.1074         | 0.7677           |
| AK activity/HSDH activity with four effectors        | <i>DHDPSs/LKR-SDH1</i>                             | -0.0930        | 0.7982           |
| AK activity/HSDH activity with four effectors        | HSDH activity with four effectors                  | -0.3735        | 0.2877           |
| <b>AK activity/HSDH activity with four effectors</b> | <b>HSDH activity without effectors</b>             | <b>-0.4403</b> | <b>0.2028</b>    |
| AK activity/HSDH activity with four effectors        | <i>LKR-SDH1</i>                                    | -0.0884        | 0.8081           |
| AK activity/HSDH activity with four effectors        | <i>SAMS1</i>                                       | -0.3626        | 0.3031           |
| AK activity/HSDH activity with four effectors        | <i>SAMS2</i>                                       | -0.1985        | 0.5825           |
| AK activity/HSDH activity with four effectors        | <i>SAMS3</i>                                       | 0.1163         | 0.7491           |
| AK activity/HSDH activity with four effectors        | <i>SAMS4</i>                                       | -0.0533        | 0.8838           |
| AK activity/HSDH activity with four effectors        | <i>SAMSs</i>                                       | -0.0576        | 0.8744           |
| AK activity/HSDH activity with four effectors        | <i>TD1</i>                                         | -0.1356        | 0.7089           |
| AK activity/HSDH activity with four effectors        | <i>TD1/BCAT1</i>                                   | -0.1899        | 0.5993           |
| AK activity/HSDH activity with four effectors        | <i>THA1</i>                                        | -0.3911        | 0.2638           |
| AK activity/HSDH activity with four effectors        | <i>THA2</i>                                        | 0.3151         | 0.3752           |
| AK activity/HSDH activity with four effectors        | <i>THAs</i>                                        | 0.3572         | 0.3109           |
| AK activity/HSDH activity with four effectors        | <i>THAs+TD1</i>                                    | -0.0757        | 0.8353           |
| AK activity/HSDH activity with four effectors        | <i>TS1</i>                                         | -0.0332        | 0.9275           |
| AK activity/HSDH activity with four effectors        | <i>TS1/(THAs+TD1)</i>                              | 0.0308         | 0.9328           |
| AK activity/HSDH activity with four effectors        | <i>TS1/TD1</i>                                     | 0.0619         | 0.8651           |
| AK activity/HSDH activity with four effectors        | <i>TS1/THAs</i>                                    | -0.3809        | 0.2775           |
| AK activity/HSDH activity without effectors          | <i>(AK-HSDHs+CGS1)/SAMSs</i>                       | 0.0783         | 0.8297           |
| AK activity/HSDH activity without effectors          | <i>(AK-HSDHs+TS1)/(THAs+TD1)</i>                   | -0.1170        | 0.7474           |
| AK activity/HSDH activity without effectors          | <i>(AK-HSDHs+TS1+TD1)/BCAT1</i>                    | -0.2284        | 0.5255           |
| <b>AK activity/HSDH activity without effectors</b>   | <b><i>(AKs+AK-HSDHs)/AK-HSDHs</i></b>              | <b>0.6493</b>  | <b>0.0422</b>    |
| <b>AK activity/HSDH activity without effectors</b>   | <b><i>(AKs+AK-HSDHs+CGS1)/SAMSs</i></b>            | <b>0.6303</b>  | <b>0.0507</b>    |

|                                                    |                                          |                |               |
|----------------------------------------------------|------------------------------------------|----------------|---------------|
| <b>AK activity/HSDH activity without effectors</b> | <b>(AKs+AK-HSDHs+DHDPSs)/LKR-SDHI</b>    | <b>0.4170</b>  | <b>0.2306</b> |
| AK activity/HSDH activity without effectors        | (AKs+AK-HSDHs+TS1)/(THAs+TD1)            | 0.3560         | 0.3127        |
| AK activity/HSDH activity without effectors        | (AKs+AK-HSDHs+TS1+TD1)/BCAT1             | -0.1900        | 0.5990        |
| <b>AK activity/HSDH activity without effectors</b> | <b>(AKs+DHDPSs)/LKR-SDHI</b>             | <b>0.6019</b>  | <b>0.0656</b> |
| <b>AK activity/HSDH activity without effectors</b> | <b>AK activity with four effectors</b>   | <b>0.5956</b>  | <b>0.0692</b> |
| <b>AK activity/HSDH activity without effectors</b> | <b>AK activity without effectors</b>     | <b>0.4796</b>  | <b>0.1607</b> |
| AK activity/HSDH activity without effectors        | AK1                                      | -0.2059        | 0.5683        |
| <b>AK activity/HSDH activity without effectors</b> | <b>AK1+AK2</b>                           | <b>0.7770</b>  | <b>0.0082</b> |
| AK activity/HSDH activity without effectors        | AK1+AK3                                  | 0.0294         | 0.9357        |
| <b>AK activity/HSDH activity without effectors</b> | <b>AK2</b>                               | <b>0.7924</b>  | <b>0.0063</b> |
| <b>AK activity/HSDH activity without effectors</b> | <b>AK2+AK3</b>                           | <b>0.8173</b>  | <b>0.0039</b> |
| AK activity/HSDH activity without effectors        | AK3                                      | 0.2678         | 0.4544        |
| <b>AK activity/HSDH activity without effectors</b> | <b>AK-HSDHI</b>                          | <b>-0.4704</b> | <b>0.1700</b> |
| AK activity/HSDH activity without effectors        | AK-HSDH2                                 | 0.0218         | 0.9524        |
| AK activity/HSDH activity without effectors        | AK-HSDHs                                 | -0.2527        | 0.4812        |
| AK activity/HSDH activity without effectors        | AK-HSDHs+CGS1                            | -0.1290        | 0.7226        |
| AK activity/HSDH activity without effectors        | AK-HSDHs+TS1                             | -0.1602        | 0.6585        |
| AK activity/HSDH activity without effectors        | AK-HSDHs+TS1+TD1                         | -0.1559        | 0.6670        |
| AK activity/HSDH activity without effectors        | AK-HSDHs+TS1+THAs                        | -0.1545        | 0.6700        |
| <b>AK activity/HSDH activity without effectors</b> | <b>AKs</b>                               | <b>0.8125</b>  | <b>0.0043</b> |
| <b>AK activity/HSDH activity without effectors</b> | <b>AKs/AK-HSDHs</b>                      | <b>0.6493</b>  | <b>0.0422</b> |
| <b>AK activity/HSDH activity without effectors</b> | <b>AKs+AK-HSDHs</b>                      | <b>0.7770</b>  | <b>0.0082</b> |
| <b>AK activity/HSDH activity without effectors</b> | <b>AKs+AK-HSDHs+CGS1</b>                 | <b>0.7417</b>  | <b>0.0141</b> |
| <b>AK activity/HSDH activity without effectors</b> | <b>AKs+AK-HSDHs+DHDPSs</b>               | <b>0.7644</b>  | <b>0.0100</b> |
| <b>AK activity/HSDH activity without effectors</b> | <b>AKs+AK-HSDHs+TS1</b>                  | <b>0.5623</b>  | <b>0.0906</b> |
| <b>AK activity/HSDH activity without effectors</b> | <b>AKs+AK-HSDHs+TS1+TD1</b>              | <b>0.5418</b>  | <b>0.1057</b> |
| <b>AK activity/HSDH activity without effectors</b> | <b>AKs+AK-HSDHs+TS1+THAs</b>             | <b>0.5654</b>  | <b>0.0885</b> |
| <b>AK activity/HSDH activity without effectors</b> | <b>AKs+DHDPSs</b>                        | <b>0.8035</b>  | <b>0.0051</b> |
| AK activity/HSDH activity without effectors        | BCAT1                                    | 0.1217         | 0.7377        |
| <b>AK activity/HSDH activity without effectors</b> | <b>Biosynthetic genes analyzed</b>       | <b>0.5096</b>  | <b>0.1324</b> |
| AK activity/HSDH activity without effectors        | Catabolic genes analyzed                 | -0.1611        | 0.6565        |
| AK activity/HSDH activity without effectors        | CGS1                                     | 0.0362         | 0.9208        |
| AK activity/HSDH activity without effectors        | CGS1/SAMSs                               | 0.1852         | 0.6085        |
| AK activity/HSDH activity without effectors        | CGS1/TS1                                 | 0.3241         | 0.3609        |
| AK activity/HSDH activity without effectors        | DHDPS1                                   | -0.3107        | 0.3822        |
| AK activity/HSDH activity without effectors        | DHDPS2                                   | 0.0277         | 0.9394        |
| AK activity/HSDH activity without effectors        | DHDPSs                                   | -0.1571        | 0.6647        |
| AK activity/HSDH activity without effectors        | DHDPSs/AK-HSDHs                          | 0.2248         | 0.5323        |
| AK activity/HSDH activity without effectors        | DHDPSs/LKR-SDHI                          | -0.1866        | 0.6057        |
| <b>AK activity/HSDH activity without effectors</b> | <b>HSDH activity with four effectors</b> | <b>-0.4401</b> | <b>0.2031</b> |
| <b>AK activity/HSDH activity without effectors</b> | <b>HSDH activity without effectors</b>   | <b>-0.6251</b> | <b>0.0533</b> |
| AK activity/HSDH activity without effectors        | LKR-SDHI                                 | 0.0270         | 0.9409        |
| AK activity/HSDH activity without effectors        | SAMS1                                    | -0.2100        | 0.5604        |
| AK activity/HSDH activity without effectors        | SAMS2                                    | -0.1162        | 0.7492        |
| AK activity/HSDH activity without effectors        | SAMS3                                    | -0.0936        | 0.7970        |
| AK activity/HSDH activity without effectors        | SAMS4                                    | -0.1097        | 0.7628        |
| AK activity/HSDH activity without effectors        | SAMSs                                    | -0.1631        | 0.6526        |
| AK activity/HSDH activity without effectors        | TD1                                      | -0.0726        | 0.8420        |
| AK activity/HSDH activity without effectors        | TD1/BCAT1                                | -0.2389        | 0.5062        |
| AK activity/HSDH activity without effectors        | THA1                                     | -0.2968        | 0.4049        |
| AK activity/HSDH activity without effectors        | THA2                                     | 0.3350         | 0.3440        |
| AK activity/HSDH activity without effectors        | THAs                                     | 0.3930         | 0.2613        |
| AK activity/HSDH activity without effectors        | THAs+TD1                                 | -0.0111        | 0.9757        |
| AK activity/HSDH activity without effectors        | TS1                                      | -0.0992        | 0.7851        |
| AK activity/HSDH activity without effectors        | TS1/(THAs+TD1)                           | -0.1284        | 0.7237        |
| AK activity/HSDH activity without effectors        | TS1/TD1                                  | -0.0340        | 0.9258        |
| <b>AK activity/HSDH activity without effectors</b> | <b>TS1/THAs</b>                          | <b>-0.4554</b> | <b>0.1859</b> |

|                       |                                    |                |                  |
|-----------------------|------------------------------------|----------------|------------------|
| <i>AK1+AK2</i>        | <i>AK1</i>                         | -0.0680        | 0.8520           |
| <i>AK1+AK2</i>        | <i>AK1+AK3</i>                     | -0.0534        | 0.8836           |
| <b><i>AK1+AK2</i></b> | <b><i>AK2</i></b>                  | <b>0.9782</b>  | <b>&lt;.0001</b> |
| <b><i>AK1+AK2</i></b> | <b><i>AK2+AK3</i></b>              | <b>0.9525</b>  | <b>&lt;.0001</b> |
| <i>AK1+AK2</i>        | <i>AK3</i>                         | 0.0015         | 0.9968           |
| <b><i>AK1+AK2</i></b> | <b><i>AK-HSDH1</i></b>             | <b>-0.4794</b> | <b>0.1610</b>    |
| <i>AK1+AK2</i>        | <i>AK-HSDH2</i>                    | -0.0490        | 0.8931           |
| <i>AK1+AK2</i>        | <i>AK-HSDHs</i>                    | -0.3003        | 0.3993           |
| <b><i>AK1+AK2</i></b> | <b><i>AKs</i></b>                  | <b>0.9833</b>  | <b>&lt;.0001</b> |
| <b><i>AK1+AK2</i></b> | <b><i>AKs+AK-HSDHs</i></b>         | <b>0.9418</b>  | <b>&lt;.0001</b> |
| <i>AK1+AK2</i>        | <i>BCAT1</i>                       | -0.0566        | 0.8765           |
| <b><i>AK1+AK2</i></b> | <b>Biosynthetic genes analyzed</b> | <b>0.6795</b>  | <b>0.0307</b>    |
| <i>AK1+AK2</i>        | Catabolic genes analyzed           | -0.3384        | 0.3389           |
| <i>AK1+AK2</i>        | <i>CGS1</i>                        | -0.0341        | 0.9255           |
| <i>AK1+AK2</i>        | <i>DHDPS1</i>                      | 0.1032         | 0.7766           |
| <i>AK1+AK2</i>        | <i>DHDPS2</i>                      | -0.0303        | 0.9339           |
| <i>AK1+AK2</i>        | <i>DHDPSs</i>                      | 0.0433         | 0.9055           |
| <i>AK1+AK2</i>        | <i>LKR-SDH1</i>                    | 0.2791         | 0.4348           |
| <i>AK1+AK2</i>        | <i>SAMS1</i>                       | -0.3232        | 0.3623           |
| <i>AK1+AK2</i>        | <i>SAMS2</i>                       | 0.0725         | 0.8423           |
| <i>AK1+AK2</i>        | <i>SAMS3</i>                       | -0.2420        | 0.5005           |
| <i>AK1+AK2</i>        | <i>SAMS4</i>                       | -0.3061        | 0.3897           |
| <i>AK1+AK2</i>        | <i>SAMSs</i>                       | -0.3406        | 0.3355           |
| <i>AK1+AK2</i>        | <i>TD1</i>                         | -0.0540        | 0.8822           |
| <i>AK1+AK2</i>        | <i>THA1</i>                        | -0.0483        | 0.8946           |
| <b><i>AK1+AK2</i></b> | <b><i>THA2</i></b>                 | <b>0.4729</b>  | <b>0.1675</b>    |
| <b><i>AK1+AK2</i></b> | <b><i>THAs</i></b>                 | <b>0.5505</b>  | <b>0.0991</b>    |
| <i>AK1+AK2</i>        | <i>THAs+TD1</i>                    | 0.0430         | 0.9062           |
| <i>AK1+AK2</i>        | <i>TS1</i>                         | 0.0410         | 0.9105           |
| <b><i>AK1+AK3</i></b> | <b><i>AK1</i></b>                  | <b>0.6618</b>  | <b>0.0371</b>    |
| <i>AK1+AK3</i>        | <i>AK2</i>                         | -0.1891        | 0.6008           |
| <i>AK1+AK3</i>        | <i>AK2+AK3</i>                     | -0.0955        | 0.7930           |
| <b><i>AK1+AK3</i></b> | <b><i>AK3</i></b>                  | <b>0.4923</b>  | <b>0.1483</b>    |
| <i>AK1+AK3</i>        | <i>AK-HSDH1</i>                    | 0.0220         | 0.9520           |
| <i>AK1+AK3</i>        | <i>AK-HSDH2</i>                    | 0.3268         | 0.3568           |
| <i>AK1+AK3</i>        | <i>AK-HSDHs</i>                    | 0.2214         | 0.5387           |
| <i>AK1+AK3</i>        | <i>AKs</i>                         | 0.0389         | 0.9151           |
| <i>AK1+AK3</i>        | <i>AKs+AK-HSDHs</i>                | 0.0991         | 0.7853           |
| <i>AK1+AK3</i>        | <i>BCAT1</i>                       | -0.1057        | 0.7714           |
| <i>AK1+AK3</i>        | Biosynthetic genes analyzed        | -0.0406        | 0.9114           |
| <i>AK1+AK3</i>        | Catabolic genes analyzed           | 0.1867         | 0.6055           |
| <i>AK1+AK3</i>        | <i>CGS1</i>                        | -0.3729        | 0.2885           |
| <i>AK1+AK3</i>        | <i>DHDPS1</i>                      | 0.1550         | 0.6689           |
| <i>AK1+AK3</i>        | <i>DHDPS2</i>                      | 0.0697         | 0.8482           |
| <i>AK1+AK3</i>        | <i>DHDPSs</i>                      | 0.1743         | 0.6301           |
| <i>AK1+AK3</i>        | <i>LKR-SDH1</i>                    | 0.0119         | 0.9740           |
| <i>AK1+AK3</i>        | <i>SAMS1</i>                       | 0.0325         | 0.9289           |
| <i>AK1+AK3</i>        | <i>SAMS2</i>                       | 0.0787         | 0.8290           |
| <i>AK1+AK3</i>        | <i>SAMS3</i>                       | 0.2206         | 0.5403           |
| <i>AK1+AK3</i>        | <i>SAMS4</i>                       | 0.0927         | 0.7990           |
| <i>AK1+AK3</i>        | <i>SAMSs</i>                       | 0.1884         | 0.6021           |
| <i>AK1+AK3</i>        | <i>TD1</i>                         | 0.0846         | 0.8163           |
| <i>AK1+AK3</i>        | <i>THA1</i>                        | -0.1250        | 0.7309           |
| <b><i>AK1+AK3</i></b> | <b><i>THA2</i></b>                 | <b>-0.5284</b> | <b>0.1164</b>    |
| <b><i>AK1+AK3</i></b> | <b><i>THAs</i></b>                 | <b>-0.4794</b> | <b>0.1609</b>    |
| <i>AK1+AK3</i>        | <i>THAs+TD1</i>                    | -0.0186        | 0.9594           |
| <i>AK1+AK3</i>        | <i>TS1</i>                         | -0.1204        | 0.7403           |



|                 |                                    |                |                  |
|-----------------|------------------------------------|----------------|------------------|
| AK2             | AK1                                | -0.2735        | 0.4445           |
| AK2+AK3         | AK1                                | -0.3198        | 0.3677           |
| <b>AK2+AK3</b>  | <b>AK2</b>                         | <b>0.9848</b>  | <b>&lt;.0001</b> |
| AK2+AK3         | AK3                                | 0.2414         | 0.5017           |
| <b>AK2+AK3</b>  | <b>AK-HSDH1</b>                    | <b>-0.4771</b> | <b>0.1632</b>    |
| AK2+AK3         | AK-HSDH2                           | -0.0168        | 0.9632           |
| AK2+AK3         | AK-HSDHs                           | -0.2792        | 0.4347           |
| <b>AK2+AK3</b>  | <b>AKs</b>                         | <b>0.9799</b>  | <b>&lt;.0001</b> |
| <b>AK2+AK3</b>  | <b>AKs+AK-HSDHs</b>                | <b>0.9437</b>  | <b>&lt;.0001</b> |
| AK2+AK3         | BCAT1                              | -0.1159        | 0.7498           |
| <b>AK2+AK3</b>  | <b>Biosynthetic genes analyzed</b> | <b>0.7240</b>  | <b>0.0179</b>    |
| AK2+AK3         | Catabolic genes analyzed           | -0.3259        | 0.3581           |
| AK2+AK3         | CGS1                               | 0.0420         | 0.9082           |
| AK2+AK3         | DHDPS1                             | 0.0854         | 0.8146           |
| AK2+AK3         | DHDPS2                             | 0.0017         | 0.9963           |
| AK2+AK3         | DHDPSs                             | 0.0512         | 0.8882           |
| AK2+AK3         | LKR-SDH1                           | 0.3157         | 0.3742           |
| AK2+AK3         | SAMS1                              | -0.1793        | 0.6202           |
| AK2+AK3         | SAMS2                              | 0.1802         | 0.6183           |
| AK2+AK3         | SAMS3                              | -0.3204        | 0.3668           |
| AK2+AK3         | SAMS4                              | -0.2258        | 0.5304           |
| AK2+AK3         | SAMSs                              | -0.3291        | 0.3531           |
| AK2+AK3         | TD1                                | 0.0526         | 0.8853           |
| AK2+AK3         | THA1                               | -0.0163        | 0.9644           |
| <b>AK2+AK3</b>  | <b>THA2</b>                        | <b>0.5458</b>  | <b>0.1026</b>    |
| <b>AK2+AK3</b>  | <b>THAs</b>                        | <b>0.6176</b>  | <b>0.0571</b>    |
| AK2+AK3         | THAs+TD1                           | 0.1592         | 0.6605           |
| AK2+AK3         | TS1                                | 0.1108         | 0.7606           |
| AK3             | AK1                                | -0.3266        | 0.3570           |
| AK3             | AK2                                | 0.0693         | 0.8491           |
| AK-HSDH1        | AK1                                | 0.0812         | 0.8236           |
| <b>AK-HSDH1</b> | <b>AK2</b>                         | <b>-0.4794</b> | <b>0.1609</b>    |
| AK-HSDH1        | AK3                                | -0.0695        | 0.8486           |
| AK-HSDH2        | AK1                                | 0.1105         | 0.7613           |
| AK-HSDH2        | AK2                                | -0.0691        | 0.8495           |
| AK-HSDH2        | AK3                                | 0.2856         | 0.4238           |
| AK-HSDH2        | AK-HSDH1                           | 0.3527         | 0.3174           |
| AK-HSDHs        | AK1                                | 0.1181         | 0.7453           |
| AK-HSDHs        | AK2                                | -0.3135        | 0.3777           |
| AK-HSDHs        | AK3                                | 0.1416         | 0.6964           |
| <b>AK-HSDHs</b> | <b>AK-HSDH1</b>                    | <b>0.7926</b>  | <b>0.0062</b>    |
| <b>AK-HSDHs</b> | <b>AK-HSDH2</b>                    | <b>0.8501</b>  | <b>0.0018</b>    |
| AK-HSDHs        | AKs                                | -0.2694        | 0.4516           |
| AK-HSDHs        | AKs+AK-HSDHs                       | -0.0160        | 0.9649           |
| AK-HSDHs        | BCAT1                              | -0.0938        | 0.7966           |
| <b>AK-HSDHs</b> | <b>CGS1</b>                        | <b>0.6403</b>  | <b>0.0461</b>    |
| AK-HSDHs        | DHDPS1                             | -0.0782        | 0.8300           |
| <b>AK-HSDHs</b> | <b>DHDPS2</b>                      | <b>0.7538</b>  | <b>0.0118</b>    |
| <b>AK-HSDHs</b> | <b>LKR-SDH1</b>                    | <b>-0.7655</b> | <b>0.0099</b>    |
| AK-HSDHs        | SAMS1                              | 0.2522         | 0.4822           |
| AK-HSDHs        | SAMS2                              | 0.1636         | 0.6515           |
| <b>AK-HSDHs</b> | <b>SAMS3</b>                       | <b>0.8389</b>  | <b>0.0024</b>    |
| <b>AK-HSDHs</b> | <b>SAMS4</b>                       | <b>0.8532</b>  | <b>0.0017</b>    |
| <b>AK-HSDHs</b> | <b>TD1</b>                         | <b>0.4833</b>  | <b>0.1571</b>    |
| <b>AK-HSDHs</b> | <b>THA1</b>                        | <b>-0.5544</b> | <b>0.0963</b>    |
| AK-HSDHs        | THA2                               | -0.2885        | 0.4188           |
| <b>AK-HSDHs</b> | <b>TS1</b>                         | <b>0.5890</b>  | <b>0.0732</b>    |

|                             |                                    |                |               |
|-----------------------------|------------------------------------|----------------|---------------|
| <i>AK-HSDHs+CGSI</i>        | <i>AK1</i>                         | -0.1386        | 0.7026        |
| <i>AK-HSDHs+CGSI</i>        | <i>AK1+AK2</i>                     | -0.1944        | 0.5905        |
| <i>AK-HSDHs+CGSI</i>        | <i>AK1+AK3</i>                     | -0.0725        | 0.8423        |
| <i>AK-HSDHs+CGSI</i>        | <i>AK2</i>                         | -0.1578        | 0.6633        |
| <i>AK-HSDHs+CGSI</i>        | <i>AK2+AK3</i>                     | -0.1417        | 0.6961        |
| <i>AK-HSDHs+CGSI</i>        | <i>AK3</i>                         | 0.0691         | 0.8496        |
| <b><i>AK-HSDHs+CGSI</i></b> | <b><i>AK-HSDH1</i></b>             | <b>0.6701</b>  | <b>0.0340</b> |
| <b><i>AK-HSDHs+CGSI</i></b> | <b><i>AK-HSDH2</i></b>             | <b>0.8192</b>  | <b>0.0037</b> |
| <b><i>AK-HSDHs+CGSI</i></b> | <b><i>AK-HSDHs</i></b>             | <b>0.9122</b>  | <b>0.0002</b> |
| <i>AK-HSDHs+CGSI</i>        | <i>AKs</i>                         | -0.1790        | 0.6208        |
| <i>AK-HSDHs+CGSI</i>        | <i>AKs+AK-HSDHs</i>                | 0.0548         | 0.8805        |
| <i>AK-HSDHs+CGSI</i>        | <i>AKs+AK-HSDHs+CGSI</i>           | 0.2567         | 0.4739        |
| <i>AK-HSDHs+CGSI</i>        | <i>AKs+AK-HSDHs+DHDPSs</i>         | 0.0733         | 0.8405        |
| <i>AK-HSDHs+CGSI</i>        | <i>AKs+DHDPSs</i>                  | -0.1579        | 0.6630        |
| <i>AK-HSDHs+CGSI</i>        | <i>BCAT1</i>                       | -0.2044        | 0.5711        |
| <b><i>AK-HSDHs+CGSI</i></b> | <b>Biosynthetic genes analyzed</b> | <b>0.4934</b>  | <b>0.1472</b> |
| <b><i>AK-HSDHs+CGSI</i></b> | <b>Catabolic genes analyzed</b>    | <b>0.8328</b>  | <b>0.0028</b> |
| <b><i>AK-HSDHs+CGSI</i></b> | <b><i>CGSI</i></b>                 | <b>0.8988</b>  | <b>0.0004</b> |
| <i>AK-HSDHs+CGSI</i>        | <i>DHDPS1</i>                      | -0.1091        | 0.7641        |
| <b><i>AK-HSDHs+CGSI</i></b> | <b><i>DHDPS2</i></b>               | <b>0.8102</b>  | <b>0.0045</b> |
| <b><i>AK-HSDHs+CGSI</i></b> | <b><i>DHDPSs</i></b>               | <b>0.4856</b>  | <b>0.1548</b> |
| <b><i>AK-HSDHs+CGSI</i></b> | <b><i>LKR-SDHI</i></b>             | <b>-0.7948</b> | <b>0.0060</b> |
| <i>AK-HSDHs+CGSI</i>        | <i>SAMS1</i>                       | 0.3476         | 0.3251        |
| <i>AK-HSDHs+CGSI</i>        | <i>SAMS2</i>                       | 0.2417         | 0.5011        |
| <b><i>AK-HSDHs+CGSI</i></b> | <b><i>SAMS3</i></b>                | <b>0.7589</b>  | <b>0.0109</b> |
| <b><i>AK-HSDHs+CGSI</i></b> | <b><i>SAMS4</i></b>                | <b>0.8784</b>  | <b>0.0008</b> |
| <b><i>AK-HSDHs+CGSI</i></b> | <b><i>SAMSs</i></b>                | <b>0.8326</b>  | <b>0.0028</b> |
| <b><i>AK-HSDHs+CGSI</i></b> | <b><i>TD1</i></b>                  | <b>0.5644</b>  | <b>0.0892</b> |
| <b><i>AK-HSDHs+CGSI</i></b> | <b><i>THA1</i></b>                 | <b>-0.7042</b> | <b>0.0230</b> |
| <i>AK-HSDHs+CGSI</i>        | <i>THA2</i>                        | 0.0514         | 0.8878        |
| <i>AK-HSDHs+CGSI</i>        | <i>THAs</i>                        | -0.0662        | 0.8558        |
| <b><i>AK-HSDHs+CGSI</i></b> | <b><i>THAs+TD1</i></b>             | <b>0.5373</b>  | <b>0.1092</b> |
| <b><i>AK-HSDHs+CGSI</i></b> | <b><i>TS1</i></b>                  | <b>0.6734</b>  | <b>0.0328</b> |
| <i>AK-HSDHs+TS1</i>         | <i>AK1</i>                         | -0.1502        | 0.6788        |
| <i>AK-HSDHs+TS1</i>         | <i>AK1+AK2</i>                     | -0.0710        | 0.8454        |
| <i>AK-HSDHs+TS1</i>         | <i>AK1+AK3</i>                     | -0.0166        | 0.9637        |
| <i>AK-HSDHs+TS1</i>         | <i>AK2</i>                         | -0.0375        | 0.9180        |
| <i>AK-HSDHs+TS1</i>         | <i>AK2+AK3</i>                     | -0.0101        | 0.9779        |
| <i>AK-HSDHs+TS1</i>         | <i>AK3</i>                         | 0.1486         | 0.6820        |
| <b><i>AK-HSDHs+TS1</i></b>  | <b><i>AK-HSDH1</i></b>             | <b>0.6649</b>  | <b>0.0359</b> |
| <b><i>AK-HSDHs+TS1</i></b>  | <b><i>AK-HSDH2</i></b>             | <b>0.6329</b>  | <b>0.0495</b> |
| <b><i>AK-HSDHs+TS1</i></b>  | <b><i>AK-HSDHs</i></b>             | <b>0.7879</b>  | <b>0.0068</b> |
| <b><i>AK-HSDHs+TS1</i></b>  | <b><i>AK-HSDHs+CGSI</i></b>        | <b>0.8230</b>  | <b>0.0034</b> |
| <i>AK-HSDHs+TS1</i>         | <i>AKs</i>                         | -0.0431        | 0.9058        |
| <i>AK-HSDHs+TS1</i>         | <i>AKs+AK-HSDHs</i>                | 0.1626         | 0.6536        |
| <i>AK-HSDHs+TS1</i>         | <i>AKs+AK-HSDHs+CGSI</i>           | 0.3145         | 0.3761        |
| <i>AK-HSDHs+TS1</i>         | <i>AKs+AK-HSDHs+DHDPSs</i>         | 0.1897         | 0.5996        |
| <b><i>AK-HSDHs+TS1</i></b>  | <b><i>AKs+AK-HSDHs+TS1</i></b>     | <b>0.5810</b>  | <b>0.0782</b> |
| <i>AK-HSDHs+TS1</i>         | <i>AKs+DHDPSs</i>                  | -0.0134        | 0.9708        |
| <i>AK-HSDHs+TS1</i>         | <i>BCAT1</i>                       | -0.2235        | 0.5349        |
| <b><i>AK-HSDHs+TS1</i></b>  | <b>Biosynthetic genes analyzed</b> | <b>0.6660</b>  | <b>0.0355</b> |
| <b><i>AK-HSDHs+TS1</i></b>  | <b>Catabolic genes analyzed</b>    | <b>0.7013</b>  | <b>0.0238</b> |
| <b><i>AK-HSDHs+TS1</i></b>  | <b><i>CGSI</i></b>                 | <b>0.7024</b>  | <b>0.0235</b> |
| <i>AK-HSDHs+TS1</i>         | <i>DHDPS1</i>                      | 0.3110         | 0.3818        |
| <b><i>AK-HSDHs+TS1</i></b>  | <b><i>DHDPS2</i></b>               | <b>0.8003</b>  | <b>0.0054</b> |
| <b><i>AK-HSDHs+TS1</i></b>  | <b><i>DHDPSs</i></b>               | <b>0.7319</b>  | <b>0.0161</b> |
| <i>AK-HSDHs+TS1</i>         | <i>LKR-SDHI</i>                    | -0.3926        | 0.2618        |

|                          |                                    |                |                  |
|--------------------------|------------------------------------|----------------|------------------|
| <i>AK-HSDHs+TSI</i>      | <i>SAMS1</i>                       | 0.3351         | 0.3439           |
| <i>AK-HSDHs+TSI</i>      | <i>SAMS2</i>                       | <b>0.5872</b>  | <b>0.0743</b>    |
| <i>AK-HSDHs+TSI</i>      | <i>SAMS3</i>                       | <b>0.5818</b>  | <b>0.0777</b>    |
| <i>AK-HSDHs+TSI</i>      | <i>SAMS4</i>                       | <b>0.8127</b>  | <b>0.0043</b>    |
| <i>AK-HSDHs+TSI</i>      | <i>SAMSs</i>                       | <b>0.6976</b>  | <b>0.0249</b>    |
| <i>AK-HSDHs+TSI</i>      | <i>TD1</i>                         | <b>0.7033</b>  | <b>0.0233</b>    |
| <i>AK-HSDHs+TSI</i>      | <i>THA1</i>                        | <b>-0.4059</b> | <b>0.2445</b>    |
| <i>AK-HSDHs+TSI</i>      | <i>THA2</i>                        | 0.1415         | 0.6966           |
| <i>AK-HSDHs+TSI</i>      | <i>THAs</i>                        | 0.0879         | 0.8091           |
| <i>AK-HSDHs+TSI</i>      | <i>THAs+TD1</i>                    | <b>0.7045</b>  | <b>0.0229</b>    |
| <i>AK-HSDHs+TSI</i>      | <i>TS1</i>                         | <b>0.9617</b>  | <b>&lt;.0001</b> |
| <i>AK-HSDHs+TSI+TD1</i>  | <i>AK1</i>                         | -0.1598        | 0.6593           |
| <i>AK-HSDHs+TSI+TD1</i>  | <i>AK1+AK2</i>                     | -0.0702        | 0.8472           |
| <i>AK-HSDHs+TSI+TD1</i>  | <i>AK1+AK3</i>                     | -0.0068        | 0.9852           |
| <i>AK-HSDHs+TSI+TD1</i>  | <i>AK2</i>                         | -0.0347        | 0.9242           |
| <i>AK-HSDHs+TSI+TD1</i>  | <i>AK2+AK3</i>                     | -0.0033        | 0.9927           |
| <i>AK-HSDHs+TSI+TD1</i>  | <i>AK3</i>                         | 0.1722         | 0.6344           |
| <i>AK-HSDHs+TSI+TD1</i>  | <i>AK-HSDH1</i>                    | <b>0.6305</b>  | <b>0.0507</b>    |
| <i>AK-HSDHs+TSI+TD1</i>  | <i>AK-HSDH2</i>                    | <b>0.6458</b>  | <b>0.0437</b>    |
| <i>AK-HSDHs+TSI+TD1</i>  | <i>AK-HSDHs</i>                    | <b>0.7769</b>  | <b>0.0082</b>    |
| <i>AK-HSDHs+TSI+TD1</i>  | <i>AK-HSDHs+CGS1</i>               | <b>0.8177</b>  | <b>0.0039</b>    |
| <i>AK-HSDHs+TSI+TD1</i>  | <i>AK-HSDHs+TSI</i>                | <b>0.9976</b>  | <b>&lt;.0001</b> |
| <i>AK-HSDHs+TSI+TD1</i>  | <i>AK-HSDHs+TSI+THAs</i>           | <b>0.9974</b>  | <b>&lt;.0001</b> |
| <i>AK-HSDHs+TSI+TD1</i>  | <i>AKs</i>                         | -0.0381        | 0.9169           |
| <i>AK-HSDHs+TSI+TD1</i>  | <i>AKs+AK-HSDHs</i>                | 0.1651         | 0.6486           |
| <i>AK-HSDHs+TSI+TD1</i>  | <i>AKs+AK-HSDHs+CGS1</i>           | 0.3172         | 0.3718           |
| <i>AK-HSDHs+TSI+TD1</i>  | <i>AKs+AK-HSDHs+DHDPSs</i>         | 0.1936         | 0.5920           |
| <i>AK-HSDHs+TSI+TD1</i>  | <i>AKs+AK-HSDHs+TSI</i>            | <b>0.5837</b>  | <b>0.0765</b>    |
| <i>AK-HSDHs+TSI+TD1</i>  | <i>AKs+AK-HSDHs+TSI+TD1</i>        | <b>0.6131</b>  | <b>0.0595</b>    |
| <i>AK-HSDHs+TSI+TD1</i>  | <i>AKs+AK-HSDHs+TSI+THAs</i>       | <b>0.5801</b>  | <b>0.0788</b>    |
| <i>AK-HSDHs+TSI+TD1</i>  | <i>AKs+DHDPSs</i>                  | -0.0068        | 0.9851           |
| <i>AK-HSDHs+TSI+TD1</i>  | <i>BCAT1</i>                       | -0.2816        | 0.4306           |
| <i>AK-HSDHs+TSI+TD1</i>  | <b>Biosynthetic genes analyzed</b> | <b>0.6698</b>  | <b>0.0341</b>    |
| <i>AK-HSDHs+TSI+TD1</i>  | <b>Catabolic genes analyzed</b>    | <b>0.7163</b>  | <b>0.0198</b>    |
| <i>AK-HSDHs+TSI+TD1</i>  | <i>CGS1</i>                        | <b>0.7046</b>  | <b>0.0229</b>    |
| <i>AK-HSDHs+TSI+TD1</i>  | <i>DHDPS1</i>                      | 0.3482         | 0.3242           |
| <i>AK-HSDHs+TSI+TD1</i>  | <i>DHDPS2</i>                      | <b>0.8212</b>  | <b>0.0036</b>    |
| <i>AK-HSDHs+TSI+TD1</i>  | <i>DHDPSs</i>                      | <b>0.7698</b>  | <b>0.0092</b>    |
| <i>AK-HSDHs+TSI+TD1</i>  | <i>LKR-SDH1</i>                    | -0.3721        | 0.2897           |
| <i>AK-HSDHs+TSI+TD1</i>  | <i>SAMS1</i>                       | 0.3933         | 0.2608           |
| <i>AK-HSDHs+TSI+TD1</i>  | <i>SAMS2</i>                       | <b>0.6321</b>  | <b>0.0499</b>    |
| <i>AK-HSDHs+TSI+TD1</i>  | <i>SAMS3</i>                       | <b>0.5690</b>  | <b>0.0860</b>    |
| <i>AK-HSDHs+TSI+TD1</i>  | <i>SAMS4</i>                       | <b>0.8280</b>  | <b>0.0031</b>    |
| <i>AK-HSDHs+TSI+TD1</i>  | <i>SAMSs</i>                       | <b>0.7127</b>  | <b>0.0207</b>    |
| <i>AK-HSDHs+TSI+TD1</i>  | <i>TD1</i>                         | <b>0.7503</b>  | <b>0.0124</b>    |
| <i>AK-HSDHs+TSI+TD1</i>  | <i>THA1</i>                        | <b>-0.4081</b> | <b>0.2418</b>    |
| <i>AK-HSDHs+TSI+TD1</i>  | <i>THA2</i>                        | 0.1431         | 0.6933           |
| <i>AK-HSDHs+TSI+TD1</i>  | <i>THAs</i>                        | 0.0920         | 0.8005           |
| <i>AK-HSDHs+TSI+TD1</i>  | <i>THAs+TD1</i>                    | <b>0.7502</b>  | <b>0.0124</b>    |
| <i>AK-HSDHs+TSI+TD1</i>  | <i>TS1</i>                         | <b>0.9633</b>  | <b>&lt;.0001</b> |
| <i>AK-HSDHs+TSI+THAs</i> | <i>AK1</i>                         | -0.1606        | 0.6577           |
| <i>AK-HSDHs+TSI+THAs</i> | <i>AK1+AK2</i>                     | -0.0617        | 0.8656           |
| <i>AK-HSDHs+TSI+THAs</i> | <i>AK1+AK3</i>                     | -0.0274        | 0.9401           |
| <i>AK-HSDHs+TSI+THAs</i> | <i>AK2</i>                         | -0.0264        | 0.9424           |
| <i>AK-HSDHs+TSI+THAs</i> | <i>AK2+AK3</i>                     | 0.0004         | 0.9991           |
| <i>AK-HSDHs+TSI+THAs</i> | <i>AK3</i>                         | 0.1470         | 0.6853           |
| <i>AK-HSDHs+TSI+THAs</i> | <i>AK-HSDH1</i>                    | <b>0.6583</b>  | <b>0.0385</b>    |

|                          |                                    |                |                  |
|--------------------------|------------------------------------|----------------|------------------|
| <i>AK-HSDHs+TSI+THAs</i> | <i>AK-HSDH2</i>                    | <b>0.6227</b>  | <b>0.0545</b>    |
| <i>AK-HSDHs+TSI+THAs</i> | <i>AK-HSDHs</i>                    | <b>0.7777</b>  | <b>0.0081</b>    |
| <i>AK-HSDHs+TSI+THAs</i> | <i>AK-HSDHs+CGS1</i>               | <b>0.8192</b>  | <b>0.0037</b>    |
| <i>AK-HSDHs+TSI+THAs</i> | <i>AK-HSDHs+TSI</i>                | <b>0.9998</b>  | <b>&lt;.0001</b> |
| <i>AK-HSDHs+TSI+THAs</i> | <i>AKs</i>                         | -0.0343        | 0.9251           |
| <i>AK-HSDHs+TSI+THAs</i> | <i>AKs+AK-HSDHs</i>                | 0.1691         | 0.6405           |
| <i>AK-HSDHs+TSI+THAs</i> | <i>AKs+AK-HSDHs+CGS1</i>           | 0.3216         | 0.3649           |
| <i>AK-HSDHs+TSI+THAs</i> | <i>AKs+AK-HSDHs+DHDPSs</i>         | 0.1961         | 0.5872           |
| <i>AK-HSDHs+TSI+THAs</i> | <i>AKs+AK-HSDHs+TSI</i>            | <b>0.5881</b>  | <b>0.0737</b>    |
| <i>AK-HSDHs+TSI+THAs</i> | <i>AKs+AK-HSDHs+TSI+THAs</i>       | <b>0.5848</b>  | <b>0.0758</b>    |
| <i>AK-HSDHs+TSI+THAs</i> | <i>AKs+DHDPSs</i>                  | -0.0046        | 0.9899           |
| <i>AK-HSDHs+TSI+THAs</i> | <i>BCAT1</i>                       | -0.2246        | 0.5327           |
| <i>AK-HSDHs+TSI+THAs</i> | <b>Biosynthetic genes analyzed</b> | <b>0.6730</b>  | <b>0.0329</b>    |
| <i>AK-HSDHs+TSI+THAs</i> | <b>Catabolic genes analyzed</b>    | <b>0.6918</b>  | <b>0.0267</b>    |
| <i>AK-HSDHs+TSI+THAs</i> | <i>CGS1</i>                        | <b>0.7063</b>  | <b>0.0224</b>    |
| <i>AK-HSDHs+TSI+THAs</i> | <i>DHDPS1</i>                      | 0.3156         | 0.3744           |
| <i>AK-HSDHs+TSI+THAs</i> | <i>DHDPS2</i>                      | <b>0.7943</b>  | <b>0.0061</b>    |
| <i>AK-HSDHs+TSI+THAs</i> | <i>DHDPSs</i>                      | <b>0.7301</b>  | <b>0.0165</b>    |
| <i>AK-HSDHs+TSI+THAs</i> | <i>LKR-SDH1</i>                    | -0.3833        | 0.2743           |
| <i>AK-HSDHs+TSI+THAs</i> | <i>SAMS1</i>                       | 0.3322         | 0.3483           |
| <i>AK-HSDHs+TSI+THAs</i> | <i>SAMS2</i>                       | <b>0.5930</b>  | <b>0.0708</b>    |
| <i>AK-HSDHs+TSI+THAs</i> | <i>SAMS3</i>                       | <b>0.5714</b>  | <b>0.0844</b>    |
| <i>AK-HSDHs+TSI+THAs</i> | <i>SAMS4</i>                       | <b>0.8058</b>  | <b>0.0049</b>    |
| <i>AK-HSDHs+TSI+THAs</i> | <i>SAMSs</i>                       | <b>0.6881</b>  | <b>0.0278</b>    |
| <i>AK-HSDHs+TSI+THAs</i> | <i>TD1</i>                         | <b>0.7024</b>  | <b>0.0235</b>    |
| <i>AK-HSDHs+TSI+THAs</i> | <i>THA1</i>                        | <b>-0.4048</b> | <b>0.2458</b>    |
| <i>AK-HSDHs+TSI+THAs</i> | <i>THA2</i>                        | 0.1616         | 0.6556           |
| <i>AK-HSDHs+TSI+THAs</i> | <i>THAs</i>                        | 0.1084         | 0.7656           |
| <i>AK-HSDHs+TSI+THAs</i> | <i>THAs+TD1</i>                    | <b>0.7077</b>  | <b>0.0220</b>    |
| <i>AK-HSDHs+TSI+THAs</i> | <i>TSI</i>                         | <b>0.9660</b>  | <b>&lt;.0001</b> |
| <i>AKs</i>               | <i>AK1</i>                         | -0.1242        | 0.7325           |
| <i>AKs</i>               | <i>AK2</i>                         | <b>0.9738</b>  | <b>&lt;.0001</b> |
| <i>AKs</i>               | <i>AK3</i>                         | 0.1832         | 0.6124           |
| <i>AKs</i>               | <i>AK-HSDH1</i>                    | <b>-0.4840</b> | <b>0.1563</b>    |
| <i>AKs</i>               | <i>AK-HSDH2</i>                    | 0.0039         | 0.9915           |
| <i>AKs</i>               | <i>AKs+AK-HSDHs</i>                | <b>0.9672</b>  | <b>&lt;.0001</b> |
| <i>AKs</i>               | <i>BCAT1</i>                       | -0.1010        | 0.7812           |
| <i>AKs</i>               | <i>CGS1</i>                        | -0.0381        | 0.9167           |
| <i>AKs</i>               | <i>DHDPS1</i>                      | 0.1132         | 0.7554           |
| <i>AKs</i>               | <i>DHDPS2</i>                      | -0.0068        | 0.9852           |
| <i>AKs</i>               | <i>LKR-SDH1</i>                    | 0.3043         | 0.3926           |
| <i>AKs</i>               | <i>SAMS1</i>                       | -0.2489        | 0.4880           |
| <i>AKs</i>               | <i>SAMS2</i>                       | 0.1387         | 0.7023           |
| <i>AKs</i>               | <i>SAMS3</i>                       | -0.2625        | 0.4637           |
| <i>AKs</i>               | <i>SAMS4</i>                       | -0.2591        | 0.4697           |
| <i>AKs</i>               | <i>TD1</i>                         | 0.0100         | 0.9781           |
| <i>AKs</i>               | <i>THA1</i>                        | -0.0465        | 0.8986           |
| <i>AKs</i>               | <i>THA2</i>                        | <b>0.4576</b>  | <b>0.1836</b>    |
| <i>AKs</i>               | <i>TSI</i>                         | 0.0634         | 0.8618           |
| <i>AKs/AK-HSDHs</i>      | <i>(AKs+AK-HSDHs)/AK-HSDHs</i>     | <b>1.0000</b>  | <b>&lt;.0001</b> |
| <i>AKs/AK-HSDHs</i>      | <i>AK1</i>                         | -0.2304        | 0.5219           |
| <i>AKs/AK-HSDHs</i>      | <i>AK1+AK2</i>                     | <b>0.7242</b>  | <b>0.0179</b>    |
| <i>AKs/AK-HSDHs</i>      | <i>AK1+AK3</i>                     | -0.0715        | 0.8443           |
| <i>AKs/AK-HSDHs</i>      | <i>AK2</i>                         | <b>0.7459</b>  | <b>0.0132</b>    |
| <i>AKs/AK-HSDHs</i>      | <i>AK2+AK3</i>                     | <b>0.7548</b>  | <b>0.0116</b>    |
| <i>AKs/AK-HSDHs</i>      | <i>AK3</i>                         | 0.1720         | 0.6347           |
| <i>AKs/AK-HSDHs</i>      | <i>AK-HSDH1</i>                    | <b>-0.8182</b> | <b>0.0038</b>    |

|                          |                                 |                |               |
|--------------------------|---------------------------------|----------------|---------------|
| <i>AKs/AK-HSDHs</i>      | <i>AK-HSDH2</i>                 | <b>-0.5349</b> | <b>0.1111</b> |
| <i>AKs/AK-HSDHs</i>      | <i>AK-HSDHs</i>                 | <b>-0.8097</b> | <b>0.0045</b> |
| <i>AKs/AK-HSDHs</i>      | <i>AK-HSDHs+CGS1</i>            | <b>-0.6860</b> | <b>0.0285</b> |
| <i>AKs/AK-HSDHs</i>      | <i>AK-HSDHs+TS1</i>             | <b>-0.5580</b> | <b>0.0937</b> |
| <i>AKs/AK-HSDHs</i>      | <i>AK-HSDHs+TS1+TD1</i>         | <b>-0.5412</b> | <b>0.1062</b> |
| <i>AKs/AK-HSDHs</i>      | <i>AK-HSDHs+TS1+THAs</i>        | <b>-0.5455</b> | <b>0.1029</b> |
| <i>AKs/AK-HSDHs</i>      | <i>AKs</i>                      | <b>0.7432</b>  | <b>0.0138</b> |
| <i>AKs/AK-HSDHs</i>      | <i>AKs+AK-HSDHs</i>             | <b>0.5584</b>  | <b>0.0934</b> |
| <i>AKs/AK-HSDHs</i>      | <i>AKs+AK-HSDHs+CGS1</i>        | <b>0.4326</b>  | <b>0.2118</b> |
| <i>AKs/AK-HSDHs</i>      | <i>AKs+AK-HSDHs+DHDPSs</i>      | <b>0.5420</b>  | <b>0.1055</b> |
| <i>AKs/AK-HSDHs</i>      | <i>AKs+AK-HSDHs+TS1</i>         | 0.2621         | 0.4645        |
| <i>AKs/AK-HSDHs</i>      | <i>AKs+AK-HSDHs+TS1+TD1</i>     | 0.2391         | 0.5058        |
| <i>AKs/AK-HSDHs</i>      | <i>AKs+AK-HSDHs+TS1+THAs</i>    | 0.2690         | 0.4524        |
| <i>AKs/AK-HSDHs</i>      | <i>AKs+DHDPSs</i>               | <b>0.7283</b>  | <b>0.0169</b> |
| <i>AKs/AK-HSDHs</i>      | <i>BCAT1</i>                    | -0.0689        | 0.8501        |
| <i>AKs/AK-HSDHs</i>      | Biosynthetic genes analyzed     | 0.1569         | 0.6651        |
| <i>AKs/AK-HSDHs</i>      | <b>Catabolic genes analyzed</b> | <b>-0.7172</b> | <b>0.0196</b> |
| <i>AKs/AK-HSDHs</i>      | <i>CGS1</i>                     | <b>-0.4155</b> | <b>0.2324</b> |
| <i>AKs/AK-HSDHs</i>      | <i>DHDPS1</i>                   | 0.1196         | 0.7420        |
| <i>AKs/AK-HSDHs</i>      | <i>DHDPS2</i>                   | <b>-0.5194</b> | <b>0.1239</b> |
| <i>AKs/AK-HSDHs</i>      | <i>DHDPSs</i>                   | -0.2850        | 0.4248        |
| <i>AKs/AK-HSDHs</i>      | <i>LKR-SDH1</i>                 | <b>0.6965</b>  | <b>0.0252</b> |
| <i>AKs/AK-HSDHs</i>      | <i>SAMS1</i>                    | -0.2118        | 0.5569        |
| <i>AKs/AK-HSDHs</i>      | <i>SAMS2</i>                    | 0.0328         | 0.9283        |
| <i>AKs/AK-HSDHs</i>      | <i>SAMS3</i>                    | <b>-0.7288</b> | <b>0.0168</b> |
| <i>AKs/AK-HSDHs</i>      | <i>SAMS4</i>                    | <b>-0.6735</b> | <b>0.0328</b> |
| <i>AKs/AK-HSDHs</i>      | <i>SAMSs</i>                    | <b>-0.7192</b> | <b>0.0191</b> |
| <i>AKs/AK-HSDHs</i>      | <i>TD1</i>                      | -0.2550        | 0.4771        |
| <i>AKs/AK-HSDHs</i>      | <i>THA1</i>                     | 0.3046         | 0.3921        |
| <i>AKs/AK-HSDHs</i>      | <i>THA2</i>                     | <b>0.5020</b>  | <b>0.1393</b> |
| <i>AKs/AK-HSDHs</i>      | <i>THAs</i>                     | <b>0.6049</b>  | <b>0.0639</b> |
| <i>AKs/AK-HSDHs</i>      | <i>THAs+TD1</i>                 | -0.1394        | 0.7010        |
| <i>AKs/AK-HSDHs</i>      | <i>TS1</i>                      | -0.3727        | 0.2888        |
| <i>AKs+AK-HSDHs</i>      | <i>AK1</i>                      | -0.0976        | 0.7886        |
| <i>AKs+AK-HSDHs</i>      | <i>AK2</i>                      | <b>0.9284</b>  | <b>0.0001</b> |
| <i>AKs+AK-HSDHs</i>      | <i>AK3</i>                      | 0.2277         | 0.5268        |
| <i>AKs+AK-HSDHs</i>      | <i>AK-HSDH1</i>                 | -0.2938        | 0.4101        |
| <i>AKs+AK-HSDHs</i>      | <i>AK-HSDH2</i>                 | 0.2284         | 0.5257        |
| <i>AKs+AK-HSDHs</i>      | <i>BCAT1</i>                    | -0.1306        | 0.7190        |
| <i>AKs+AK-HSDHs</i>      | <i>CGS1</i>                     | 0.1294         | 0.7217        |
| <i>AKs+AK-HSDHs</i>      | <i>DHDPS1</i>                   | 0.0976         | 0.7885        |
| <i>AKs+AK-HSDHs</i>      | <i>DHDPS2</i>                   | 0.1918         | 0.5956        |
| <i>AKs+AK-HSDHs</i>      | <i>LKR-SDH1</i>                 | 0.1141         | 0.7536        |
| <i>AKs+AK-HSDHs</i>      | <i>SAMS1</i>                    | -0.1910        | 0.5972        |
| <i>AKs+AK-HSDHs</i>      | <i>SAMS2</i>                    | 0.1878         | 0.6034        |
| <i>AKs+AK-HSDHs</i>      | <i>SAMS3</i>                    | -0.0507        | 0.8893        |
| <i>AKs+AK-HSDHs</i>      | <i>SAMS4</i>                    | -0.0435        | 0.9050        |
| <i>AKs+AK-HSDHs</i>      | <i>TD1</i>                      | 0.1387         | 0.7024        |
| <i>AKs+AK-HSDHs</i>      | <i>THA1</i>                     | -0.1951        | 0.5891        |
| <i>AKs+AK-HSDHs</i>      | <i>THA2</i>                     | 0.3991         | 0.2532        |
| <i>AKs+AK-HSDHs</i>      | <i>TS1</i>                      | 0.2207         | 0.5401        |
| <i>AKs+AK-HSDHs</i>      | <i>AK1</i>                      | -0.1814        | 0.6159        |
| <i>AKs+AK-HSDHs+CGS1</i> | <i>AK1+AK2</i>                  | <b>0.8819</b>  | <b>0.0007</b> |
| <i>AKs+AK-HSDHs+CGS1</i> | <i>AK1+AK3</i>                  | 0.0072         | 0.9842        |
| <i>AKs+AK-HSDHs+CGS1</i> | <i>AK2</i>                      | <b>0.8883</b>  | <b>0.0006</b> |
| <i>AKs+AK-HSDHs+CGS1</i> | <i>AK2+AK3</i>                  | <b>0.9012</b>  | <b>0.0004</b> |
| <i>AKs+AK-HSDHs+CGS1</i> | <i>AK3</i>                      | 0.2098         | 0.5608        |

|                                   |                                    |               |                  |
|-----------------------------------|------------------------------------|---------------|------------------|
| <i>AKs+AK-HSDHs+CGS1</i>          | <i>AK-HSDH1</i>                    | -0.1847       | 0.6095           |
| <i>AKs+AK-HSDHs+CGS1</i>          | <i>AK-HSDH2</i>                    | 0.3585        | 0.3090           |
| <i>AKs+AK-HSDHs+CGS1</i>          | <i>AK-HSDHs</i>                    | 0.1306        | 0.7191           |
| <b><i>AKs+AK-HSDHs+CGS1</i></b>   | <b><i>AKs</i></b>                  | <b>0.9049</b> | <b>0.0003</b>    |
| <b><i>AKs+AK-HSDHs+CGS1</i></b>   | <b><i>AKs+AK-HSDHs</i></b>         | <b>0.9740</b> | <b>&lt;.0001</b> |
| <b><i>AKs+AK-HSDHs+CGS1</i></b>   | <b><i>AKs+AK-HSDHs+DHDPSs</i></b>  | <b>0.9766</b> | <b>&lt;.0001</b> |
| <b><i>AKs+AK-HSDHs+CGS1</i></b>   | <b><i>AKs+DHDPSs</i></b>           | <b>0.9133</b> | <b>0.0002</b>    |
| <i>AKs+AK-HSDHs+CGS1</i>          | <i>BCAT1</i>                       | -0.1876       | 0.6038           |
| <b><i>AKs+AK-HSDHs+CGS1</i></b>   | <b>Biosynthetic genes analyzed</b> | <b>0.9085</b> | <b>0.0003</b>    |
| <i>AKs+AK-HSDHs+CGS1</i>          | Catabolic genes analyzed           | 0.0498        | 0.8913           |
| <i>AKs+AK-HSDHs+CGS1</i>          | <i>CGS1</i>                        | 0.3506        | 0.3206           |
| <i>AKs+AK-HSDHs+CGS1</i>          | <i>DHDPS1</i>                      | 0.0652        | 0.8580           |
| <i>AKs+AK-HSDHs+CGS1</i>          | <i>DHDPS2</i>                      | 0.3445        | 0.3297           |
| <i>AKs+AK-HSDHs+CGS1</i>          | <i>DHDPSs</i>                      | 0.2776        | 0.4374           |
| <i>AKs+AK-HSDHs+CGS1</i>          | <i>LKR-SDH1</i>                    | -0.0443       | 0.9032           |
| <i>AKs+AK-HSDHs+CGS1</i>          | <i>SAMS1</i>                       | -0.0942       | 0.7958           |
| <i>AKs+AK-HSDHs+CGS1</i>          | <i>SAMS2</i>                       | 0.2415        | 0.5015           |
| <i>AKs+AK-HSDHs+CGS1</i>          | <i>SAMS3</i>                       | 0.0709        | 0.8458           |
| <i>AKs+AK-HSDHs+CGS1</i>          | <i>SAMS4</i>                       | 0.1259        | 0.7289           |
| <i>AKs+AK-HSDHs+CGS1</i>          | <i>SAMSs</i>                       | 0.0472        | 0.8971           |
| <i>AKs+AK-HSDHs+CGS1</i>          | <i>TD1</i>                         | 0.2546        | 0.4778           |
| <i>AKs+AK-HSDHs+CGS1</i>          | <i>THA1</i>                        | -0.3490       | 0.3229           |
| <b><i>AKs+AK-HSDHs+CGS1</i></b>   | <b><i>THA2</i></b>                 | <b>0.4704</b> | <b>0.1700</b>    |
| <b><i>AKs+AK-HSDHs+CGS1</i></b>   | <b><i>THAs</i></b>                 | <b>0.4998</b> | <b>0.1413</b>    |
| <i>AKs+AK-HSDHs+CGS1</i>          | <i>THAs+TD1</i>                    | 0.3327        | 0.3475           |
| <i>AKs+AK-HSDHs+CGS1</i>          | <i>TS1</i>                         | 0.3545        | 0.3148           |
| <i>AKs+AK-HSDHs+DHDPSs</i>        | <i>AK1</i>                         | -0.0940       | 0.7963           |
| <b><i>AKs+AK-HSDHs+DHDPSs</i></b> | <b><i>AK1+AK2</i></b>              | <b>0.9355</b> | <b>&lt;.0001</b> |
| <i>AKs+AK-HSDHs+DHDPSs</i>        | <i>AK1+AK3</i>                     | 0.1049        | 0.7730           |
| <b><i>AKs+AK-HSDHs+DHDPSs</i></b> | <b><i>AK2</i></b>                  | <b>0.9216</b> | <b>0.0002</b>    |
| <b><i>AKs+AK-HSDHs+DHDPSs</i></b> | <b><i>AK2+AK3</i></b>              | <b>0.9377</b> | <b>&lt;.0001</b> |
| <i>AKs+AK-HSDHs+DHDPSs</i>        | <i>AK3</i>                         | 0.2308        | 0.5212           |
| <i>AKs+AK-HSDHs+DHDPSs</i>        | <i>AK-HSDH1</i>                    | -0.2844       | 0.4258           |
| <i>AKs+AK-HSDHs+DHDPSs</i>        | <i>AK-HSDH2</i>                    | 0.2496        | 0.4868           |
| <i>AKs+AK-HSDHs+DHDPSs</i>        | <i>AK-HSDHs</i>                    | 0.0031        | 0.9932           |
| <b><i>AKs+AK-HSDHs+DHDPSs</i></b> | <b><i>AKs</i></b>                  | <b>0.9616</b> | <b>&lt;.0001</b> |
| <b><i>AKs+AK-HSDHs+DHDPSs</i></b> | <b><i>AKs+AK-HSDHs</i></b>         | <b>0.9993</b> | <b>&lt;.0001</b> |
| <i>AKs+AK-HSDHs+DHDPSs</i>        | <i>BCAT1</i>                       | -0.1565       | 0.6659           |
| <b><i>AKs+AK-HSDHs+DHDPSs</i></b> | <b>Biosynthetic genes analyzed</b> | <b>0.8442</b> | <b>0.0021</b>    |
| <i>AKs+AK-HSDHs+DHDPSs</i>        | Catabolic genes analyzed           | -0.0786       | 0.8292           |
| <i>AKs+AK-HSDHs+DHDPSs</i>        | <i>CGS1</i>                        | 0.1437        | 0.6920           |
| <i>AKs+AK-HSDHs+DHDPSs</i>        | <i>DHDPS1</i>                      | 0.1246        | 0.7315           |
| <i>AKs+AK-HSDHs+DHDPSs</i>        | <i>DHDPS2</i>                      | 0.2217        | 0.5382           |
| <i>AKs+AK-HSDHs+DHDPSs</i>        | <i>DHDPSs</i>                      | 0.2334        | 0.5164           |
| <i>AKs+AK-HSDHs+DHDPSs</i>        | <i>LKR-SDH1</i>                    | 0.1113        | 0.7595           |
| <i>AKs+AK-HSDHs+DHDPSs</i>        | <i>SAMS1</i>                       | -0.1636       | 0.6516           |
| <i>AKs+AK-HSDHs+DHDPSs</i>        | <i>SAMS2</i>                       | 0.2187        | 0.5438           |
| <i>AKs+AK-HSDHs+DHDPSs</i>        | <i>SAMS3</i>                       | -0.0369       | 0.9195           |
| <i>AKs+AK-HSDHs+DHDPSs</i>        | <i>SAMS4</i>                       | -0.0175       | 0.9618           |
| <i>AKs+AK-HSDHs+DHDPSs</i>        | <i>SAMSs</i>                       | -0.0812       | 0.8236           |
| <i>AKs+AK-HSDHs+DHDPSs</i>        | <i>TD1</i>                         | 0.1730        | 0.6327           |
| <i>AKs+AK-HSDHs+DHDPSs</i>        | <i>THA1</i>                        | -0.2022       | 0.5754           |
| <i>AKs+AK-HSDHs+DHDPSs</i>        | <i>THA2</i>                        | 0.3946        | 0.2592           |
| <b><i>AKs+AK-HSDHs+DHDPSs</i></b> | <b><i>THAs</i></b>                 | <b>0.4523</b> | <b>0.1893</b>    |
| <i>AKs+AK-HSDHs+DHDPSs</i>        | <i>THAs+TD1</i>                    | 0.2432        | 0.4983           |
| <i>AKs+AK-HSDHs+DHDPSs</i>        | <i>TS1</i>                         | 0.2477        | 0.4901           |
| <i>AKs+AK-HSDHs+TS1</i>           | <i>AK1</i>                         | -0.1941       | 0.5911           |

|                             |                                    |               |                  |
|-----------------------------|------------------------------------|---------------|------------------|
| <i>AKs+AK-HSDHs+TSI</i>     | <i>AK1+AK2</i>                     | <b>0.7574</b> | <b>0.0112</b>    |
| <i>AKs+AK-HSDHs+TSI</i>     | <i>AK1+AK3</i>                     | 0.0206        | 0.9549           |
| <i>AKs+AK-HSDHs+TSI</i>     | <i>AK2</i>                         | <b>0.7704</b> | <b>0.0091</b>    |
| <i>AKs+AK-HSDHs+TSI</i>     | <i>AK2+AK3</i>                     | <b>0.7921</b> | <b>0.0063</b>    |
| <i>AKs+AK-HSDHs+TSI</i>     | <i>AK3</i>                         | 0.2403        | 0.5037           |
| <i>AKs+AK-HSDHs+TSI</i>     | <i>AK-HSDH1</i>                    | 0.0153        | 0.9666           |
| <i>AKs+AK-HSDHs+TSI</i>     | <i>AK-HSDH2</i>                    | 0.3920        | 0.2626           |
| <i>AKs+AK-HSDHs+TSI</i>     | <i>AK-HSDHs</i>                    | 0.2652        | 0.4590           |
| <i>AKs+AK-HSDHs+TSI</i>     | <i>AK-HSDHs+CGS1</i>               | 0.3606        | 0.3061           |
| <i>AKs+AK-HSDHs+TSI</i>     | <i>AKs</i>                         | <b>0.7881</b> | <b>0.0068</b>    |
| <i>AKs+AK-HSDHs+TSI</i>     | <i>AKs+AK-HSDHs</i>                | <b>0.8879</b> | <b>0.0006</b>    |
| <i>AKs+AK-HSDHs+TSI</i>     | <i>AKs+AK-HSDHs+CGS1</i>           | <b>0.9307</b> | <b>&lt;.0001</b> |
| <i>AKs+AK-HSDHs+TSI</i>     | <i>AKs+AK-HSDHs+DHDPSs</i>         | <b>0.9001</b> | <b>0.0004</b>    |
| <i>AKs+AK-HSDHs+TSI</i>     | <i>AKs+DHDPSs</i>                  | <b>0.8058</b> | <b>0.0049</b>    |
| <i>AKs+AK-HSDHs+TSI</i>     | <i>BCAT1</i>                       | -0.2202       | 0.5410           |
| <i>AKs+AK-HSDHs+TSI</i>     | <b>Biosynthetic genes analyzed</b> | <b>0.9864</b> | <b>&lt;.0001</b> |
| <i>AKs+AK-HSDHs+TSI</i>     | Catabolic genes analyzed           | 0.1732        | 0.6322           |
| <i>AKs+AK-HSDHs+TSI</i>     | <i>CGS1</i>                        | <b>0.4012</b> | <b>0.2505</b>    |
| <i>AKs+AK-HSDHs+TSI</i>     | <i>DHDPS1</i>                      | 0.2851        | 0.4246           |
| <i>AKs+AK-HSDHs+TSI</i>     | <i>DHDPS2</i>                      | <b>0.4868</b> | <b>0.1536</b>    |
| <i>AKs+AK-HSDHs+TSI</i>     | <i>DHDPSs</i>                      | <b>0.5062</b> | <b>0.1355</b>    |
| <i>AKs+AK-HSDHs+TSI</i>     | <i>LKR-SDH1</i>                    | 0.0074        | 0.9837           |
| <i>AKs+AK-HSDHs+TSI</i>     | <i>SAMS1</i>                       | 0.0034        | 0.9925           |
| <i>AKs+AK-HSDHs+TSI</i>     | <i>SAMS2</i>                       | <b>0.4755</b> | <b>0.1648</b>    |
| <i>AKs+AK-HSDHs+TSI</i>     | <i>SAMS3</i>                       | 0.1435        | 0.6925           |
| <i>AKs+AK-HSDHs+TSI</i>     | <i>SAMS4</i>                       | 0.2887        | 0.4184           |
| <i>AKs+AK-HSDHs+TSI</i>     | <i>SAMSs</i>                       | 0.1689        | 0.6409           |
| <i>AKs+AK-HSDHs+TSI</i>     | <i>TD1</i>                         | <b>0.4414</b> | <b>0.2016</b>    |
| <i>AKs+AK-HSDHs+TSI</i>     | <i>THA1</i>                        | -0.2865       | 0.4222           |
| <i>AKs+AK-HSDHs+TSI</i>     | <i>THA2</i>                        | <b>0.4607</b> | <b>0.1803</b>    |
| <i>AKs+AK-HSDHs+TSI</i>     | <i>THAs</i>                        | <b>0.4942</b> | <b>0.1466</b>    |
| <i>AKs+AK-HSDHs+TSI</i>     | <i>THAs+TD1</i>                    | <b>0.5170</b> | <b>0.1260</b>    |
| <i>AKs+AK-HSDHs+TSI</i>     | <i>TS1</i>                         | <b>0.6446</b> | <b>0.0442</b>    |
| <i>AKs+AK-HSDHs+TSI+TD1</i> | <i>AK1</i>                         | -0.2012       | 0.5773           |
| <i>AKs+AK-HSDHs+TSI+TD1</i> | <i>AK1+AK2</i>                     | <b>0.7323</b> | <b>0.0160</b>    |
| <i>AKs+AK-HSDHs+TSI+TD1</i> | <i>AK1+AK3</i>                     | 0.0262        | 0.9427           |
| <i>AKs+AK-HSDHs+TSI+TD1</i> | <i>AK2</i>                         | <b>0.7477</b> | <b>0.0129</b>    |
| <i>AKs+AK-HSDHs+TSI+TD1</i> | <i>AK2+AK3</i>                     | <b>0.7726</b> | <b>0.0088</b>    |
| <i>AKs+AK-HSDHs+TSI+TD1</i> | <i>AK3</i>                         | 0.2557        | 0.4759           |
| <i>AKs+AK-HSDHs+TSI+TD1</i> | <i>AK-HSDH1</i>                    | 0.0231        | 0.9496           |
| <i>AKs+AK-HSDHs+TSI+TD1</i> | <i>AK-HSDH2</i>                    | <b>0.4191</b> | <b>0.2279</b>    |
| <i>AKs+AK-HSDHs+TSI+TD1</i> | <i>AK-HSDHs</i>                    | 0.2873        | 0.4210           |
| <i>AKs+AK-HSDHs+TSI+TD1</i> | <i>AK-HSDHs+CGS1</i>               | 0.3846        | 0.2724           |
| <i>AKs+AK-HSDHs+TSI+TD1</i> | <i>AK-HSDHs+TSI</i>                | <b>0.6075</b> | <b>0.0625</b>    |
| <i>AKs+AK-HSDHs+TSI+TD1</i> | <i>AK-HSDHs+TSI+THAs</i>           | <b>0.6143</b> | <b>0.0588</b>    |
| <i>AKs+AK-HSDHs+TSI+TD1</i> | <i>AKs</i>                         | <b>0.7661</b> | <b>0.0098</b>    |
| <i>AKs+AK-HSDHs+TSI+TD1</i> | <i>AKs+AK-HSDHs</i>                | <b>0.8710</b> | <b>0.0010</b>    |
| <i>AKs+AK-HSDHs+TSI+TD1</i> | <i>AKs+AK-HSDHs+CGS1</i>           | <b>0.9196</b> | <b>0.0002</b>    |
| <i>AKs+AK-HSDHs+TSI+TD1</i> | <i>AKs+AK-HSDHs+DHDPSs</i>         | <b>0.8850</b> | <b>0.0007</b>    |
| <i>AKs+AK-HSDHs+TSI+TD1</i> | <i>AKs+AK-HSDHs+TSI</i>            | <b>0.9984</b> | <b>&lt;.0001</b> |
| <i>AKs+AK-HSDHs+TSI+TD1</i> | <i>AKs+AK-HSDHs+TSI+THAs</i>       | <b>0.9982</b> | <b>&lt;.0001</b> |
| <i>AKs+AK-HSDHs+TSI+TD1</i> | <i>AKs+DHDPSs</i>                  | <b>0.7856</b> | <b>0.0071</b>    |
| <i>AKs+AK-HSDHs+TSI+TD1</i> | <i>BCAT1</i>                       | -0.2615       | 0.4655           |
| <i>AKs+AK-HSDHs+TSI+TD1</i> | <b>Biosynthetic genes analyzed</b> | <b>0.9898</b> | <b>&lt;.0001</b> |
| <i>AKs+AK-HSDHs+TSI+TD1</i> | Catabolic genes analyzed           | 0.2111        | 0.5582           |
| <i>AKs+AK-HSDHs+TSI+TD1</i> | <i>CGS1</i>                        | <b>0.4228</b> | <b>0.2235</b>    |
| <i>AKs+AK-HSDHs+TSI+TD1</i> | <i>DHDPS1</i>                      | 0.3136        | 0.3776           |

|                              |                                    |                |                  |
|------------------------------|------------------------------------|----------------|------------------|
| <i>AKs+AK-HSDHs+TSI+TD1</i>  | <i>DHDPS2</i>                      | <b>0.5233</b>  | <b>0.1206</b>    |
| <i>AKs+AK-HSDHs+TSI+TD1</i>  | <i>DHDPSs</i>                      | <b>0.5489</b>  | <b>0.1003</b>    |
| <i>AKs+AK-HSDHs+TSI+TD1</i>  | <i>LKR-SDH1</i>                    | 0.0011         | 0.9976           |
| <i>AKs+AK-HSDHs+TSI+TD1</i>  | <i>SAMS1</i>                       | 0.0569         | 0.8760           |
| <i>AKs+AK-HSDHs+TSI+TD1</i>  | <i>SAMS2</i>                       | <b>0.5163</b>  | <b>0.1266</b>    |
| <i>AKs+AK-HSDHs+TSI+TD1</i>  | <i>SAMS3</i>                       | 0.1588         | 0.6612           |
| <i>AKs+AK-HSDHs+TSI+TD1</i>  | <i>SAMS4</i>                       | 0.3282         | 0.3546           |
| <i>AKs+AK-HSDHs+TSI+TD1</i>  | <i>SAMSs</i>                       | 0.2067         | 0.5666           |
| <i>AKs+AK-HSDHs+TSI+TD1</i>  | <i>TD1</i>                         | <b>0.4911</b>  | <b>0.1495</b>    |
| <i>AKs+AK-HSDHs+TSI+TD1</i>  | <i>THA1</i>                        | -0.2985        | 0.4021           |
| <i>AKs+AK-HSDHs+TSI+TD1</i>  | <i>THA2</i>                        | <b>0.4526</b>  | <b>0.1890</b>    |
| <i>AKs+AK-HSDHs+TSI+TD1</i>  | <i>THAs</i>                        | <b>0.4841</b>  | <b>0.1562</b>    |
| <i>AKs+AK-HSDHs+TSI+TD1</i>  | <i>THAs+TD1</i>                    | <b>0.5632</b>  | <b>0.0900</b>    |
| <i>AKs+AK-HSDHs+TSI+TD1</i>  | <i>TSI</i>                         | <b>0.6694</b>  | <b>0.0343</b>    |
| <i>AKs+AK-HSDHs+TSI+THAs</i> | <i>AK1</i>                         | -0.1994        | 0.5808           |
| <i>AKs+AK-HSDHs+TSI+THAs</i> | <i>AK1+AK2</i>                     | <b>0.7605</b>  | <b>0.0107</b>    |
| <i>AKs+AK-HSDHs+TSI+THAs</i> | <i>AK1+AK3</i>                     | 0.0140         | 0.9694           |
| <i>AKs+AK-HSDHs+TSI+THAs</i> | <i>AK2</i>                         | <b>0.7745</b>  | <b>0.0085</b>    |
| <i>AKs+AK-HSDHs+TSI+THAs</i> | <i>AK2+AK3</i>                     | <b>0.7956</b>  | <b>0.0059</b>    |
| <i>AKs+AK-HSDHs+TSI+THAs</i> | <i>AK3</i>                         | 0.2380         | 0.5079           |
| <i>AKs+AK-HSDHs+TSI+THAs</i> | <i>AK-HSDH1</i>                    | 0.0110         | 0.9760           |
| <i>AKs+AK-HSDHs+TSI+THAs</i> | <i>AK-HSDH2</i>                    | 0.3843         | 0.2729           |
| <i>AKs+AK-HSDHs+TSI+THAs</i> | <i>AK-HSDHs</i>                    | 0.2578         | 0.4721           |
| <i>AKs+AK-HSDHs+TSI+THAs</i> | <i>AK-HSDHs+CGS1</i>               | 0.3569         | 0.3113           |
| <i>AKs+AK-HSDHs+TSI+THAs</i> | <i>AK-HSDHs+TSI</i>                | <b>0.5774</b>  | <b>0.0805</b>    |
| <i>AKs+AK-HSDHs+TSI+THAs</i> | <i>AKs</i>                         | <b>0.7907</b>  | <b>0.0065</b>    |
| <i>AKs+AK-HSDHs+TSI+THAs</i> | <i>AKs+AK-HSDHs</i>                | <b>0.8887</b>  | <b>0.0006</b>    |
| <i>AKs+AK-HSDHs+TSI+THAs</i> | <i>AKs+AK-HSDHs+CGS1</i>           | <b>0.9317</b>  | <b>&lt;.0001</b> |
| <i>AKs+AK-HSDHs+TSI+THAs</i> | <i>AKs+AK-HSDHs+DHDPSs</i>         | <b>0.9007</b>  | <b>0.0004</b>    |
| <i>AKs+AK-HSDHs+TSI+THAs</i> | <i>AKs+AK-HSDHs+TSI</i>            | <b>0.9999</b>  | <b>&lt;.0001</b> |
| <i>AKs+AK-HSDHs+TSI+THAs</i> | <i>AKs+DHDPSs</i>                  | <b>0.8082</b>  | <b>0.0047</b>    |
| <i>AKs+AK-HSDHs+TSI+THAs</i> | <i>BCAT1</i>                       | -0.2188        | 0.5437           |
| <i>AKs+AK-HSDHs+TSI+THAs</i> | <b>Biosynthetic genes analyzed</b> | <b>0.9863</b>  | <b>&lt;.0001</b> |
| <i>AKs+AK-HSDHs+TSI+THAs</i> | Catabolic genes analyzed           | 0.1675         | 0.6436           |
| <i>AKs+AK-HSDHs+TSI+THAs</i> | <i>CGS1</i>                        | <b>0.4023</b>  | <b>0.2491</b>    |
| <i>AKs+AK-HSDHs+TSI+THAs</i> | <i>DHDPS1</i>                      | 0.2846         | 0.4255           |
| <i>AKs+AK-HSDHs+TSI+THAs</i> | <i>DHDPS2</i>                      | <b>0.4811</b>  | <b>0.1593</b>    |
| <i>AKs+AK-HSDHs+TSI+THAs</i> | <i>DHDPSs</i>                      | <b>0.5016</b>  | <b>0.1396</b>    |
| <i>AKs+AK-HSDHs+TSI+THAs</i> | <i>LKR-SDH1</i>                    | 0.0115         | 0.9749           |
| <i>AKs+AK-HSDHs+TSI+THAs</i> | <i>SAMS1</i>                       | 0.0010         | 0.9977           |
| <i>AKs+AK-HSDHs+TSI+THAs</i> | <i>SAMS2</i>                       | <b>0.4753</b>  | <b>0.1650</b>    |
| <i>AKs+AK-HSDHs+TSI+THAs</i> | <i>SAMS3</i>                       | 0.1380         | 0.7039           |
| <i>AKs+AK-HSDHs+TSI+THAs</i> | <i>SAMS4</i>                       | 0.2838         | 0.4269           |
| <i>AKs+AK-HSDHs+TSI+THAs</i> | <i>SAMSs</i>                       | 0.1632         | 0.6524           |
| <i>AKs+AK-HSDHs+TSI+THAs</i> | <i>TD1</i>                         | <b>0.4382</b>  | <b>0.2052</b>    |
| <i>AKs+AK-HSDHs+TSI+THAs</i> | <i>THA1</i>                        | -0.2866        | 0.4220           |
| <i>AKs+AK-HSDHs+TSI+THAs</i> | <i>THA2</i>                        | <b>0.4709</b>  | <b>0.1695</b>    |
| <i>AKs+AK-HSDHs+TSI+THAs</i> | <i>THAs</i>                        | <b>0.5043</b>  | <b>0.1372</b>    |
| <i>AKs+AK-HSDHs+TSI+THAs</i> | <i>THAs+TD1</i>                    | <b>0.5160</b>  | <b>0.1268</b>    |
| <i>AKs+AK-HSDHs+TSI+THAs</i> | <i>TSI</i>                         | <b>0.6432</b>  | <b>0.0448</b>    |
| <i>AKs+DHDPSs</i>            | <i>AK1</i>                         | -0.1213        | 0.7384           |
| <i>AKs+DHDPSs</i>            | <i>AK1+AK2</i>                     | <b>0.9817</b>  | <b>&lt;.0001</b> |
| <i>AKs+DHDPSs</i>            | <i>AK1+AK3</i>                     | 0.0451         | 0.9016           |
| <i>AKs+DHDPSs</i>            | <i>AK2</i>                         | <b>0.9717</b>  | <b>&lt;.0001</b> |
| <i>AKs+DHDPSs</i>            | <i>AK2+AK3</i>                     | <b>0.9785</b>  | <b>&lt;.0001</b> |
| <i>AKs+DHDPSs</i>            | <i>AK3</i>                         | 0.1876         | 0.6038           |
| <i>AKs+DHDPSs</i>            | <i>AK-HSDH1</i>                    | <b>-0.4751</b> | <b>0.1652</b>    |



|                                           |                                    |                |                  |
|-------------------------------------------|------------------------------------|----------------|------------------|
| <i>AKs+DHDPSs</i>                         | <i>AK-HSDH2</i>                    | 0.0284         | 0.9379           |
| <i>AKs+DHDPSs</i>                         | <i>AK-HSDHs</i>                    | -0.2484        | 0.4890           |
| <b><i>AKs+DHDPSs</i></b>                  | <b><i>AKs</i></b>                  | <b>0.9992</b>  | <b>&lt;.0001</b> |
| <i>AKs+DHDPSs</i>                         | <i>AKs+AK-HSDHs</i>                | <b>0.9720</b>  | <b>&lt;.0001</b> |
| <i>AKs+DHDPSs</i>                         | <i>AKs+AK-HSDHs+DHDPSs</i>         | <b>0.9679</b>  | <b>&lt;.0001</b> |
| <i>AKs+DHDPSs</i>                         | <i>BCAT1</i>                       | -0.1289        | 0.7227           |
| <b><i>AKs+DHDPSs</i></b>                  | <b>Biosynthetic genes analyzed</b> | <b>0.7272</b>  | <b>0.0172</b>    |
| <i>AKs+DHDPSs</i>                         | Catabolic genes analyzed           | -0.2899        | 0.4165           |
| <i>AKs+DHDPSs</i>                         | <i>CGS1</i>                        | -0.0210        | 0.9541           |
| <i>AKs+DHDPSs</i>                         | <i>DHDPS1</i>                      | 0.1411         | 0.6975           |
| <i>AKs+DHDPSs</i>                         | <i>DHDPS2</i>                      | 0.0262         | 0.9426           |
| <i>AKs+DHDPSs</i>                         | <i>DHDPSs</i>                      | 0.1073         | 0.7679           |
| <i>AKs+DHDPSs</i>                         | <i>LKR-SDH1</i>                    | 0.3005         | 0.3989           |
| <i>AKs+DHDPSs</i>                         | <i>SAMS1</i>                       | -0.2211        | 0.5392           |
| <i>AKs+DHDPSs</i>                         | <i>SAMS2</i>                       | 0.1716         | 0.6354           |
| <i>AKs+DHDPSs</i>                         | <i>SAMS3</i>                       | -0.2473        | 0.4909           |
| <i>AKs+DHDPSs</i>                         | <i>SAMS4</i>                       | -0.2312        | 0.5204           |
| <i>AKs+DHDPSs</i>                         | <i>SAMSs</i>                       | -0.2926        | 0.4120           |
| <i>AKs+DHDPSs</i>                         | <i>TD1</i>                         | 0.0468         | 0.8978           |
| <i>AKs+DHDPSs</i>                         | <i>THA1</i>                        | -0.0561        | 0.8777           |
| <b><i>AKs+DHDPSs</i></b>                  | <b><i>THA2</i></b>                 | <b>0.4551</b>  | <b>0.1863</b>    |
| <b><i>AKs+DHDPSs</i></b>                  | <b><i>THAs</i></b>                 | <b>0.5366</b>  | <b>0.1098</b>    |
| <i>AKs+DHDPSs</i>                         | <i>THAs+TD1</i>                    | 0.1368         | 0.7062           |
| <i>AKs+DHDPSs</i>                         | <i>TS1</i>                         | 0.0931         | 0.7980           |
| <i>BCAT1</i>                              | <i>AK1</i>                         | 0.0978         | 0.7881           |
| <i>BCAT1</i>                              | <i>AK2</i>                         | -0.0757        | 0.8353           |
| <i>BCAT1</i>                              | <i>AK3</i>                         | -0.2499        | 0.4862           |
| <i>BCAT1</i>                              | <i>AK-HSDH1</i>                    | 0.3455         | 0.3281           |
| <b><i>BCAT1</i></b>                       | <b><i>AK-HSDH2</i></b>             | <b>-0.4400</b> | <b>0.2032</b>    |
| <i>BCAT1</i>                              | <i>CGS1</i>                        | -0.2863        | 0.4226           |
| <b><i>BCAT1</i></b>                       | <b><i>DHDPS1</i></b>               | <b>-0.6254</b> | <b>0.0531</b>    |
| <b><i>BCAT1</i></b>                       | <b><i>DHDPS2</i></b>               | <b>-0.4806</b> | <b>0.1597</b>    |
| <i>BCAT1</i>                              | <i>LKR-SDH1</i>                    | -0.1498        | 0.6795           |
| <b><i>BCAT1</i></b>                       | <b><i>SAMS1</i></b>                | <b>-0.8325</b> | <b>0.0028</b>    |
| <b><i>BCAT1</i></b>                       | <b><i>SAMS2</i></b>                | <b>-0.7326</b> | <b>0.0160</b>    |
| <i>BCAT1</i>                              | <i>SAMS3</i>                       | 0.1221         | 0.7369           |
| <i>BCAT1</i>                              | <i>SAMS4</i>                       | -0.2971        | 0.4044           |
| <b><i>BCAT1</i></b>                       | <b><i>TD1</i></b>                  | <b>-0.7622</b> | <b>0.0104</b>    |
| <i>BCAT1</i>                              | <i>THA1</i>                        | 0.1192         | 0.7428           |
| <i>BCAT1</i>                              | <i>THA2</i>                        | -0.1096        | 0.7631           |
| <i>BCAT1</i>                              | <i>TS1</i>                         | -0.2504        | 0.4853           |
| <i>BCAT1</i>                              | <i>AK1</i>                         | -0.2397        | 0.5047           |
| <b>Biosynthetic genes analyzed</b>        | <b><i>AK2</i></b>                  | <b>0.7050</b>  | <b>0.0228</b>    |
| <i>Biosynthetic genes analyzed</i>        | <i>AK3</i>                         | 0.2170         | 0.5470           |
| <i>Biosynthetic genes analyzed</i>        | <i>AK-HSDH1</i>                    | 0.0880         | 0.8090           |
| <b><i>Biosynthetic genes analyzed</i></b> | <b><i>AK-HSDH2</i></b>             | <b>0.4788</b>  | <b>0.1615</b>    |
| <i>Biosynthetic genes analyzed</i>        | <i>AK-HSDHs</i>                    | 0.3630         | 0.3025           |
| <b><i>Biosynthetic genes analyzed</i></b> | <b><i>AKs</i></b>                  | <b>0.7071</b>  | <b>0.0222</b>    |
| <b><i>Biosynthetic genes analyzed</i></b> | <b><i>AKs+AK-HSDHs</i></b>         | <b>0.8297</b>  | <b>0.0030</b>    |
| <i>Biosynthetic genes analyzed</i>        | <i>BCAT1</i>                       | -0.2673        | 0.4552           |
| <b><i>Biosynthetic genes analyzed</i></b> | <b><i>CGS1</i></b>                 | <b>0.5450</b>  | <b>0.1033</b>    |
| <i>Biosynthetic genes analyzed</i>        | <i>DHDPS1</i>                      | 0.2574         | 0.4727           |
| <b><i>Biosynthetic genes analyzed</i></b> | <b><i>DHDPS2</i></b>               | <b>0.5858</b>  | <b>0.0752</b>    |
| <b><i>Biosynthetic genes analyzed</i></b> | <b><i>DHDPSs</i></b>               | <b>0.5550</b>  | <b>0.0958</b>    |
| <i>Biosynthetic genes analyzed</i>        | <i>LKR-SDH1</i>                    | -0.1093        | 0.7638           |
| <i>Biosynthetic genes analyzed</i>        | <i>SAMS1</i>                       | 0.0874         | 0.8103           |
| <b><i>Biosynthetic genes analyzed</i></b> | <b><i>SAMS2</i></b>                | <b>0.5013</b>  | <b>0.1399</b>    |

|                                    |                                         |                |                  |
|------------------------------------|-----------------------------------------|----------------|------------------|
| Biosynthetic genes analyzed        | <i>SAMS3</i>                            | 0.2291         | 0.5243           |
| <b>Biosynthetic genes analyzed</b> | <b><i>SAMS4</i></b>                     | <b>0.4054</b>  | <b>0.2452</b>    |
| Biosynthetic genes analyzed        | <i>SAMSs</i>                            | 0.2816         | 0.4306           |
| <b>Biosynthetic genes analyzed</b> | <b><i>TD1</i></b>                       | <b>0.5178</b>  | <b>0.1253</b>    |
| Biosynthetic genes analyzed        | <i>THA1</i>                             | -0.3894        | 0.2660           |
| <b>Biosynthetic genes analyzed</b> | <b><i>THA2</i></b>                      | <b>0.4845</b>  | <b>0.1558</b>    |
| <b>Biosynthetic genes analyzed</b> | <b><i>THAs</i></b>                      | <b>0.4961</b>  | <b>0.1447</b>    |
| <b>Biosynthetic genes analyzed</b> | <b><i>TS1</i></b>                       | <b>0.7124</b>  | <b>0.0208</b>    |
| Catabolic genes analyzed           | <i>AK1</i>                              | 0.1243         | 0.7323           |
| Catabolic genes analyzed           | <i>AK2</i>                              | -0.3511        | 0.3199           |
| Catabolic genes analyzed           | <i>AK3</i>                              | 0.0881         | 0.8087           |
| <b>Catabolic genes analyzed</b>    | <b><i>AK-HSDH1</i></b>                  | <b>0.6038</b>  | <b>0.0645</b>    |
| <b>Catabolic genes analyzed</b>    | <b><i>AK-HSDH2</i></b>                  | <b>0.7832</b>  | <b>0.0074</b>    |
| <b>Catabolic genes analyzed</b>    | <b><i>AK-HSDHs</i></b>                  | <b>0.8495</b>  | <b>0.0019</b>    |
| Catabolic genes analyzed           | <i>AKs</i>                              | -0.3165        | 0.3729           |
| Catabolic genes analyzed           | <i>AKs+AK-HSDHs</i>                     | -0.1037        | 0.7756           |
| Catabolic genes analyzed           | <i>BCAT1</i>                            | -0.2748        | 0.4423           |
| Catabolic genes analyzed           | Biosynthetic genes analyzed             | 0.2857         | 0.4235           |
| <b>Catabolic genes analyzed</b>    | <b><i>CGS1</i></b>                      | <b>0.6532</b>  | <b>0.0406</b>    |
| Catabolic genes analyzed           | <i>DHDPS1</i>                           | 0.0468         | 0.8978           |
| <b>Catabolic genes analyzed</b>    | <b><i>DHDPS2</i></b>                    | <b>0.8364</b>  | <b>0.0026</b>    |
| <b>Catabolic genes analyzed</b>    | <b><i>DHDPSs</i></b>                    | <b>0.6189</b>  | <b>0.0564</b>    |
| <b>Catabolic genes analyzed</b>    | <b><i>LKR-SDH1</i></b>                  | <b>-0.7159</b> | <b>0.0199</b>    |
| <b>Catabolic genes analyzed</b>    | <b><i>SAMS1</i></b>                     | <b>0.5235</b>  | <b>0.1204</b>    |
| Catabolic genes analyzed           | <i>SAMS2</i>                            | 0.3217         | 0.3647           |
| <b>Catabolic genes analyzed</b>    | <b><i>SAMS3</i></b>                     | <b>0.8832</b>  | <b>0.0007</b>    |
| <b>Catabolic genes analyzed</b>    | <b><i>SAMS4</i></b>                     | <b>0.9615</b>  | <b>&lt;.0001</b> |
| <b>Catabolic genes analyzed</b>    | <b><i>SAMSs</i></b>                     | <b>1.0000</b>  | <b>&lt;.0001</b> |
| <b>Catabolic genes analyzed</b>    | <b><i>TD1</i></b>                       | <b>0.6879</b>  | <b>0.0279</b>    |
| <b>Catabolic genes analyzed</b>    | <b><i>THA1</i></b>                      | <b>-0.6937</b> | <b>0.0261</b>    |
| Catabolic genes analyzed           | <i>THA2</i>                             | -0.2401        | 0.5041           |
| Catabolic genes analyzed           | <i>THAs</i>                             | -0.3374        | 0.3404           |
| <b>Catabolic genes analyzed</b>    | <b><i>TS1</i></b>                       | <b>0.5402</b>  | <b>0.1070</b>    |
| <i>CGS1</i>                        | <i>AK1</i>                              | -0.3876        | 0.2684           |
| <i>CGS1</i>                        | <i>AK2</i>                              | 0.0487         | 0.8937           |
| <i>CGS1</i>                        | <i>AK3</i>                              | -0.0205        | 0.9551           |
| <b><i>CGS1</i></b>                 | <b><i>AK-HSDH1</i></b>                  | <b>0.4040</b>  | <b>0.2469</b>    |
| <b><i>CGS1</i></b>                 | <b><i>AK-HSDH2</i></b>                  | <b>0.6301</b>  | <b>0.0509</b>    |
| <i>CGS1</i>                        | <i>DHDPS1</i>                           | -0.1180        | 0.7455           |
| <b><i>CGS1</i></b>                 | <b><i>DHDPS2</i></b>                    | <b>0.7182</b>  | <b>0.0193</b>    |
| <b><i>CGS1/SAMSs</i></b>           | <b><i>(AK-HSDHs+CGS1)/SAMSs</i></b>     | <b>0.8290</b>  | <b>0.0030</b>    |
| <b><i>CGS1/SAMSs</i></b>           | <b><i>(AKs+AK-HSDHs)/AK-HSDHs</i></b>   | <b>0.6566</b>  | <b>0.0392</b>    |
| <b><i>CGS1/SAMSs</i></b>           | <b><i>(AKs+AK-HSDHs+CGS1)/SAMSs</i></b> | <b>0.6851</b>  | <b>0.0288</b>    |
| <i>CGS1/SAMSs</i>                  | <i>(AKs+AK-HSDHs+DHDPSs)/LKR-SDH1</i>   | -0.2670        | 0.4559           |
| <i>CGS1/SAMSs</i>                  | <i>(AKs+DHDPSs)/LKR-SDH1</i>            | -0.1032        | 0.7766           |
| <b><i>CGS1/SAMSs</i></b>           | <b><i>AK1</i></b>                       | <b>-0.5117</b> | <b>0.1306</b>    |
| <i>CGS1/SAMSs</i>                  | <i>AK1+AK2</i>                          | 0.3494         | 0.3223           |
| <b><i>CGS1/SAMSs</i></b>           | <b><i>AK1+AK3</i></b>                   | <b>-0.5267</b> | <b>0.1178</b>    |
| <b><i>CGS1/SAMSs</i></b>           | <b><i>AK2</i></b>                       | <b>0.4430</b>  | <b>0.1998</b>    |
| <b><i>CGS1/SAMSs</i></b>           | <b><i>AK2+AK3</i></b>                   | <b>0.4172</b>  | <b>0.2303</b>    |
| <i>CGS1/SAMSs</i>                  | <i>AK3</i>                              | -0.0660        | 0.8563           |
| <b><i>CGS1/SAMSs</i></b>           | <b><i>AK-HSDH1</i></b>                  | <b>-0.5350</b> | <b>0.1110</b>    |
| <b><i>CGS1/SAMSs</i></b>           | <b><i>AK-HSDH2</i></b>                  | <b>-0.5678</b> | <b>0.0869</b>    |
| <b><i>CGS1/SAMSs</i></b>           | <b><i>AK-HSDHs</i></b>                  | <b>-0.6689</b> | <b>0.0345</b>    |
| <b><i>CGS1/SAMSs</i></b>           | <b><i>AK-HSDHs+CGS1</i></b>             | <b>-0.4420</b> | <b>0.2009</b>    |
| <b><i>CGS1/SAMSs</i></b>           | <b><i>AK-HSDHs+TS1</i></b>              | <b>-0.4609</b> | <b>0.1801</b>    |
| <b><i>CGS1/SAMSs</i></b>           | <b><i>AK-HSDHs+TS1+TD1</i></b>          | <b>-0.4694</b> | <b>0.1711</b>    |

|                   |                                       |                |               |
|-------------------|---------------------------------------|----------------|---------------|
| <i>CGS1/SAMSs</i> | <i>AK-HSDHs+TS1+THAs</i>              | <b>-0.4456</b> | <b>0.1969</b> |
| <i>CGS1/SAMSs</i> | <i>AKs</i>                            | 0.3306         | 0.3508        |
| <i>CGS1/SAMSs</i> | <i>AKs/AK-HSDHs</i>                   | <b>0.6566</b>  | <b>0.0392</b> |
| <i>CGS1/SAMSs</i> | <i>AKs+AK-HSDHs</i>                   | 0.1662         | 0.6462        |
| <i>CGS1/SAMSs</i> | <i>AKs+AK-HSDHs+CGS1</i>              | 0.1323         | 0.7157        |
| <i>CGS1/SAMSs</i> | <i>AKs+AK-HSDHs+DHDPSs</i>            | 0.1444         | 0.6906        |
| <i>CGS1/SAMSs</i> | <i>AKs+AK-HSDHs+TS1</i>               | -0.0137        | 0.9701        |
| <i>CGS1/SAMSs</i> | <i>AKs+AK-HSDHs+TS1+TD1</i>           | -0.0412        | 0.9100        |
| <i>CGS1/SAMSs</i> | <i>AKs+AK-HSDHs+TS1+THAs</i>          | -0.0050        | 0.9891        |
| <i>CGS1/SAMSs</i> | <i>AKs+DHDPSs</i>                     | 0.3086         | 0.3856        |
| <i>CGS1/SAMSs</i> | <i>BCAT1</i>                          | 0.0367         | 0.9198        |
| <i>CGS1/SAMSs</i> | Biosynthetic genes analyzed           | -0.0467        | 0.8981        |
| <i>CGS1/SAMSs</i> | <b>Catabolic genes analyzed</b>       | <b>-0.8081</b> | <b>0.0047</b> |
| <i>CGS1/SAMSs</i> | <i>CGS1</i>                           | -0.1149        | 0.7520        |
| <i>CGS1/SAMSs</i> | <i>DHDPS1</i>                         | -0.1093        | 0.7636        |
| <i>CGS1/SAMSs</i> | <i>DHDPS2</i>                         | <b>-0.5994</b> | <b>0.0670</b> |
| <i>CGS1/SAMSs</i> | <i>DHDPSs</i>                         | <b>-0.5094</b> | <b>0.1326</b> |
| <i>CGS1/SAMSs</i> | <i>DHDPSs/LKR-SDHI</i>                | <b>-0.6879</b> | <b>0.0279</b> |
| <i>CGS1/SAMSs</i> | <i>LKR-SDHI</i>                       | <b>0.4779</b>  | <b>0.1624</b> |
| <i>CGS1/SAMSs</i> | <i>SAMS1</i>                          | -0.2745        | 0.4427        |
| <i>CGS1/SAMSs</i> | <i>SAMS2</i>                          | -0.1607        | 0.6575        |
| <i>CGS1/SAMSs</i> | <i>SAMS3</i>                          | <b>-0.8089</b> | <b>0.0046</b> |
| <i>CGS1/SAMSs</i> | <i>SAMS4</i>                          | <b>-0.7041</b> | <b>0.0230</b> |
| <i>CGS1/SAMSs</i> | <i>SAMSs</i>                          | <b>-0.8086</b> | <b>0.0046</b> |
| <i>CGS1/SAMSs</i> | <i>TD1</i>                            | <b>-0.4405</b> | <b>0.2026</b> |
| <i>CGS1/SAMSs</i> | <i>THA1</i>                           | 0.3883         | 0.2675        |
| <i>CGS1/SAMSs</i> | <i>THA2</i>                           | <b>0.6274</b>  | <b>0.0522</b> |
| <i>CGS1/SAMSs</i> | <i>THAs</i>                           | <b>0.6592</b>  | <b>0.0381</b> |
| <i>CGS1/SAMSs</i> | <i>THAs+TD1</i>                       | -0.2968        | 0.4050        |
| <i>CGS1/SAMSs</i> | <i>TS1</i>                            | -0.3062        | 0.3895        |
| <i>CGS1/TS1</i>   | <i>(AK-HSDHs+CGS1)/SAMSs</i>          | 0.3041         | 0.3930        |
| <i>CGS1/TS1</i>   | <i>(AK-HSDHs+TS1)/(THAs+TD1)</i>      | -0.1634        | 0.6520        |
| <i>CGS1/TS1</i>   | <i>(AK-HSDHs+TS1+TD1)/BCAT1</i>       | -0.0370        | 0.9192        |
| <i>CGS1/TS1</i>   | <i>(AKs+AK-HSDHs)/AK-HSDHs</i>        | 0.2703         | 0.4500        |
| <i>CGS1/TS1</i>   | <i>(AKs+AK-HSDHs+CGS1)/SAMSs</i>      | 0.1636         | 0.6515        |
| <i>CGS1/TS1</i>   | <i>(AKs+AK-HSDHs+DHDPSs)/LKR-SDHI</i> | 0.1265         | 0.7277        |
| <i>CGS1/TS1</i>   | <i>(AKs+AK-HSDHs+TS1)/(THAs+TD1)</i>  | 0.0653         | 0.8577        |
| <i>CGS1/TS1</i>   | <i>(AKs+AK-HSDHs+TS1+TD1)/BCAT1</i>   | -0.0220        | 0.9519        |
| <i>CGS1/TS1</i>   | <i>(AKs+DHDPSs)/LKR-SDHI</i>          | 0.2059         | 0.5682        |
| <i>CGS1/TS1</i>   | <i>AK1</i>                            | -0.1793        | 0.6201        |
| <i>CGS1/TS1</i>   | <i>AK1+AK2</i>                        | 0.0722         | 0.8429        |
| <i>CGS1/TS1</i>   | <i>AK1+AK3</i>                        | -0.1980        | 0.5835        |
| <i>CGS1/TS1</i>   | <i>AK2</i>                            | 0.1086         | 0.7653        |
| <i>CGS1/TS1</i>   | <i>AK2+AK3</i>                        | 0.0974         | 0.7890        |
| <i>CGS1/TS1</i>   | <i>AK3</i>                            | -0.0352        | 0.9231        |
| <i>CGS1/TS1</i>   | <i>AK-HSDH1</i>                       | <b>-0.4396</b> | <b>0.2037</b> |
| <i>CGS1/TS1</i>   | <i>AK-HSDH2</i>                       | 0.0073         | 0.9840        |
| <i>CGS1/TS1</i>   | <i>AK-HSDHs</i>                       | -0.2432        | 0.4984        |
| <i>CGS1/TS1</i>   | <i>AK-HSDHs+CGS1</i>                  | -0.0842        | 0.8170        |
| <i>CGS1/TS1</i>   | <i>AK-HSDHs+TS1</i>                   | <b>-0.5998</b> | <b>0.0668</b> |
| <i>CGS1/TS1</i>   | <i>AK-HSDHs+TS1+TD1</i>               | <b>-0.5917</b> | <b>0.0715</b> |
| <i>CGS1/TS1</i>   | <i>AK-HSDHs+TS1+THAs</i>              | <b>-0.5999</b> | <b>0.0667</b> |
| <i>CGS1/TS1</i>   | <i>AKs</i>                            | 0.0641         | 0.8603        |
| <i>CGS1/TS1</i>   | <i>AKs/AK-HSDHs</i>                   | 0.2703         | 0.4500        |
| <i>CGS1/TS1</i>   | <i>AKs+AK-HSDHs</i>                   | 0.0033         | 0.9928        |
| <i>CGS1/TS1</i>   | <i>AKs+AK-HSDHs+CGS1</i>              | 0.0247         | 0.9459        |
| <i>CGS1/TS1</i>   | <i>AKs+AK-HSDHs+DHDPSs</i>            | -0.0182        | 0.9603        |

|                        |                              |                |               |
|------------------------|------------------------------|----------------|---------------|
| <i>CGS1/TS1</i>        | <i>AKs+AK-HSDHs+TS1</i>      | -0.3182        | 0.3702        |
| <i>CGS1/TS1</i>        | <i>AKs+AK-HSDHs+TS1+TD1</i>  | -0.3295        | 0.3525        |
| <i>CGS1/TS1</i>        | <i>AKs+AK-HSDHs+TS1+THAs</i> | -0.3149        | 0.3755        |
| <i>CGS1/TS1</i>        | <i>AKs+DHDPSs</i>            | 0.0427         | 0.9068        |
| <i>CGS1/TS1</i>        | <i>BCAT1</i>                 | -0.0380        | 0.9169        |
| <i>CGS1/TS1</i>        | Biosynthetic genes analyzed  | -0.2862        | 0.4228        |
| <i>CGS1/TS1</i>        | Catabolic genes analyzed     | -0.1579        | 0.6630        |
| <i>CGS1/TS1</i>        | <i>CGS1</i>                  | 0.1002         | 0.7831        |
| <i>CGS1/TS1</i>        | <i>CGS1/SAMSs</i>            | 0.3805         | 0.2780        |
| <b><i>CGS1/TS1</i></b> | <b><i>DHDPS1</i></b>         | <b>-0.6308</b> | <b>0.0505</b> |
| <i>CGS1/TS1</i>        | <i>DHDPS2</i>                | -0.2408        | 0.5027        |
| <b><i>CGS1/TS1</i></b> | <b><i>DHDPSs</i></b>         | <b>-0.5476</b> | <b>0.1013</b> |
| <i>CGS1/TS1</i>        | <i>DHDPSs/AK-HSDHs</i>       | 0.0721         | 0.8432        |
| <i>CGS1/TS1</i>        | <i>DHDPSs/LKR-SDH1</i>       | -0.1404        | 0.6988        |
| <i>CGS1/TS1</i>        | <i>LKR-SDH1</i>              | -0.2800        | 0.4334        |
| <i>CGS1/TS1</i>        | <i>SAMS1</i>                 | 0.0047         | 0.9897        |
| <b><i>CGS1/TS1</i></b> | <b><i>SAMS2</i></b>          | <b>-0.5344</b> | <b>0.1116</b> |
| <i>CGS1/TS1</i>        | <i>SAMS3</i>                 | -0.1396        | 0.7006        |
| <i>CGS1/TS1</i>        | <i>SAMS4</i>                 | -0.2278        | 0.5267        |
| <i>CGS1/TS1</i>        | <i>SAMSs</i>                 | -0.1534        | 0.6722        |
| <i>CGS1/TS1</i>        | <i>TD1</i>                   | -0.3286        | 0.3539        |
| <i>CGS1/TS1</i>        | <i>TD1/BCAT1</i>             | -0.0397        | 0.9133        |
| <i>CGS1/TS1</i>        | <i>THA1</i>                  | -0.2625        | 0.4637        |
| <i>CGS1/TS1</i>        | <i>THA2</i>                  | 0.0633         | 0.8621        |
| <i>CGS1/TS1</i>        | <i>THAs</i>                  | 0.0126         | 0.9724        |
| <i>CGS1/TS1</i>        | <i>THAs+TD1</i>              | -0.3253        | 0.3590        |
| <b><i>CGS1/TS1</i></b> | <b><i>TS1</i></b>            | <b>-0.6805</b> | <b>0.0303</b> |
| <i>CGS1/TS1</i>        | <i>TS1/(THAs+TD1)</i>        | -0.2094        | 0.5616        |
| <i>CGS1/TS1</i>        | <i>TS1/TD1</i>               | 0.0145         | 0.9683        |
| <b><i>CGS1/TS1</i></b> | <b><i>TS1/THAs</i></b>       | <b>-0.4269</b> | <b>0.2185</b> |
| <i>DHDPS1</i>          | <i>AK1</i>                   | 0.1099         | 0.7625        |
| <i>DHDPS1</i>          | <i>AK2</i>                   | 0.0759         | 0.8349        |
| <i>DHDPS1</i>          | <i>AK3</i>                   | 0.0628         | 0.8631        |
| <i>DHDPS1</i>          | <i>AK-HSDH1</i>              | -0.1056        | 0.7716        |
| <i>DHDPS1</i>          | <i>AK-HSDH2</i>              | -0.0317        | 0.9308        |
| <i>DHDPS2</i>          | <i>AK1</i>                   | -0.0351        | 0.9233        |
| <i>DHDPS2</i>          | <i>AK2</i>                   | -0.0212        | 0.9537        |
| <i>DHDPS2</i>          | <i>AK3</i>                   | 0.1275         | 0.7257        |
| <i>DHDPS2</i>          | <i>AK-HSDH1</i>              | 0.3375         | 0.3403        |
| <b><i>DHDPS2</i></b>   | <b><i>AK-HSDH2</i></b>       | <b>0.8639</b>  | <b>0.0013</b> |
| <i>DHDPS2</i>          | <i>DHDPS1</i>                | 0.1807         | 0.6174        |
| <i>DHDPSs</i>          | <i>AK1</i>                   | 0.0678         | 0.8523        |
| <i>DHDPSs</i>          | <i>AK2</i>                   | 0.0276         | 0.9396        |
| <i>DHDPSs</i>          | <i>AK3</i>                   | 0.1368         | 0.7062        |
| <i>DHDPSs</i>          | <i>AK-HSDH1</i>              | 0.1662         | 0.6463        |
| <b><i>DHDPSs</i></b>   | <b><i>AK-HSDH2</i></b>       | <b>0.5851</b>  | <b>0.0756</b> |
| <b><i>DHDPSs</i></b>   | <b><i>AK-HSDHs</i></b>       | <b>0.4764</b>  | <b>0.1640</b> |
| <i>DHDPSs</i>          | <i>AKs</i>                   | 0.0676         | 0.8529        |
| <i>DHDPSs</i>          | <i>AKs+AK-HSDHs</i>          | 0.1962         | 0.5869        |
| <b><i>DHDPSs</i></b>   | <b><i>BCAT1</i></b>          | <b>-0.7088</b> | <b>0.0218</b> |
| <b><i>DHDPSs</i></b>   | <b><i>CGS1</i></b>           | <b>0.4066</b>  | <b>0.2436</b> |
| <b><i>DHDPSs</i></b>   | <b><i>DHDPS1</i></b>         | <b>0.7302</b>  | <b>0.0165</b> |
| <b><i>DHDPSs</i></b>   | <b><i>DHDPS2</i></b>         | <b>0.8025</b>  | <b>0.0052</b> |
| <i>DHDPSs</i>          | <i>LKR-SDH1</i>              | -0.0368        | 0.9197        |
| <b><i>DHDPSs</i></b>   | <b><i>SAMS1</i></b>          | <b>0.6726</b>  | <b>0.0331</b> |
| <b><i>DHDPSs</i></b>   | <b><i>SAMS2</i></b>          | <b>0.8541</b>  | <b>0.0017</b> |
| <i>DHDPSs</i>          | <i>SAMS3</i>                 | 0.3353         | 0.3435        |

|                        |                                       |                |                  |
|------------------------|---------------------------------------|----------------|------------------|
| <i>DHDPSs</i>          | <i>SAMS4</i>                          | <b>0.6573</b>  | <b>0.0389</b>    |
| <i>DHDPSs</i>          | <i>TD1</i>                            | <b>0.9197</b>  | <b>0.0002</b>    |
| <i>DHDPSs</i>          | <i>THA1</i>                           | -0.2383        | 0.5074           |
| <i>DHDPSs</i>          | <i>THA2</i>                           | 0.0000         | 1.0000           |
| <i>DHDPSs</i>          | <i>TS1</i>                            | <b>0.7481</b>  | <b>0.0128</b>    |
| <i>DHDPSs/AK-HSDHs</i> | <i>(AK-HSDHs+CGS1)/SAMSs</i>          | 0.1300         | 0.7203           |
| <i>DHDPSs/AK-HSDHs</i> | <i>(AK-HSDHs+TS1)/(THAs+TD1)</i>      | <b>-0.5210</b> | <b>0.1225</b>    |
| <i>DHDPSs/AK-HSDHs</i> | <i>(AK-HSDHs+TS1+TD1)/BCAT1</i>       | -0.2264        | 0.5294           |
| <i>DHDPSs/AK-HSDHs</i> | <i>(AKs+AK-HSDHs)/AK-HSDHs</i>        | <b>0.8347</b>  | <b>0.0027</b>    |
| <i>DHDPSs/AK-HSDHs</i> | <i>(AKs+AK-HSDHs+CGS1)/SAMSs</i>      | <b>0.5940</b>  | <b>0.0702</b>    |
| <i>DHDPSs/AK-HSDHs</i> | <i>(AKs+AK-HSDHs+DHDPSs)/LKR-SDHI</i> | <b>-0.7176</b> | <b>0.0195</b>    |
| <i>DHDPSs/AK-HSDHs</i> | <i>(AKs+AK-HSDHs+TS1)/(THAs+TD1)</i>  | -0.2093        | 0.5616           |
| <i>DHDPSs/AK-HSDHs</i> | <i>(AKs+AK-HSDHs+TS1+TD1)/BCAT1</i>   | -0.2009        | 0.5778           |
| <i>DHDPSs/AK-HSDHs</i> | <i>(AKs+DHDPSs)/LKR-SDHI</i>          | <b>-0.5282</b> | <b>0.1166</b>    |
| <i>DHDPSs/AK-HSDHs</i> | <i>AK1</i>                            | -0.1145        | 0.7529           |
| <i>DHDPSs/AK-HSDHs</i> | <i>AK1+AK2</i>                        | 0.3312         | 0.3499           |
| <i>DHDPSs/AK-HSDHs</i> | <i>AK1+AK3</i>                        | -0.0714        | 0.8447           |
| <i>DHDPSs/AK-HSDHs</i> | <i>AK2</i>                            | 0.3424         | 0.3328           |
| <i>DHDPSs/AK-HSDHs</i> | <i>AK2+AK3</i>                        | 0.3395         | 0.3372           |
| <i>DHDPSs/AK-HSDHs</i> | <i>AK3</i>                            | 0.0431         | 0.9060           |
| <i>DHDPSs/AK-HSDHs</i> | <i>AK-HSDH1</i>                       | <b>-0.8179</b> | <b>0.0038</b>    |
| <i>DHDPSs/AK-HSDHs</i> | <i>AK-HSDH2</i>                       | <b>-0.7431</b> | <b>0.0138</b>    |
| <i>DHDPSs/AK-HSDHs</i> | <i>AK-HSDHs</i>                       | <b>-0.9446</b> | <b>&lt;.0001</b> |
| <i>DHDPSs/AK-HSDHs</i> | <i>AK-HSDHs+CGS1</i>                  | <b>-0.8611</b> | <b>0.0014</b>    |
| <i>DHDPSs/AK-HSDHs</i> | <i>AK-HSDHs+TS1</i>                   | <b>-0.6291</b> | <b>0.0514</b>    |
| <i>DHDPSs/AK-HSDHs</i> | <i>AK-HSDHs+TS1+TD1</i>               | <b>-0.6065</b> | <b>0.0630</b>    |
| <i>DHDPSs/AK-HSDHs</i> | <i>AK-HSDHs+TS1+THAs</i>              | <b>-0.6176</b> | <b>0.0571</b>    |
| <i>DHDPSs/AK-HSDHs</i> | <i>AKs</i>                            | 0.3336         | 0.3462           |
| <i>DHDPSs/AK-HSDHs</i> | <i>AKs/AK-HSDHs</i>                   | <b>0.8347</b>  | <b>0.0027</b>    |
| <i>DHDPSs/AK-HSDHs</i> | <i>AKs+AK-HSDHs</i>                   | 0.0973         | 0.7892           |
| <i>DHDPSs/AK-HSDHs</i> | <i>AKs+AK-HSDHs+CGS1</i>              | -0.0454        | 0.9009           |
| <i>DHDPSs/AK-HSDHs</i> | <i>AKs+AK-HSDHs+DHDPSs</i>            | 0.0864         | 0.8123           |
| <i>DHDPSs/AK-HSDHs</i> | <i>AKs+AK-HSDHs+TS1</i>               | -0.1149        | 0.7519           |
| <i>DHDPSs/AK-HSDHs</i> | <i>AKs+AK-HSDHs+TS1+TD1</i>           | -0.1271        | 0.7264           |
| <i>DHDPSs/AK-HSDHs</i> | <i>AKs+AK-HSDHs+TS1+THAs</i>          | -0.1081        | 0.7663           |
| <i>DHDPSs/AK-HSDHs</i> | <i>AKs+DHDPSs</i>                     | 0.3214         | 0.3651           |
| <i>DHDPSs/AK-HSDHs</i> | <i>BCAT1</i>                          | -0.1296        | 0.7212           |
| <i>DHDPSs/AK-HSDHs</i> | Biosynthetic genes analyzed           | -0.2144        | 0.5520           |
| <i>DHDPSs/AK-HSDHs</i> | Catabolic genes analyzed              | <b>-0.7906</b> | <b>0.0065</b>    |
| <i>DHDPSs/AK-HSDHs</i> | <i>CGS1</i>                           | <b>-0.6031</b> | <b>0.0649</b>    |
| <i>DHDPSs/AK-HSDHs</i> | <i>CGS1/SAMSs</i>                     | <b>0.6260</b>  | <b>0.0529</b>    |
| <i>DHDPSs/AK-HSDHs</i> | <i>DHDPS1</i>                         | 0.3277         | 0.3553           |
| <i>DHDPSs/AK-HSDHs</i> | <i>DHDPS2</i>                         | <b>-0.6272</b> | <b>0.0523</b>    |
| <i>DHDPSs/AK-HSDHs</i> | <i>DHDPSs</i>                         | -0.2377        | 0.5084           |
| <i>DHDPSs/AK-HSDHs</i> | <i>DHDPSs/LKR-SDHI</i>                | <b>-0.9343</b> | <b>&lt;.0001</b> |
| <i>DHDPSs/AK-HSDHs</i> | <i>LKR-SDHI</i>                       | <b>0.8801</b>  | <b>0.0008</b>    |
| <i>DHDPSs/AK-HSDHs</i> | <i>SAMS1</i>                          | -0.0761        | 0.8346           |
| <i>DHDPSs/AK-HSDHs</i> | <i>SAMS2</i>                          | 0.1226         | 0.7358           |
| <i>DHDPSs/AK-HSDHs</i> | <i>SAMS3</i>                          | <b>-0.8771</b> | <b>0.0009</b>    |
| <i>DHDPSs/AK-HSDHs</i> | <i>SAMS4</i>                          | <b>-0.7611</b> | <b>0.0106</b>    |
| <i>DHDPSs/AK-HSDHs</i> | <i>SAMSs</i>                          | <b>-0.7923</b> | <b>0.0063</b>    |
| <i>DHDPSs/AK-HSDHs</i> | <i>TD1</i>                            | -0.2565        | 0.4744           |
| <i>DHDPSs/AK-HSDHs</i> | <i>TD1/BCAT1</i>                      | -0.2439        | 0.4971           |
| <i>DHDPSs/AK-HSDHs</i> | <i>THA1</i>                           | <b>0.5464</b>  | <b>0.1022</b>    |
| <i>DHDPSs/AK-HSDHs</i> | <i>THA2</i>                           | 0.3462         | 0.3271           |
| <i>DHDPSs/AK-HSDHs</i> | <i>THAs</i>                           | <b>0.4662</b>  | <b>0.1744</b>    |
| <i>DHDPSs/AK-HSDHs</i> | <i>THAs+TD1</i>                       | -0.1621        | 0.6546           |

|                                   |                                       |                |                  |
|-----------------------------------|---------------------------------------|----------------|------------------|
| <i>DHDPSs/AK-HSDHs</i>            | <i>TS1</i>                            | <b>-0.4053</b> | <b>0.2452</b>    |
| <i>DHDPSs/AK-HSDHs</i>            | <i>TS1/(THAs+TD1)</i>                 | -0.3058        | 0.3902           |
| <i>DHDPSs/AK-HSDHs</i>            | <i>TS1/TD1</i>                        | -0.3373        | 0.3406           |
| <i>DHDPSs/AK-HSDHs</i>            | <i>TS1/THAs</i>                       | <b>-0.6545</b> | <b>0.0400</b>    |
| <i>DHDPSs/LKR-SDHI</i>            | <i>(AKs+AK-HSDHs)/AK-HSDHs</i>        | <b>-0.8080</b> | <b>0.0047</b>    |
| <i>DHDPSs/LKR-SDHI</i>            | <i>(AKs+AK-HSDHs+DHDPSs)/LKR-SDHI</i> | <b>0.6526</b>  | <b>0.0408</b>    |
| <i>DHDPSs/LKR-SDHI</i>            | <i>(AKs+DHDPSs)/LKR-SDHI</i>          | <b>0.4687</b>  | <b>0.1718</b>    |
| <i>DHDPSs/LKR-SDHI</i>            | <i>AK1</i>                            | 0.0928         | 0.7988           |
| <i>DHDPSs/LKR-SDHI</i>            | <i>AK1+AK2</i>                        | -0.2923        | 0.4125           |
| <i>DHDPSs/LKR-SDHI</i>            | <i>AK1+AK3</i>                        | 0.1023         | 0.7787           |
| <i>DHDPSs/LKR-SDHI</i>            | <i>AK2</i>                            | -0.3003        | 0.3992           |
| <i>DHDPSs/LKR-SDHI</i>            | <i>AK2+AK3</i>                        | -0.2878        | 0.4200           |
| <i>DHDPSs/LKR-SDHI</i>            | <i>AK3</i>                            | 0.0212         | 0.9537           |
| <i>DHDPSs/LKR-SDHI</i>            | <i>AK-HSDHI</i>                       | <b>0.7027</b>  | <b>0.0234</b>    |
| <i>DHDPSs/LKR-SDHI</i>            | <i>AK-HSDH2</i>                       | <b>0.8695</b>  | <b>0.0011</b>    |
| <i>DHDPSs/LKR-SDHI</i>            | <i>AK-HSDHs</i>                       | <b>0.9626</b>  | <b>&lt;.0001</b> |
| <i>DHDPSs/LKR-SDHI</i>            | <i>AK-HSDHs+CGS1</i>                  | <b>0.9417</b>  | <b>&lt;.0001</b> |
| <i>DHDPSs/LKR-SDHI</i>            | <i>AK-HSDHs+TS1</i>                   | <b>0.7658</b>  | <b>0.0098</b>    |
| <i>DHDPSs/LKR-SDHI</i>            | <i>AK-HSDHs+TS1+TD1</i>               | <b>0.7617</b>  | <b>0.0105</b>    |
| <i>DHDPSs/LKR-SDHI</i>            | <i>AK-HSDHs+TS1+THAs</i>              | <b>0.7560</b>  | <b>0.0114</b>    |
| <i>DHDPSs/LKR-SDHI</i>            | <i>AKs</i>                            | -0.2836        | 0.4271           |
| <i>DHDPSs/LKR-SDHI</i>            | <i>AKs/AK-HSDHs</i>                   | <b>-0.8080</b> | <b>0.0047</b>    |
| <i>DHDPSs/LKR-SDHI</i>            | <i>AKs+AK-HSDHs</i>                   | -0.0405        | 0.9115           |
| <i>DHDPSs/LKR-SDHI</i>            | <i>AKs+AK-HSDHs+CGS1</i>              | 0.1292         | 0.7220           |
| <i>DHDPSs/LKR-SDHI</i>            | <i>AKs+AK-HSDHs+DHDPSs</i>            | -0.0197        | 0.9570           |
| <i>DHDPSs/LKR-SDHI</i>            | <i>AKs+AK-HSDHs+TS1</i>               | 0.2399         | 0.5044           |
| <i>DHDPSs/LKR-SDHI</i>            | <i>AKs+AK-HSDHs+TS1+TD1</i>           | 0.2662         | 0.4572           |
| <i>DHDPSs/LKR-SDHI</i>            | <i>AKs+AK-HSDHs+TS1+THAs</i>          | 0.2332         | 0.5166           |
| <i>DHDPSs/LKR-SDHI</i>            | <i>AKs+DHDPSs</i>                     | -0.2608        | 0.4667           |
| <i>DHDPSs/LKR-SDHI</i>            | <i>BCAT1</i>                          | -0.1525        | 0.6740           |
| <i>DHDPSs/LKR-SDHI</i>            | Biosynthetic genes analyzed           | 0.3577         | 0.3102           |
| <i>DHDPSs/LKR-SDHI</i>            | Catabolic genes analyzed              | <b>0.9189</b>  | <b>0.0002</b>    |
| <i>DHDPSs/LKR-SDHI</i>            | <i>CGS1</i>                           | <b>0.7364</b>  | <b>0.0152</b>    |
| <i>DHDPSs/LKR-SDHI</i>            | <i>DHDPS1</i>                         | -0.1216        | 0.7378           |
| <i>DHDPSs/LKR-SDHI</i>            | <i>DHDPS2</i>                         | <b>0.8475</b>  | <b>0.0020</b>    |
| <i>DHDPSs/LKR-SDHI</i>            | <i>DHDPSs</i>                         | <b>0.5148</b>  | <b>0.1279</b>    |
| <i>DHDPSs/LKR-SDHI</i>            | <i>LKR-SDHI</i>                       | <b>-0.8450</b> | <b>0.0021</b>    |
| <i>DHDPSs/LKR-SDHI</i>            | <i>SAMS1</i>                          | 0.3418         | 0.3337           |
| <i>DHDPSs/LKR-SDHI</i>            | <i>SAMS2</i>                          | 0.1550         | 0.6689           |
| <i>DHDPSs/LKR-SDHI</i>            | <i>SAMS3</i>                          | <b>0.8786</b>  | <b>0.0008</b>    |
| <i>DHDPSs/LKR-SDHI</i>            | <i>SAMS4</i>                          | <b>0.9089</b>  | <b>0.0003</b>    |
| <i>DHDPSs/LKR-SDHI</i>            | <i>SAMs</i>                           | <b>0.9198</b>  | <b>0.0002</b>    |
| <i>DHDPSs/LKR-SDHI</i>            | <i>TD1</i>                            | <b>0.5414</b>  | <b>0.1061</b>    |
| <i>DHDPSs/LKR-SDHI</i>            | <i>THA1</i>                           | <b>-0.6698</b> | <b>0.0341</b>    |
| <i>DHDPSs/LKR-SDHI</i>            | <i>THA2</i>                           | -0.2576        | 0.4724           |
| <i>DHDPSs/LKR-SDHI</i>            | <i>THAs</i>                           | -0.3620        | 0.3039           |
| <i>DHDPSs/LKR-SDHI</i>            | <i>THAs+TD1</i>                       | <b>0.4554</b>  | <b>0.1860</b>    |
| <i>DHDPSs/LKR-SDHI</i>            | <i>TS1</i>                            | <b>0.5763</b>  | <b>0.0812</b>    |
| Free (Lys+Met+Thr+Ile)/Asp        | <i>(AK-HSDHs+CGS1)/SAMs</i>           | -0.1181        | 0.7451           |
| Free (Lys+Met+Thr+Ile)/Asp        | <i>(AK-HSDHs+TS1)/(THAs+TD1)</i>      | -0.0206        | 0.9550           |
| Free (Lys+Met+Thr+Ile)/Asp        | <i>(AK-HSDHs+TS1+TD1)/BCAT1</i>       | -0.1931        | 0.5929           |
| <b>Free (Lys+Met+Thr+Ile)/Asp</b> | <i>(AKs+AK-HSDHs)/AK-HSDHs</i>        | <b>0.4854</b>  | <b>0.1550</b>    |
| <b>Free (Lys+Met+Thr+Ile)/Asp</b> | <i>(AKs+AK-HSDHs+CGS1)/SAMs</i>       | <b>0.4020</b>  | <b>0.2495</b>    |
| Free (Lys+Met+Thr+Ile)/Asp        | <i>(AKs+AK-HSDHs+DHDPSs)/LKR-SDHI</i> | -0.0896        | 0.8057           |
| Free (Lys+Met+Thr+Ile)/Asp        | <i>(AKs+AK-HSDHs+TS1)/(THAs+TD1)</i>  | 0.1967         | 0.5860           |
| Free (Lys+Met+Thr+Ile)/Asp        | <i>(AKs+AK-HSDHs+TS1+TD1)/BCAT1</i>   | -0.1808        | 0.6172           |
| Free (Lys+Met+Thr+Ile)/Asp        | <i>(AKs+DHDPSs)/LKR-SDHI</i>          | 0.0365         | 0.9203           |

|                                   |                                                      |                |               |
|-----------------------------------|------------------------------------------------------|----------------|---------------|
| <b>Free (Lys+Met+Thr+Ile)/Asp</b> | <b>AK activity with four effectors</b>               | <b>0.4270</b>  | <b>0.2184</b> |
| <b>Free (Lys+Met+Thr+Ile)/Asp</b> | <b>AK activity without effectors</b>                 | <b>0.5918</b>  | <b>0.0715</b> |
| <b>Free (Lys+Met+Thr+Ile)/Asp</b> | <b>AK activity/HSDH activity with four effectors</b> | <b>0.5783</b>  | <b>0.0799</b> |
| Free (Lys+Met+Thr+Ile)/Asp        | AK activity/HSDH activity without effectors          | 0.3932         | 0.2610        |
| Free (Lys+Met+Thr+Ile)/Asp        | <i>AK1</i>                                           | 0.0361         | 0.9212        |
| <b>Free (Lys+Met+Thr+Ile)/Asp</b> | <b><i>AK1+AK2</i></b>                                | <b>0.5103</b>  | <b>0.1318</b> |
| Free (Lys+Met+Thr+Ile)/Asp        | <i>AK1+AK3</i>                                       | -0.1433        | 0.6928        |
| <b>Free (Lys+Met+Thr+Ile)/Asp</b> | <b><i>AK2</i></b>                                    | <b>0.4837</b>  | <b>0.1566</b> |
| <b>Free (Lys+Met+Thr+Ile)/Asp</b> | <b><i>AK2+AK3</i></b>                                | <b>0.4298</b>  | <b>0.2151</b> |
| Free (Lys+Met+Thr+Ile)/Asp        | <i>AK3</i>                                           | -0.2381        | 0.5077        |
| Free (Lys+Met+Thr+Ile)/Asp        | <i>AK-HSDH1</i>                                      | -0.0611        | 0.8669        |
| <b>Free (Lys+Met+Thr+Ile)/Asp</b> | <b><i>AK-HSDH2</i></b>                               | <b>-0.5565</b> | <b>0.0948</b> |
| Free (Lys+Met+Thr+Ile)/Asp        | <i>AK-HSDHs</i>                                      | -0.3967        | 0.2564        |
| Free (Lys+Met+Thr+Ile)/Asp        | <i>AK-HSDHs+CGS1</i>                                 | -0.3382        | 0.3392        |
| Free (Lys+Met+Thr+Ile)/Asp        | <i>AK-HSDHs+TS1</i>                                  | -0.0462        | 0.8991        |
| Free (Lys+Met+Thr+Ile)/Asp        | <i>AK-HSDHs+TS1+TD1</i>                              | -0.0580        | 0.8736        |
| Free (Lys+Met+Thr+Ile)/Asp        | <i>AK-HSDHs+TS1+THAs</i>                             | -0.0346        | 0.9243        |
| <b>Free (Lys+Met+Thr+Ile)/Asp</b> | <b><i>AKs</i></b>                                    | <b>0.4587</b>  | <b>0.1824</b> |
| <b>Free (Lys+Met+Thr+Ile)/Asp</b> | <b><i>AKs/AK-HSDHs</i></b>                           | <b>0.4854</b>  | <b>0.1550</b> |
| Free (Lys+Met+Thr+Ile)/Asp        | <i>AKs+AK-HSDHs</i>                                  | 0.3721         | 0.2897        |
| Free (Lys+Met+Thr+Ile)/Asp        | <i>AKs+AK-HSDHs+CGS1</i>                             | 0.3045         | 0.3923        |
| Free (Lys+Met+Thr+Ile)/Asp        | <i>AKs+AK-HSDHs+DHDPSs</i>                           | 0.3653         | 0.2992        |
| Free (Lys+Met+Thr+Ile)/Asp        | <i>AKs+AK-HSDHs+TS1</i>                              | 0.3458         | 0.3277        |
| Free (Lys+Met+Thr+Ile)/Asp        | <i>AKs+AK-HSDHs+TS1+TD1</i>                          | 0.3246         | 0.3601        |
| Free (Lys+Met+Thr+Ile)/Asp        | <i>AKs+AK-HSDHs+TS1+THAs</i>                         | 0.3523         | 0.3181        |
| <b>Free (Lys+Met+Thr+Ile)/Asp</b> | <b><i>AKs+DHDPSs</i></b>                             | <b>0.4528</b>  | <b>0.1888</b> |
| Free (Lys+Met+Thr+Ile)/Asp        | <i>BCAT1</i>                                         | 0.3764         | 0.2837        |
| Free (Lys+Met+Thr+Ile)/Asp        | Biosynthetic genes analyzed                          | 0.2740         | 0.4437        |
| Free (Lys+Met+Thr+Ile)/Asp        | Catabolic genes analyzed                             | -0.2517        | 0.4830        |
| Free (Lys+Met+Thr+Ile)/Asp        | <i>CGS1</i>                                          | -0.2076        | 0.5649        |
| Free (Lys+Met+Thr+Ile)/Asp        | <i>CGS1/SAMSs</i>                                    | 0.1181         | 0.7452        |
| Free (Lys+Met+Thr+Ile)/Asp        | <i>CGS1/TS1</i>                                      | -0.3145        | 0.3761        |
| Free (Lys+Met+Thr+Ile)/Asp        | <i>DHDPS1</i>                                        | 0.2179         | 0.5454        |
| Free (Lys+Met+Thr+Ile)/Asp        | <i>DHDPS2</i>                                        | -0.3178        | 0.3709        |
| Free (Lys+Met+Thr+Ile)/Asp        | <i>DHDPSs</i>                                        | -0.0817        | 0.8226        |
| Free (Lys+Met+Thr+Ile)/Asp        | <i>DHDPSs/AK-HSDHs</i>                               | 0.3744         | 0.2865        |
| Free (Lys+Met+Thr+Ile)/Asp        | <i>DHDPSs/LKR-SDH1</i>                               | -0.3965        | 0.2566        |
| <b>Free (Lys+Met+Thr+Ile)/Asp</b> | <b>Free Ala</b>                                      | <b>-0.4464</b> | <b>0.1960</b> |
| Free (Lys+Met+Thr+Ile)/Asp        | Free Arg                                             | -0.3031        | 0.3945        |
| Free (Lys+Met+Thr+Ile)/Asp        | Free Asn                                             | -0.3199        | 0.3675        |
| <b>Free (Lys+Met+Thr+Ile)/Asp</b> | <b>Free Asn+Asp</b>                                  | <b>-0.4395</b> | <b>0.2038</b> |
| <b>Free (Lys+Met+Thr+Ile)/Asp</b> | <b>Free Asn+Asp+Lys+Met+Thr+Ile</b>                  | <b>0.6100</b>  | <b>0.0611</b> |
| <b>Free (Lys+Met+Thr+Ile)/Asp</b> | <b>Free Asn+Asp+Lys+Thr+Ile</b>                      | <b>0.6150</b>  | <b>0.0585</b> |
| <b>Free (Lys+Met+Thr+Ile)/Asp</b> | <b>Free Asp</b>                                      | <b>-0.4475</b> | <b>0.1947</b> |
| <b>Free (Lys+Met+Thr+Ile)/Asp</b> | <b>Free Asp+Lys+Met+Thr+Ile</b>                      | <b>0.6509</b>  | <b>0.0415</b> |
| <b>Free (Lys+Met+Thr+Ile)/Asp</b> | <b>Free Cys</b>                                      | <b>0.6880</b>  | <b>0.0279</b> |
| Free (Lys+Met+Thr+Ile)/Asp        | Free Gln                                             | -0.3576        | 0.3104        |
| Free (Lys+Met+Thr+Ile)/Asp        | Free Glu                                             | -0.2089        | 0.5625        |
| Free (Lys+Met+Thr+Ile)/Asp        | Free Gly                                             | -0.3191        | 0.3688        |
| Free (Lys+Met+Thr+Ile)/Asp        | Free Gly+Ile                                         | -0.2938        | 0.4100        |
| Free (Lys+Met+Thr+Ile)/Asp        | Free His                                             | -0.2828        | 0.4286        |
| Free (Lys+Met+Thr+Ile)/Asp        | Free Ile                                             | 0.3486         | 0.3236        |
| Free (Lys+Met+Thr+Ile)/Asp        | Free Leu                                             | -0.3788        | 0.2804        |
| Free (Lys+Met+Thr+Ile)/Asp        | Free Lys                                             | -0.3077        | 0.3871        |
| <b>Free (Lys+Met+Thr+Ile)/Asp</b> | <b>Free Lys+Met+Thr+Ile</b>                          | <b>0.8804</b>  | <b>0.0008</b> |
| Free (Lys+Met+Thr+Ile)/Asp        | Free Met                                             | -0.3399        | 0.3365        |
| <b>Free (Lys+Met+Thr+Ile)/Asp</b> | <b>Free Met+Thr+Ile</b>                              | <b>0.8905</b>  | <b>0.0006</b> |
| <b>Free (Lys+Met+Thr+Ile)/Asp</b> | <b>Free Phe</b>                                      | <b>-0.4830</b> | <b>0.1574</b> |

|                                   |                                                            |                |               |
|-----------------------------------|------------------------------------------------------------|----------------|---------------|
| <b>Free (Lys+Met+Thr+Ile)/Asp</b> | <b>Free Pro</b>                                            | <b>-0.4419</b> | <b>0.2011</b> |
| <b>Free (Lys+Met+Thr+Ile)/Asp</b> | <b>Free Ser</b>                                            | <b>-0.6346</b> | <b>0.0488</b> |
| <b>Free (Lys+Met+Thr+Ile)/Asp</b> | <b>Free Thr</b>                                            | <b>0.8937</b>  | <b>0.0005</b> |
| <b>Free (Lys+Met+Thr+Ile)/Asp</b> | <b>Free Trp</b>                                            | <b>-0.4668</b> | <b>0.1738</b> |
| <b>Free (Lys+Met+Thr+Ile)/Asp</b> | <b>Free Tyr</b>                                            | <b>-0.4007</b> | <b>0.2512</b> |
| <b>Free (Lys+Met+Thr+Ile)/Asp</b> | <b>Free Val</b>                                            | <b>-0.4174</b> | <b>0.2301</b> |
| Free (Lys+Met+Thr+Ile)/Asp        | HSDH activity with four effectors                          | -0.2975        | 0.4039        |
| Free (Lys+Met+Thr+Ile)/Asp        | HSDH activity without effectors                            | -0.0228        | 0.9502        |
| Free (Lys+Met+Thr+Ile)/Asp        | <i>LKR-SDHI</i>                                            | 0.3909         | 0.2640        |
| <b>Free (Lys+Met+Thr+Ile)/Asp</b> | <b>Lys-sensitive AK activity</b>                           | <b>0.7222</b>  | <b>0.0183</b> |
| <b>Free (Lys+Met+Thr+Ile)/Asp</b> | <b>Lys-sensitive AK activity/Thr-sensitive AK activity</b> | <b>0.5441</b>  | <b>0.1040</b> |
| <b>Free (Lys+Met+Thr+Ile)/Asp</b> | <b>SAMS1</b>                                               | <b>-0.4721</b> | <b>0.1683</b> |
| Free (Lys+Met+Thr+Ile)/Asp        | <i>SAMS2</i>                                               | 0.0745         | 0.8380        |
| Free (Lys+Met+Thr+Ile)/Asp        | <i>SAMS3</i>                                               | -0.0627        | 0.8634        |
| Free (Lys+Met+Thr+Ile)/Asp        | <i>SAMS4</i>                                               | -0.2648        | 0.4598        |
| Free (Lys+Met+Thr+Ile)/Asp        | <i>SAMSs</i>                                               | -0.2563        | 0.4747        |
| Free (Lys+Met+Thr+Ile)/Asp        | <i>TD1</i>                                                 | -0.1857        | 0.6074        |
| Free (Lys+Met+Thr+Ile)/Asp        | <i>TD1/BCAT1</i>                                           | -0.2174        | 0.5463        |
| Free (Lys+Met+Thr+Ile)/Asp        | <i>THA1</i>                                                | 0.0498         | 0.8914        |
| <b>Free (Lys+Met+Thr+Ile)/Asp</b> | <b>THA2</b>                                                | <b>0.5188</b>  | <b>0.1244</b> |
| <b>Free (Lys+Met+Thr+Ile)/Asp</b> | <b>THAs</b>                                                | <b>0.5592</b>  | <b>0.0929</b> |
| Free (Lys+Met+Thr+Ile)/Asp        | <i>THAs+TD1</i>                                            | -0.0678        | 0.8525        |
| Free (Lys+Met+Thr+Ile)/Asp        | Thr-sensitive AK activity                                  | -0.3947        | 0.2590        |
| Free (Lys+Met+Thr+Ile)/Asp        | Total free AAs                                             | -0.1756        | 0.6274        |
| Free (Lys+Met+Thr+Ile)/Asp        | <i>TS1</i>                                                 | 0.1148         | 0.7522        |
| Free (Lys+Met+Thr+Ile)/Asp        | <i>TS1/(THAs+TD1)</i>                                      | 0.1118         | 0.7585        |
| Free (Lys+Met+Thr+Ile)/Asp        | <i>TS1/TD1</i>                                             | 0.0085         | 0.9814        |
| Free (Lys+Met+Thr+Ile)/Asp        | <i>TS1/THAs</i>                                            | -0.3204        | 0.3668        |
| Free Ala                          | <i>(AK-HSDHs+CGS1)/SAMSs</i>                               | -0.2386        | 0.5068        |
| <b>Free Ala</b>                   | <b><i>(AK-HSDHs+TS1)/(THAs+TD1)</i></b>                    | <b>-0.6008</b> | <b>0.0662</b> |
| Free Ala                          | <i>(AK-HSDHs+TS1+TD1)/BCAT1</i>                            | 0.2799         | 0.4334        |
| Free Ala                          | <i>(AKs+AK-HSDHs)/AK-HSDHs</i>                             | -0.2701        | 0.4504        |
| Free Ala                          | <i>(AKs+AK-HSDHs+CGS1)/SAMSs</i>                           | -0.2771        | 0.4382        |
| Free Ala                          | <i>(AKs+AK-HSDHs+DHDPSs)/LKR-SDHI</i>                      | -0.0915        | 0.8015        |
| <b>Free Ala</b>                   | <b><i>(AKs+AK-HSDHs+TS1)/(THAs+TD1)</i></b>                | <b>-0.7341</b> | <b>0.0156</b> |
| Free Ala                          | <i>(AKs+AK-HSDHs+TS1+TD1)/BCAT1</i>                        | 0.2706         | 0.4495        |
| Free Ala                          | <i>(AKs+DHDPSs)/LKR-SDHI</i>                               | -0.1911        | 0.5969        |
| Free Ala                          | AK activity with four effectors                            | -0.2921        | 0.4129        |
| Free Ala                          | AK activity without effectors                              | -0.3393        | 0.3375        |
| Free Ala                          | AK activity/HSDH activity with four effectors              | -0.3786        | 0.2807        |
| Free Ala                          | AK activity/HSDH activity without effectors                | -0.2287        | 0.5251        |
| Free Ala                          | <i>AK1</i>                                                 | -0.3416        | 0.3341        |
| Free Ala                          | <i>AK1+AK2</i>                                             | -0.2211        | 0.5394        |
| Free Ala                          | <i>AK1+AK3</i>                                             | 0.0161         | 0.9648        |
| Free Ala                          | <i>AK2</i>                                                 | -0.1416        | 0.6965        |
| Free Ala                          | <i>AK2+AK3</i>                                             | -0.0661        | 0.8560        |
| <b>Free Ala</b>                   | <b>AK3</b>                                                 | <b>0.4188</b>  | <b>0.2284</b> |
| Free Ala                          | <i>AK-HSDH1</i>                                            | 0.0634         | 0.8618        |
| <b>Free Ala</b>                   | <b>AK-HSDH2</b>                                            | <b>0.5720</b>  | <b>0.0841</b> |
| <b>Free Ala</b>                   | <b>AK-HSDHs</b>                                            | <b>0.4083</b>  | <b>0.2414</b> |
| <b>Free Ala</b>                   | <b>AK-HSDHs+CGS1</b>                                       | <b>0.4769</b>  | <b>0.1634</b> |
| <b>Free Ala</b>                   | <b>AK-HSDHs+TS1</b>                                        | <b>0.5491</b>  | <b>0.1002</b> |
| <b>Free Ala</b>                   | <b>AK-HSDHs+TS1+TD1</b>                                    | <b>0.5995</b>  | <b>0.0670</b> |
| <b>Free Ala</b>                   | <b>AK-HSDHs+TS1+THAs</b>                                   | <b>0.5466</b>  | <b>0.1020</b> |
| Free Ala                          | <i>AKs</i>                                                 | -0.1419        | 0.6958        |
| Free Ala                          | <i>AKs/AK-HSDHs</i>                                        | -0.2701        | 0.4504        |
| Free Ala                          | <i>AKs+AK-HSDHs</i>                                        | -0.0389        | 0.9150        |



|                 |                                                     |                |                  |
|-----------------|-----------------------------------------------------|----------------|------------------|
| Free Ala        | <i>AKs+AK-HSDHs+CGS1</i>                            | 0.0675         | 0.8530           |
| Free Ala        | <i>AKs+AK-HSDHs+DHDPSs</i>                          | -0.0079        | 0.9827           |
| Free Ala        | <i>AKs+AK-HSDHs+TS1</i>                             | 0.2228         | 0.5361           |
| Free Ala        | <i>AKs+AK-HSDHs+TS1+TD1</i>                         | 0.2743         | 0.4431           |
| Free Ala        | <i>AKs+AK-HSDHs+TS1+THAs</i>                        | 0.2191         | 0.5430           |
| Free Ala        | <i>AKs+DHDPSs</i>                                   | -0.1094        | 0.7636           |
| <b>Free Ala</b> | <b><i>BCAT1</i></b>                                 | <b>-0.8230</b> | <b>0.0034</b>    |
| Free Ala        | Biosynthetic genes analyzed                         | 0.3023         | 0.3959           |
| <b>Free Ala</b> | <b>Catabolic genes analyzed</b>                     | <b>0.5594</b>  | <b>0.0927</b>    |
| <b>Free Ala</b> | <b><i>CGS1</i></b>                                  | <b>0.4607</b>  | <b>0.1803</b>    |
| Free Ala        | <i>CGS1/SAMSs</i>                                   | -0.2927        | 0.4118           |
| Free Ala        | <i>CGS1/TS1</i>                                     | -0.1827        | 0.6135           |
| <b>Free Ala</b> | <b><i>DHDPS1</i></b>                                | <b>0.5208</b>  | <b>0.1227</b>    |
| <b>Free Ala</b> | <b><i>DHDPS2</i></b>                                | <b>0.6954</b>  | <b>0.0256</b>    |
| <b>Free Ala</b> | <b><i>DHDPSs</i></b>                                | <b>0.7927</b>  | <b>0.0062</b>    |
| Free Ala        | <i>DHDPSs/AK-HSDHs</i>                              | -0.2009        | 0.5779           |
| <b>Free Ala</b> | <b><i>DHDPSs/LKR-SDHI</i></b>                       | <b>0.4482</b>  | <b>0.1940</b>    |
| Free Ala        | HSDH activity with four effectors                   | 0.3057         | 0.3904           |
| Free Ala        | HSDH activity without effectors                     | 0.0413         | 0.9098           |
| Free Ala        | <i>LKR-SDHI</i>                                     | -0.0421        | 0.9080           |
| <b>Free Ala</b> | <b>Lys-sensitive AK activity</b>                    | <b>-0.6662</b> | <b>0.0354</b>    |
| Free Ala        | Lys-sensitive AK activity/Thr-sensitive AK activity | -0.3442        | 0.3302           |
| <b>Free Ala</b> | <b><i>SAMS1</i></b>                                 | <b>0.9459</b>  | <b>&lt;.0001</b> |
| <b>Free Ala</b> | <b><i>SAMS2</i></b>                                 | <b>0.7999</b>  | <b>0.0055</b>    |
| Free Ala        | <i>SAMS3</i>                                        | 0.1221         | 0.7369           |
| <b>Free Ala</b> | <b><i>SAMS4</i></b>                                 | <b>0.6587</b>  | <b>0.0384</b>    |
| <b>Free Ala</b> | <b><i>SAMSs</i></b>                                 | <b>0.5576</b>  | <b>0.0940</b>    |
| <b>Free Ala</b> | <b><i>TD1</i></b>                                   | <b>0.9292</b>  | <b>0.0001</b>    |
| Free Ala        | <i>TD1/BCAT1</i>                                    | 0.3428         | 0.3323           |
| Free Ala        | <i>THA1</i>                                         | -0.1239        | 0.7331           |
| Free Ala        | <i>THA2</i>                                         | -0.0165        | 0.9639           |
| Free Ala        | <i>THAs</i>                                         | -0.0381        | 0.9168           |
| <b>Free Ala</b> | <b><i>THAs+TD1</i></b>                              | <b>0.8908</b>  | <b>0.0005</b>    |
| Free Ala        | Thr-sensitive AK activity                           | 0.2612         | 0.4660           |
| <b>Free Ala</b> | <b><i>TS1</i></b>                                   | <b>0.5372</b>  | <b>0.1093</b>    |
| <b>Free Ala</b> | <b><i>TS1/(THAs+TD1)</i></b>                        | <b>-0.7254</b> | <b>0.0176</b>    |
| <b>Free Ala</b> | <b><i>TS1/TD1</i></b>                               | <b>-0.7349</b> | <b>0.0155</b>    |
| <b>Free Ala</b> | <b><i>TS1/THAs</i></b>                              | <b>0.6195</b>  | <b>0.0561</b>    |
| Free Arg        | <i>(AK-HSDHs+CGS1)/SAMSs</i>                        | 0.0843         | 0.8169           |
| Free Arg        | <i>(AK-HSDHs+TS1)/(THAs+TD1)</i>                    | -0.1794        | 0.6200           |
| <b>Free Arg</b> | <b><i>(AK-HSDHs+TS1+TD1)/BCAT1</i></b>              | <b>0.6721</b>  | <b>0.0333</b>    |
| Free Arg        | <i>(AKs+AK-HSDHs)/AK-HSDHs</i>                      | -0.2553        | 0.4765           |
| Free Arg        | <i>(AKs+AK-HSDHs+CGS1)/SAMSs</i>                    | -0.0983        | 0.7871           |
| Free Arg        | <i>(AKs+AK-HSDHs+DHDPSs)/LKR-SDHI</i>               | 0.3034         | 0.3941           |
| Free Arg        | <i>(AKs+AK-HSDHs+TS1)/(THAs+TD1)</i>                | -0.2582        | 0.4714           |
| <b>Free Arg</b> | <b><i>(AKs+AK-HSDHs+TS1+TD1)/BCAT1</i></b>          | <b>0.6688</b>  | <b>0.0345</b>    |
| Free Arg        | <i>(AKs+DHDPSs)/LKR-SDHI</i>                        | 0.2261         | 0.5300           |
| Free Arg        | AK activity with four effectors                     | 0.2087         | 0.5628           |
| Free Arg        | AK activity without effectors                       | 0.0230         | 0.9498           |
| Free Arg        | AK activity/HSDH activity with four effectors       | -0.2225        | 0.5367           |
| Free Arg        | AK activity/HSDH activity without effectors         | -0.1733        | 0.6322           |
| Free Arg        | <i>AK1</i>                                          | 0.1345         | 0.7110           |
| Free Arg        | <i>AK1+AK2</i>                                      | 0.0647         | 0.8591           |
| Free Arg        | <i>AK1+AK3</i>                                      | 0.2156         | 0.5497           |
| Free Arg        | <i>AK2</i>                                          | 0.0350         | 0.9236           |
| Free Arg        | <i>AK2+AK3</i>                                      | 0.0544         | 0.8813           |
| Free Arg        | <i>AK3</i>                                          | 0.1175         | 0.7465           |

|                 |                                                     |                |               |
|-----------------|-----------------------------------------------------|----------------|---------------|
| Free Arg        | <i>AK-HSDH1</i>                                     | 0.1432         | 0.6932        |
| <b>Free Arg</b> | <b><i>AK-HSDH2</i></b>                              | <b>0.6775</b>  | <b>0.0314</b> |
| <b>Free Arg</b> | <b><i>AK-HSDHs</i></b>                              | <b>0.5250</b>  | <b>0.1192</b> |
| <b>Free Arg</b> | <b><i>AK-HSDHs+CGS1</i></b>                         | <b>0.6265</b>  | <b>0.0526</b> |
| <b>Free Arg</b> | <b><i>AK-HSDHs+TS1</i></b>                          | <b>0.5858</b>  | <b>0.0752</b> |
| <b>Free Arg</b> | <b><i>AK-HSDHs+TS1+TD1</i></b>                      | <b>0.6060</b>  | <b>0.0633</b> |
| <b>Free Arg</b> | <b><i>AK-HSDHs+TS1+THAs</i></b>                     | <b>0.5878</b>  | <b>0.0739</b> |
| Free Arg        | <i>AKs</i>                                          | 0.0854         | 0.8145        |
| Free Arg        | <i>AKs/AK-HSDHs</i>                                 | -0.2553        | 0.4765        |
| Free Arg        | <i>AKs+AK-HSDHs</i>                                 | 0.2275         | 0.5274        |
| Free Arg        | <i>AKs+AK-HSDHs+CGS1</i>                            | 0.3545         | 0.3149        |
| Free Arg        | <i>AKs+AK-HSDHs+DHDPSs</i>                          | 0.2508         | 0.4846        |
| <b>Free Arg</b> | <b><i>AKs+AK-HSDHs+TS1</i></b>                      | <b>0.4305</b>  | <b>0.2143</b> |
| <b>Free Arg</b> | <b><i>AKs+AK-HSDHs+TS1+TD1</i></b>                  | <b>0.4569</b>  | <b>0.1844</b> |
| <b>Free Arg</b> | <b><i>AKs+AK-HSDHs+TS1+THAs</i></b>                 | <b>0.4288</b>  | <b>0.2163</b> |
| Free Arg        | <i>AKs+DHDPSs</i>                                   | 0.1118         | 0.7585        |
| <b>Free Arg</b> | <b><i>BCAT1</i></b>                                 | <b>-0.6969</b> | <b>0.0251</b> |
| <b>Free Arg</b> | <b>Biosynthetic genes analyzed</b>                  | <b>0.5122</b>  | <b>0.1302</b> |
| <b>Free Arg</b> | <b>Catabolic genes analyzed</b>                     | <b>0.4800</b>  | <b>0.1603</b> |
| <b>Free Arg</b> | <b><i>CGS1</i></b>                                  | <b>0.6129</b>  | <b>0.0596</b> |
| Free Arg        | <i>CGS1/SAMSs</i>                                   | -0.1563        | 0.6662        |
| Free Arg        | <i>CGS1/TS1</i>                                     | -0.1217        | 0.7377        |
| <b>Free Arg</b> | <b><i>DHDPS1</i></b>                                | <b>0.4178</b>  | <b>0.2295</b> |
| <b>Free Arg</b> | <b><i>DHDPS2</i></b>                                | <b>0.6163</b>  | <b>0.0578</b> |
| <b>Free Arg</b> | <b><i>DHDPSs</i></b>                                | <b>0.6705</b>  | <b>0.0339</b> |
| Free Arg        | <i>DHDPSs/AK-HSDHs</i>                              | -0.3040        | 0.3931        |
| <b>Free Arg</b> | <b><i>DHDPSs/LKR-SDH1</i></b>                       | <b>0.5216</b>  | <b>0.1220</b> |
| <b>Free Arg</b> | <b>Free Ala</b>                                     | <b>0.5508</b>  | <b>0.0989</b> |
| <b>Free Arg</b> | <b>HSDH activity with four effectors</b>            | <b>0.7239</b>  | <b>0.0179</b> |
| <b>Free Arg</b> | <b>HSDH activity without effectors</b>              | <b>0.4088</b>  | <b>0.2408</b> |
| Free Arg        | <i>LKR-SDH1</i>                                     | -0.2806        | 0.4323        |
| Free Arg        | Lys-sensitive AK activity                           | -0.2795        | 0.4342        |
| Free Arg        | Lys-sensitive AK activity/Thr-sensitive AK activity | 0.1405         | 0.6987        |
| <b>Free Arg</b> | <b><i>SAMS1</i></b>                                 | <b>0.4617</b>  | <b>0.1792</b> |
| <b>Free Arg</b> | <b><i>SAMS2</i></b>                                 | <b>0.5620</b>  | <b>0.0909</b> |
| Free Arg        | <i>SAMS3</i>                                        | 0.3018         | 0.3968        |
| <b>Free Arg</b> | <b><i>SAMS4</i></b>                                 | <b>0.4869</b>  | <b>0.1535</b> |
| <b>Free Arg</b> | <b><i>SAMSs</i></b>                                 | <b>0.4803</b>  | <b>0.1601</b> |
| <b>Free Arg</b> | <b><i>TD1</i></b>                                   | <b>0.6289</b>  | <b>0.0515</b> |
| <b>Free Arg</b> | <b><i>TD1/BCAT1</i></b>                             | <b>0.7025</b>  | <b>0.0235</b> |
| <b>Free Arg</b> | <b><i>THA1</i></b>                                  | <b>-0.5257</b> | <b>0.1186</b> |
| Free Arg        | <i>THA2</i>                                         | 0.2249         | 0.5321        |
| Free Arg        | <i>THAs</i>                                         | 0.1847         | 0.6095        |
| <b>Free Arg</b> | <b><i>THAs+TD1</i></b>                              | <b>0.6452</b>  | <b>0.0439</b> |
| Free Arg        | Thr-sensitive AK activity                           | -0.1589        | 0.6611        |
| <b>Free Arg</b> | <b><i>TS1</i></b>                                   | <b>0.5353</b>  | <b>0.1108</b> |
| Free Arg        | <i>TS1/(THAs+TD1)</i>                               | -0.3530        | 0.3170        |
| Free Arg        | <i>TS1/TD1</i>                                      | -0.2878        | 0.4201        |
| <b>Free Arg</b> | <b><i>TS1/THAs</i></b>                              | <b>0.4445</b>  | <b>0.1980</b> |
| Free Asn        | <i>(AK-HSDHs+CGS1)/SAMSs</i>                        | -0.2965        | 0.4054        |
| <b>Free Asn</b> | <b><i>(AK-HSDHs+TS1)/(THAs+TD1)</i></b>             | <b>-0.5612</b> | <b>0.0914</b> |
| <b>Free Asn</b> | <b><i>(AK-HSDHs+TS1+TD1)/BCAT1</i></b>              | <b>0.4835</b>  | <b>0.1569</b> |
| Free Asn        | <i>(AKs+AK-HSDHs)/AK-HSDHs</i>                      | -0.1409        | 0.6979        |
| Free Asn        | <i>(AKs+AK-HSDHs+CGS1)/SAMSs</i>                    | -0.1369        | 0.7061        |
| Free Asn        | <i>(AKs+AK-HSDHs+DHDPSs)/LKR-SDH1</i>               | 0.0503         | 0.8903        |
| <b>Free Asn</b> | <b><i>(AKs+AK-HSDHs+TS1)/(THAs+TD1)</i></b>         | <b>-0.5875</b> | <b>0.0741</b> |
| <b>Free Asn</b> | <b><i>(AKs+AK-HSDHs+TS1+TD1)/BCAT1</i></b>          | <b>0.4858</b>  | <b>0.1546</b> |

|                 |                                                     |                |               |
|-----------------|-----------------------------------------------------|----------------|---------------|
| Free Asn        | (AKs+DHDPSs)/LKR-SDHI                               | -0.0061        | 0.9866        |
| Free Asn        | AK activity with four effectors                     | -0.0803        | 0.8255        |
| Free Asn        | AK activity without effectors                       | -0.2863        | 0.4225        |
| Free Asn        | AK activity/HSDH activity with four effectors       | -0.1788        | 0.6211        |
| Free Asn        | AK activity/HSDH activity without effectors         | -0.0784        | 0.8295        |
| Free Asn        | AK1                                                 | 0.0909         | 0.8027        |
| Free Asn        | AK1+AK2                                             | 0.0489         | 0.8933        |
| Free Asn        | AK1+AK3                                             | 0.3098         | 0.3837        |
| Free Asn        | AK2                                                 | 0.0290         | 0.9367        |
| Free Asn        | AK2+AK3                                             | 0.0777         | 0.8311        |
| Free Asn        | AK3                                                 | 0.2856         | 0.4238        |
| Free Asn        | AK-HSDH1                                            | -0.0950        | 0.7940        |
| <b>Free Asn</b> | <b>AK-HSDH2</b>                                     | <b>0.6691</b>  | <b>0.0344</b> |
| Free Asn        | AK-HSDHs                                            | 0.3836         | 0.2738        |
| <b>Free Asn</b> | <b>AK-HSDHs+CGS1</b>                                | <b>0.4402</b>  | <b>0.2030</b> |
| <b>Free Asn</b> | <b>AK-HSDHs+TS1</b>                                 | <b>0.4918</b>  | <b>0.1488</b> |
| <b>Free Asn</b> | <b>AK-HSDHs+TS1+TD1</b>                             | <b>0.5417</b>  | <b>0.1058</b> |
| <b>Free Asn</b> | <b>AK-HSDHs+TS1+THAs</b>                            | <b>0.4901</b>  | <b>0.1504</b> |
| Free Asn        | AKs                                                 | 0.1004         | 0.7826        |
| Free Asn        | AKs/AK-HSDHs                                        | -0.1409        | 0.6979        |
| Free Asn        | AKs+AK-HSDHs                                        | 0.2062         | 0.5676        |
| Free Asn        | AKs+AK-HSDHs+CGS1                                   | 0.2892         | 0.4178        |
| Free Asn        | AKs+AK-HSDHs+DHDPSs                                 | 0.2377         | 0.5083        |
| Free Asn        | AKs+AK-HSDHs+TS1                                    | 0.3846         | 0.2725        |
| <b>Free Asn</b> | <b>AKs+AK-HSDHs+TS1+TD1</b>                         | <b>0.4280</b>  | <b>0.2172</b> |
| Free Asn        | AKs+AK-HSDHs+TS1+THAs                               | 0.3810         | 0.2774        |
| Free Asn        | AKs+DHDPSs                                          | 0.1346         | 0.7107        |
| <b>Free Asn</b> | <b>BCAT1</b>                                        | <b>-0.9125</b> | <b>0.0002</b> |
| <b>Free Asn</b> | <b>Biosynthetic genes analyzed</b>                  | <b>0.4432</b>  | <b>0.1996</b> |
| <b>Free Asn</b> | <b>Catabolic genes analyzed</b>                     | <b>0.5460</b>  | <b>0.1025</b> |
| <b>Free Asn</b> | <b>CGS1</b>                                         | <b>0.4187</b>  | <b>0.2285</b> |
| Free Asn        | CGS1/SAMSs                                          | -0.3463        | 0.3270        |
| Free Asn        | CGS1/TS1                                            | -0.1598        | 0.6592        |
| <b>Free Asn</b> | <b>DHDPS1</b>                                       | <b>0.6074</b>  | <b>0.0625</b> |
| <b>Free Asn</b> | <b>DHDPS2</b>                                       | <b>0.7181</b>  | <b>0.0193</b> |
| <b>Free Asn</b> | <b>DHDPSs</b>                                       | <b>0.8690</b>  | <b>0.0011</b> |
| Free Asn        | DHDPSs/AK-HSDHs                                     | -0.1298        | 0.7207        |
| <b>Free Asn</b> | <b>DHDPSs/LKR-SDHI</b>                              | <b>0.4329</b>  | <b>0.2114</b> |
| <b>Free Asn</b> | <b>Free Ala</b>                                     | <b>0.8189</b>  | <b>0.0038</b> |
| <b>Free Asn</b> | <b>Free Arg</b>                                     | <b>0.8292</b>  | <b>0.0030</b> |
| Free Asn        | HSDH activity with four effectors                   | 0.3626         | 0.3032        |
| Free Asn        | HSDH activity without effectors                     | 0.0208         | 0.9546        |
| Free Asn        | LKR-SDHI                                            | -0.0764        | 0.8339        |
| <b>Free Asn</b> | <b>Lys-sensitive AK activity</b>                    | <b>-0.5284</b> | <b>0.1164</b> |
| Free Asn        | Lys-sensitive AK activity/Thr-sensitive AK activity | -0.0734        | 0.8402        |
| <b>Free Asn</b> | <b>SAMS1</b>                                        | <b>0.7876</b>  | <b>0.0068</b> |
| <b>Free Asn</b> | <b>SAMS2</b>                                        | <b>0.7706</b>  | <b>0.0091</b> |
| Free Asn        | SAMS3                                               | 0.2099         | 0.5605        |
| <b>Free Asn</b> | <b>SAMS4</b>                                        | <b>0.5548</b>  | <b>0.0960</b> |
| <b>Free Asn</b> | <b>SAMSs</b>                                        | <b>0.5454</b>  | <b>0.1030</b> |
| <b>Free Asn</b> | <b>TD1</b>                                          | <b>0.8725</b>  | <b>0.0010</b> |
| <b>Free Asn</b> | <b>TD1/BCAT1</b>                                    | <b>0.5425</b>  | <b>0.1052</b> |
| Free Asn        | THA1                                                | -0.3732        | 0.2881        |
| Free Asn        | THA2                                                | 0.0204         | 0.9554        |
| Free Asn        | THAs                                                | 0.0249         | 0.9456        |
| <b>Free Asn</b> | <b>THAs+TD1</b>                                     | <b>0.8435</b>  | <b>0.0022</b> |
| Free Asn        | Thr-sensitive AK activity                           | -0.1043        | 0.7742        |

|                     |                                               |                |                  |
|---------------------|-----------------------------------------------|----------------|------------------|
| <b>Free Asn</b>     | <i>TS1</i>                                    | <b>0.4737</b>  | <b>0.1667</b>    |
| <b>Free Asn</b>     | <i>TS1/(THAs+TD1)</i>                         | <b>-0.7191</b> | <b>0.0191</b>    |
| <b>Free Asn</b>     | <i>TS1/TD1</i>                                | <b>-0.6808</b> | <b>0.0302</b>    |
| <b>Free Asn</b>     | <i>TS1/THAs</i>                               | <b>0.5903</b>  | <b>0.0724</b>    |
| <b>Free Asn+Asp</b> | <i>(AK-HSDHs+CGS1)/SAMSs</i>                  | <b>-0.4226</b> | <b>0.2237</b>    |
| <b>Free Asn+Asp</b> | <i>(AK-HSDHs+TS1)/(THAs+TD1)</i>              | <b>-0.7038</b> | <b>0.0231</b>    |
| Free Asn+Asp        | <i>(AK-HSDHs+TS1+TD1)/BCAT1</i>               | 0.2996         | 0.4004           |
| Free Asn+Asp        | <i>(AKs+AK-HSDHs)/AK-HSDHs</i>                | -0.0735        | 0.8401           |
| Free Asn+Asp        | <i>(AKs+AK-HSDHs+CGS1)/SAMSs</i>              | -0.1940        | 0.5912           |
| Free Asn+Asp        | <i>(AKs+AK-HSDHs+DHDPSs)/LKR-SDHI</i>         | -0.2554        | 0.4763           |
| <b>Free Asn+Asp</b> | <i>(AKs+AK-HSDHs+TS1)/(THAs+TD1)</i>          | <b>-0.7384</b> | <b>0.0147</b>    |
| Free Asn+Asp        | <i>(AKs+AK-HSDHs+TS1+TD1)/BCAT1</i>           | 0.3024         | 0.3958           |
| Free Asn+Asp        | <i>(AKs+DHDPSs)/LKR-SDHI</i>                  | -0.2989        | 0.4015           |
| <b>Free Asn+Asp</b> | <b>AK activity with four effectors</b>        | <b>-0.4406</b> | <b>0.2025</b>    |
| <b>Free Asn+Asp</b> | <b>AK activity without effectors</b>          | <b>-0.6301</b> | <b>0.0509</b>    |
| Free Asn+Asp        | AK activity/HSDH activity with four effectors | -0.3064        | 0.3893           |
| Free Asn+Asp        | AK activity/HSDH activity without effectors   | -0.1617        | 0.6553           |
| Free Asn+Asp        | <i>AK1</i>                                    | 0.1112         | 0.7598           |
| Free Asn+Asp        | <i>AK1+AK2</i>                                | -0.1124        | 0.7573           |
| Free Asn+Asp        | <i>AK1+AK3</i>                                | 0.3351         | 0.3439           |
| Free Asn+Asp        | <i>AK2</i>                                    | -0.1308        | 0.7188           |
| Free Asn+Asp        | <i>AK2+AK3</i>                                | -0.0759        | 0.8349           |
| Free Asn+Asp        | <i>AK3</i>                                    | 0.2976         | 0.4036           |
| Free Asn+Asp        | <i>AK-HSDH1</i>                               | -0.3015        | 0.3972           |
| <b>Free Asn+Asp</b> | <b>AK-HSDH2</b>                               | <b>0.4857</b>  | <b>0.1547</b>    |
| Free Asn+Asp        | <i>AK-HSDHs</i>                               | 0.1468         | 0.6857           |
| Free Asn+Asp        | <i>AK-HSDHs+CGS1</i>                          | 0.1504         | 0.6783           |
| Free Asn+Asp        | <i>AK-HSDHs+TS1</i>                           | 0.1979         | 0.5836           |
| Free Asn+Asp        | <i>AK-HSDHs+TS1+TD1</i>                       | 0.2579         | 0.4719           |
| Free Asn+Asp        | <i>AK-HSDHs+TS1+THAs</i>                      | 0.1931         | 0.5930           |
| Free Asn+Asp        | <i>AKs</i>                                    | -0.0560        | 0.8779           |
| Free Asn+Asp        | <i>AKs/AK-HSDHs</i>                           | -0.0735        | 0.8401           |
| Free Asn+Asp        | <i>AKs+AK-HSDHs</i>                           | -0.0185        | 0.9595           |
| Free Asn+Asp        | <i>AKs+AK-HSDHs+CGS1</i>                      | 0.0103         | 0.9774           |
| Free Asn+Asp        | <i>AKs+AK-HSDHs+DHDPSs</i>                    | 0.0101         | 0.9779           |
| Free Asn+Asp        | <i>AKs+AK-HSDHs+TS1</i>                       | 0.0762         | 0.8343           |
| Free Asn+Asp        | <i>AKs+AK-HSDHs+TS1+TD1</i>                   | 0.1222         | 0.7367           |
| Free Asn+Asp        | <i>AKs+AK-HSDHs+TS1+THAs</i>                  | 0.0719         | 0.8434           |
| Free Asn+Asp        | <i>AKs+DHDPSs</i>                             | -0.0263        | 0.9424           |
| <b>Free Asn+Asp</b> | <b>BCAT1</b>                                  | <b>-0.9215</b> | <b>0.0002</b>    |
| Free Asn+Asp        | Biosynthetic genes analyzed                   | 0.1114         | 0.7594           |
| Free Asn+Asp        | Catabolic genes analyzed                      | 0.3853         | 0.2715           |
| Free Asn+Asp        | <i>CGS1</i>                                   | 0.1285         | 0.7235           |
| Free Asn+Asp        | <i>CGS1/SAMSs</i>                             | -0.3189        | 0.3691           |
| Free Asn+Asp        | <i>CGS1/TS1</i>                               | -0.0647        | 0.8591           |
| <b>Free Asn+Asp</b> | <b>DHDPS1</b>                                 | <b>0.5922</b>  | <b>0.0713</b>    |
| <b>Free Asn+Asp</b> | <b>DHDPS2</b>                                 | <b>0.5390</b>  | <b>0.1079</b>    |
| <b>Free Asn+Asp</b> | <b>DHDPSs</b>                                 | <b>0.7408</b>  | <b>0.0142</b>    |
| Free Asn+Asp        | <i>DHDPSs/AK-HSDHs</i>                        | 0.0742         | 0.8386           |
| Free Asn+Asp        | <i>DHDPSs/LKR-SDHI</i>                        | 0.2158         | 0.5493           |
| <b>Free Asn+Asp</b> | <b>Free Ala</b>                               | <b>0.8126</b>  | <b>0.0043</b>    |
| <b>Free Asn+Asp</b> | <b>Free Arg</b>                               | <b>0.5758</b>  | <b>0.0815</b>    |
| <b>Free Asn+Asp</b> | <b>Free Asn</b>                               | <b>0.9075</b>  | <b>0.0003</b>    |
| <b>Free Asn+Asp</b> | <b>Free Asp</b>                               | <b>0.9976</b>  | <b>&lt;.0001</b> |
| Free Asn+Asp        | Free Cys                                      | 0.2664         | 0.4568           |
| <b>Free Asn+Asp</b> | <b>Free Gln</b>                               | <b>0.9169</b>  | <b>0.0002</b>    |
| <b>Free Asn+Asp</b> | <b>Free Glu</b>                               | <b>0.8631</b>  | <b>0.0013</b>    |

|                                     |                                                     |                |                  |
|-------------------------------------|-----------------------------------------------------|----------------|------------------|
| <b>Free Asn+Asp</b>                 | <b>Free Gly</b>                                     | <b>0.8556</b>  | <b>0.0016</b>    |
| <b>Free Asn+Asp</b>                 | <b>Free His</b>                                     | <b>0.7471</b>  | <b>0.0130</b>    |
| Free Asn+Asp                        | Free Ile                                            | 0.2373         | 0.5092           |
| <b>Free Asn+Asp</b>                 | <b>Free Leu</b>                                     | <b>0.7640</b>  | <b>0.0101</b>    |
| <b>Free Asn+Asp</b>                 | <b>Free Lys</b>                                     | <b>0.7455</b>  | <b>0.0133</b>    |
| Free Asn+Asp                        | Free Lys+Met+Thr+Ile                                | -0.0641        | 0.8603           |
| <b>Free Asn+Asp</b>                 | <b>Free Met</b>                                     | <b>0.7433</b>  | <b>0.0138</b>    |
| <b>Free Asn+Asp</b>                 | <b>Free Phe</b>                                     | <b>0.7031</b>  | <b>0.0233</b>    |
| <b>Free Asn+Asp</b>                 | <b>Free Pro</b>                                     | <b>0.9479</b>  | <b>&lt;.0001</b> |
| <b>Free Asn+Asp</b>                 | <b>Free Ser</b>                                     | <b>0.6913</b>  | <b>0.0268</b>    |
| Free Asn+Asp                        | Free Thr                                            | -0.1046        | 0.7738           |
| <b>Free Asn+Asp</b>                 | <b>Free Trp</b>                                     | <b>0.6458</b>  | <b>0.0437</b>    |
| <b>Free Asn+Asp</b>                 | <b>Free Tyr</b>                                     | <b>0.4376</b>  | <b>0.2060</b>    |
| <b>Free Asn+Asp</b>                 | <b>Free Val</b>                                     | <b>0.5221</b>  | <b>0.1216</b>    |
| Free Asn+Asp                        | HSDH activity with four effectors                   | 0.0569         | 0.8759           |
| Free Asn+Asp                        | HSDH activity without effectors                     | -0.2327        | 0.5176           |
| Free Asn+Asp                        | <i>LKR-SDHI</i>                                     | 0.0996         | 0.7844           |
| <b>Free Asn+Asp</b>                 | <b>Lys-sensitive AK activity</b>                    | <b>-0.7498</b> | <b>0.0125</b>    |
| Free Asn+Asp                        | Lys-sensitive AK activity/Thr-sensitive AK activity | -0.2026        | 0.5746           |
| <b>Free Asn+Asp</b>                 | <b>SAMS1</b>                                        | <b>0.8654</b>  | <b>0.0012</b>    |
| <b>Free Asn+Asp</b>                 | <b>SAMS2</b>                                        | <b>0.6781</b>  | <b>0.0312</b>    |
| Free Asn+Asp                        | <i>SAMS3</i>                                        | -0.0008        | 0.9983           |
| Free Asn+Asp                        | <i>SAMS4</i>                                        | 0.3736         | 0.2876           |
| Free Asn+Asp                        | <i>SAMSs</i>                                        | 0.3858         | 0.2709           |
| <b>Free Asn+Asp</b>                 | <b>TD1</b>                                          | <b>0.7668</b>  | <b>0.0097</b>    |
| Free Asn+Asp                        | <i>TD1/BCAT1</i>                                    | 0.3633         | 0.3022           |
| Free Asn+Asp                        | <i>THA1</i>                                         | -0.1193        | 0.7428           |
| Free Asn+Asp                        | <i>THA2</i>                                         | -0.2035        | 0.5729           |
| Free Asn+Asp                        | <i>THAs</i>                                         | -0.1699        | 0.6389           |
| <b>Free Asn+Asp</b>                 | <b>THAs+TD1</b>                                     | <b>0.7010</b>  | <b>0.0239</b>    |
| Free Asn+Asp                        | Thr-sensitive AK activity                           | -0.0837        | 0.8182           |
| <b>Free Asn+Asp</b>                 | <b>Total free AAs</b>                               | <b>0.9386</b>  | <b>&lt;.0001</b> |
| Free Asn+Asp                        | <i>TS1</i>                                          | 0.1933         | 0.5925           |
| <b>Free Asn+Asp</b>                 | <b>TS1/(THAs+TD1)</b>                               | <b>-0.8048</b> | <b>0.0050</b>    |
| <b>Free Asn+Asp</b>                 | <b>TS1/TD1</b>                                      | <b>-0.7767</b> | <b>0.0082</b>    |
| <b>Free Asn+Asp</b>                 | <b>TS1/THAs</b>                                     | <b>0.5266</b>  | <b>0.1179</b>    |
| Free Asn+Asp+Lys+Met+Thr+Ile        | <i>(AK-HSDHs+CGS1)/SAMSs</i>                        | -0.2974        | 0.4039           |
| <b>Free Asn+Asp+Lys+Met+Thr+Ile</b> | <b><i>(AK-HSDHs+TS1)/(THAs+TD1)</i></b>             | <b>-0.5820</b> | <b>0.0775</b>    |
| Free Asn+Asp+Lys+Met+Thr+Ile        | <i>(AK-HSDHs+TS1+TD1)/BCAT1</i>                     | 0.0481         | 0.8950           |
| <b>Free Asn+Asp+Lys+Met+Thr+Ile</b> | <b><i>(AKs+AK-HSDHs)/AK-HSDHs</i></b>               | <b>0.5553</b>  | <b>0.0956</b>    |
| <b>Free Asn+Asp+Lys+Met+Thr+Ile</b> | <b><i>(AKs+AK-HSDHs+CGS1)/SAMSs</i></b>             | <b>0.4323</b>  | <b>0.2122</b>    |
| Free Asn+Asp+Lys+Met+Thr+Ile        | <i>(AKs+AK-HSDHs+DHDPSs)/LKR-SDHI</i>               | -0.3139        | 0.3772           |
| Free Asn+Asp+Lys+Met+Thr+Ile        | <i>(AKs+AK-HSDHs+TS1)/(THAs+TD1)</i>                | -0.3266        | 0.3570           |
| Free Asn+Asp+Lys+Met+Thr+Ile        | <i>(AKs+AK-HSDHs+TS1+TD1)/BCAT1</i>                 | 0.0681         | 0.8518           |
| Free Asn+Asp+Lys+Met+Thr+Ile        | <i>(AKs+DHDPSs)/LKR-SDHI</i>                        | -0.2033        | 0.5733           |
| Free Asn+Asp+Lys+Met+Thr+Ile        | AK activity with four effectors                     | 0.0265         | 0.9420           |
| Free Asn+Asp+Lys+Met+Thr+Ile        | AK activity without effectors                       | 0.0429         | 0.9064           |
| Free Asn+Asp+Lys+Met+Thr+Ile        | AK activity/HSDH activity with four effectors       | 0.2754         | 0.4413           |
| Free Asn+Asp+Lys+Met+Thr+Ile        | AK activity/HSDH activity without effectors         | 0.2761         | 0.4400           |
| Free Asn+Asp+Lys+Met+Thr+Ile        | <i>AK1</i>                                          | 0.0895         | 0.8059           |
| <b>Free Asn+Asp+Lys+Met+Thr+Ile</b> | <b>AK1+AK2</b>                                      | <b>0.5228</b>  | <b>0.1210</b>    |
| Free Asn+Asp+Lys+Met+Thr+Ile        | <i>AK1+AK3</i>                                      | 0.2037         | 0.5724           |
| <b>Free Asn+Asp+Lys+Met+Thr+Ile</b> | <b>AK2</b>                                          | <b>0.4850</b>  | <b>0.1554</b>    |
| <b>Free Asn+Asp+Lys+Met+Thr+Ile</b> | <b>AK2+AK3</b>                                      | <b>0.4969</b>  | <b>0.1440</b>    |
| Free Asn+Asp+Lys+Met+Thr+Ile        | <i>AK3</i>                                          | 0.1416         | 0.6964           |
| Free Asn+Asp+Lys+Met+Thr+Ile        | <i>AK-HSDH1</i>                                     | -0.3919        | 0.2627           |
| Free Asn+Asp+Lys+Met+Thr+Ile        | <i>AK-HSDH2</i>                                     | -0.1835        | 0.6119           |
| Free Asn+Asp+Lys+Met+Thr+Ile        | <i>AK-HSDHs</i>                                     | -0.3398        | 0.3367           |

|                                     |                                                            |                |               |
|-------------------------------------|------------------------------------------------------------|----------------|---------------|
| Free Asn+Asp+Lys+Met+Thr+Ile        | <i>AK-HSDHs+CGSI</i>                                       | -0.2980        | 0.4030        |
| Free Asn+Asp+Lys+Met+Thr+Ile        | <i>AK-HSDHs+TSI</i>                                        | 0.0892         | 0.8065        |
| Free Asn+Asp+Lys+Met+Thr+Ile        | <i>AK-HSDHs+TSI+TDI</i>                                    | 0.1262         | 0.7283        |
| Free Asn+Asp+Lys+Met+Thr+Ile        | <i>AK-HSDHs+TSI+THAs</i>                                   | 0.0984         | 0.7868        |
| <b>Free Asn+Asp+Lys+Met+Thr+Ile</b> | <b>AKs</b>                                                 | <b>0.5403</b>  | <b>0.1069</b> |
| <b>Free Asn+Asp+Lys+Met+Thr+Ile</b> | <b>AKs/AK-HSDHs</b>                                        | <b>0.5553</b>  | <b>0.0956</b> |
| <b>Free Asn+Asp+Lys+Met+Thr+Ile</b> | <b>AKs+AK-HSDHs</b>                                        | <b>0.4723</b>  | <b>0.1681</b> |
| <b>Free Asn+Asp+Lys+Met+Thr+Ile</b> | <b>AKs+AK-HSDHs+CGSI</b>                                   | <b>0.4023</b>  | <b>0.2491</b> |
| <b>Free Asn+Asp+Lys+Met+Thr+Ile</b> | <b>AKs+AK-HSDHs+DHDPSs</b>                                 | <b>0.4875</b>  | <b>0.1529</b> |
| <b>Free Asn+Asp+Lys+Met+Thr+Ile</b> | <b>AKs+AK-HSDHs+TSI</b>                                    | <b>0.4958</b>  | <b>0.1450</b> |
| <b>Free Asn+Asp+Lys+Met+Thr+Ile</b> | <b>AKs+AK-HSDHs+TSI+TDI</b>                                | <b>0.5080</b>  | <b>0.1338</b> |
| <b>Free Asn+Asp+Lys+Met+Thr+Ile</b> | <b>AKs+AK-HSDHs+TSI+THAs</b>                               | <b>0.4988</b>  | <b>0.1422</b> |
| <b>Free Asn+Asp+Lys+Met+Thr+Ile</b> | <b>AKs+DHDPSs</b>                                          | <b>0.5576</b>  | <b>0.0940</b> |
| <b>Free Asn+Asp+Lys+Met+Thr+Ile</b> | <b>BCATI</b>                                               | <b>-0.4386</b> | <b>0.2048</b> |
| <b>Free Asn+Asp+Lys+Met+Thr+Ile</b> | <b>Biosynthetic genes analyzed</b>                         | <b>0.4290</b>  | <b>0.2161</b> |
| Free Asn+Asp+Lys+Met+Thr+Ile        | Catabolic genes analyzed                                   | -0.0963        | 0.7912        |
| Free Asn+Asp+Lys+Met+Thr+Ile        | <i>CGSI</i>                                                | -0.1898        | 0.5995        |
| Free Asn+Asp+Lys+Met+Thr+Ile        | <i>CGSI/SAMSs</i>                                          | 0.0036         | 0.9921        |
| <b>Free Asn+Asp+Lys+Met+Thr+Ile</b> | <b>CGSI/TSI</b>                                            | <b>-0.4042</b> | <b>0.2467</b> |
| <b>Free Asn+Asp+Lys+Met+Thr+Ile</b> | <b>DHDPSI</b>                                              | <b>0.7878</b>  | <b>0.0068</b> |
| Free Asn+Asp+Lys+Met+Thr+Ile        | <i>DHDPS2</i>                                              | 0.0362         | 0.9210        |
| <b>Free Asn+Asp+Lys+Met+Thr+Ile</b> | <b>DHDPSs</b>                                              | <b>0.5129</b>  | <b>0.1295</b> |
| <b>Free Asn+Asp+Lys+Met+Thr+Ile</b> | <b>DHDPSs/AK-HSDHs</b>                                     | <b>0.5460</b>  | <b>0.1025</b> |
| Free Asn+Asp+Lys+Met+Thr+Ile        | <i>DHDPSs/LKR-SDHI</i>                                     | -0.3392        | 0.3377        |
| Free Asn+Asp+Lys+Met+Thr+Ile        | Free Ala                                                   | 0.2253         | 0.5314        |
| Free Asn+Asp+Lys+Met+Thr+Ile        | Free Arg                                                   | 0.2261         | 0.5299        |
| <b>Free Asn+Asp+Lys+Met+Thr+Ile</b> | <b>Free Asn</b>                                            | <b>0.4488</b>  | <b>0.1933</b> |
| Free Asn+Asp+Lys+Met+Thr+Ile        | Free Asn+Asp                                               | 0.3962         | 0.2570        |
| Free Asn+Asp+Lys+Met+Thr+Ile        | Free Asp                                                   | 0.3837         | 0.2736        |
| <b>Free Asn+Asp+Lys+Met+Thr+Ile</b> | <b>Free Cys</b>                                            | <b>0.9149</b>  | <b>0.0002</b> |
| Free Asn+Asp+Lys+Met+Thr+Ile        | Free Gln                                                   | 0.3774         | 0.2823        |
| <b>Free Asn+Asp+Lys+Met+Thr+Ile</b> | <b>Free Glu</b>                                            | <b>0.5920</b>  | <b>0.0714</b> |
| Free Asn+Asp+Lys+Met+Thr+Ile        | Free Gly                                                   | 0.3023         | 0.3960        |
| Free Asn+Asp+Lys+Met+Thr+Ile        | Free His                                                   | 0.3341         | 0.3454        |
| <b>Free Asn+Asp+Lys+Met+Thr+Ile</b> | <b>Free Ile</b>                                            | <b>0.5709</b>  | <b>0.0848</b> |
| Free Asn+Asp+Lys+Met+Thr+Ile        | Free Leu                                                   | 0.2423         | 0.5000        |
| Free Asn+Asp+Lys+Met+Thr+Ile        | Free Lys                                                   | 0.3236         | 0.3618        |
| <b>Free Asn+Asp+Lys+Met+Thr+Ile</b> | <b>Free Lys+Met+Thr+Ile</b>                                | <b>0.8908</b>  | <b>0.0005</b> |
| Free Asn+Asp+Lys+Met+Thr+Ile        | Free Met                                                   | 0.2274         | 0.5275        |
| Free Asn+Asp+Lys+Met+Thr+Ile        | Free Phe                                                   | 0.0867         | 0.8117        |
| Free Asn+Asp+Lys+Met+Thr+Ile        | Free Pro                                                   | 0.3371         | 0.3408        |
| Free Asn+Asp+Lys+Met+Thr+Ile        | Free Ser                                                   | -0.1217        | 0.7377        |
| <b>Free Asn+Asp+Lys+Met+Thr+Ile</b> | <b>Free Thr</b>                                            | <b>0.8708</b>  | <b>0.0010</b> |
| Free Asn+Asp+Lys+Met+Thr+Ile        | Free Trp                                                   | -0.0192        | 0.9581        |
| Free Asn+Asp+Lys+Met+Thr+Ile        | Free Tyr                                                   | -0.0530        | 0.8844        |
| Free Asn+Asp+Lys+Met+Thr+Ile        | Free Val                                                   | 0.0303         | 0.9337        |
| Free Asn+Asp+Lys+Met+Thr+Ile        | HSDH activity with four effectors                          | -0.2492        | 0.4875        |
| Free Asn+Asp+Lys+Met+Thr+Ile        | HSDH activity without effectors                            | -0.2625        | 0.4638        |
| <b>Free Asn+Asp+Lys+Met+Thr+Ile</b> | <b>LKR-SDHI</b>                                            | <b>0.6325</b>  | <b>0.0497</b> |
| Free Asn+Asp+Lys+Met+Thr+Ile        | Lys-sensitive AK activity                                  | 0.1292         | 0.7221        |
| <b>Free Asn+Asp+Lys+Met+Thr+Ile</b> | <b>Lys-sensitive AK activity/Thr-sensitive AK activity</b> | <b>0.4679</b>  | <b>0.1726</b> |
| Free Asn+Asp+Lys+Met+Thr+Ile        | <i>SAMS1</i>                                               | 0.2008         | 0.5781        |
| <b>Free Asn+Asp+Lys+Met+Thr+Ile</b> | <b>SAMS2</b>                                               | <b>0.6905</b>  | <b>0.0271</b> |
| Free Asn+Asp+Lys+Met+Thr+Ile        | <i>SAMS3</i>                                               | -0.2390        | 0.5061        |
| Free Asn+Asp+Lys+Met+Thr+Ile        | <i>SAMS4</i>                                               | -0.0873        | 0.8105        |
| Free Asn+Asp+Lys+Met+Thr+Ile        | <i>SAMSs</i>                                               | -0.1008        | 0.7817        |
| <b>Free Asn+Asp+Lys+Met+Thr+Ile</b> | <b>TDI</b>                                                 | <b>0.4139</b>  | <b>0.2344</b> |

|                                     |                                               |                |               |
|-------------------------------------|-----------------------------------------------|----------------|---------------|
| Free Asn+Asp+Lys+Met+Thr+Ile        | <i>TD1/BCAT1</i>                              | 0.0702         | 0.8472        |
| Free Asn+Asp+Lys+Met+Thr+Ile        | <i>THA1</i>                                   | 0.0903         | 0.8040        |
| <b>Free Asn+Asp+Lys+Met+Thr+Ile</b> | <b><i>THA2</i></b>                            | <b>0.4030</b>  | <b>0.2482</b> |
| <b>Free Asn+Asp+Lys+Met+Thr+Ile</b> | <b><i>THAs</i></b>                            | <b>0.4925</b>  | <b>0.1481</b> |
| <b>Free Asn+Asp+Lys+Met+Thr+Ile</b> | <b><i>THAs+TD1</i></b>                        | <b>0.4928</b>  | <b>0.1478</b> |
| <b>Free Asn+Asp+Lys+Met+Thr+Ile</b> | <b>Thr-sensitive AK activity</b>              | <b>-0.5445</b> | <b>0.1037</b> |
| <b>Free Asn+Asp+Lys+Met+Thr+Ile</b> | <b>Total free AAs</b>                         | <b>0.6296</b>  | <b>0.0511</b> |
| Free Asn+Asp+Lys+Met+Thr+Ile        | <i>TS1</i>                                    | 0.2668         | 0.4561        |
| <b>Free Asn+Asp+Lys+Met+Thr+Ile</b> | <b><i>TS1/(THAs+TD1)</i></b>                  | <b>-0.5388</b> | <b>0.1080</b> |
| <b>Free Asn+Asp+Lys+Met+Thr+Ile</b> | <b><i>TS1/TD1</i></b>                         | <b>-0.5866</b> | <b>0.0747</b> |
| Free Asn+Asp+Lys+Met+Thr+Ile        | <i>TS1/THAs</i>                               | 0.0283         | 0.9381        |
| Free Asn+Asp+Lys+Thr+Ile            | <i>(AK-HSDHs+CGS1)/SAMSs</i>                  | -0.2989        | 0.4015        |
| <b>Free Asn+Asp+Lys+Thr+Ile</b>     | <b><i>(AK-HSDHs+TS1)/(THAs+TD1)</i></b>       | <b>-0.5748</b> | <b>0.0822</b> |
| Free Asn+Asp+Lys+Thr+Ile            | <i>(AK-HSDHs+TS1+TD1)/BCAT1</i>               | 0.0420         | 0.9082        |
| <b>Free Asn+Asp+Lys+Thr+Ile</b>     | <b><i>(AKs+AK-HSDHs)/AK-HSDHs</i></b>         | <b>0.5566</b>  | <b>0.0947</b> |
| <b>Free Asn+Asp+Lys+Thr+Ile</b>     | <b><i>(AKs+AK-HSDHs+CGS1)/SAMSs</i></b>       | <b>0.4338</b>  | <b>0.2104</b> |
| Free Asn+Asp+Lys+Thr+Ile            | <i>(AKs+AK-HSDHs+DHDPSs)/LKR-SDHI</i>         | -0.3133        | 0.3781        |
| Free Asn+Asp+Lys+Thr+Ile            | <i>(AKs+AK-HSDHs+TS1)/(THAs+TD1)</i>          | -0.3190        | 0.3690        |
| Free Asn+Asp+Lys+Thr+Ile            | <i>(AKs+AK-HSDHs+TS1+TD1)/BCAT1</i>           | 0.0620         | 0.8648        |
| Free Asn+Asp+Lys+Thr+Ile            | <i>(AKs+DHDPSs)/LKR-SDHI</i>                  | -0.2024        | 0.5749        |
| Free Asn+Asp+Lys+Thr+Ile            | AK activity with four effectors               | 0.0278         | 0.9393        |
| Free Asn+Asp+Lys+Thr+Ile            | AK activity without effectors                 | 0.0448         | 0.9022        |
| Free Asn+Asp+Lys+Thr+Ile            | AK activity/HSDH activity with four effectors | 0.2778         | 0.4370        |
| Free Asn+Asp+Lys+Thr+Ile            | AK activity/HSDH activity without effectors   | 0.2770         | 0.4384        |
| Free Asn+Asp+Lys+Thr+Ile            | <i>AK1</i>                                    | 0.0954         | 0.7932        |
| <b>Free Asn+Asp+Lys+Thr+Ile</b>     | <b><i>AK1+AK2</i></b>                         | <b>0.5239</b>  | <b>0.1201</b> |
| Free Asn+Asp+Lys+Thr+Ile            | <i>AK1+AK3</i>                                | 0.2088         | 0.5627        |
| <b>Free Asn+Asp+Lys+Thr+Ile</b>     | <b><i>AK2</i></b>                             | <b>0.4848</b>  | <b>0.1556</b> |
| <b>Free Asn+Asp+Lys+Thr+Ile</b>     | <b><i>AK2+AK3</i></b>                         | <b>0.4966</b>  | <b>0.1442</b> |
| Free Asn+Asp+Lys+Thr+Ile            | <i>AK3</i>                                    | 0.1410         | 0.6976        |
| Free Asn+Asp+Lys+Thr+Ile            | <i>AK-HSDH1</i>                               | -0.3901        | 0.2652        |
| Free Asn+Asp+Lys+Thr+Ile            | <i>AK-HSDH2</i>                               | -0.1880        | 0.6029        |
| Free Asn+Asp+Lys+Thr+Ile            | <i>AK-HSDHs</i>                               | -0.3418        | 0.3337        |
| Free Asn+Asp+Lys+Thr+Ile            | <i>AK-HSDHs+CGS1</i>                          | -0.3032        | 0.3945        |
| Free Asn+Asp+Lys+Thr+Ile            | <i>AK-HSDHs+TS1</i>                           | 0.0855         | 0.8143        |
| Free Asn+Asp+Lys+Thr+Ile            | <i>AK-HSDHs+TS1+TD1</i>                       | 0.1221         | 0.7368        |
| Free Asn+Asp+Lys+Thr+Ile            | <i>AK-HSDHs+TS1+THAs</i>                      | 0.0947         | 0.7947        |
| <b>Free Asn+Asp+Lys+Thr+Ile</b>     | <b><i>AKs</i></b>                             | <b>0.5413</b>  | <b>0.1061</b> |
| <b>Free Asn+Asp+Lys+Thr+Ile</b>     | <b><i>AKs/AK-HSDHs</i></b>                    | <b>0.5566</b>  | <b>0.0947</b> |
| <b>Free Asn+Asp+Lys+Thr+Ile</b>     | <b><i>AKs+AK-HSDHs</i></b>                    | <b>0.4728</b>  | <b>0.1676</b> |
| <b>Free Asn+Asp+Lys+Thr+Ile</b>     | <b><i>AKs+AK-HSDHs+CGS1</i></b>               | <b>0.4011</b>  | <b>0.2507</b> |
| <b>Free Asn+Asp+Lys+Thr+Ile</b>     | <b><i>AKs+AK-HSDHs+DHDPSs</i></b>             | <b>0.4878</b>  | <b>0.1526</b> |
| <b>Free Asn+Asp+Lys+Thr+Ile</b>     | <b><i>AKs+AK-HSDHs+TS1</i></b>                | <b>0.4944</b>  | <b>0.1464</b> |
| <b>Free Asn+Asp+Lys+Thr+Ile</b>     | <b><i>AKs+AK-HSDHs+TS1+TD1</i></b>            | <b>0.5062</b>  | <b>0.1355</b> |
| <b>Free Asn+Asp+Lys+Thr+Ile</b>     | <b><i>AKs+AK-HSDHs+TS1+THAs</i></b>           | <b>0.4974</b>  | <b>0.1436</b> |
| <b>Free Asn+Asp+Lys+Thr+Ile</b>     | <b><i>AKs+DHDPSs</i></b>                      | <b>0.5584</b>  | <b>0.0934</b> |
| <b>Free Asn+Asp+Lys+Thr+Ile</b>     | <b><i>BCAT1</i></b>                           | <b>-0.4303</b> | <b>0.2145</b> |
| <b>Free Asn+Asp+Lys+Thr+Ile</b>     | <b>Biosynthetic genes analyzed</b>            | <b>0.4262</b>  | <b>0.2194</b> |
| Free Asn+Asp+Lys+Thr+Ile            | Catabolic genes analyzed                      | -0.1003        | 0.7829        |
| Free Asn+Asp+Lys+Thr+Ile            | <i>CGS1</i>                                   | -0.1974        | 0.5847        |
| Free Asn+Asp+Lys+Thr+Ile            | <i>CGS1/SAMSs</i>                             | 0.0021         | 0.9954        |
| <b>Free Asn+Asp+Lys+Thr+Ile</b>     | <b><i>CGS1/TS1</i></b>                        | <b>-0.4070</b> | <b>0.2431</b> |
| <b>Free Asn+Asp+Lys+Thr+Ile</b>     | <b><i>DHDPS1</i></b>                          | <b>0.7857</b>  | <b>0.0071</b> |
| Free Asn+Asp+Lys+Thr+Ile            | <i>DHDPS2</i>                                 | 0.0299         | 0.9346        |
| <b>Free Asn+Asp+Lys+Thr+Ile</b>     | <b><i>DHDPSs</i></b>                          | <b>0.5075</b>  | <b>0.1343</b> |
| <b>Free Asn+Asp+Lys+Thr+Ile</b>     | <b><i>DHDPSs/AK-HSDHs</i></b>                 | <b>0.5470</b>  | <b>0.1018</b> |
| Free Asn+Asp+Lys+Thr+Ile            | <i>DHDPSs/LKR-SDHI</i>                        | -0.3428        | 0.3322        |

|                                 |                                                            |                |                  |
|---------------------------------|------------------------------------------------------------|----------------|------------------|
| Free Asn+Asp+Lys+Thr+Ile        | Free Ala                                                   | 0.2168         | 0.5475           |
| Free Asn+Asp+Lys+Thr+Ile        | Free Arg                                                   | 0.2203         | 0.5408           |
| <b>Free Asn+Asp+Lys+Thr+Ile</b> | <b>Free Asn</b>                                            | <b>0.4418</b>  | <b>0.2011</b>    |
| Free Asn+Asp+Lys+Thr+Ile        | Free Asn+Asp                                               | 0.3896         | 0.2658           |
| <b>Free Asn+Asp+Lys+Thr+Ile</b> | <b>Free Asn+Asp+Lys+Met+Thr+Ile</b>                        | <b>0.9999</b>  | <b>&lt;.0001</b> |
| Free Asn+Asp+Lys+Thr+Ile        | Free Asp                                                   | 0.3773         | 0.2825           |
| <b>Free Asn+Asp+Lys+Thr+Ile</b> | <b>Free Cys</b>                                            | <b>0.9165</b>  | <b>0.0002</b>    |
| Free Asn+Asp+Lys+Thr+Ile        | Free Gln                                                   | 0.3708         | 0.2915           |
| <b>Free Asn+Asp+Lys+Thr+Ile</b> | <b>Free Glu</b>                                            | <b>0.5877</b>  | <b>0.0740</b>    |
| Free Asn+Asp+Lys+Thr+Ile        | Free Gly                                                   | 0.2982         | 0.4027           |
| Free Asn+Asp+Lys+Thr+Ile        | Free His                                                   | 0.3262         | 0.3576           |
| <b>Free Asn+Asp+Lys+Thr+Ile</b> | <b>Free Ile</b>                                            | <b>0.5655</b>  | <b>0.0885</b>    |
| Free Asn+Asp+Lys+Thr+Ile        | Free Leu                                                   | 0.2332         | 0.5168           |
| Free Asn+Asp+Lys+Thr+Ile        | Free Lys                                                   | 0.3143         | 0.3765           |
| <b>Free Asn+Asp+Lys+Thr+Ile</b> | <b>Free Lys+Met+Thr+Ile</b>                                | <b>0.8941</b>  | <b>0.0005</b>    |
| Free Asn+Asp+Lys+Thr+Ile        | Free Met                                                   | 0.2187         | 0.5438           |
| Free Asn+Asp+Lys+Thr+Ile        | Free Phe                                                   | 0.0777         | 0.8311           |
| Free Asn+Asp+Lys+Thr+Ile        | Free Pro                                                   | 0.3305         | 0.3510           |
| Free Asn+Asp+Lys+Thr+Ile        | Free Ser                                                   | -0.1251        | 0.7306           |
| <b>Free Asn+Asp+Lys+Thr+Ile</b> | <b>Free Thr</b>                                            | <b>0.8746</b>  | <b>0.0009</b>    |
| Free Asn+Asp+Lys+Thr+Ile        | Free Trp                                                   | -0.0272        | 0.9406           |
| Free Asn+Asp+Lys+Thr+Ile        | Free Tyr                                                   | -0.0629        | 0.8629           |
| Free Asn+Asp+Lys+Thr+Ile        | Free Val                                                   | 0.0229         | 0.9498           |
| Free Asn+Asp+Lys+Thr+Ile        | HSDH activity with four effectors                          | -0.2527        | 0.4811           |
| Free Asn+Asp+Lys+Thr+Ile        | HSDH activity without effectors                            | -0.2632        | 0.4625           |
| <b>Free Asn+Asp+Lys+Thr+Ile</b> | <b>LKR-SDHI</b>                                            | <b>0.6346</b>  | <b>0.0487</b>    |
| Free Asn+Asp+Lys+Thr+Ile        | Lys-sensitive AK activity                                  | 0.1343         | 0.7114           |
| <b>Free Asn+Asp+Lys+Thr+Ile</b> | <b>Lys-sensitive AK activity/Thr-sensitive AK activity</b> | <b>0.4691</b>  | <b>0.1714</b>    |
| Free Asn+Asp+Lys+Thr+Ile        | SAMS1                                                      | 0.1920         | 0.5952           |
| <b>Free Asn+Asp+Lys+Thr+Ile</b> | <b>SAMS2</b>                                               | <b>0.6850</b>  | <b>0.0288</b>    |
| Free Asn+Asp+Lys+Thr+Ile        | SAMS3                                                      | -0.2387        | 0.5066           |
| Free Asn+Asp+Lys+Thr+Ile        | SAMS4                                                      | -0.0923        | 0.7999           |
| Free Asn+Asp+Lys+Thr+Ile        | SAMSs                                                      | -0.1047        | 0.7734           |
| <b>Free Asn+Asp+Lys+Thr+Ile</b> | <b>TD1</b>                                                 | <b>0.4065</b>  | <b>0.2437</b>    |
| Free Asn+Asp+Lys+Thr+Ile        | TD1/BCAT1                                                  | 0.0637         | 0.8611           |
| Free Asn+Asp+Lys+Thr+Ile        | THA1                                                       | 0.0935         | 0.7972           |
| Free Asn+Asp+Lys+Thr+Ile        | THA2                                                       | 0.3995         | 0.2527           |
| <b>Free Asn+Asp+Lys+Thr+Ile</b> | <b>THAs</b>                                                | <b>0.4895</b>  | <b>0.1510</b>    |
| <b>Free Asn+Asp+Lys+Thr+Ile</b> | <b>THAs+TD1</b>                                            | <b>0.4851</b>  | <b>0.1553</b>    |
| <b>Free Asn+Asp+Lys+Thr+Ile</b> | <b>Thr-sensitive AK activity</b>                           | <b>-0.5457</b> | <b>0.1027</b>    |
| <b>Free Asn+Asp+Lys+Thr+Ile</b> | <b>Total free AAs</b>                                      | <b>0.6241</b>  | <b>0.0538</b>    |
| Free Asn+Asp+Lys+Thr+Ile        | TS1                                                        | 0.2629         | 0.4630           |
| <b>Free Asn+Asp+Lys+Thr+Ile</b> | <b>TS1/(THAs+TD1)</b>                                      | <b>-0.5312</b> | <b>0.1141</b>    |
| <b>Free Asn+Asp+Lys+Thr+Ile</b> | <b>TS1/TD1</b>                                             | <b>-0.5787</b> | <b>0.0796</b>    |
| Free Asn+Asp+Lys+Thr+Ile        | TS1/THAs                                                   | 0.0265         | 0.9421           |
| <b>Free Asp</b>                 | <b>(AK-HSDHs+CGS1)/SAMSs</b>                               | <b>-0.4380</b> | <b>0.2054</b>    |
| <b>Free Asp</b>                 | <b>(AK-HSDHs+TS1)/(THAs+TD1)</b>                           | <b>-0.7189</b> | <b>0.0191</b>    |
| Free Asp                        | (AK-HSDHs+TS1+TD1)/BCAT1                                   | 0.2599         | 0.4683           |
| Free Asp                        | (AKs+AK-HSDHs)/AK-HSDHs                                    | -0.0582        | 0.8730           |
| Free Asp                        | (AKs+AK-HSDHs+CGS1)/SAMSs                                  | -0.2004        | 0.5788           |
| Free Asp                        | (AKs+AK-HSDHs+DHDPSs)/LKR-SDHI                             | -0.3023        | 0.3959           |
| <b>Free Asp</b>                 | <b>(AKs+AK-HSDHs+TS1)/(THAs+TD1)</b>                       | <b>-0.7528</b> | <b>0.0120</b>    |
| Free Asp                        | (AKs+AK-HSDHs+TS1+TD1)/BCAT1                               | 0.2627         | 0.4634           |
| Free Asp                        | (AKs+DHDPSs)/LKR-SDHI                                      | -0.3430        | 0.3319           |
| <b>Free Asp</b>                 | <b>AK activity with four effectors</b>                     | <b>-0.4902</b> | <b>0.1504</b>    |
| <b>Free Asp</b>                 | <b>AK activity without effectors</b>                       | <b>-0.6725</b> | <b>0.0331</b>    |
| Free Asp                        | AK activity/HSDH activity with four effectors              | -0.3205        | 0.3665           |
| Free Asp                        | AK activity/HSDH activity without effectors                | -0.1713        | 0.6360           |



|                 |                                                     |                |               |
|-----------------|-----------------------------------------------------|----------------|---------------|
| Free Asp        | <i>AK1</i>                                          | 0.1128         | 0.7564        |
| Free Asp        | <i>AK1+AK2</i>                                      | -0.1378        | 0.7043        |
| Free Asp        | <i>AK1+AK3</i>                                      | 0.3353         | 0.3436        |
| Free Asp        | <i>AK2</i>                                          | -0.1556        | 0.6678        |
| Free Asp        | <i>AK2+AK3</i>                                      | -0.1003        | 0.7828        |
| Free Asp        | <i>AK3</i>                                          | 0.2965         | 0.4056        |
| Free Asp        | <i>AK-HSDH1</i>                                     | -0.3304        | 0.3511        |
| <b>Free Asp</b> | <b><i>AK-HSDH2</i></b>                              | <b>0.4452</b>  | <b>0.1972</b> |
| Free Asp        | <i>AK-HSDHs</i>                                     | 0.1040         | 0.7750        |
| Free Asp        | <i>AK-HSDHs+CGS1</i>                                | 0.1000         | 0.7835        |
| Free Asp        | <i>AK-HSDHs+TS1</i>                                 | 0.1425         | 0.6945        |
| Free Asp        | <i>AK-HSDHs+TS1+TD1</i>                             | 0.2034         | 0.5731        |
| Free Asp        | <i>AK-HSDHs+TS1+THAs</i>                            | 0.1373         | 0.7052        |
| Free Asp        | <i>AKs</i>                                          | -0.0812        | 0.8236        |
| Free Asp        | <i>AKs/AK-HSDHs</i>                                 | -0.0582        | 0.8730        |
| Free Asp        | <i>AKs+AK-HSDHs</i>                                 | -0.0559        | 0.8780        |
| Free Asp        | <i>AKs+AK-HSDHs+CGS1</i>                            | -0.0362        | 0.9208        |
| Free Asp        | <i>AKs+AK-HSDHs+DHDPSs</i>                          | -0.0284        | 0.9379        |
| Free Asp        | <i>AKs+AK-HSDHs+TS1</i>                             | 0.0215         | 0.9530        |
| Free Asp        | <i>AKs+AK-HSDHs+TS1+TD1</i>                         | 0.0672         | 0.8536        |
| Free Asp        | <i>AKs+AK-HSDHs+TS1+THAs</i>                        | 0.0173         | 0.9621        |
| Free Asp        | <i>AKs+DHDPSs</i>                                   | -0.0529        | 0.8845        |
| <b>Free Asp</b> | <b><i>BCAT1</i></b>                                 | <b>-0.9081</b> | <b>0.0003</b> |
| Free Asp        | Biosynthetic genes analyzed                         | 0.0526         | 0.8853        |
| Free Asp        | Catabolic genes analyzed                            | 0.3544         | 0.3150        |
| Free Asp        | <i>CGS1</i>                                         | 0.0795         | 0.8271        |
| Free Asp        | <i>CGS1/SAMSs</i>                                   | -0.3087        | 0.3855        |
| Free Asp        | <i>CGS1/TS1</i>                                     | -0.0417        | 0.9090        |
| <b>Free Asp</b> | <b><i>DHDPS1</i></b>                                | <b>0.5788</b>  | <b>0.0795</b> |
| <b>Free Asp</b> | <b><i>DHDPS2</i></b>                                | <b>0.4963</b>  | <b>0.1446</b> |
| <b>Free Asp</b> | <b><i>DHDPSs</i></b>                                | <b>0.7041</b>  | <b>0.0230</b> |
| Free Asp        | <i>DHDPSs/AK-HSDHs</i>                              | 0.1075         | 0.7675        |
| Free Asp        | <i>DHDPSs/LKR-SDH1</i>                              | 0.1750         | 0.6287        |
| <b>Free Asp</b> | <b>Free Ala</b>                                     | <b>0.7967</b>  | <b>0.0058</b> |
| <b>Free Asp</b> | <b>Free Arg</b>                                     | <b>0.5252</b>  | <b>0.1190</b> |
| <b>Free Asp</b> | <b>Free Asn</b>                                     | <b>0.8771</b>  | <b>0.0009</b> |
| Free Asp        | HSDH activity with four effectors                   | 0.0064         | 0.9859        |
| Free Asp        | HSDH activity without effectors                     | -0.2693        | 0.4518        |
| Free Asp        | <i>LKR-SDH1</i>                                     | 0.1261         | 0.7285        |
| <b>Free Asp</b> | <b>Lys-sensitive AK activity</b>                    | <b>-0.7734</b> | <b>0.0087</b> |
| Free Asp        | Lys-sensitive AK activity/Thr-sensitive AK activity | -0.2125        | 0.5556        |
| <b>Free Asp</b> | <b><i>SAMS1</i></b>                                 | <b>0.8645</b>  | <b>0.0012</b> |
| <b>Free Asp</b> | <b><i>SAMS2</i></b>                                 | <b>0.6511</b>  | <b>0.0414</b> |
| Free Asp        | <i>SAMS3</i>                                        | -0.0332        | 0.9275        |
| Free Asp        | <i>SAMS4</i>                                        | 0.3379         | 0.3396        |
| Free Asp        | <i>SAMSs</i>                                        | 0.3550         | 0.3141        |
| <b>Free Asp</b> | <b><i>TD1</i></b>                                   | <b>0.7361</b>  | <b>0.0152</b> |
| Free Asp        | <i>TD1/BCAT1</i>                                    | 0.3237         | 0.3616        |
| Free Asp        | <i>THA1</i>                                         | -0.0806        | 0.8248        |
| Free Asp        | <i>THA2</i>                                         | -0.2323        | 0.5184        |
| Free Asp        | <i>THAs</i>                                         | -0.1957        | 0.5880        |
| <b>Free Asp</b> | <b><i>THAs+TD1</i></b>                              | <b>0.6661</b>  | <b>0.0355</b> |
| Free Asp        | Thr-sensitive AK activity                           | -0.0877        | 0.8095        |
| Free Asp        | <i>TS1</i>                                          | 0.1396         | 0.7005        |
| <b>Free Asp</b> | <b><i>TS1/(THAs+TD1)</i></b>                        | <b>-0.8100</b> | <b>0.0045</b> |
| <b>Free Asp</b> | <b><i>TS1/TD1</i></b>                               | <b>-0.7810</b> | <b>0.0077</b> |
| <b>Free Asp</b> | <b><i>TS1/THAs</i></b>                              | <b>0.5073</b>  | <b>0.1345</b> |

|                                 |                                               |                |                  |
|---------------------------------|-----------------------------------------------|----------------|------------------|
| Free Asp+Lys+Met+Thr+Ile        | (AK-HSDHs+CGS1)/SAMs                          | -0.2873        | 0.4208           |
| <b>Free Asp+Lys+Met+Thr+Ile</b> | (AK-HSDHs+TS1)/(THAs+TD1)                     | <b>-0.5594</b> | <b>0.0927</b>    |
| Free Asp+Lys+Met+Thr+Ile        | (AK-HSDHs+TS1+TD1)/BCAT1                      | 0.0151         | 0.9670           |
| <b>Free Asp+Lys+Met+Thr+Ile</b> | (AKs+AK-HSDHs)/AK-HSDHs                       | <b>0.5789</b>  | <b>0.0795</b>    |
| <b>Free Asp+Lys+Met+Thr+Ile</b> | (AKs+AK-HSDHs+CGS1)/SAMs                      | <b>0.4514</b>  | <b>0.1903</b>    |
| Free Asp+Lys+Met+Thr+Ile        | (AKs+AK-HSDHs+DHDPSs)/LKR-SDHI                | -0.3286        | 0.3539           |
| Free Asp+Lys+Met+Thr+Ile        | (AKs+AK-HSDHs+TS1)/(THAs+TD1)                 | -0.2967        | 0.4052           |
| Free Asp+Lys+Met+Thr+Ile        | (AKs+AK-HSDHs+TS1+TD1)/BCAT1                  | 0.0353         | 0.9229           |
| Free Asp+Lys+Met+Thr+Ile        | (AKs+DHDPSs)/LKR-SDHI                         | -0.2117        | 0.5571           |
| Free Asp+Lys+Met+Thr+Ile        | AK activity with four effectors               | 0.0311         | 0.9320           |
| Free Asp+Lys+Met+Thr+Ile        | AK activity without effectors                 | 0.0635         | 0.8617           |
| Free Asp+Lys+Met+Thr+Ile        | AK activity/HSDH activity with four effectors | 0.2927         | 0.4118           |
| Free Asp+Lys+Met+Thr+Ile        | AK activity/HSDH activity without effectors   | 0.2855         | 0.4239           |
| Free Asp+Lys+Met+Thr+Ile        | AK1                                           | 0.0871         | 0.8109           |
| <b>Free Asp+Lys+Met+Thr+Ile</b> | <b>AK1+AK2</b>                                | <b>0.5313</b>  | <b>0.1140</b>    |
| Free Asp+Lys+Met+Thr+Ile        | AK1+AK3                                       | 0.1884         | 0.6022           |
| <b>Free Asp+Lys+Met+Thr+Ile</b> | <b>AK2</b>                                    | <b>0.4936</b>  | <b>0.1471</b>    |
| <b>Free Asp+Lys+Met+Thr+Ile</b> | <b>AK2+AK3</b>                                | <b>0.5023</b>  | <b>0.1390</b>    |
| Free Asp+Lys+Met+Thr+Ile        | AK3                                           | 0.1246         | 0.7316           |
| Free Asp+Lys+Met+Thr+Ile        | AK-HSDHI                                      | -0.3936        | 0.2604           |
| Free Asp+Lys+Met+Thr+Ile        | AK-HSDH2                                      | -0.2367        | 0.5103           |
| Free Asp+Lys+Met+Thr+Ile        | AK-HSDHs                                      | -0.3755        | 0.2849           |
| Free Asp+Lys+Met+Thr+Ile        | AK-HSDHs+CGS1                                 | -0.3372        | 0.3407           |
| Free Asp+Lys+Met+Thr+Ile        | AK-HSDHs+TS1                                  | 0.0579         | 0.8738           |
| Free Asp+Lys+Met+Thr+Ile        | AK-HSDHs+TS1+TD1                              | 0.0925         | 0.7993           |
| Free Asp+Lys+Met+Thr+Ile        | AK-HSDHs+TS1+THAs                             | 0.0675         | 0.8530           |
| <b>Free Asp+Lys+Met+Thr+Ile</b> | <b>AKs</b>                                    | <b>0.5456</b>  | <b>0.1028</b>    |
| <b>Free Asp+Lys+Met+Thr+Ile</b> | <b>AKs/AK-HSDHs</b>                           | <b>0.5789</b>  | <b>0.0795</b>    |
| <b>Free Asp+Lys+Met+Thr+Ile</b> | <b>AKs+AK-HSDHs</b>                           | <b>0.4684</b>  | <b>0.1722</b>    |
| Free Asp+Lys+Met+Thr+Ile        | AKs+AK-HSDHs+CGS1                             | 0.3905         | 0.2645           |
| <b>Free Asp+Lys+Met+Thr+Ile</b> | <b>AKs+AK-HSDHs+DHDPSs</b>                    | <b>0.4818</b>  | <b>0.1585</b>    |
| <b>Free Asp+Lys+Met+Thr+Ile</b> | <b>AKs+AK-HSDHs+TS1</b>                       | <b>0.4809</b>  | <b>0.1595</b>    |
| <b>Free Asp+Lys+Met+Thr+Ile</b> | <b>AKs+AK-HSDHs+TS1+TD1</b>                   | <b>0.4905</b>  | <b>0.1500</b>    |
| <b>Free Asp+Lys+Met+Thr+Ile</b> | <b>AKs+AK-HSDHs+TS1+THAs</b>                  | <b>0.4842</b>  | <b>0.1562</b>    |
| <b>Free Asp+Lys+Met+Thr+Ile</b> | <b>AKs+DHDPSs</b>                             | <b>0.5610</b>  | <b>0.0915</b>    |
| Free Asp+Lys+Met+Thr+Ile        | BCAT1                                         | -0.3872        | 0.2689           |
| <b>Free Asp+Lys+Met+Thr+Ile</b> | <b>Biosynthetic genes analyzed</b>            | <b>0.4081</b>  | <b>0.2417</b>    |
| Free Asp+Lys+Met+Thr+Ile        | Catabolic genes analyzed                      | -0.1358        | 0.7083           |
| Free Asp+Lys+Met+Thr+Ile        | CGS1                                          | -0.2253        | 0.5315           |
| Free Asp+Lys+Met+Thr+Ile        | CGS1/SAMs                                     | 0.0260         | 0.9431           |
| <b>Free Asp+Lys+Met+Thr+Ile</b> | <b>CGS1/TS1</b>                               | <b>-0.4065</b> | <b>0.2437</b>    |
| <b>Free Asp+Lys+Met+Thr+Ile</b> | <b>DHDPS1</b>                                 | <b>0.7702</b>  | <b>0.0091</b>    |
| Free Asp+Lys+Met+Thr+Ile        | DHDPS2                                        | -0.0140        | 0.9694           |
| <b>Free Asp+Lys+Met+Thr+Ile</b> | <b>DHDPSs</b>                                 | <b>0.4676</b>  | <b>0.1730</b>    |
| <b>Free Asp+Lys+Met+Thr+Ile</b> | <b>DHDPSs/AK-HSDHs</b>                        | <b>0.5700</b>  | <b>0.0854</b>    |
| Free Asp+Lys+Met+Thr+Ile        | DHDPSs/LKR-SDHI                               | -0.3788        | 0.2804           |
| Free Asp+Lys+Met+Thr+Ile        | Free Ala                                      | 0.1750         | 0.6287           |
| Free Asp+Lys+Met+Thr+Ile        | Free Arg                                      | 0.1746         | 0.6295           |
| Free Asp+Lys+Met+Thr+Ile        | Free Asn                                      | 0.3917         | 0.2630           |
| Free Asp+Lys+Met+Thr+Ile        | Free Asn+Asp                                  | 0.3441         | 0.3302           |
| <b>Free Asp+Lys+Met+Thr+Ile</b> | <b>Free Asn+Asp+Lys+Met+Thr+Ile</b>           | <b>0.9980</b>  | <b>&lt;.0001</b> |
| <b>Free Asp+Lys+Met+Thr+Ile</b> | <b>Free Asn+Asp+Lys+Thr+Ile</b>               | <b>0.9984</b>  | <b>&lt;.0001</b> |
| Free Asp+Lys+Met+Thr+Ile        | Free Asp                                      | 0.3335         | 0.3463           |
| <b>Free Asp+Lys+Met+Thr+Ile</b> | <b>Free Cys</b>                               | <b>0.9177</b>  | <b>0.0002</b>    |
| Free Asp+Lys+Met+Thr+Ile        | Free Gln                                      | 0.3206         | 0.3665           |
| <b>Free Asp+Lys+Met+Thr+Ile</b> | <b>Free Glu</b>                               | <b>0.5512</b>  | <b>0.0986</b>    |
| Free Asp+Lys+Met+Thr+Ile        | Free Gly                                      | 0.2575         | 0.4726           |

|                                 |                                                            |                |               |
|---------------------------------|------------------------------------------------------------|----------------|---------------|
| Free Asp+Lys+Met+Thr+Ile        | Free His                                                   | 0.2773         | 0.4379        |
| <b>Free Asp+Lys+Met+Thr+Ile</b> | <b>Free Ile</b>                                            | <b>0.5580</b>  | <b>0.0937</b> |
| Free Asp+Lys+Met+Thr+Ile        | Free Leu                                                   | 0.1871         | 0.6047        |
| Free Asp+Lys+Met+Thr+Ile        | Free Lys                                                   | 0.2705         | 0.4497        |
| <b>Free Asp+Lys+Met+Thr+Ile</b> | <b>Free Lys+Met+Thr+Ile</b>                                | <b>0.9145</b>  | <b>0.0002</b> |
| Free Asp+Lys+Met+Thr+Ile        | Free Met                                                   | 0.1842         | 0.6104        |
| Free Asp+Lys+Met+Thr+Ile        | Free Phe                                                   | 0.0313         | 0.9315        |
| Free Asp+Lys+Met+Thr+Ile        | Free Pro                                                   | 0.2805         | 0.4324        |
| Free Asp+Lys+Met+Thr+Ile        | Free Ser                                                   | -0.1643        | 0.6502        |
| <b>Free Asp+Lys+Met+Thr+Ile</b> | <b>Free Thr</b>                                            | <b>0.8973</b>  | <b>0.0004</b> |
| Free Asp+Lys+Met+Thr+Ile        | Free Trp                                                   | -0.0719        | 0.8434        |
| Free Asp+Lys+Met+Thr+Ile        | Free Tyr                                                   | -0.0952        | 0.7937        |
| Free Asp+Lys+Met+Thr+Ile        | Free Val                                                   | -0.0181        | 0.9605        |
| Free Asp+Lys+Met+Thr+Ile        | HSDH activity with four effectors                          | -0.2801        | 0.4331        |
| Free Asp+Lys+Met+Thr+Ile        | HSDH activity without effectors                            | -0.2683        | 0.4536        |
| <b>Free Asp+Lys+Met+Thr+Ile</b> | <b>LKR-SDHI</b>                                            | <b>0.6564</b>  | <b>0.0392</b> |
| Free Asp+Lys+Met+Thr+Ile        | Lys-sensitive AK activity                                  | 0.1681         | 0.6426        |
| <b>Free Asp+Lys+Met+Thr+Ile</b> | <b>Lys-sensitive AK activity/Thr-sensitive AK activity</b> | <b>0.4862</b>  | <b>0.1542</b> |
| Free Asp+Lys+Met+Thr+Ile        | SAMS1                                                      | 0.1520         | 0.6751        |
| <b>Free Asp+Lys+Met+Thr+Ile</b> | <b>SAMS2</b>                                               | <b>0.6575</b>  | <b>0.0388</b> |
| Free Asp+Lys+Met+Thr+Ile        | SAMS3                                                      | -0.2590        | 0.4699        |
| Free Asp+Lys+Met+Thr+Ile        | SAMS4                                                      | -0.1278        | 0.7251        |
| Free Asp+Lys+Met+Thr+Ile        | SAMSs                                                      | -0.1404        | 0.6989        |
| Free Asp+Lys+Met+Thr+Ile        | TD1                                                        | 0.3653         | 0.2993        |
| Free Asp+Lys+Met+Thr+Ile        | TD1/BCAT1                                                  | 0.0338         | 0.9261        |
| Free Asp+Lys+Met+Thr+Ile        | THA1                                                       | 0.1199         | 0.7414        |
| <b>Free Asp+Lys+Met+Thr+Ile</b> | <b>THA2</b>                                                | <b>0.4125</b>  | <b>0.2362</b> |
| <b>Free Asp+Lys+Met+Thr+Ile</b> | <b>THAs</b>                                                | <b>0.5038</b>  | <b>0.1376</b> |
| <b>Free Asp+Lys+Met+Thr+Ile</b> | <b>THAs+TD1</b>                                            | <b>0.4484</b>  | <b>0.1937</b> |
| <b>Free Asp+Lys+Met+Thr+Ile</b> | <b>Thr-sensitive AK activity</b>                           | <b>-0.5534</b> | <b>0.0971</b> |
| <b>Free Asp+Lys+Met+Thr+Ile</b> | <b>Total free AAs</b>                                      | <b>0.5814</b>  | <b>0.0779</b> |
| Free Asp+Lys+Met+Thr+Ile        | TS1                                                        | 0.2417         | 0.5011        |
| <b>Free Asp+Lys+Met+Thr+Ile</b> | <b>TS1/(THAs+TD1)</b>                                      | <b>-0.5041</b> | <b>0.1374</b> |
| <b>Free Asp+Lys+Met+Thr+Ile</b> | <b>TS1/TD1</b>                                             | <b>-0.5561</b> | <b>0.0951</b> |
| Free Asp+Lys+Met+Thr+Ile        | TS1/THAs                                                   | -0.0094        | 0.9795        |
| Free Cys                        | (AK-HSDHs+CGS1)/SAMSs                                      | -0.3715        | 0.2905        |
| <b>Free Cys</b>                 | <b>(AK-HSDHs+TS1)/(THAs+TD1)</b>                           | <b>-0.4118</b> | <b>0.2371</b> |
| Free Cys                        | (AK-HSDHs+TS1+TD1)/BCAT1                                   | 0.1772         | 0.6244        |
| <b>Free Cys</b>                 | <b>(AKs+AK-HSDHs)/AK-HSDHs</b>                             | <b>0.4512</b>  | <b>0.1906</b> |
| Free Cys                        | (AKs+AK-HSDHs+CGS1)/SAMSs                                  | 0.3603         | 0.3064        |
| Free Cys                        | (AKs+AK-HSDHs+DHDPSs)/LKR-SDHI                             | -0.1706        | 0.6374        |
| Free Cys                        | (AKs+AK-HSDHs+TS1)/(THAs+TD1)                              | -0.1681        | 0.6426        |
| Free Cys                        | (AKs+AK-HSDHs+TS1+TD1)/BCAT1                               | 0.1956         | 0.5882        |
| Free Cys                        | (AKs+DHDPSs)/LKR-SDHI                                      | -0.0634        | 0.8619        |
| Free Cys                        | AK activity with four effectors                            | 0.1777         | 0.6232        |
| Free Cys                        | AK activity without effectors                              | 0.1297         | 0.7210        |
| Free Cys                        | AK activity/HSDH activity with four effectors              | 0.3667         | 0.2973        |
| Free Cys                        | AK activity/HSDH activity without effectors                | 0.2602         | 0.4679        |
| Free Cys                        | AK1                                                        | 0.3526         | 0.3177        |
| <b>Free Cys</b>                 | <b>AK1+AK2</b>                                             | <b>0.5648</b>  | <b>0.0889</b> |
| Free Cys                        | AK1+AK3                                                    | 0.2034         | 0.5730        |
| <b>Free Cys</b>                 | <b>AK2</b>                                                 | <b>0.4710</b>  | <b>0.1694</b> |
| <b>Free Cys</b>                 | <b>AK2+AK3</b>                                             | <b>0.4306</b>  | <b>0.2142</b> |
| Free Cys                        | AK3                                                        | -0.1659        | 0.6469        |
| Free Cys                        | AK-HSDH1                                                   | -0.2979        | 0.4032        |
| Free Cys                        | AK-HSDH2                                                   | -0.1579        | 0.6630        |
| Free Cys                        | AK-HSDHs                                                   | -0.2691        | 0.4521        |

|                 |                                                            |                |               |
|-----------------|------------------------------------------------------------|----------------|---------------|
| Free Cys        | <i>AK-HSDHs+CGS1</i>                                       | -0.2617        | 0.4651        |
| Free Cys        | <i>AK-HSDHs+TS1</i>                                        | 0.0296         | 0.9354        |
| Free Cys        | <i>AK-HSDHs+TS1+TD1</i>                                    | 0.0553         | 0.8794        |
| Free Cys        | <i>AK-HSDHs+TS1+THAs</i>                                   | 0.0361         | 0.9212        |
| <b>Free Cys</b> | <b>AKs</b>                                                 | <b>0.5261</b>  | <b>0.1183</b> |
| <b>Free Cys</b> | <b>AKs/AK-HSDHs</b>                                        | <b>0.4512</b>  | <b>0.1906</b> |
| <b>Free Cys</b> | <b>AKs+AK-HSDHs</b>                                        | <b>0.4764</b>  | <b>0.1640</b> |
| <b>Free Cys</b> | <b>AKs+AK-HSDHs+CGS1</b>                                   | <b>0.4041</b>  | <b>0.2468</b> |
| <b>Free Cys</b> | <b>AKs+AK-HSDHs+DHDPSs</b>                                 | <b>0.4890</b>  | <b>0.1515</b> |
| <b>Free Cys</b> | <b>AKs+AK-HSDHs+TS1</b>                                    | <b>0.4473</b>  | <b>0.1949</b> |
| <b>Free Cys</b> | <b>AKs+AK-HSDHs+TS1+TD1</b>                                | <b>0.4513</b>  | <b>0.1904</b> |
| <b>Free Cys</b> | <b>AKs+AK-HSDHs+TS1+THAs</b>                               | <b>0.4495</b>  | <b>0.1925</b> |
| <b>Free Cys</b> | <b>AKs+DHDPSs</b>                                          | <b>0.5409</b>  | <b>0.1064</b> |
| Free Cys        | <i>BCAT1</i>                                               | -0.2943        | 0.4091        |
| Free Cys        | Biosynthetic genes analyzed                                | 0.3819         | 0.2761        |
| Free Cys        | Catabolic genes analyzed                                   | -0.0228        | 0.9502        |
| Free Cys        | <i>CGS1</i>                                                | -0.1975        | 0.5845        |
| Free Cys        | <i>CGS1/SAMSs</i>                                          | -0.1226        | 0.7357        |
| Free Cys        | <i>CGS1/TS1</i>                                            | -0.3329        | 0.3472        |
| <b>Free Cys</b> | <b>DHDPS1</b>                                              | <b>0.6730</b>  | <b>0.0329</b> |
| Free Cys        | <i>DHDPS2</i>                                              | 0.0254         | 0.9444        |
| <b>Free Cys</b> | <b>DHDPSs</b>                                              | <b>0.4412</b>  | <b>0.2018</b> |
| Free Cys        | <i>DHDPSs/AK-HSDHs</i>                                     | 0.3939         | 0.2600        |
| Free Cys        | <i>DHDPSs/LKR-SDHI</i>                                     | -0.2429        | 0.4989        |
| Free Cys        | Free Ala                                                   | 0.0143         | 0.9688        |
| Free Cys        | Free Arg                                                   | 0.1992         | 0.5812        |
| Free Cys        | Free Asn                                                   | 0.3515         | 0.3193        |
| Free Cys        | Free Asp                                                   | 0.2516         | 0.4831        |
| Free Cys        | HSDH activity with four effectors                          | -0.1568        | 0.6654        |
| Free Cys        | HSDH activity without effectors                            | -0.1232        | 0.7345        |
| <b>Free Cys</b> | <b>LKR-SDHI</b>                                            | <b>0.4417</b>  | <b>0.2012</b> |
| Free Cys        | Lys-sensitive AK activity                                  | 0.2513         | 0.4837        |
| <b>Free Cys</b> | <b>Lys-sensitive AK activity/Thr-sensitive AK activity</b> | <b>0.4067</b>  | <b>0.2435</b> |
| Free Cys        | <i>SAMS1</i>                                               | -0.0020        | 0.9955        |
| <b>Free Cys</b> | <b>SAMS2</b>                                               | <b>0.4618</b>  | <b>0.1791</b> |
| Free Cys        | <i>SAMS3</i>                                               | -0.0225        | 0.9508        |
| Free Cys        | <i>SAMS4</i>                                               | -0.1069        | 0.7688        |
| Free Cys        | <i>SAMSs</i>                                               | -0.0256        | 0.9439        |
| Free Cys        | <i>TD1</i>                                                 | 0.2602         | 0.4678        |
| Free Cys        | <i>TD1/BCAT1</i>                                           | 0.1922         | 0.5948        |
| Free Cys        | <i>THA1</i>                                                | -0.0341        | 0.9255        |
| Free Cys        | <i>THA2</i>                                                | 0.2951         | 0.4077        |
| Free Cys        | <i>THAs</i>                                                | 0.3639         | 0.3012        |
| Free Cys        | <i>THAs+TD1</i>                                            | 0.3193         | 0.3685        |
| <b>Free Cys</b> | <b>Thr-sensitive AK activity</b>                           | <b>-0.6347</b> | <b>0.0487</b> |
| Free Cys        | <i>TS1</i>                                                 | 0.1577         | 0.6635        |
| Free Cys        | <i>TS1/(THAs+TD1)</i>                                      | -0.3872        | 0.2689        |
| <b>Free Cys</b> | <b>TS1/TD1</b>                                             | <b>-0.4332</b> | <b>0.2111</b> |
| Free Cys        | <i>TS1/THAs</i>                                            | 0.0679         | 0.8522        |
| <b>Free Gln</b> | <b>(AK-HSDHs+CGS1)/SAMSs</b>                               | <b>-0.4206</b> | <b>0.2262</b> |
| <b>Free Gln</b> | <b>(AK-HSDHs+TS1)/(THAs+TD1)</b>                           | <b>-0.5623</b> | <b>0.0907</b> |
| <b>Free Gln</b> | <b>(AK-HSDHs+TS1+TD1)/BCAT1</b>                            | <b>0.4117</b>  | <b>0.2371</b> |
| Free Gln        | <i>(AKs+AK-HSDHs)/AK-HSDHs</i>                             | -0.2184        | 0.5444        |
| Free Gln        | <i>(AKs+AK-HSDHs+CGS1)/SAMSs</i>                           | -0.2688        | 0.4527        |
| Free Gln        | <i>(AKs+AK-HSDHs+DHDPSs)/LKR-SDHI</i>                      | 0.0384         | 0.9161        |
| <b>Free Gln</b> | <b>(AKs+AK-HSDHs+TS1)/(THAs+TD1)</b>                       | <b>-0.6255</b> | <b>0.0531</b> |
| <b>Free Gln</b> | <b>(AKs+AK-HSDHs+TS1+TD1)/BCAT1</b>                        | <b>0.4103</b>  | <b>0.2389</b> |

|                 |                                                     |                |                  |
|-----------------|-----------------------------------------------------|----------------|------------------|
| Free Gln        | (AKs+DHDPSs)/LKR-SDHI                               | -0.0395        | 0.9136           |
| Free Gln        | AK activity with four effectors                     | -0.1196        | 0.7422           |
| Free Gln        | AK activity without effectors                       | -0.3365        | 0.3417           |
| Free Gln        | AK activity/HSDH activity with four effectors       | -0.1974        | 0.5847           |
| Free Gln        | AK activity/HSDH activity without effectors         | -0.1193        | 0.7426           |
| Free Gln        | AK1                                                 | 0.1688         | 0.6410           |
| Free Gln        | AK1+AK2                                             | -0.0650        | 0.8585           |
| Free Gln        | AK1+AK3                                             | 0.3581         | 0.3096           |
| Free Gln        | AK2                                                 | -0.0967        | 0.7904           |
| Free Gln        | AK2+AK3                                             | -0.0497        | 0.8915           |
| Free Gln        | AK3                                                 | 0.2563         | 0.4748           |
| Free Gln        | AK-HSDHI                                            | -0.0563        | 0.8772           |
| <b>Free Gln</b> | <b>AK-HSDH2</b>                                     | <b>0.6857</b>  | <b>0.0286</b>    |
| <b>Free Gln</b> | <b>AK-HSDHs</b>                                     | <b>0.4156</b>  | <b>0.2323</b>    |
| <b>Free Gln</b> | <b>AK-HSDHs+CGSI</b>                                | <b>0.4478</b>  | <b>0.1944</b>    |
| <b>Free Gln</b> | <b>AK-HSDHs+TSI</b>                                 | <b>0.4200</b>  | <b>0.2269</b>    |
| <b>Free Gln</b> | <b>AK-HSDHs+TSI+TDI</b>                             | <b>0.4720</b>  | <b>0.1685</b>    |
| <b>Free Gln</b> | <b>AK-HSDHs+TSI+THAs</b>                            | <b>0.4156</b>  | <b>0.2323</b>    |
| Free Gln        | AKs                                                 | -0.0168        | 0.9634           |
| Free Gln        | AKs/AK-HSDHs                                        | -0.2184        | 0.5444           |
| Free Gln        | AKs+AK-HSDHs                                        | 0.0934         | 0.7974           |
| Free Gln        | AKs+AK-HSDHs+CGSI                                   | 0.1773         | 0.6241           |
| Free Gln        | AKs+AK-HSDHs+DHDPSs                                 | 0.1239         | 0.7330           |
| Free Gln        | AKs+AK-HSDHs+TSI                                    | 0.2447         | 0.4957           |
| Free Gln        | AKs+AK-HSDHs+TSI+TDI                                | 0.2908         | 0.4151           |
| Free Gln        | AKs+AK-HSDHs+TSI+THAs                               | 0.2405         | 0.5032           |
| Free Gln        | AKs+DHDPSs                                          | 0.0160         | 0.9651           |
| <b>Free Gln</b> | <b>BCATI</b>                                        | <b>-0.8826</b> | <b>0.0007</b>    |
| Free Gln        | Biosynthetic genes analyzed                         | 0.3116         | 0.3807           |
| <b>Free Gln</b> | <b>Catabolic genes analyzed</b>                     | <b>0.6348</b>  | <b>0.0487</b>    |
| Free Gln        | CGSI                                                | 0.3977         | 0.2551           |
| <b>Free Gln</b> | <b>CGSI/SAMs</b>                                    | <b>-0.4554</b> | <b>0.1859</b>    |
| Free Gln        | CGSI/TSI                                            | -0.0651        | 0.8583           |
| <b>Free Gln</b> | <b>DHDPS1</b>                                       | <b>0.5292</b>  | <b>0.1157</b>    |
| <b>Free Gln</b> | <b>DHDPS2</b>                                       | <b>0.7040</b>  | <b>0.0231</b>    |
| <b>Free Gln</b> | <b>DHDPSs</b>                                       | <b>0.8178</b>  | <b>0.0038</b>    |
| Free Gln        | DHDPSs/AK-HSDHs                                     | -0.1964        | 0.5865           |
| <b>Free Gln</b> | <b>DHDPSs/LKR-SDHI</b>                              | <b>0.4811</b>  | <b>0.1592</b>    |
| <b>Free Gln</b> | <b>Free Ala</b>                                     | <b>0.8007</b>  | <b>0.0054</b>    |
| <b>Free Gln</b> | <b>Free Arg</b>                                     | <b>0.7751</b>  | <b>0.0084</b>    |
| <b>Free Gln</b> | <b>Free Asn</b>                                     | <b>0.9756</b>  | <b>&lt;.0001</b> |
| <b>Free Gln</b> | <b>Free Asp</b>                                     | <b>0.8937</b>  | <b>0.0005</b>    |
| Free Gln        | Free Cys                                            | 0.3218         | 0.3646           |
| Free Gln        | HSDH activity with four effectors                   | 0.3454         | 0.3283           |
| Free Gln        | HSDH activity without effectors                     | 0.0226         | 0.9505           |
| Free Gln        | LKR-SDHI                                            | -0.1710        | 0.6367           |
| <b>Free Gln</b> | <b>Lys-sensitive AK activity</b>                    | <b>-0.6081</b> | <b>0.0622</b>    |
| Free Gln        | Lys-sensitive AK activity/Thr-sensitive AK activity | -0.1315        | 0.7172           |
| <b>Free Gln</b> | <b>SAMS1</b>                                        | <b>0.8142</b>  | <b>0.0041</b>    |
| <b>Free Gln</b> | <b>SAMS2</b>                                        | <b>0.6834</b>  | <b>0.0294</b>    |
| Free Gln        | SAMS3                                               | 0.3135         | 0.3778           |
| <b>Free Gln</b> | <b>SAMS4</b>                                        | <b>0.6006</b>  | <b>0.0663</b>    |
| <b>Free Gln</b> | <b>SAMs</b>                                         | <b>0.6351</b>  | <b>0.0485</b>    |
| <b>Free Gln</b> | <b>TDI</b>                                          | <b>0.8474</b>  | <b>0.0020</b>    |
| <b>Free Gln</b> | <b>TDI/BCATI</b>                                    | <b>0.4784</b>  | <b>0.1619</b>    |
| <b>Free Gln</b> | <b>THA1</b>                                         | <b>-0.4375</b> | <b>0.2061</b>    |
| Free Gln        | THA2                                                | -0.0903        | 0.8040           |

|                 |                                               |                |               |
|-----------------|-----------------------------------------------|----------------|---------------|
| Free Gln        | <i>THAs</i>                                   | -0.1041        | 0.7748        |
| <b>Free Gln</b> | <b><i>THAs+TDI</i></b>                        | <b>0.7940</b>  | <b>0.0061</b> |
| Free Gln        | Thr-sensitive AK activity                     | -0.1123        | 0.7574        |
| Free Gln        | <i>TSI</i>                                    | 0.3646         | 0.3003        |
| <b>Free Gln</b> | <b><i>TSI/(THAs+TDI)</i></b>                  | <b>-0.7398</b> | <b>0.0144</b> |
| <b>Free Gln</b> | <b><i>TSI/TDI</i></b>                         | <b>-0.6745</b> | <b>0.0324</b> |
| <b>Free Gln</b> | <b><i>TSI/THAs</i></b>                        | <b>0.6663</b>  | <b>0.0354</b> |
| Free Glu        | <i>(AK-HSDHs+CGS1)/SAMs</i>                   | -0.2642        | 0.4608        |
| <b>Free Glu</b> | <b><i>(AK-HSDHs+TSI)/(THAs+TDI)</i></b>       | <b>-0.6643</b> | <b>0.0362</b> |
| Free Glu        | <i>(AK-HSDHs+TSI+TDI)/BCAT1</i>               | 0.1743         | 0.6300        |
| Free Glu        | <i>(AKs+AK-HSDHs)/AK-HSDHs</i>                | 0.3404         | 0.3358        |
| Free Glu        | <i>(AKs+AK-HSDHs+CGS1)/SAMs</i>               | 0.2483         | 0.4892        |
| Free Glu        | <i>(AKs+AK-HSDHs+DHDPSs)/LKR-SDHI</i>         | -0.1521        | 0.6749        |
| <b>Free Glu</b> | <b><i>(AKs+AK-HSDHs+TSI)/(THAs+TDI)</i></b>   | <b>-0.4499</b> | <b>0.1921</b> |
| Free Glu        | <i>(AKs+AK-HSDHs+TSI+TDI)/BCAT1</i>           | 0.1983         | 0.5830        |
| Free Glu        | <i>(AKs+DHDPSs)/LKR-SDHI</i>                  | -0.0879        | 0.8092        |
| Free Glu        | AK activity with four effectors               | -0.2368        | 0.5101        |
| <b>Free Glu</b> | <b>AK activity without effectors</b>          | <b>-0.4606</b> | <b>0.1803</b> |
| Free Glu        | AK activity/HSDH activity with four effectors | 0.0607         | 0.8676        |
| Free Glu        | AK activity/HSDH activity without effectors   | 0.2534         | 0.4800        |
| Free Glu        | <i>AK1</i>                                    | 0.1081         | 0.7663        |
| Free Glu        | <i>AK1+AK2</i>                                | 0.3141         | 0.3768        |
| <b>Free Glu</b> | <b><i>AK1+AK3</i></b>                         | <b>0.4427</b>  | <b>0.2001</b> |
| Free Glu        | <i>AK2</i>                                    | 0.2807         | 0.4320        |
| Free Glu        | <i>AK2+AK3</i>                                | 0.3486         | 0.3235        |
| <b>Free Glu</b> | <b><i>AK3</i></b>                             | <b>0.4340</b>  | <b>0.2101</b> |
| <b>Free Glu</b> | <b><i>AK-HSDHI</i></b>                        | <b>-0.5899</b> | <b>0.0727</b> |
| Free Glu        | <i>AK-HSDH2</i>                               | 0.3542         | 0.3153        |
| Free Glu        | <i>AK-HSDHs</i>                               | -0.1018        | 0.7796        |
| Free Glu        | <i>AK-HSDHs+CGS1</i>                          | -0.0887        | 0.8074        |
| Free Glu        | <i>AK-HSDHs+TSI</i>                           | 0.0386         | 0.9158        |
| Free Glu        | <i>AK-HSDHs+TSI+TDI</i>                       | 0.0933         | 0.7976        |
| Free Glu        | <i>AK-HSDHs+TSI+THAs</i>                      | 0.0379         | 0.9172        |
| Free Glu        | <i>AKs</i>                                    | 0.3883         | 0.2675        |
| Free Glu        | <i>AKs/AK-HSDHs</i>                           | 0.3404         | 0.3358        |
| Free Glu        | <i>AKs+AK-HSDHs</i>                           | 0.3768         | 0.2831        |
| Free Glu        | <i>AKs+AK-HSDHs+CGS1</i>                      | 0.3431         | 0.3318        |
| Free Glu        | <i>AKs+AK-HSDHs+DHDPSs</i>                    | 0.3964         | 0.2568        |
| Free Glu        | <i>AKs+AK-HSDHs+TSI</i>                       | 0.3398         | 0.3367        |
| Free Glu        | <i>AKs+AK-HSDHs+TSI+TDI</i>                   | 0.3671         | 0.2967        |
| Free Glu        | <i>AKs+AK-HSDHs+TSI+THAs</i>                  | 0.3373         | 0.3405        |
| <b>Free Glu</b> | <b><i>AKs+DHDPSs</i></b>                      | <b>0.4103</b>  | <b>0.2390</b> |
| <b>Free Glu</b> | <b><i>BCAT1</i></b>                           | <b>-0.8139</b> | <b>0.0042</b> |
| Free Glu        | Biosynthetic genes analyzed                   | 0.3147         | 0.3758        |
| Free Glu        | Catabolic genes analyzed                      | 0.0797         | 0.8268        |
| Free Glu        | <i>CGS1</i>                                   | -0.0509        | 0.8890        |
| Free Glu        | <i>CGS1/SAMs</i>                              | -0.0982        | 0.7872        |
| Free Glu        | <i>CGS1/TSI</i>                               | -0.0270        | 0.9409        |
| <b>Free Glu</b> | <b><i>DHDPS1</i></b>                          | <b>0.5393</b>  | <b>0.1077</b> |
| Free Glu        | <i>DHDPS2</i>                                 | 0.3709         | 0.2914        |
| <b>Free Glu</b> | <b><i>DHDPSs</i></b>                          | <b>0.5956</b>  | <b>0.0693</b> |
| Free Glu        | <i>DHDPSs/AK-HSDHs</i>                        | 0.3408         | 0.3352        |
| Free Glu        | <i>DHDPSs/LKR-SDHI</i>                        | -0.0598        | 0.8697        |
| <b>Free Glu</b> | <b>Free Ala</b>                               | <b>0.5743</b>  | <b>0.0825</b> |
| <b>Free Glu</b> | <b>Free Arg</b>                               | <b>0.4827</b>  | <b>0.1576</b> |
| <b>Free Glu</b> | <b>Free Asn</b>                               | <b>0.7998</b>  | <b>0.0055</b> |
| <b>Free Glu</b> | <b>Free Asp</b>                               | <b>0.8574</b>  | <b>0.0015</b> |

|                 |                                                     |                |               |
|-----------------|-----------------------------------------------------|----------------|---------------|
| <b>Free Glu</b> | <b>Free Cys</b>                                     | <b>0.4341</b>  | <b>0.2101</b> |
| <b>Free Glu</b> | <b>Free Gln</b>                                     | <b>0.7514</b>  | <b>0.0122</b> |
| Free Glu        | HSDH activity with four effectors                   | -0.1970        | 0.5854        |
| <b>Free Glu</b> | <b>HSDH activity without effectors</b>              | <b>-0.5413</b> | <b>0.1061</b> |
| Free Glu        | <i>LKR-SDHI</i>                                     | 0.3130         | 0.3785        |
| <b>Free Glu</b> | <b>Lys-sensitive AK activity</b>                    | <b>-0.4008</b> | <b>0.2511</b> |
| Free Glu        | Lys-sensitive AK activity/Thr-sensitive AK activity | 0.0786         | 0.8290        |
| <b>Free Glu</b> | <b>SAMS1</b>                                        | <b>0.6090</b>  | <b>0.0617</b> |
| <b>Free Glu</b> | <b>SAMS2</b>                                        | <b>0.6086</b>  | <b>0.0619</b> |
| Free Glu        | <i>SAMS3</i>                                        | -0.2311        | 0.5207        |
| Free Glu        | <i>SAMS4</i>                                        | 0.0983         | 0.7870        |
| Free Glu        | <i>SAMSs</i>                                        | 0.0792         | 0.8278        |
| <b>Free Glu</b> | <b>TD1</b>                                          | <b>0.5868</b>  | <b>0.0745</b> |
| Free Glu        | <i>TD1/BCAT1</i>                                    | 0.2191         | 0.5431        |
| Free Glu        | <i>THA1</i>                                         | -0.0661        | 0.8560        |
| Free Glu        | <i>THA2</i>                                         | -0.0390        | 0.9148        |
| Free Glu        | <i>THAs</i>                                         | 0.0537         | 0.8828        |
| <b>Free Glu</b> | <b>THAs+TD1</b>                                     | <b>0.5636</b>  | <b>0.0898</b> |
| Free Glu        | Thr-sensitive AK activity                           | -0.2900        | 0.4163        |
| Free Glu        | <i>TS1</i>                                          | 0.0953         | 0.7935        |
| <b>Free Glu</b> | <b>TS1/(THAs+TD1)</b>                               | <b>-0.7362</b> | <b>0.0152</b> |
| <b>Free Glu</b> | <b>TS1/TD1</b>                                      | <b>-0.6703</b> | <b>0.0339</b> |
| Free Glu        | <i>TS1/THAs</i>                                     | 0.1931         | 0.5929        |
| <b>Free Gly</b> | <b>(AK-HSDHs+CGS1)/SAMSs</b>                        | <b>-0.7265</b> | <b>0.0173</b> |
| <b>Free Gly</b> | <b>(AK-HSDHs+TS1)/(THAs+TD1)</b>                    | <b>-0.4886</b> | <b>0.1518</b> |
| Free Gly        | <i>(AK-HSDHs+TS1+TD1)/BCAT1</i>                     | 0.2050         | 0.5699        |
| Free Gly        | <i>(AKs+AK-HSDHs)/AK-HSDHs</i>                      | -0.3615        | 0.3047        |
| <b>Free Gly</b> | <b>(AKs+AK-HSDHs+CGS1)/SAMSs</b>                    | <b>-0.4799</b> | <b>0.1604</b> |
| Free Gly        | <i>(AKs+AK-HSDHs+DHDPSs)/LKR-SDHI</i>               | -0.1097        | 0.7628        |
| <b>Free Gly</b> | <b>(AKs+AK-HSDHs+TS1)/(THAs+TD1)</b>                | <b>-0.6445</b> | <b>0.0443</b> |
| Free Gly        | <i>(AKs+AK-HSDHs+TS1+TD1)/BCAT1</i>                 | 0.1955         | 0.5884        |
| Free Gly        | <i>(AKs+DHDPSs)/LKR-SDHI</i>                        | -0.2200        | 0.5414        |
| Free Gly        | AK activity with four effectors                     | -0.3238        | 0.3614        |
| <b>Free Gly</b> | <b>AK activity without effectors</b>                | <b>-0.5067</b> | <b>0.1350</b> |
| Free Gly        | AK activity/HSDH activity with four effectors       | -0.2689        | 0.4526        |
| Free Gly        | AK activity/HSDH activity without effectors         | -0.2646        | 0.4600        |
| Free Gly        | <i>AK1</i>                                          | 0.3346         | 0.3446        |
| Free Gly        | <i>AK1+AK2</i>                                      | -0.2611        | 0.4663        |
| <b>Free Gly</b> | <b>AK1+AK3</b>                                      | <b>0.4176</b>  | <b>0.2298</b> |
| Free Gly        | <i>AK2</i>                                          | -0.3205        | 0.3667        |
| Free Gly        | <i>AK2+AK3</i>                                      | -0.2872        | 0.4210        |
| Free Gly        | <i>AK3</i>                                          | 0.1376         | 0.7046        |
| Free Gly        | <i>AK-HSDH1</i>                                     | 0.0515         | 0.8877        |
| <b>Free Gly</b> | <b>AK-HSDH2</b>                                     | <b>0.5610</b>  | <b>0.0916</b> |
| Free Gly        | <i>AK-HSDHs</i>                                     | 0.3939         | 0.2601        |
| Free Gly        | <i>AK-HSDHs+CGS1</i>                                | 0.2909         | 0.4148        |
| Free Gly        | <i>AK-HSDHs+TS1</i>                                 | 0.2959         | 0.4065        |
| Free Gly        | <i>AK-HSDHs+TS1+TD1</i>                             | 0.3458         | 0.3278        |
| Free Gly        | <i>AK-HSDHs+TS1+THAs</i>                            | 0.2850         | 0.4247        |
| Free Gly        | <i>AKs</i>                                          | -0.2310        | 0.5207        |
| Free Gly        | <i>AKs/AK-HSDHs</i>                                 | -0.3615        | 0.3047        |
| Free Gly        | <i>AKs+AK-HSDHs</i>                                 | -0.1346        | 0.7109        |
| Free Gly        | <i>AKs+AK-HSDHs+CGS1</i>                            | -0.1002        | 0.7829        |
| Free Gly        | <i>AKs+AK-HSDHs+DHDPSs</i>                          | -0.1041        | 0.7748        |
| Free Gly        | <i>AKs+AK-HSDHs+TS1</i>                             | -0.0064        | 0.9861        |
| Free Gly        | <i>AKs+AK-HSDHs+TS1+TD1</i>                         | 0.0408         | 0.9108        |
| Free Gly        | <i>AKs+AK-HSDHs+TS1+THAs</i>                        | -0.0131        | 0.9714        |

|                     |                                                            |                |               |
|---------------------|------------------------------------------------------------|----------------|---------------|
| Free Gly            | <i>AKs+DHDPSs</i>                                          | -0.1999        | 0.5797        |
| <b>Free Gly</b>     | <b><i>BCAT1</i></b>                                        | <b>-0.6924</b> | <b>0.0265</b> |
| Free Gly            | Biosynthetic genes analyzed                                | 0.0370         | 0.9192        |
| <b>Free Gly</b>     | <b>Catabolic genes analyzed</b>                            | <b>0.6752</b>  | <b>0.0322</b> |
| Free Gly            | <i>CGS1</i>                                                | 0.1270         | 0.7266        |
| <b>Free Gly</b>     | <b><i>CGS1/SAMSs</i></b>                                   | <b>-0.7067</b> | <b>0.0223</b> |
| Free Gly            | <i>CGS1/TS1</i>                                            | -0.1642        | 0.6503        |
| <b>Free Gly</b>     | <b><i>DHDPS1</i></b>                                       | <b>0.5081</b>  | <b>0.1338</b> |
| <b>Free Gly</b>     | <b><i>DHDPS2</i></b>                                       | <b>0.6119</b>  | <b>0.0601</b> |
| <b>Free Gly</b>     | <b><i>DHDPSs</i></b>                                       | <b>0.7527</b>  | <b>0.0120</b> |
| Free Gly            | <i>DHDPSs/AK-HSDHs</i>                                     | -0.2478        | 0.4900        |
| <b>Free Gly</b>     | <b><i>DHDPSs/LKR-SDHI</i></b>                              | <b>0.4608</b>  | <b>0.1801</b> |
| <b>Free Gly</b>     | <b>Free Ala</b>                                            | <b>0.7150</b>  | <b>0.0201</b> |
| <b>Free Gly</b>     | <b>Free Arg</b>                                            | <b>0.4472</b>  | <b>0.1950</b> |
| <b>Free Gly</b>     | <b>Free Asn</b>                                            | <b>0.7900</b>  | <b>0.0065</b> |
| <b>Free Gly</b>     | <b>Free Asp</b>                                            | <b>0.8533</b>  | <b>0.0017</b> |
| Free Gly            | Free Cys                                                   | 0.3174         | 0.3715        |
| <b>Free Gly</b>     | <b>Free Gln</b>                                            | <b>0.8765</b>  | <b>0.0009</b> |
| <b>Free Gly</b>     | <b>Free Glu</b>                                            | <b>0.5999</b>  | <b>0.0668</b> |
| Free Gly            | HSDH activity with four effectors                          | 0.1605         | 0.6578        |
| Free Gly            | HSDH activity without effectors                            | -0.0211        | 0.9539        |
| Free Gly            | <i>LKR-SDHI</i>                                            | -0.1470        | 0.6854        |
| <b>Free Gly</b>     | <b>Lys-sensitive AK activity</b>                           | <b>-0.7021</b> | <b>0.0236</b> |
| <b>Free Gly</b>     | <b>Lys-sensitive AK activity/Thr-sensitive AK activity</b> | <b>-0.4314</b> | <b>0.2132</b> |
| <b>Free Gly</b>     | <b><i>SAMS1</i></b>                                        | <b>0.7551</b>  | <b>0.0116</b> |
| <b>Free Gly</b>     | <b><i>SAMS2</i></b>                                        | <b>0.5401</b>  | <b>0.1070</b> |
| <b>Free Gly</b>     | <b><i>SAMS3</i></b>                                        | <b>0.4093</b>  | <b>0.2402</b> |
| <b>Free Gly</b>     | <b><i>SAMS4</i></b>                                        | <b>0.5815</b>  | <b>0.0779</b> |
| <b>Free Gly</b>     | <b><i>SAMSs</i></b>                                        | <b>0.6761</b>  | <b>0.0318</b> |
| <b>Free Gly</b>     | <b><i>TD1</i></b>                                          | <b>0.7438</b>  | <b>0.0137</b> |
| Free Gly            | <i>TD1/BCAT1</i>                                           | 0.2771         | 0.4383        |
| Free Gly            | <i>THA1</i>                                                | -0.2419        | 0.5008        |
| <b>Free Gly</b>     | <b><i>THA2</i></b>                                         | <b>-0.4364</b> | <b>0.2073</b> |
| <b>Free Gly</b>     | <b><i>THAs</i></b>                                         | <b>-0.4451</b> | <b>0.1974</b> |
| <b>Free Gly</b>     | <b><i>THAs+TD1</i></b>                                     | <b>0.6286</b>  | <b>0.0516</b> |
| Free Gly            | Thr-sensitive AK activity                                  | 0.0299         | 0.9347        |
| Free Gly            | <i>TS1</i>                                                 | 0.2114         | 0.5577        |
| <b>Free Gly</b>     | <b><i>TS1/(THAs+TD1)</i></b>                               | <b>-0.6417</b> | <b>0.0455</b> |
| <b>Free Gly</b>     | <b><i>TS1/TD1</i></b>                                      | <b>-0.6234</b> | <b>0.0541</b> |
| <b>Free Gly</b>     | <b><i>TS1/THAs</i></b>                                     | <b>0.8185</b>  | <b>0.0038</b> |
| Free Gly/Thr        | <i>(AK-HSDHs+CGS1)/SAMSs</i>                               | -0.3532        | 0.3168        |
| Free Gly/Thr        | <i>(AK-HSDHs+TS1)/(THAs+TD1)</i>                           | 0.0308         | 0.9328        |
| Free Gly/Thr        | <i>(AK-HSDHs+TS1+TD1)/BCAT1</i>                            | -0.0072        | 0.9843        |
| <b>Free Gly/Thr</b> | <b><i>(AKs+AK-HSDHs)/AK-HSDHs</i></b>                      | <b>-0.7058</b> | <b>0.0226</b> |
| <b>Free Gly/Thr</b> | <b><i>(AKs+AK-HSDHs+CGS1)/SAMSs</i></b>                    | <b>-0.7629</b> | <b>0.0103</b> |
| Free Gly/Thr        | <i>(AKs+AK-HSDHs+DHDPSs)/LKR-SDHI</i>                      | -0.2316        | 0.5196        |
| Free Gly/Thr        | <i>(AKs+AK-HSDHs+TS1)/(THAs+TD1)</i>                       | -0.3982        | 0.2544        |
| Free Gly/Thr        | <i>(AKs+AK-HSDHs+TS1+TD1)/BCAT1</i>                        | -0.0356        | 0.9222        |
| <b>Free Gly/Thr</b> | <b><i>(AKs+DHDPSs)/LKR-SDHI</i></b>                        | <b>-0.4194</b> | <b>0.2276</b> |
| <b>Free Gly/Thr</b> | <b>AK activity with four effectors</b>                     | <b>-0.6729</b> | <b>0.0330</b> |
| <b>Free Gly/Thr</b> | <b>AK activity without effectors</b>                       | <b>-0.7418</b> | <b>0.0140</b> |
| <b>Free Gly/Thr</b> | <b>AK activity/HSDH activity with four effectors</b>       | <b>-0.7331</b> | <b>0.0158</b> |
| <b>Free Gly/Thr</b> | <b>AK activity/HSDH activity without effectors</b>         | <b>-0.6863</b> | <b>0.0284</b> |
| Free Gly/Thr        | <i>AK1</i>                                                 | 0.2119         | 0.5566        |
| <b>Free Gly/Thr</b> | <b><i>AK1+AK2</i></b>                                      | <b>-0.8276</b> | <b>0.0031</b> |
| Free Gly/Thr        | <i>AK1+AK3</i>                                             | 0.2616         | 0.4653        |
| <b>Free Gly/Thr</b> | <b><i>AK2</i></b>                                          | <b>-0.8419</b> | <b>0.0023</b> |
| <b>Free Gly/Thr</b> | <b><i>AK2+AK3</i></b>                                      | <b>-0.8019</b> | <b>0.0053</b> |



|                     |                                     |                |                  |
|---------------------|-------------------------------------|----------------|------------------|
| Free Gly/Thr        | AK3                                 | 0.0968         | 0.7903           |
| Free Gly/Thr        | AK-HSDH1                            | 0.2744         | 0.4429           |
| Free Gly/Thr        | AK-HSDH2                            | 0.3493         | 0.3225           |
| Free Gly/Thr        | AK-HSDHs                            | 0.3809         | 0.2775           |
| Free Gly/Thr        | AK-HSDHs+CGSI                       | 0.2010         | 0.5777           |
| Free Gly/Thr        | AK-HSDHs+TS1                        | 0.1014         | 0.7805           |
| Free Gly/Thr        | AK-HSDHs+TS1+TD1                    | 0.1135         | 0.7548           |
| Free Gly/Thr        | AK-HSDHs+TS1+THAs                   | 0.0864         | 0.8124           |
| <b>Free Gly/Thr</b> | <b>AKs</b>                          | <b>-0.7958</b> | <b>0.0059</b>    |
| <b>Free Gly/Thr</b> | <b>AKs/AK-HSDHs</b>                 | <b>-0.7058</b> | <b>0.0226</b>    |
| <b>Free Gly/Thr</b> | <b>AKs+AK-HSDHs</b>                 | <b>-0.7261</b> | <b>0.0174</b>    |
| <b>Free Gly/Thr</b> | <b>AKs+AK-HSDHs+CGSI</b>            | <b>-0.6942</b> | <b>0.0259</b>    |
| <b>Free Gly/Thr</b> | <b>AKs+AK-HSDHs+DHDPSs</b>          | <b>-0.7117</b> | <b>0.0210</b>    |
| <b>Free Gly/Thr</b> | <b>AKs+AK-HSDHs+TS1</b>             | <b>-0.5862</b> | <b>0.0749</b>    |
| <b>Free Gly/Thr</b> | <b>AKs+AK-HSDHs+TS1+TD1</b>         | <b>-0.5556</b> | <b>0.0954</b>    |
| <b>Free Gly/Thr</b> | <b>AKs+AK-HSDHs+TS1+THAs</b>        | <b>-0.5940</b> | <b>0.0702</b>    |
| <b>Free Gly/Thr</b> | <b>AKs+DHDPSs</b>                   | <b>-0.7846</b> | <b>0.0072</b>    |
| Free Gly/Thr        | BCAT1                               | -0.2206        | 0.5403           |
| <b>Free Gly/Thr</b> | <b>Biosynthetic genes analyzed</b>  | <b>-0.5292</b> | <b>0.1158</b>    |
| Free Gly/Thr        | Catabolic genes analyzed            | 0.3690         | 0.2940           |
| Free Gly/Thr        | CGSI                                | -0.0345        | 0.9247           |
| <b>Free Gly/Thr</b> | <b>CGSI/SAMs</b>                    | <b>-0.4670</b> | <b>0.1736</b>    |
| Free Gly/Thr        | CGSI/TS1                            | -0.0912        | 0.8022           |
| Free Gly/Thr        | DHDPS1                              | 0.0088         | 0.9808           |
| Free Gly/Thr        | DHDPS2                              | 0.2771         | 0.4382           |
| Free Gly/Thr        | DHDPSs                              | 0.2007         | 0.5782           |
| Free Gly/Thr        | DHDPSs/AK-HSDHs                     | -0.3526        | 0.3177           |
| Free Gly/Thr        | DHDPSs/LKR-SDH1                     | 0.3814         | 0.2768           |
| <b>Free Gly/Thr</b> | <b>Free (Lys+Met+Thr+Ile)/Asp</b>   | <b>-0.7905</b> | <b>0.0065</b>    |
| <b>Free Gly/Thr</b> | <b>Free Ala</b>                     | <b>0.4202</b>  | <b>0.2266</b>    |
| Free Gly/Thr        | Free Arg                            | 0.0941         | 0.7960           |
| Free Gly/Thr        | Free Asn                            | 0.2403         | 0.5037           |
| <b>Free Gly/Thr</b> | <b>Free Asn+Asp</b>                 | <b>0.4479</b>  | <b>0.1942</b>    |
| <b>Free Gly/Thr</b> | <b>Free Asn+Asp+Lys+Met+Thr+Ile</b> | <b>-0.4754</b> | <b>0.1650</b>    |
| <b>Free Gly/Thr</b> | <b>Free Asn+Asp+Lys+Thr+Ile</b>     | <b>-0.4776</b> | <b>0.1627</b>    |
| <b>Free Gly/Thr</b> | <b>Free Asp</b>                     | <b>0.4700</b>  | <b>0.1705</b>    |
| <b>Free Gly/Thr</b> | <b>Free Asp+Lys+Met+Thr+Ile</b>     | <b>-0.5045</b> | <b>0.1370</b>    |
| <b>Free Gly/Thr</b> | <b>Free Cys</b>                     | <b>-0.5244</b> | <b>0.1197</b>    |
| Free Gly/Thr        | Free Gln                            | 0.3223         | 0.3638           |
| Free Gly/Thr        | Free Glu                            | 0.0866         | 0.8121           |
| <b>Free Gly/Thr</b> | <b>Free Gly</b>                     | <b>0.5125</b>  | <b>0.1299</b>    |
| <b>Free Gly/Thr</b> | <b>Free Gly+Ile</b>                 | <b>0.4870</b>  | <b>0.1535</b>    |
| Free Gly/Thr        | Free His                            | 0.1259         | 0.7289           |
| Free Gly/Thr        | Free Ile                            | -0.3205        | 0.3666           |
| Free Gly/Thr        | Free Leu                            | 0.2809         | 0.4318           |
| Free Gly/Thr        | Free Lys                            | 0.1055         | 0.7718           |
| <b>Free Gly/Thr</b> | <b>Free Lys/(Met+Thr+Ile)</b>       | <b>0.9141</b>  | <b>0.0002</b>    |
| <b>Free Gly/Thr</b> | <b>Free Lys/Thr</b>                 | <b>0.9152</b>  | <b>0.0002</b>    |
| <b>Free Gly/Thr</b> | <b>Free Lys+Met+Thr+Ile</b>         | <b>-0.7364</b> | <b>0.0151</b>    |
| Free Gly/Thr        | Free Met                            | 0.2928         | 0.4116           |
| <b>Free Gly/Thr</b> | <b>Free Met/Thr</b>                 | <b>0.9346</b>  | <b>&lt;.0001</b> |
| <b>Free Gly/Thr</b> | <b>Free Met+Thr+Ile</b>             | <b>-0.7393</b> | <b>0.0146</b>    |
| Free Gly/Thr        | Free Phe                            | 0.3723         | 0.2893           |
| Free Gly/Thr        | Free Pro                            | 0.3363         | 0.3420           |
| <b>Free Gly/Thr</b> | <b>Free Ser</b>                     | <b>0.7755</b>  | <b>0.0084</b>    |
| <b>Free Gly/Thr</b> | <b>Free Thr</b>                     | <b>-0.7404</b> | <b>0.0143</b>    |
| <b>Free Gly/Thr</b> | <b>Free Trp</b>                     | <b>0.4798</b>  | <b>0.1605</b>    |
| Free Gly/Thr        | Free Tyr                            | 0.1974         | 0.5846           |

|                     |                                                            |                |               |
|---------------------|------------------------------------------------------------|----------------|---------------|
| Free Gly/Thr        | Free Val                                                   | 0.3064         | 0.3893        |
| Free Gly/Thr        | HSDH activity with four effectors                          | 0.1465         | 0.6864        |
| Free Gly/Thr        | HSDH activity without effectors                            | 0.1149         | 0.7520        |
| Free Gly/Thr        | <i>LKR-SDHI</i>                                            | -0.2670        | 0.4558        |
| <b>Free Gly/Thr</b> | <b>Lys-sensitive AK activity</b>                           | <b>-0.8594</b> | <b>0.0014</b> |
| <b>Free Gly/Thr</b> | <b>Lys-sensitive AK activity/Thr-sensitive AK activity</b> | <b>-0.7034</b> | <b>0.0232</b> |
| <b>Free Gly/Thr</b> | <b><i>SAMS1</i></b>                                        | <b>0.4803</b>  | <b>0.1600</b> |
| Free Gly/Thr        | <i>SAMS2</i>                                               | 0.0206         | 0.9551        |
| Free Gly/Thr        | <i>SAMS3</i>                                               | 0.1998         | 0.5800        |
| Free Gly/Thr        | <i>SAMS4</i>                                               | 0.3345         | 0.3448        |
| Free Gly/Thr        | <i>SAMSs</i>                                               | 0.3725         | 0.2892        |
| Free Gly/Thr        | <i>TD1</i>                                                 | 0.2208         | 0.5399        |
| Free Gly/Thr        | <i>TD1/BCAT1</i>                                           | 0.0273         | 0.9404        |
| Free Gly/Thr        | <i>THA1</i>                                                | 0.1042         | 0.7744        |
| <b>Free Gly/Thr</b> | <b><i>THA2</i></b>                                         | <b>-0.7494</b> | <b>0.0126</b> |
| <b>Free Gly/Thr</b> | <b><i>THAs</i></b>                                         | <b>-0.7760</b> | <b>0.0083</b> |
| Free Gly/Thr        | <i>THAs+TD1</i>                                            | 0.0656         | 0.8572        |
| <b>Free Gly/Thr</b> | <b>Thr-sensitive AK activity</b>                           | <b>0.5567</b>  | <b>0.0946</b> |
| Free Gly/Thr        | Total free AAs                                             | 0.1640         | 0.6508        |
| Free Gly/Thr        | <i>TS1</i>                                                 | -0.0356        | 0.9221        |
| Free Gly/Thr        | <i>TS1/(THAs+TD1)</i>                                      | -0.0286        | 0.9376        |
| Free Gly/Thr        | <i>TS1/TD1</i>                                             | -0.0588        | 0.8718        |
| <b>Free Gly/Thr</b> | <b><i>TS1/THAs</i></b>                                     | <b>0.5799</b>  | <b>0.0789</b> |
| <b>Free Gly+Ile</b> | <b><i>(AK-HSDHs+CGS1)/SAMSs</i></b>                        | <b>-0.7116</b> | <b>0.0210</b> |
| <b>Free Gly+Ile</b> | <b><i>(AK-HSDHs+TS1)/(THAs+TD1)</i></b>                    | <b>-0.5127</b> | <b>0.1297</b> |
| Free Gly+Ile        | <i>(AK-HSDHs+TS1+TD1)/BCAT1</i>                            | 0.2278         | 0.5267        |
| Free Gly+Ile        | <i>(AKs+AK-HSDHs)/AK-HSDHs</i>                             | -0.3526        | 0.3177        |
| <b>Free Gly+Ile</b> | <b><i>(AKs+AK-HSDHs+CGS1)/SAMSs</i></b>                    | <b>-0.4684</b> | <b>0.1721</b> |
| Free Gly+Ile        | <i>(AKs+AK-HSDHs+DHDPSs)/LKR-SDHI</i>                      | -0.1202        | 0.7409        |
| <b>Free Gly+Ile</b> | <b><i>(AKs+AK-HSDHs+TS1)/(THAs+TD1)</i></b>                | <b>-0.6686</b> | <b>0.0345</b> |
| Free Gly+Ile        | <i>(AKs+AK-HSDHs+TS1+TD1)/BCAT1</i>                        | 0.2179         | 0.5453        |
| Free Gly+Ile        | <i>(AKs+DHDPSs)/LKR-SDHI</i>                               | -0.2297        | 0.5231        |
| Free Gly+Ile        | AK activity with four effectors                            | -0.3124        | 0.3795        |
| <b>Free Gly+Ile</b> | <b>AK activity without effectors</b>                       | <b>-0.4828</b> | <b>0.1576</b> |
| Free Gly+Ile        | AK activity/HSDH activity with four effectors              | -0.2749        | 0.4421        |
| Free Gly+Ile        | AK activity/HSDH activity without effectors                | -0.2715        | 0.4479        |
| Free Gly+Ile        | <i>AK1</i>                                                 | 0.3054         | 0.3909        |
| Free Gly+Ile        | <i>AK1+AK2</i>                                             | -0.2502        | 0.4857        |
| Free Gly+Ile        | <i>AK1+AK3</i>                                             | 0.3903         | 0.2649        |
| Free Gly+Ile        | <i>AK2</i>                                                 | -0.3039        | 0.3933        |
| Free Gly+Ile        | <i>AK2+AK3</i>                                             | -0.2714        | 0.4482        |
| Free Gly+Ile        | <i>AK3</i>                                                 | 0.1367         | 0.7066        |
| Free Gly+Ile        | <i>AK-HSDH1</i>                                            | 0.0588         | 0.8719        |
| <b>Free Gly+Ile</b> | <b><i>AK-HSDH2</i></b>                                     | <b>0.5540</b>  | <b>0.0966</b> |
| Free Gly+Ile        | <i>AK-HSDHs</i>                                            | 0.3936         | 0.2604        |
| Free Gly+Ile        | <i>AK-HSDHs+CGS1</i>                                       | 0.3059         | 0.3900        |
| Free Gly+Ile        | <i>AK-HSDHs+TS1</i>                                        | 0.3269         | 0.3566        |
| Free Gly+Ile        | <i>AK-HSDHs+TS1+TD1</i>                                    | 0.3776         | 0.2820        |
| Free Gly+Ile        | <i>AK-HSDHs+TS1+THAs</i>                                   | 0.3170         | 0.3721        |
| Free Gly+Ile        | <i>AKs</i>                                                 | -0.2205        | 0.5404        |
| Free Gly+Ile        | <i>AKs/AK-HSDHs</i>                                        | -0.3526        | 0.3177        |
| Free Gly+Ile        | <i>AKs+AK-HSDHs</i>                                        | -0.1237        | 0.7334        |
| Free Gly+Ile        | <i>AKs+AK-HSDHs+CGS1</i>                                   | -0.0835        | 0.8187        |
| Free Gly+Ile        | <i>AKs+AK-HSDHs+DHDPSs</i>                                 | -0.0923        | 0.7998        |
| Free Gly+Ile        | <i>AKs+AK-HSDHs+TS1</i>                                    | 0.0213         | 0.9533        |
| Free Gly+Ile        | <i>AKs+AK-HSDHs+TS1+TD1</i>                                | 0.0696         | 0.8485        |
| Free Gly+Ile        | <i>AKs+AK-HSDHs+TS1+THAs</i>                               | 0.0150         | 0.9671        |

|                     |                                                            |                |                  |
|---------------------|------------------------------------------------------------|----------------|------------------|
| Free Gly+Ile        | <i>AKs+DHDPSs</i>                                          | -0.1884        | 0.6022           |
| <b>Free Gly+Ile</b> | <b><i>BCAT1</i></b>                                        | <b>-0.7148</b> | <b>0.0202</b>    |
| Free Gly+Ile        | Biosynthetic genes analyzed                                | 0.0676         | 0.8528           |
| <b>Free Gly+Ile</b> | <b>Catabolic genes analyzed</b>                            | <b>0.6792</b>  | <b>0.0308</b>    |
| Free Gly+Ile        | <i>CGS1</i>                                                | 0.1554         | 0.6682           |
| <b>Free Gly+Ile</b> | <b><i>CGS1/SAMSs</i></b>                                   | <b>-0.6886</b> | <b>0.0277</b>    |
| Free Gly+Ile        | <i>CGS1/TS1</i>                                            | -0.1870        | 0.6049           |
| <b>Free Gly+Ile</b> | <b><i>DHDPS1</i></b>                                       | <b>0.5452</b>  | <b>0.1031</b>    |
| <b>Free Gly+Ile</b> | <b><i>DHDPS2</i></b>                                       | <b>0.6217</b>  | <b>0.0550</b>    |
| <b>Free Gly+Ile</b> | <b><i>DHDPSs</i></b>                                       | <b>0.7805</b>  | <b>0.0077</b>    |
| Free Gly+Ile        | <i>DHDPSs/AK-HSDHs</i>                                     | -0.2377        | 0.5084           |
| <b>Free Gly+Ile</b> | <b><i>DHDPSs/LKR-SDHI</i></b>                              | <b>0.4602</b>  | <b>0.1808</b>    |
| <b>Free Gly+Ile</b> | <b>Free Ala</b>                                            | <b>0.7387</b>  | <b>0.0147</b>    |
| <b>Free Gly+Ile</b> | <b>Free Arg</b>                                            | <b>0.4739</b>  | <b>0.1664</b>    |
| <b>Free Gly+Ile</b> | <b>Free Asn</b>                                            | <b>0.8100</b>  | <b>0.0045</b>    |
| <b>Free Gly+Ile</b> | <b>Free Asn+Asp</b>                                        | <b>0.8618</b>  | <b>0.0013</b>    |
| Free Gly+Ile        | Free Asn+Asp+Lys+Met+Thr+Ile                               | 0.3353         | 0.3436           |
| Free Gly+Ile        | Free Asn+Asp+Lys+Thr+Ile                                   | 0.3309         | 0.3504           |
| <b>Free Gly+Ile</b> | <b>Free Asp</b>                                            | <b>0.8573</b>  | <b>0.0015</b>    |
| Free Gly+Ile        | Free Asp+Lys+Met+Thr+Ile                                   | 0.2901         | 0.4161           |
| Free Gly+Ile        | Free Cys                                                   | 0.3415         | 0.3342           |
| <b>Free Gly+Ile</b> | <b>Free Gln</b>                                            | <b>0.8897</b>  | <b>0.0006</b>    |
| <b>Free Gly+Ile</b> | <b>Free Glu</b>                                            | <b>0.6028</b>  | <b>0.0651</b>    |
| <b>Free Gly+Ile</b> | <b>Free Gly</b>                                            | <b>0.9980</b>  | <b>&lt;.0001</b> |
| <b>Free Gly+Ile</b> | <b>Free His</b>                                            | <b>0.6548</b>  | <b>0.0399</b>    |
| Free Gly+Ile        | Free Ile                                                   | 0.1935         | 0.5922           |
| <b>Free Gly+Ile</b> | <b>Free Leu</b>                                            | <b>0.6686</b>  | <b>0.0345</b>    |
| <b>Free Gly+Ile</b> | <b>Free Lys</b>                                            | <b>0.5787</b>  | <b>0.0796</b>    |
| Free Gly+Ile        | Free Lys+Met+Thr+Ile                                       | -0.0616        | 0.8658           |
| <b>Free Gly+Ile</b> | <b>Free Met</b>                                            | <b>0.5104</b>  | <b>0.1317</b>    |
| Free Gly+Ile        | Free Met+Thr+Ile                                           | -0.0827        | 0.8203           |
| <b>Free Gly+Ile</b> | <b>Free Phe</b>                                            | <b>0.6493</b>  | <b>0.0422</b>    |
| <b>Free Gly+Ile</b> | <b>Free Pro</b>                                            | <b>0.8576</b>  | <b>0.0015</b>    |
| <b>Free Gly+Ile</b> | <b>Free Ser</b>                                            | <b>0.8458</b>  | <b>0.0020</b>    |
| Free Gly+Ile        | Free Thr                                                   | -0.0947        | 0.7947           |
| <b>Free Gly+Ile</b> | <b>Free Trp</b>                                            | <b>0.7365</b>  | <b>0.0151</b>    |
| Free Gly+Ile        | Free Tyr                                                   | 0.3287         | 0.3537           |
| <b>Free Gly+Ile</b> | <b>Free Val</b>                                            | <b>0.4352</b>  | <b>0.2088</b>    |
| Free Gly+Ile        | HSDH activity with four effectors                          | 0.1839         | 0.6111           |
| Free Gly+Ile        | HSDH activity without effectors                            | 0.0054         | 0.9883           |
| Free Gly+Ile        | <i>LKR-SDHI</i>                                            | -0.1293        | 0.7219           |
| <b>Free Gly+Ile</b> | <b>Lys-sensitive AK activity</b>                           | <b>-0.6938</b> | <b>0.0261</b>    |
| <b>Free Gly+Ile</b> | <b>Lys-sensitive AK activity/Thr-sensitive AK activity</b> | <b>-0.4033</b> | <b>0.2478</b>    |
| <b>Free Gly+Ile</b> | <b><i>SAMS1</i></b>                                        | <b>0.7718</b>  | <b>0.0089</b>    |
| <b>Free Gly+Ile</b> | <b><i>SAMS2</i></b>                                        | <b>0.5842</b>  | <b>0.0761</b>    |
| <b>Free Gly+Ile</b> | <b><i>SAMS3</i></b>                                        | <b>0.4018</b>  | <b>0.2497</b>    |
| <b>Free Gly+Ile</b> | <b><i>SAMS4</i></b>                                        | <b>0.5933</b>  | <b>0.0706</b>    |
| <b>Free Gly+Ile</b> | <b><i>SAMSs</i></b>                                        | <b>0.6798</b>  | <b>0.0306</b>    |
| <b>Free Gly+Ile</b> | <b><i>TD1</i></b>                                          | <b>0.7736</b>  | <b>0.0087</b>    |
| Free Gly+Ile        | <i>TD1/BCAT1</i>                                           | 0.3002         | 0.3993           |
| Free Gly+Ile        | <i>THA1</i>                                                | -0.2444        | 0.4962           |
| Free Gly+Ile        | <i>THA2</i>                                                | -0.3859        | 0.2708           |
| Free Gly+Ile        | <i>THAs</i>                                                | -0.3963        | 0.2569           |
| <b>Free Gly+Ile</b> | <b><i>THAs+TD1</i></b>                                     | <b>0.6677</b>  | <b>0.0349</b>    |
| Free Gly+Ile        | Thr-sensitive AK activity                                  | 0.0179         | 0.9609           |
| <b>Free Gly+Ile</b> | <b>Total free AAs</b>                                      | <b>0.8315</b>  | <b>0.0029</b>    |
| Free Gly+Ile        | <i>TS1</i>                                                 | 0.2521         | 0.4823           |
| <b>Free Gly+Ile</b> | <b><i>TS1/(THAs+TD1)</i></b>                               | <b>-0.6628</b> | <b>0.0367</b>    |

|                     |                                               |                |                  |
|---------------------|-----------------------------------------------|----------------|------------------|
| <b>Free Gly+Ile</b> | <i>TS1/TD1</i>                                | <b>-0.6511</b> | <b>0.0414</b>    |
| <b>Free Gly+Ile</b> | <i>TS1/THAs</i>                               | <b>0.8191</b>  | <b>0.0037</b>    |
| Free His            | <i>(AK-HSDHs+CGS1)/SAMs</i>                   | -0.1397        | 0.7004           |
| <b>Free His</b>     | <i>(AK-HSDHs+TS1)/(THAs+TD1)</i>              | <b>-0.4517</b> | <b>0.1901</b>    |
| <b>Free His</b>     | <i>(AK-HSDHs+TS1+TD1)/BCAT1</i>               | <b>0.5579</b>  | <b>0.0938</b>    |
| Free His            | <i>(AKs+AK-HSDHs)/AK-HSDHs</i>                | -0.2134        | 0.5538           |
| Free His            | <i>(AKs+AK-HSDHs+CGS1)/SAMs</i>               | -0.1556        | 0.6678           |
| Free His            | <i>(AKs+AK-HSDHs+DHDPSs)/LKR-SDHI</i>         | 0.2359         | 0.5117           |
| <b>Free His</b>     | <i>(AKs+AK-HSDHs+TS1)/(THAs+TD1)</i>          | <b>-0.5033</b> | <b>0.1381</b>    |
| <b>Free His</b>     | <i>(AKs+AK-HSDHs+TS1+TD1)/BCAT1</i>           | <b>0.5572</b>  | <b>0.0942</b>    |
| Free His            | <i>(AKs+DHDPSs)/LKR-SDHI</i>                  | 0.1697         | 0.6392           |
| Free His            | AK activity with four effectors               | 0.1560         | 0.6670           |
| Free His            | AK activity without effectors                 | -0.0229        | 0.9500           |
| Free His            | AK activity/HSDH activity with four effectors | -0.0943        | 0.7955           |
| Free His            | AK activity/HSDH activity without effectors   | -0.0193        | 0.9578           |
| Free His            | <i>AK1</i>                                    | -0.0628        | 0.8632           |
| Free His            | <i>AK1+AK2</i>                                | 0.0644         | 0.8597           |
| Free His            | <i>AK1+AK3</i>                                | 0.1427         | 0.6941           |
| Free His            | <i>AK2</i>                                    | 0.0759         | 0.8348           |
| Free His            | <i>AK2+AK3</i>                                | 0.1171         | 0.7473           |
| Free His            | <i>AK3</i>                                    | 0.2528         | 0.4810           |
| Free His            | <i>AK-HSDH1</i>                               | 0.0527         | 0.8850           |
| <b>Free His</b>     | <i>AK-HSDH2</i>                               | <b>0.7304</b>  | <b>0.0164</b>    |
| <b>Free His</b>     | <i>AK-HSDHs</i>                               | <b>0.5073</b>  | <b>0.1345</b>    |
| <b>Free His</b>     | <i>AK-HSDHs+CGS1</i>                          | <b>0.6513</b>  | <b>0.0414</b>    |
| <b>Free His</b>     | <i>AK-HSDHs+TS1</i>                           | <b>0.6484</b>  | <b>0.0426</b>    |
| <b>Free His</b>     | <i>AK-HSDHs+TS1+TD1</i>                       | <b>0.6873</b>  | <b>0.0281</b>    |
| <b>Free His</b>     | <i>AK-HSDHs+TS1+THAs</i>                      | <b>0.6498</b>  | <b>0.0420</b>    |
| Free His            | <i>AKs</i>                                    | 0.1094         | 0.7636           |
| Free His            | <i>AKs/AK-HSDHs</i>                           | -0.2134        | 0.5538           |
| Free His            | <i>AKs+AK-HSDHs</i>                           | 0.2479         | 0.4897           |
| Free His            | <i>AKs+AK-HSDHs+CGS1</i>                      | 0.3889         | 0.2667           |
| Free His            | <i>AKs+AK-HSDHs+DHDPSs</i>                    | 0.2773         | 0.4379           |
| <b>Free His</b>     | <i>AKs+AK-HSDHs+TS1</i>                       | <b>0.4883</b>  | <b>0.1522</b>    |
| <b>Free His</b>     | <i>AKs+AK-HSDHs+TS1+TD1</i>                   | <b>0.5285</b>  | <b>0.1163</b>    |
| <b>Free His</b>     | <i>AKs+AK-HSDHs+TS1+THAs</i>                  | <b>0.4864</b>  | <b>0.1540</b>    |
| Free His            | <i>AKs+DHDPSs</i>                             | 0.1420         | 0.6955           |
| <b>Free His</b>     | <i>BCAT1</i>                                  | <b>-0.8164</b> | <b>0.0040</b>    |
| <b>Free His</b>     | <b>Biosynthetic genes analyzed</b>            | <b>0.5805</b>  | <b>0.0785</b>    |
| <b>Free His</b>     | <b>Catabolic genes analyzed</b>               | <b>0.6273</b>  | <b>0.0522</b>    |
| <b>Free His</b>     | <i>CGS1</i>                                   | <b>0.6811</b>  | <b>0.0301</b>    |
| Free His            | <i>CGS1/SAMs</i>                              | -0.2778        | 0.4371           |
| Free His            | <i>CGS1/TS1</i>                               | -0.1202        | 0.7408           |
| <b>Free His</b>     | <i>DHDPS1</i>                                 | <b>0.4596</b>  | <b>0.1814</b>    |
| <b>Free His</b>     | <i>DHDPS2</i>                                 | <b>0.7993</b>  | <b>0.0055</b>    |
| <b>Free His</b>     | <i>DHDPSs</i>                                 | <b>0.8274</b>  | <b>0.0031</b>    |
| Free His            | <i>DHDPSs/AK-HSDHs</i>                        | -0.2745        | 0.4427           |
| <b>Free His</b>     | <i>DHDPSs/LKR-SDHI</i>                        | <b>0.5692</b>  | <b>0.0859</b>    |
| <b>Free His</b>     | <b>Free Ala</b>                               | <b>0.7851</b>  | <b>0.0071</b>    |
| <b>Free His</b>     | <b>Free Arg</b>                               | <b>0.9024</b>  | <b>0.0004</b>    |
| <b>Free His</b>     | <b>Free Asn</b>                               | <b>0.9428</b>  | <b>&lt;.0001</b> |
| <b>Free His</b>     | <b>Free Asp</b>                               | <b>0.7028</b>  | <b>0.0234</b>    |
| Free His            | Free Cys                                      | 0.2384         | 0.5072           |
| <b>Free His</b>     | <b>Free Gln</b>                               | <b>0.9028</b>  | <b>0.0003</b>    |
| <b>Free His</b>     | <b>Free Glu</b>                               | <b>0.6327</b>  | <b>0.0496</b>    |
| <b>Free His</b>     | <b>Free Gly</b>                               | <b>0.6264</b>  | <b>0.0527</b>    |
| <b>Free His</b>     | <b>HSDH activity with four effectors</b>      | <b>0.5334</b>  | <b>0.1123</b>    |
| Free His            | HSDH activity without effectors               | 0.1896         | 0.5998           |

|                 |                                                     |                |               |
|-----------------|-----------------------------------------------------|----------------|---------------|
| Free His        | <i>LKR-SDHI</i>                                     | -0.2605        | 0.4673        |
| Free His        | Lys-sensitive AK activity                           | -0.3732        | 0.2882        |
| Free His        | Lys-sensitive AK activity/Thr-sensitive AK activity | 0.0112         | 0.9755        |
| <b>Free His</b> | <b><i>SAMS1</i></b>                                 | <b>0.7288</b>  | <b>0.0168</b> |
| <b>Free His</b> | <b><i>SAMS2</i></b>                                 | <b>0.7343</b>  | <b>0.0156</b> |
| Free His        | <i>SAMS3</i>                                        | 0.3219         | 0.3644        |
| <b>Free His</b> | <b><i>SAMS4</i></b>                                 | <b>0.6731</b>  | <b>0.0329</b> |
| <b>Free His</b> | <b><i>SAMSs</i></b>                                 | <b>0.6262</b>  | <b>0.0528</b> |
| <b>Free His</b> | <b><i>TD1</i></b>                                   | <b>0.8736</b>  | <b>0.0010</b> |
| <b>Free His</b> | <b><i>TD1/BCAT1</i></b>                             | <b>0.6083</b>  | <b>0.0621</b> |
| <b>Free His</b> | <b><i>THA1</i></b>                                  | <b>-0.5628</b> | <b>0.0903</b> |
| Free His        | <i>THA2</i>                                         | 0.2188         | 0.5436        |
| Free His        | <i>THAs</i>                                         | 0.1892         | 0.6007        |
| <b>Free His</b> | <b><i>THAs+TD1</i></b>                              | <b>0.8787</b>  | <b>0.0008</b> |
| Free His        | Thr-sensitive AK activity                           | -0.0181        | 0.9604        |
| <b>Free His</b> | <b><i>TS1</i></b>                                   | <b>0.6239</b>  | <b>0.0539</b> |
| <b>Free His</b> | <b><i>TS1/(THAs+TD1)</i></b>                        | <b>-0.6163</b> | <b>0.0577</b> |
| <b>Free His</b> | <b><i>TS1/TD1</i></b>                               | <b>-0.5855</b> | <b>0.0753</b> |
| <b>Free His</b> | <b><i>TS1/THAs</i></b>                              | <b>0.5304</b>  | <b>0.1147</b> |
| Free Ile        | <i>(AK-HSDHs+CGS1)/SAMSs</i>                        | 0.1184         | 0.7446        |
| <b>Free Ile</b> | <b><i>(AK-HSDHs+TS1)/(THAs+TD1)</i></b>             | <b>-0.4602</b> | <b>0.1807</b> |
| Free Ile        | <i>(AK-HSDHs+TS1+TD1)/BCAT1</i>                     | 0.3940         | 0.2599        |
| Free Ile        | <i>(AKs+AK-HSDHs)/AK-HSDHs</i>                      | 0.0821         | 0.8215        |
| Free Ile        | <i>(AKs+AK-HSDHs+CGS1)/SAMSs</i>                    | 0.1035         | 0.7760        |
| Free Ile        | <i>(AKs+AK-HSDHs+DHDPSs)/LKR-SDHI</i>               | -0.1826        | 0.6137        |
| <b>Free Ile</b> | <b><i>(AKs+AK-HSDHs+TS1)/(THAs+TD1)</i></b>         | <b>-0.4865</b> | <b>0.1539</b> |
| Free Ile        | <i>(AKs+AK-HSDHs+TS1+TD1)/BCAT1</i>                 | 0.3871         | 0.2691        |
| Free Ile        | <i>(AKs+DHDPSs)/LKR-SDHI</i>                        | -0.1902        | 0.5987        |
| Free Ile        | AK activity with four effectors                     | 0.1271         | 0.7263        |
| Free Ile        | AK activity without effectors                       | 0.2958         | 0.4066        |
| Free Ile        | AK activity/HSDH activity with four effectors       | -0.1388        | 0.7021        |
| Free Ile        | AK activity/HSDH activity without effectors         | -0.1527        | 0.6736        |
| <b>Free Ile</b> | <b><i>AK1</i></b>                                   | <b>-0.4080</b> | <b>0.2418</b> |
| Free Ile        | <i>AK1+AK2</i>                                      | 0.1297         | 0.7209        |
| Free Ile        | <i>AK1+AK3</i>                                      | -0.3643        | 0.3007        |
| Free Ile        | <i>AK2</i>                                          | 0.2096         | 0.5611        |
| Free Ile        | <i>AK2+AK3</i>                                      | 0.2036         | 0.5726        |
| Free Ile        | <i>AK3</i>                                          | 0.0072         | 0.9842        |
| Free Ile        | <i>AK-HSDH1</i>                                     | 0.1238         | 0.7333        |
| Free Ile        | <i>AK-HSDH2</i>                                     | -0.0194        | 0.9575        |
| Free Ile        | <i>AK-HSDHs</i>                                     | 0.0599         | 0.8694        |
| Free Ile        | <i>AK-HSDHs+CGS1</i>                                | 0.2845         | 0.4256        |
| <b>Free Ile</b> | <b><i>AK-HSDHs+TS1</i></b>                          | <b>0.5377</b>  | <b>0.1089</b> |
| <b>Free Ile</b> | <b><i>AK-HSDHs+TS1+TD1</i></b>                      | <b>0.5597</b>  | <b>0.0925</b> |
| <b>Free Ile</b> | <b><i>AK-HSDHs+TS1+THAs</i></b>                     | <b>0.5517</b>  | <b>0.0983</b> |
| Free Ile        | <i>AKs</i>                                          | 0.1282         | 0.7242        |
| Free Ile        | <i>AKs/AK-HSDHs</i>                                 | 0.0821         | 0.8215        |
| Free Ile        | <i>AKs+AK-HSDHs</i>                                 | 0.1495         | 0.6801        |
| Free Ile        | <i>AKs+AK-HSDHs+CGS1</i>                            | 0.2490         | 0.4879        |
| Free Ile        | <i>AKs+AK-HSDHs+DHDPSs</i>                          | 0.1691         | 0.6405        |
| <b>Free Ile</b> | <b><i>AKs+AK-HSDHs+TS1</i></b>                      | <b>0.4369</b>  | <b>0.2068</b> |
| <b>Free Ile</b> | <b><i>AKs+AK-HSDHs+TS1+TD1</i></b>                  | <b>0.4609</b>  | <b>0.1800</b> |
| <b>Free Ile</b> | <b><i>AKs+AK-HSDHs+TS1+THAs</i></b>                 | <b>0.4422</b>  | <b>0.2006</b> |
| Free Ile        | <i>AKs+DHDPSs</i>                                   | 0.1494         | 0.6804        |
| <b>Free Ile</b> | <b><i>BCAT1</i></b>                                 | <b>-0.4659</b> | <b>0.1748</b> |
| <b>Free Ile</b> | <b>Biosynthetic genes analyzed</b>                  | <b>0.4900</b>  | <b>0.1506</b> |
| Free Ile        | Catabolic genes analyzed                            | 0.1736         | 0.6315        |

|                     |                                                      |                |               |
|---------------------|------------------------------------------------------|----------------|---------------|
| <b>Free Ile</b>     | <b>CGS1</b>                                          | <b>0.4694</b>  | <b>0.1711</b> |
| Free Ile            | CGS1/SAMSs                                           | 0.1711         | 0.6364        |
| Free Ile            | CGS1/TS1                                             | -0.3868        | 0.2695        |
| <b>Free Ile</b>     | <b>DHDPS1</b>                                        | <b>0.6690</b>  | <b>0.0344</b> |
| Free Ile            | DHDPS2                                               | 0.2548         | 0.4775        |
| <b>Free Ile</b>     | <b>DHDPSs</b>                                        | <b>0.5613</b>  | <b>0.0914</b> |
| Free Ile            | DHDPSs/AK-HSDHs                                      | 0.1187         | 0.7440        |
| Free Ile            | DHDPSs/LKR-SDH1                                      | 0.0651         | 0.8582        |
| <b>Free Ile</b>     | <b>Free Ala</b>                                      | <b>0.4919</b>  | <b>0.1487</b> |
| <b>Free Ile</b>     | <b>Free Arg</b>                                      | <b>0.4947</b>  | <b>0.1460</b> |
| <b>Free Ile</b>     | <b>Free Asn</b>                                      | <b>0.4443</b>  | <b>0.1983</b> |
| Free Ile            | Free Asp                                             | 0.2024         | 0.5750        |
| <b>Free Ile</b>     | <b>Free Cys</b>                                      | <b>0.4324</b>  | <b>0.2120</b> |
| Free Ile            | Free Gln                                             | 0.3515         | 0.3192        |
| Free Ile            | Free Glu                                             | 0.1440         | 0.6915        |
| Free Ile            | Free Gly                                             | 0.1316         | 0.7171        |
| <b>Free Ile</b>     | <b>Free His</b>                                      | <b>0.5512</b>  | <b>0.0986</b> |
| Free Ile            | HSDH activity with four effectors                    | 0.3951         | 0.2584        |
| <b>Free Ile</b>     | <b>HSDH activity without effectors</b>               | <b>0.4146</b>  | <b>0.2336</b> |
| Free Ile            | LKR-SDH1                                             | 0.2554         | 0.4764        |
| Free Ile            | Lys-sensitive AK activity                            | 0.0164         | 0.9641        |
| Free Ile            | Lys-sensitive AK activity/Thr-sensitive AK activity  | 0.3737         | 0.2875        |
| Free Ile            | SAMS1                                                | 0.3867         | 0.2696        |
| <b>Free Ile</b>     | <b>SAMS2</b>                                         | <b>0.7854</b>  | <b>0.0071</b> |
| Free Ile            | SAMS3                                                | -0.0518        | 0.8869        |
| Free Ile            | SAMS4                                                | 0.2817         | 0.4304        |
| Free Ile            | SAMSs                                                | 0.1685         | 0.6418        |
| <b>Free Ile</b>     | <b>TD1</b>                                           | <b>0.5921</b>  | <b>0.0713</b> |
| <b>Free Ile</b>     | <b>TD1/BCAT1</b>                                     | <b>0.4107</b>  | <b>0.2384</b> |
| Free Ile            | THA1                                                 | -0.0788        | 0.8287        |
| <b>Free Ile</b>     | <b>THA2</b>                                          | <b>0.7280</b>  | <b>0.0170</b> |
| <b>Free Ile</b>     | <b>THAs</b>                                          | <b>0.6990</b>  | <b>0.0245</b> |
| <b>Free Ile</b>     | <b>THAs+TD1</b>                                      | <b>0.7197</b>  | <b>0.0189</b> |
| Free Ile            | Thr-sensitive AK activity                            | -0.1850        | 0.6089        |
| <b>Free Ile</b>     | <b>TS1</b>                                           | <b>0.6774</b>  | <b>0.0314</b> |
| <b>Free Ile</b>     | <b>TS1/(THAs+TD1)</b>                                | <b>-0.4377</b> | <b>0.2059</b> |
| <b>Free Ile</b>     | <b>TS1/TD1</b>                                       | <b>-0.5386</b> | <b>0.1082</b> |
| Free Ile            | TS1/THAs                                             | 0.1413         | 0.6971        |
| Free Ile/Thr        | (AK-HSDHs+CGS1)/SAMSs                                | 0.0498         | 0.8914        |
| Free Ile/Thr        | (AK-HSDHs+TS1)/(THAs+TD1)                            | 0.2434         | 0.4980        |
| Free Ile/Thr        | (AK-HSDHs+TS1+TD1)/BCAT1                             | 0.0337         | 0.9264        |
| <b>Free Ile/Thr</b> | <b>(AKs+AK-HSDHs)/AK-HSDHs</b>                       | <b>-0.6946</b> | <b>0.0258</b> |
| <b>Free Ile/Thr</b> | <b>(AKs+AK-HSDHs+CGS1)/SAMSs</b>                     | <b>-0.6214</b> | <b>0.0551</b> |
| Free Ile/Thr        | (AKs+AK-HSDHs+DHDPSs)/LKR-SDH1                       | -0.0889        | 0.8071        |
| Free Ile/Thr        | (AKs+AK-HSDHs+TS1)/(THAs+TD1)                        | -0.1801        | 0.6186        |
| Free Ile/Thr        | (AKs+AK-HSDHs+TS1+TD1)/BCAT1                         | 0.0049         | 0.9894        |
| Free Ile/Thr        | (AKs+DHDPSs)/LKR-SDH1                                | -0.2670        | 0.4558        |
| <b>Free Ile/Thr</b> | <b>AK activity with four effectors</b>               | <b>-0.5285</b> | <b>0.1163</b> |
| <b>Free Ile/Thr</b> | <b>AK activity without effectors</b>                 | <b>-0.5260</b> | <b>0.1184</b> |
| <b>Free Ile/Thr</b> | <b>AK activity/HSDH activity with four effectors</b> | <b>-0.7412</b> | <b>0.0142</b> |
| <b>Free Ile/Thr</b> | <b>AK activity/HSDH activity without effectors</b>   | <b>-0.6581</b> | <b>0.0386</b> |
| Free Ile/Thr        | AK1                                                  | -0.0685        | 0.8509        |
| <b>Free Ile/Thr</b> | <b>AK1+AK2</b>                                       | <b>-0.7790</b> | <b>0.0079</b> |
| Free Ile/Thr        | AK1+AK3                                              | 0.0222         | 0.9514        |
| <b>Free Ile/Thr</b> | <b>AK2</b>                                           | <b>-0.7370</b> | <b>0.0150</b> |
| <b>Free Ile/Thr</b> | <b>AK2+AK3</b>                                       | <b>-0.6959</b> | <b>0.0254</b> |
| Free Ile/Thr        | AK3                                                  | 0.1224         | 0.7362        |
| Free Ile/Thr        | AK-HSDH1                                             | 0.3703         | 0.2921        |

|                     |                                     |                |                  |
|---------------------|-------------------------------------|----------------|------------------|
| Free Ile/Thr        | <i>AK-HSDH2</i>                     | 0.2988         | 0.4017           |
| <b>Free Ile/Thr</b> | <b><i>AK-HSDHs</i></b>              | <b>0.4028</b>  | <b>0.2485</b>    |
| Free Ile/Thr        | <i>AK-HSDHs+CGSI</i>                | 0.2903         | 0.4159           |
| Free Ile/Thr        | <i>AK-HSDHs+TSI</i>                 | 0.1818         | 0.6152           |
| Free Ile/Thr        | <i>AK-HSDHs+TSI+TDI</i>             | 0.1741         | 0.6305           |
| Free Ile/Thr        | <i>AK-HSDHs+TSI+THAs</i>            | 0.1710         | 0.6367           |
| <b>Free Ile/Thr</b> | <b><i>AKs</i></b>                   | <b>-0.7440</b> | <b>0.0136</b>    |
| <b>Free Ile/Thr</b> | <b><i>AKs/AK-HSDHs</i></b>          | <b>-0.6946</b> | <b>0.0258</b>    |
| <b>Free Ile/Thr</b> | <b><i>AKs+AK-HSDHs</i></b>          | <b>-0.6674</b> | <b>0.0350</b>    |
| <b>Free Ile/Thr</b> | <b><i>AKs+AK-HSDHs+CGSI</i></b>     | <b>-0.6049</b> | <b>0.0639</b>    |
| <b>Free Ile/Thr</b> | <b><i>AKs+AK-HSDHs+DHDPSs</i></b>   | <b>-0.6604</b> | <b>0.0377</b>    |
| <b>Free Ile/Thr</b> | <b><i>AKs+AK-HSDHs+TSI</i></b>      | <b>-0.4942</b> | <b>0.1465</b>    |
| <b>Free Ile/Thr</b> | <b><i>AKs+AK-HSDHs+TSI+TDI</i></b>  | <b>-0.4759</b> | <b>0.1644</b>    |
| <b>Free Ile/Thr</b> | <b><i>AKs+AK-HSDHs+TSI+THAs</i></b> | <b>-0.5002</b> | <b>0.1409</b>    |
| <b>Free Ile/Thr</b> | <b><i>AKs+DHDPSs</i></b>            | <b>-0.7399</b> | <b>0.0144</b>    |
| Free Ile/Thr        | <i>BCAT1</i>                        | -0.0479        | 0.8955           |
| <b>Free Ile/Thr</b> | <b>Biosynthetic genes analyzed</b>  | <b>-0.4263</b> | <b>0.2192</b>    |
| Free Ile/Thr        | Catabolic genes analyzed            | 0.2083         | 0.5637           |
| Free Ile/Thr        | <i>CGSI</i>                         | 0.1087         | 0.7651           |
| Free Ile/Thr        | <i>CGSI/SAMs</i>                    | -0.1830        | 0.6128           |
| Free Ile/Thr        | <i>CGSI/TSI</i>                     | -0.0690        | 0.8498           |
| Free Ile/Thr        | <i>DHDPS1</i>                       | -0.1768        | 0.6251           |
| Free Ile/Thr        | <i>DHDPS2</i>                       | 0.2038         | 0.5722           |
| Free Ile/Thr        | <i>DHDPSs</i>                       | 0.0214         | 0.9532           |
| <b>Free Ile/Thr</b> | <b><i>DHDPSs/AK-HSDHs</i></b>       | <b>-0.4014</b> | <b>0.2502</b>    |
| Free Ile/Thr        | <i>DHDPSs/LKR-SDH1</i>              | 0.3652         | 0.2994           |
| <b>Free Ile/Thr</b> | <b>Free (Lys+Met+Thr+Ile)/Asp</b>   | <b>-0.8292</b> | <b>0.0030</b>    |
| Free Ile/Thr        | Free Ala                            | 0.3179         | 0.3707           |
| Free Ile/Thr        | Free Arg                            | 0.0639         | 0.8608           |
| Free Ile/Thr        | Free Asn                            | 0.0371         | 0.9190           |
| Free Ile/Thr        | Free Asn+Asp                        | 0.1726         | 0.6336           |
| <b>Free Ile/Thr</b> | <b>Free Asn+Asp+Lys+Met+Thr+Ile</b> | <b>-0.6892</b> | <b>0.0275</b>    |
| <b>Free Ile/Thr</b> | <b>Free Asn+Asp+Lys+Thr+Ile</b>     | <b>-0.6918</b> | <b>0.0267</b>    |
| Free Ile/Thr        | Free Asp                            | 0.1852         | 0.6085           |
| <b>Free Ile/Thr</b> | <b>Free Asp+Lys+Met+Thr+Ile</b>     | <b>-0.7113</b> | <b>0.0211</b>    |
| <b>Free Ile/Thr</b> | <b>Free Cys</b>                     | <b>-0.7931</b> | <b>0.0062</b>    |
| Free Ile/Thr        | Free Gln                            | 0.0586         | 0.8723           |
| Free Ile/Thr        | Free Glu                            | -0.1395        | 0.7006           |
| Free Ile/Thr        | Free Gly                            | 0.1395         | 0.7008           |
| <b>Free Ile/Thr</b> | <b>Free Gly/Thr</b>                 | <b>0.8894</b>  | <b>0.0006</b>    |
| Free Ile/Thr        | Free Gly+Ile                        | 0.1206         | 0.7401           |
| Free Ile/Thr        | Free His                            | 0.0299         | 0.9346           |
| Free Ile/Thr        | Free Ile                            | -0.2762        | 0.4399           |
| Free Ile/Thr        | Free Leu                            | 0.2099         | 0.5605           |
| Free Ile/Thr        | Free Lys                            | 0.0452         | 0.9014           |
| <b>Free Ile/Thr</b> | <b>Free Lys/(Met+Thr+Ile)</b>       | <b>0.9804</b>  | <b>&lt;.0001</b> |
| <b>Free Ile/Thr</b> | <b>Free Lys/Thr</b>                 | <b>0.9837</b>  | <b>&lt;.0001</b> |
| <b>Free Ile/Thr</b> | <b>Free Lys+Met+Thr+Ile</b>         | <b>-0.8338</b> | <b>0.0027</b>    |
| Free Ile/Thr        | Free Met                            | 0.1667         | 0.6454           |
| <b>Free Ile/Thr</b> | <b>Free Met/Thr</b>                 | <b>0.9469</b>  | <b>&lt;.0001</b> |
| <b>Free Ile/Thr</b> | <b>Free Met+Thr+Ile</b>             | <b>-0.8343</b> | <b>0.0027</b>    |
| Free Ile/Thr        | Free Phe                            | 0.3469         | 0.3261           |
| Free Ile/Thr        | Free Pro                            | 0.0668         | 0.8545           |
| <b>Free Ile/Thr</b> | <b>Free Ser</b>                     | <b>0.5149</b>  | <b>0.1278</b>    |
| <b>Free Ile/Thr</b> | <b>Free Thr</b>                     | <b>-0.8340</b> | <b>0.0027</b>    |
| Free Ile/Thr        | Free Trp                            | 0.3808         | 0.2776           |
| Free Ile/Thr        | Free Tyr                            | 0.3038         | 0.3935           |
| Free Ile/Thr        | Free Val                            | 0.3857         | 0.2709           |

|                     |                                                            |                |               |
|---------------------|------------------------------------------------------------|----------------|---------------|
| Free Ile/Thr        | HSDH activity with four effectors                          | 0.2711         | 0.4486        |
| Free Ile/Thr        | HSDH activity without effectors                            | 0.2419         | 0.5008        |
| Free Ile/Thr        | <i>LKR-SDHI</i>                                            | -0.3050        | 0.3914        |
| <b>Free Ile/Thr</b> | <b>Lys-sensitive AK activity</b>                           | <b>-0.6586</b> | <b>0.0384</b> |
| <b>Free Ile/Thr</b> | <b>Lys-sensitive AK activity/Thr-sensitive AK activity</b> | <b>-0.6391</b> | <b>0.0467</b> |
| Free Ile/Thr        | <i>SAMS1</i>                                               | 0.3076         | 0.3873        |
| Free Ile/Thr        | <i>SAMS2</i>                                               | -0.0852        | 0.8149        |
| Free Ile/Thr        | <i>SAMS3</i>                                               | 0.0807         | 0.8247        |
| Free Ile/Thr        | <i>SAMS4</i>                                               | 0.2611         | 0.4662        |
| Free Ile/Thr        | <i>SAMSs</i>                                               | 0.2111         | 0.5583        |
| Free Ile/Thr        | <i>TD1</i>                                                 | 0.0735         | 0.8401        |
| Free Ile/Thr        | <i>TD1/BCAT1</i>                                           | 0.0429         | 0.9063        |
| Free Ile/Thr        | <i>THA1</i>                                                | 0.1669         | 0.6450        |
| <b>Free Ile/Thr</b> | <b><i>THA2</i></b>                                         | <b>-0.5484</b> | <b>0.1007</b> |
| <b>Free Ile/Thr</b> | <b><i>THAs</i></b>                                         | <b>-0.5894</b> | <b>0.0730</b> |
| Free Ile/Thr        | <i>THAs+TD1</i>                                            | -0.0374        | 0.9184        |
| <b>Free Ile/Thr</b> | <b>Thr-sensitive AK activity</b>                           | <b>0.7050</b>  | <b>0.0228</b> |
| Free Ile/Thr        | Total free AAs                                             | -0.1175        | 0.7464        |
| Free Ile/Thr        | <i>TS1</i>                                                 | 0.0611         | 0.8669        |
| Free Ile/Thr        | <i>TS1/(THAs+TD1)</i>                                      | 0.2103         | 0.5598        |
| Free Ile/Thr        | <i>TS1/TD1</i>                                             | 0.1671         | 0.6444        |
| Free Ile/Thr        | <i>TS1/THAs</i>                                            | 0.3504         | 0.3209        |
| Free Leu            | <i>(AK-HSDHs+CGS1)/SAMSs</i>                               | -0.0832        | 0.8192        |
| <b>Free Leu</b>     | <b><i>(AK-HSDHs+TS1)/(THAs+TD1)</i></b>                    | <b>-0.5010</b> | <b>0.1402</b> |
| <b>Free Leu</b>     | <b><i>(AK-HSDHs+TS1+TD1)/BCAT1</i></b>                     | <b>0.7077</b>  | <b>0.0220</b> |
| Free Leu            | <i>(AKs+AK-HSDHs)/AK-HSDHs</i>                             | -0.3139        | 0.3772        |
| Free Leu            | <i>(AKs+AK-HSDHs+CGS1)/SAMSs</i>                           | -0.2356        | 0.5123        |
| Free Leu            | <i>(AKs+AK-HSDHs+DHDPSs)/LKR-SDHI</i>                      | 0.0436         | 0.9048        |
| <b>Free Leu</b>     | <b><i>(AKs+AK-HSDHs+TS1)/(THAs+TD1)</i></b>                | <b>-0.6386</b> | <b>0.0469</b> |
| <b>Free Leu</b>     | <b><i>(AKs+AK-HSDHs+TS1+TD1)/BCAT1</i></b>                 | <b>0.6999</b>  | <b>0.0242</b> |
| Free Leu            | <i>(AKs+DHDPSs)/LKR-SDHI</i>                               | -0.0371        | 0.9190        |
| Free Leu            | AK activity with four effectors                            | -0.0671        | 0.8540        |
| Free Leu            | AK activity without effectors                              | -0.1962        | 0.5870        |
| Free Leu            | AK activity/HSDH activity with four effectors              | -0.3338        | 0.3459        |
| Free Leu            | AK activity/HSDH activity without effectors                | -0.2694        | 0.4517        |
| Free Leu            | <i>AK1</i>                                                 | -0.1406        | 0.6984        |
| Free Leu            | <i>AK1+AK2</i>                                             | -0.0722        | 0.8428        |
| Free Leu            | <i>AK1+AK3</i>                                             | -0.0941        | 0.7961        |
| Free Leu            | <i>AK2</i>                                                 | -0.0398        | 0.9131        |
| Free Leu            | <i>AK2+AK3</i>                                             | -0.0316        | 0.9309        |
| Free Leu            | <i>AK3</i>                                                 | 0.0472         | 0.8970        |
| Free Leu            | <i>AK-HSDH1</i>                                            | 0.0722         | 0.8429        |
| <b>Free Leu</b>     | <b><i>AK-HSDH2</i></b>                                     | <b>0.6243</b>  | <b>0.0537</b> |
| <b>Free Leu</b>     | <b><i>AK-HSDHs</i></b>                                     | <b>0.4506</b>  | <b>0.1912</b> |
| <b>Free Leu</b>     | <b><i>AK-HSDHs+CGS1</i></b>                                | <b>0.5980</b>  | <b>0.0679</b> |
| <b>Free Leu</b>     | <b><i>AK-HSDHs+TS1</i></b>                                 | <b>0.6289</b>  | <b>0.0514</b> |
| <b>Free Leu</b>     | <b><i>AK-HSDHs+TS1+TD1</i></b>                             | <b>0.6678</b>  | <b>0.0348</b> |
| <b>Free Leu</b>     | <b><i>AK-HSDHs+TS1+THAs</i></b>                            | <b>0.6299</b>  | <b>0.0510</b> |
| Free Leu            | <i>AKs</i>                                                 | -0.0628        | 0.8631        |
| Free Leu            | <i>AKs/AK-HSDHs</i>                                        | -0.3139        | 0.3772        |
| Free Leu            | <i>AKs+AK-HSDHs</i>                                        | 0.0540         | 0.8821        |
| Free Leu            | <i>AKs+AK-HSDHs+CGS1</i>                                   | 0.1971         | 0.5851        |
| Free Leu            | <i>AKs+AK-HSDHs+DHDPSs</i>                                 | 0.0862         | 0.8127        |
| Free Leu            | <i>AKs+AK-HSDHs+TS1</i>                                    | 0.3366         | 0.3417        |
| Free Leu            | <i>AKs+AK-HSDHs+TS1+TD1</i>                                | 0.3802         | 0.2785        |
| Free Leu            | <i>AKs+AK-HSDHs+TS1+THAs</i>                               | 0.3343         | 0.3451        |
| Free Leu            | <i>AKs+DHDPSs</i>                                          | -0.0283        | 0.9381        |



|                 |                                                     |                |               |
|-----------------|-----------------------------------------------------|----------------|---------------|
| <b>Free Leu</b> | <i>BCAT1</i>                                        | <b>-0.8518</b> | <b>0.0018</b> |
| <b>Free Leu</b> | <b>Biosynthetic genes analyzed</b>                  | <b>0.4377</b>  | <b>0.2058</b> |
| <b>Free Leu</b> | <b>Catabolic genes analyzed</b>                     | <b>0.5547</b>  | <b>0.0961</b> |
| <b>Free Leu</b> | <i>CGS1</i>                                         | <b>0.6417</b>  | <b>0.0455</b> |
| Free Leu        | <i>CGS1/SAMSs</i>                                   | -0.2042        | 0.5715        |
| Free Leu        | <i>CGS1/TS1</i>                                     | -0.1810        | 0.6168        |
| <b>Free Leu</b> | <i>DHDPS1</i>                                       | <b>0.5491</b>  | <b>0.1002</b> |
| <b>Free Leu</b> | <i>DHDPS2</i>                                       | <b>0.7661</b>  | <b>0.0098</b> |
| <b>Free Leu</b> | <i>DHDPSs</i>                                       | <b>0.8498</b>  | <b>0.0019</b> |
| Free Leu        | <i>DHDPSs/AK-HSDHs</i>                              | -0.2506        | 0.4849        |
| <b>Free Leu</b> | <i>DHDPSs/LKR-SDHI</i>                              | <b>0.5281</b>  | <b>0.1166</b> |
| <b>Free Leu</b> | <b>Free Ala</b>                                     | <b>0.8538</b>  | <b>0.0017</b> |
| <b>Free Leu</b> | <b>Free Arg</b>                                     | <b>0.8204</b>  | <b>0.0036</b> |
| <b>Free Leu</b> | <b>Free Asn</b>                                     | <b>0.8901</b>  | <b>0.0006</b> |
| <b>Free Leu</b> | <b>Free Asp</b>                                     | <b>0.7282</b>  | <b>0.0169</b> |
| Free Leu        | Free Cys                                            | 0.1520         | 0.6750        |
| <b>Free Leu</b> | <b>Free Gln</b>                                     | <b>0.8413</b>  | <b>0.0023</b> |
| <b>Free Leu</b> | <b>Free Glu</b>                                     | <b>0.5385</b>  | <b>0.1083</b> |
| <b>Free Leu</b> | <b>Free Gly</b>                                     | <b>0.6373</b>  | <b>0.0475</b> |
| <b>Free Leu</b> | <b>Free His</b>                                     | <b>0.9195</b>  | <b>0.0002</b> |
| <b>Free Leu</b> | <b>Free Ile</b>                                     | <b>0.5983</b>  | <b>0.0677</b> |
| <b>Free Leu</b> | <b>HSDH activity with four effectors</b>            | <b>0.5628</b>  | <b>0.0903</b> |
| Free Leu        | HSDH activity without effectors                     | 0.2941         | 0.4095        |
| Free Leu        | <i>LKR-SDHI</i>                                     | -0.1811        | 0.6165        |
| <b>Free Leu</b> | <b>Lys-sensitive AK activity</b>                    | <b>-0.5077</b> | <b>0.1341</b> |
| Free Leu        | Lys-sensitive AK activity/Thr-sensitive AK activity | -0.1851        | 0.6087        |
| <b>Free Leu</b> | <i>SAMS1</i>                                        | <b>0.7818</b>  | <b>0.0076</b> |
| <b>Free Leu</b> | <i>SAMS2</i>                                        | <b>0.7420</b>  | <b>0.0140</b> |
| Free Leu        | <i>SAMS3</i>                                        | 0.2121         | 0.5564        |
| <b>Free Leu</b> | <i>SAMS4</i>                                        | <b>0.6069</b>  | <b>0.0628</b> |
| <b>Free Leu</b> | <i>SAMSs</i>                                        | <b>0.5538</b>  | <b>0.0967</b> |
| <b>Free Leu</b> | <i>TD1</i>                                          | <b>0.8626</b>  | <b>0.0013</b> |
| <b>Free Leu</b> | <i>TD1/BCAT1</i>                                    | <b>0.7534</b>  | <b>0.0119</b> |
| Free Leu        | <i>THA1</i>                                         | -0.3242        | 0.3608        |
| Free Leu        | <i>THA2</i>                                         | 0.1549         | 0.6692        |
| Free Leu        | <i>THAs</i>                                         | 0.1234         | 0.7341        |
| <b>Free Leu</b> | <i>THAs+TD1</i>                                     | <b>0.8593</b>  | <b>0.0014</b> |
| Free Leu        | Thr-sensitive AK activity                           | 0.0912         | 0.8021        |
| <b>Free Leu</b> | <i>TS1</i>                                          | <b>0.6245</b>  | <b>0.0536</b> |
| <b>Free Leu</b> | <i>TS1/(THAs+TD1)</i>                               | <b>-0.6106</b> | <b>0.0608</b> |
| <b>Free Leu</b> | <i>TS1/TD1</i>                                      | <b>-0.6605</b> | <b>0.0376</b> |
| <b>Free Leu</b> | <i>TS1/THAs</i>                                     | <b>0.5376</b>  | <b>0.1090</b> |
| Free Lys        | <i>(AK-HSDHs+CGS1)/SAMSs</i>                        | 0.0400         | 0.9127        |
| <b>Free Lys</b> | <i>(AK-HSDHs+TS1)/(THAs+TD1)</i>                    | <b>-0.5708</b> | <b>0.0848</b> |
| <b>Free Lys</b> | <i>(AK-HSDHs+TS1+TD1)/BCAT1</i>                     | <b>0.7606</b>  | <b>0.0106</b> |
| Free Lys        | <i>(AKs+AK-HSDHs)/AK-HSDHs</i>                      | -0.1071        | 0.7683        |
| Free Lys        | <i>(AKs+AK-HSDHs+CGS1)/SAMSs</i>                    | -0.0342        | 0.9253        |
| Free Lys        | <i>(AKs+AK-HSDHs+DHDPSs)/LKR-SDHI</i>               | 0.0487         | 0.8937        |
| <b>Free Lys</b> | <i>(AKs+AK-HSDHs+TS1)/(THAs+TD1)</i>                | <b>-0.5852</b> | <b>0.0756</b> |
| <b>Free Lys</b> | <i>(AKs+AK-HSDHs+TS1+TD1)/BCAT1</i>                 | <b>0.7622</b>  | <b>0.0104</b> |
| Free Lys        | <i>(AKs+DHDPSs)/LKR-SDHI</i>                        | 0.0232         | 0.9493        |
| Free Lys        | AK activity with four effectors                     | 0.0058         | 0.9872        |
| Free Lys        | AK activity without effectors                       | -0.1483        | 0.6826        |
| Free Lys        | AK activity/HSDH activity with four effectors       | -0.2127        | 0.5552        |
| Free Lys        | AK activity/HSDH activity without effectors         | -0.1233        | 0.7344        |
| Free Lys        | <i>AK1</i>                                          | -0.1522        | 0.6747        |
| Free Lys        | <i>AK1+AK2</i>                                      | 0.1136         | 0.7547        |
| Free Lys        | <i>AK1+AK3</i>                                      | -0.1296        | 0.7213        |

|                 |                                                     |                |                  |
|-----------------|-----------------------------------------------------|----------------|------------------|
| Free Lys        | AK2                                                 | 0.1419         | 0.6957           |
| Free Lys        | AK2+AK3                                             | 0.1394         | 0.7010           |
| Free Lys        | AK3                                                 | 0.0155         | 0.9662           |
| Free Lys        | AK-HSDH1                                            | -0.1182        | 0.7450           |
| <b>Free Lys</b> | <b>AK-HSDH2</b>                                     | <b>0.5536</b>  | <b>0.0968</b>    |
| Free Lys        | AK-HSDHs                                            | 0.2979         | 0.4031           |
| <b>Free Lys</b> | <b>AK-HSDHs+CGS1</b>                                | <b>0.4971</b>  | <b>0.1438</b>    |
| <b>Free Lys</b> | <b>AK-HSDHs+TS1</b>                                 | <b>0.4965</b>  | <b>0.1444</b>    |
| <b>Free Lys</b> | <b>AK-HSDHs+TS1+TD1</b>                             | <b>0.5372</b>  | <b>0.1093</b>    |
| <b>Free Lys</b> | <b>AK-HSDHs+TS1+THAs</b>                            | <b>0.5004</b>  | <b>0.1407</b>    |
| Free Lys        | AKs                                                 | 0.1142         | 0.7535           |
| Free Lys        | AKs/AK-HSDHs                                        | -0.1071        | 0.7683           |
| Free Lys        | AKs+AK-HSDHs                                        | 0.1976         | 0.5842           |
| Free Lys        | AKs+AK-HSDHs+CGS1                                   | 0.3270         | 0.3564           |
| Free Lys        | AKs+AK-HSDHs+DHDPSs                                 | 0.2253         | 0.5314           |
| Free Lys        | AKs+AK-HSDHs+TS1                                    | 0.3991         | 0.2532           |
| <b>Free Lys</b> | <b>AKs+AK-HSDHs+TS1+TD1</b>                         | <b>0.4359</b>  | <b>0.2079</b>    |
| Free Lys        | AKs+AK-HSDHs+TS1+THAs                               | 0.3987         | 0.2538           |
| Free Lys        | AKs+DHDPSs                                          | 0.1447         | 0.6900           |
| <b>Free Lys</b> | <b>BCAT1</b>                                        | <b>-0.8902</b> | <b>0.0006</b>    |
| <b>Free Lys</b> | <b>Biosynthetic genes analyzed</b>                  | <b>0.4875</b>  | <b>0.1529</b>    |
| <b>Free Lys</b> | <b>Catabolic genes analyzed</b>                     | <b>0.4098</b>  | <b>0.2396</b>    |
| <b>Free Lys</b> | <b>CGS1</b>                                         | <b>0.6166</b>  | <b>0.0576</b>    |
| Free Lys        | CGS1/SAMSs                                          | -0.0288        | 0.9370           |
| Free Lys        | CGS1/TS1                                            | -0.0407        | 0.9110           |
| <b>Free Lys</b> | <b>DHDPS1</b>                                       | <b>0.5311</b>  | <b>0.1142</b>    |
| <b>Free Lys</b> | <b>DHDPS2</b>                                       | <b>0.6690</b>  | <b>0.0344</b>    |
| <b>Free Lys</b> | <b>DHDPSs</b>                                       | <b>0.7704</b>  | <b>0.0091</b>    |
| Free Lys        | DHDPSs/AK-HSDHs                                     | -0.1031        | 0.7769           |
| Free Lys        | DHDPSs/LKR-SDH1                                     | 0.3876         | 0.2684           |
| <b>Free Lys</b> | <b>Free Ala</b>                                     | <b>0.7653</b>  | <b>0.0099</b>    |
| <b>Free Lys</b> | <b>Free Arg</b>                                     | <b>0.8426</b>  | <b>0.0022</b>    |
| <b>Free Lys</b> | <b>Free Asn</b>                                     | <b>0.8832</b>  | <b>0.0007</b>    |
| <b>Free Lys</b> | <b>Free Asp</b>                                     | <b>0.7091</b>  | <b>0.0217</b>    |
| Free Lys        | Free Cys                                            | 0.2438         | 0.4973           |
| <b>Free Lys</b> | <b>Free Gln</b>                                     | <b>0.8201</b>  | <b>0.0037</b>    |
| <b>Free Lys</b> | <b>Free Glu</b>                                     | <b>0.6085</b>  | <b>0.0619</b>    |
| <b>Free Lys</b> | <b>Free Gly</b>                                     | <b>0.5459</b>  | <b>0.1026</b>    |
| <b>Free Lys</b> | <b>Free His</b>                                     | <b>0.9154</b>  | <b>0.0002</b>    |
| <b>Free Lys</b> | <b>Free Ile</b>                                     | <b>0.6085</b>  | <b>0.0619</b>    |
| <b>Free Lys</b> | <b>Free Leu</b>                                     | <b>0.9672</b>  | <b>&lt;.0001</b> |
| <b>Free Lys</b> | <b>HSDH activity with four effectors</b>            | <b>0.5035</b>  | <b>0.1379</b>    |
| Free Lys        | HSDH activity without effectors                     | 0.1982         | 0.5831           |
| Free Lys        | LKR-SDH1                                            | -0.1051        | 0.7726           |
| Free Lys        | Lys-sensitive AK activity                           | -0.3984        | 0.2541           |
| Free Lys        | Lys-sensitive AK activity/Thr-sensitive AK activity | -0.0016        | 0.9964           |
| <b>Free Lys</b> | <b>SAMS1</b>                                        | <b>0.7123</b>  | <b>0.0208</b>    |
| <b>Free Lys</b> | <b>SAMS2</b>                                        | <b>0.7001</b>  | <b>0.0242</b>    |
| Free Lys        | SAMS3                                               | 0.0846         | 0.8163           |
| <b>Free Lys</b> | <b>SAMS4</b>                                        | <b>0.4542</b>  | <b>0.1873</b>    |
| <b>Free Lys</b> | <b>SAMSs</b>                                        | <b>0.4091</b>  | <b>0.2404</b>    |
| <b>Free Lys</b> | <b>TD1</b>                                          | <b>0.7818</b>  | <b>0.0076</b>    |
| <b>Free Lys</b> | <b>TD1/BCAT1</b>                                    | <b>0.7991</b>  | <b>0.0055</b>    |
| Free Lys        | THA1                                                | -0.3406        | 0.3355           |
| Free Lys        | THA2                                                | 0.2950         | 0.4080           |
| Free Lys        | THAs                                                | 0.2760         | 0.4402           |
| <b>Free Lys</b> | <b>THAs+TD1</b>                                     | <b>0.8081</b>  | <b>0.0047</b>    |
| Free Lys        | Thr-sensitive AK activity                           | -0.1153        | 0.7512           |

|                               |                                                      |                |               |
|-------------------------------|------------------------------------------------------|----------------|---------------|
| <b>Free Lys</b>               | <i>TS1</i>                                           | <b>0.5186</b>  | <b>0.1246</b> |
| <b>Free Lys</b>               | <i>TS1/(THAs+TD1)</i>                                | <b>-0.6673</b> | <b>0.0350</b> |
| <b>Free Lys</b>               | <i>TS1/TD1</i>                                       | <b>-0.6834</b> | <b>0.0294</b> |
| Free Lys                      | <i>TS1/THAs</i>                                      | 0.3530         | 0.3171        |
| Free Lys/(Met+Thr+Ile)        | <i>(AK-HSDHs+CGS1)/SAMSs</i>                         | 0.0020         | 0.9955        |
| Free Lys/(Met+Thr+Ile)        | <i>(AK-HSDHs+TS1)/(THAs+TD1)</i>                     | 0.1611         | 0.6567        |
| Free Lys/(Met+Thr+Ile)        | <i>(AK-HSDHs+TS1+TD1)/BCAT1</i>                      | 0.1665         | 0.6456        |
| <b>Free Lys/(Met+Thr+Ile)</b> | <i>(AKs+AK-HSDHs)/AK-HSDHs</i>                       | <b>-0.7191</b> | <b>0.0191</b> |
| <b>Free Lys/(Met+Thr+Ile)</b> | <i>(AKs+AK-HSDHs+CGS1)/SAMSs</i>                     | <b>-0.6321</b> | <b>0.0499</b> |
| Free Lys/(Met+Thr+Ile)        | <i>(AKs+AK-HSDHs+DHDPSs)/LKR-SDHI</i>                | -0.0342        | 0.9253        |
| Free Lys/(Met+Thr+Ile)        | <i>(AKs+AK-HSDHs+TS1)/(THAs+TD1)</i>                 | -0.2465        | 0.4924        |
| Free Lys/(Met+Thr+Ile)        | <i>(AKs+AK-HSDHs+TS1+TD1)/BCAT1</i>                  | 0.1397         | 0.7004        |
| Free Lys/(Met+Thr+Ile)        | <i>(AKs+DHDPSs)/LKR-SDHI</i>                         | -0.2139        | 0.5529        |
| <b>Free Lys/(Met+Thr+Ile)</b> | <b>AK activity with four effectors</b>               | <b>-0.5071</b> | <b>0.1347</b> |
| <b>Free Lys/(Met+Thr+Ile)</b> | <b>AK activity without effectors</b>                 | <b>-0.5678</b> | <b>0.0868</b> |
| <b>Free Lys/(Met+Thr+Ile)</b> | <b>AK activity/HSDH activity with four effectors</b> | <b>-0.7320</b> | <b>0.0161</b> |
| <b>Free Lys/(Met+Thr+Ile)</b> | <b>AK activity/HSDH activity without effectors</b>   | <b>-0.6433</b> | <b>0.0448</b> |
| Free Lys/(Met+Thr+Ile)        | <i>AK1</i>                                           | -0.0194        | 0.9575        |
| <b>Free Lys/(Met+Thr+Ile)</b> | <b>AK1+AK2</b>                                       | <b>-0.7303</b> | <b>0.0165</b> |
| Free Lys/(Met+Thr+Ile)        | <i>AK1+AK3</i>                                       | 0.0499         | 0.8911        |
| <b>Free Lys/(Met+Thr+Ile)</b> | <b>AK2</b>                                           | <b>-0.7000</b> | <b>0.0242</b> |
| <b>Free Lys/(Met+Thr+Ile)</b> | <b>AK2+AK3</b>                                       | <b>-0.6638</b> | <b>0.0364</b> |
| Free Lys/(Met+Thr+Ile)        | <i>AK3</i>                                           | 0.1003         | 0.7828        |
| Free Lys/(Met+Thr+Ile)        | <i>AK-HSDH1</i>                                      | 0.3357         | 0.3429        |
| <b>Free Lys/(Met+Thr+Ile)</b> | <b>AK-HSDH2</b>                                      | <b>0.4355</b>  | <b>0.2083</b> |
| <b>Free Lys/(Met+Thr+Ile)</b> | <b>AK-HSDHs</b>                                      | <b>0.4729</b>  | <b>0.1675</b> |
| Free Lys/(Met+Thr+Ile)        | <i>AK-HSDHs+CGS1</i>                                 | 0.3716         | 0.2904        |
| Free Lys/(Met+Thr+Ile)        | <i>AK-HSDHs+TS1</i>                                  | 0.2341         | 0.5151        |
| Free Lys/(Met+Thr+Ile)        | <i>AK-HSDHs+TS1+TD1</i>                              | 0.2339         | 0.5154        |
| Free Lys/(Met+Thr+Ile)        | <i>AK-HSDHs+TS1+THAs</i>                             | 0.2222         | 0.5371        |
| <b>Free Lys/(Met+Thr+Ile)</b> | <b>AKs</b>                                           | <b>-0.7001</b> | <b>0.0242</b> |
| <b>Free Lys/(Met+Thr+Ile)</b> | <b>AKs/AK-HSDHs</b>                                  | <b>-0.7191</b> | <b>0.0191</b> |
| <b>Free Lys/(Met+Thr+Ile)</b> | <b>AKs+AK-HSDHs</b>                                  | <b>-0.6031</b> | <b>0.0649</b> |
| <b>Free Lys/(Met+Thr+Ile)</b> | <b>AKs+AK-HSDHs+CGS1</b>                             | <b>-0.5266</b> | <b>0.1179</b> |
| <b>Free Lys/(Met+Thr+Ile)</b> | <b>AKs+AK-HSDHs+DHDPSs</b>                           | <b>-0.5915</b> | <b>0.0717</b> |
| <b>Free Lys/(Met+Thr+Ile)</b> | <b>AKs+AK-HSDHs+TS1</b>                              | <b>-0.4263</b> | <b>0.2192</b> |
| <b>Free Lys/(Met+Thr+Ile)</b> | <b>AKs+AK-HSDHs+TS1+TD1</b>                          | <b>-0.4026</b> | <b>0.2488</b> |
| <b>Free Lys/(Met+Thr+Ile)</b> | <b>AKs+AK-HSDHs+TS1+THAs</b>                         | <b>-0.4332</b> | <b>0.2111</b> |
| <b>Free Lys/(Met+Thr+Ile)</b> | <b>AKs+DHDPSs</b>                                    | <b>-0.6907</b> | <b>0.0270</b> |
| Free Lys/(Met+Thr+Ile)        | <i>BCAT1</i>                                         | -0.1949        | 0.5895        |
| Free Lys/(Met+Thr+Ile)        | Biosynthetic genes analyzed                          | -0.3479        | 0.3246        |
| Free Lys/(Met+Thr+Ile)        | Catabolic genes analyzed                             | 0.3089         | 0.3851        |
| Free Lys/(Met+Thr+Ile)        | <i>CGS1</i>                                          | 0.1873         | 0.6043        |
| Free Lys/(Met+Thr+Ile)        | <i>CGS1/SAMSs</i>                                    | -0.2499        | 0.4862        |
| Free Lys/(Met+Thr+Ile)        | <i>CGS1/TS1</i>                                      | -0.0377        | 0.9176        |
| Free Lys/(Met+Thr+Ile)        | <i>DHDPS1</i>                                        | -0.1163        | 0.7491        |
| Free Lys/(Met+Thr+Ile)        | <i>DHDPS2</i>                                        | 0.3375         | 0.3403        |
| Free Lys/(Met+Thr+Ile)        | <i>DHDPSs</i>                                        | 0.1521         | 0.6748        |
| <b>Free Lys/(Met+Thr+Ile)</b> | <b>DHDPSs/AK-HSDHs</b>                               | <b>-0.4530</b> | <b>0.1886</b> |
| <b>Free Lys/(Met+Thr+Ile)</b> | <b>DHDPSs/LKR-SDHI</b>                               | <b>0.4583</b>  | <b>0.1828</b> |
| <b>Free Lys/(Met+Thr+Ile)</b> | <b>Free (Lys+Met+Thr+Ile)/Asp</b>                    | <b>-0.8918</b> | <b>0.0005</b> |
| <b>Free Lys/(Met+Thr+Ile)</b> | <b>Free Ala</b>                                      | <b>0.4253</b>  | <b>0.2205</b> |
| Free Lys/(Met+Thr+Ile)        | Free Arg                                             | 0.1946         | 0.5900        |
| Free Lys/(Met+Thr+Ile)        | Free Asn                                             | 0.1953         | 0.5887        |
| Free Lys/(Met+Thr+Ile)        | Free Asn+Asp                                         | 0.3149         | 0.3755        |
| <b>Free Lys/(Met+Thr+Ile)</b> | <b>Free Asn+Asp+Lys+Met+Thr+Ile</b>                  | <b>-0.6425</b> | <b>0.0451</b> |
| <b>Free Lys/(Met+Thr+Ile)</b> | <b>Free Asn+Asp+Lys+Thr+Ile</b>                      | <b>-0.6463</b> | <b>0.0435</b> |

|                               |                                                            |                |               |
|-------------------------------|------------------------------------------------------------|----------------|---------------|
| Free Lys/(Met+Thr+Ile)        | Free Asp                                                   | 0.3224         | 0.3636        |
| <b>Free Lys/(Met+Thr+Ile)</b> | <b>Free Asp+Lys+Met+Thr+Ile</b>                            | <b>-0.6744</b> | <b>0.0324</b> |
| <b>Free Lys/(Met+Thr+Ile)</b> | <b>Free Cys</b>                                            | <b>-0.7243</b> | <b>0.0178</b> |
| Free Lys/(Met+Thr+Ile)        | Free Gln                                                   | 0.2206         | 0.5402        |
| Free Lys/(Met+Thr+Ile)        | Free Glu                                                   | -0.0147        | 0.9679        |
| Free Lys/(Met+Thr+Ile)        | Free Gly                                                   | 0.2816         | 0.4305        |
| Free Lys/(Met+Thr+Ile)        | Free Gly+Ile                                               | 0.2630         | 0.4629        |
| Free Lys/(Met+Thr+Ile)        | Free His                                                   | 0.1760         | 0.6267        |
| Free Lys/(Met+Thr+Ile)        | Free Ile                                                   | -0.2492        | 0.4875        |
| Free Lys/(Met+Thr+Ile)        | Free Leu                                                   | 0.3549         | 0.3143        |
| Free Lys/(Met+Thr+Ile)        | Free Lys                                                   | 0.1990         | 0.5815        |
| <b>Free Lys/(Met+Thr+Ile)</b> | <b>Free Lys+Met+Thr+Ile</b>                                | <b>-0.8534</b> | <b>0.0017</b> |
| Free Lys/(Met+Thr+Ile)        | Free Met                                                   | 0.2886         | 0.4187        |
| <b>Free Lys/(Met+Thr+Ile)</b> | <b>Free Met+Thr+Ile</b>                                    | <b>-0.8595</b> | <b>0.0014</b> |
| <b>Free Lys/(Met+Thr+Ile)</b> | <b>Free Phe</b>                                            | <b>0.4719</b>  | <b>0.1685</b> |
| Free Lys/(Met+Thr+Ile)        | Free Pro                                                   | 0.2422         | 0.5001        |
| <b>Free Lys/(Met+Thr+Ile)</b> | <b>Free Ser</b>                                            | <b>0.6119</b>  | <b>0.0601</b> |
| <b>Free Lys/(Met+Thr+Ile)</b> | <b>Free Thr</b>                                            | <b>-0.8621</b> | <b>0.0013</b> |
| <b>Free Lys/(Met+Thr+Ile)</b> | <b>Free Trp</b>                                            | <b>0.5125</b>  | <b>0.1298</b> |
| Free Lys/(Met+Thr+Ile)        | Free Tyr                                                   | 0.3874         | 0.2687        |
| <b>Free Lys/(Met+Thr+Ile)</b> | <b>Free Val</b>                                            | <b>0.4576</b>  | <b>0.1836</b> |
| Free Lys/(Met+Thr+Ile)        | HSDH activity with four effectors                          | 0.3405         | 0.3356        |
| Free Lys/(Met+Thr+Ile)        | HSDH activity without effectors                            | 0.2418         | 0.5009        |
| Free Lys/(Met+Thr+Ile)        | <i>LKR-SDHI</i>                                            | -0.3659        | 0.2984        |
| <b>Free Lys/(Met+Thr+Ile)</b> | <b>Lys-sensitive AK activity</b>                           | <b>-0.7232</b> | <b>0.0181</b> |
| <b>Free Lys/(Met+Thr+Ile)</b> | <b>Lys-sensitive AK activity/Thr-sensitive AK activity</b> | <b>-0.6860</b> | <b>0.0285</b> |
| <b>Free Lys/(Met+Thr+Ile)</b> | <b>SAMS1</b>                                               | <b>0.4122</b>  | <b>0.2366</b> |
| Free Lys/(Met+Thr+Ile)        | <i>SAMS2</i>                                               | -0.0149        | 0.9674        |
| Free Lys/(Met+Thr+Ile)        | <i>SAMS3</i>                                               | 0.1471         | 0.6850        |
| Free Lys/(Met+Thr+Ile)        | <i>SAMS4</i>                                               | 0.3445         | 0.3296        |
| Free Lys/(Met+Thr+Ile)        | <i>SAMSs</i>                                               | 0.3121         | 0.3799        |
| Free Lys/(Met+Thr+Ile)        | <i>TD1</i>                                                 | 0.1931         | 0.5930        |
| Free Lys/(Met+Thr+Ile)        | <i>TD1/BCAT1</i>                                           | 0.1844         | 0.6100        |
| Free Lys/(Met+Thr+Ile)        | <i>THA1</i>                                                | 0.0782         | 0.8300        |
| <b>Free Lys/(Met+Thr+Ile)</b> | <b>THA2</b>                                                | <b>-0.5718</b> | <b>0.0842</b> |
| <b>Free Lys/(Met+Thr+Ile)</b> | <b>THAs</b>                                                | <b>-0.6148</b> | <b>0.0586</b> |
| Free Lys/(Met+Thr+Ile)        | <i>THAs+TD1</i>                                            | 0.0714         | 0.8447        |
| <b>Free Lys/(Met+Thr+Ile)</b> | <b>Thr-sensitive AK activity</b>                           | <b>0.6639</b>  | <b>0.0363</b> |
| Free Lys/(Met+Thr+Ile)        | Total free AAs                                             | 0.0284         | 0.9380        |
| Free Lys/(Met+Thr+Ile)        | <i>TS1</i>                                                 | 0.0985         | 0.7867        |
| Free Lys/(Met+Thr+Ile)        | <i>TS1/(THAs+TD1)</i>                                      | 0.0943         | 0.7956        |
| Free Lys/(Met+Thr+Ile)        | <i>TS1/TD1</i>                                             | 0.0632         | 0.8624        |
| <b>Free Lys/(Met+Thr+Ile)</b> | <b>TS1/THAs</b>                                            | <b>0.4411</b>  | <b>0.2020</b> |
| <b>Free Lys/Asp</b>           | <i>(AK-HSDHs+CGS1)/SAMSs</i>                               | <b>0.5986</b>  | <b>0.0675</b> |
| <b>Free Lys/Asp</b>           | <i>(AK-HSDHs+TS1)/(THAs+TD1)</i>                           | <b>0.4067</b>  | <b>0.2435</b> |
| <b>Free Lys/Asp</b>           | <i>(AK-HSDHs+TS1+TD1)/BCAT1</i>                            | <b>0.4628</b>  | <b>0.1780</b> |
| Free Lys/Asp                  | <i>(AKs+AK-HSDHs)/AK-HSDHs</i>                             | -0.0682        | 0.8516        |
| Free Lys/Asp                  | <i>(AKs+AK-HSDHs+CGS1)/SAMSs</i>                           | 0.2047         | 0.5704        |
| <b>Free Lys/Asp</b>           | <b><i>(AKs+AK-HSDHs+DHDPSs)/LKR-SDHI</i></b>               | <b>0.4479</b>  | <b>0.1942</b> |
| <b>Free Lys/Asp</b>           | <b><i>(AKs+AK-HSDHs+TS1)/(THAs+TD1)</i></b>                | <b>0.4200</b>  | <b>0.2269</b> |
| <b>Free Lys/Asp</b>           | <b><i>(AKs+AK-HSDHs+TS1+TD1)/BCAT1</i></b>                 | <b>0.4575</b>  | <b>0.1837</b> |
| <b>Free Lys/Asp</b>           | <b><i>(AKs+DHDPSs)/LKR-SDHI</i></b>                        | <b>0.4635</b>  | <b>0.1773</b> |
| <b>Free Lys/Asp</b>           | <b>AK activity with four effectors</b>                     | <b>0.6771</b>  | <b>0.0315</b> |
| <b>Free Lys/Asp</b>           | <b>AK activity without effectors</b>                       | <b>0.7785</b>  | <b>0.0080</b> |
| Free Lys/Asp                  | AK activity/HSDH activity with four effectors              | 0.1690         | 0.6408        |
| Free Lys/Asp                  | AK activity/HSDH activity without effectors                | 0.0229         | 0.9499        |
| Free Lys/Asp                  | <i>AK1</i>                                                 | -0.2283        | 0.5258        |
| Free Lys/Asp                  | <i>AK1+AK2</i>                                             | 0.2848         | 0.4252        |

|                     |                              |                |               |
|---------------------|------------------------------|----------------|---------------|
| <b>Free Lys/Asp</b> | <b>AK1+AK3</b>               | <b>-0.5783</b> | <b>0.0799</b> |
| Free Lys/Asp        | AK2                          | 0.3219         | 0.3644        |
| Free Lys/Asp        | AK2+AK3                      | 0.2310         | 0.5208        |
| <b>Free Lys/Asp</b> | <b>AK3</b>                   | <b>-0.4697</b> | <b>0.1708</b> |
| Free Lys/Asp        | AK-HSDH1                     | 0.3972         | 0.2557        |
| Free Lys/Asp        | AK-HSDH2                     | -0.0551        | 0.8798        |
| Free Lys/Asp        | AK-HSDHs                     | 0.1920         | 0.5951        |
| Free Lys/Asp        | AK-HSDHs+CGS1                | 0.3809         | 0.2775        |
| Free Lys/Asp        | AK-HSDHs+TS1                 | 0.3116         | 0.3809        |
| Free Lys/Asp        | AK-HSDHs+TS1+TD1             | 0.2701         | 0.4504        |
| Free Lys/Asp        | AK-HSDHs+TS1+THAs            | 0.3223         | 0.3638        |
| Free Lys/Asp        | AKs                          | 0.1938         | 0.5917        |
| Free Lys/Asp        | AKs/AK-HSDHs                 | -0.0682        | 0.8516        |
| Free Lys/Asp        | AKs+AK-HSDHs                 | 0.2515         | 0.4834        |
| Free Lys/Asp        | AKs+AK-HSDHs+CGS1            | 0.3547         | 0.3146        |
| Free Lys/Asp        | AKs+AK-HSDHs+DHDPSs          | 0.2432         | 0.4983        |
| Free Lys/Asp        | AKs+AK-HSDHs+TS1             | 0.3505         | 0.3208        |
| Free Lys/Asp        | AKs+AK-HSDHs+TS1+TD1         | 0.3265         | 0.3572        |
| Free Lys/Asp        | AKs+AK-HSDHs+TS1+THAs        | 0.3556         | 0.3132        |
| Free Lys/Asp        | AKs+DHDPSs                   | 0.1875         | 0.6040        |
| Free Lys/Asp        | BCAT1                        | 0.3207         | 0.3662        |
| Free Lys/Asp        | Biosynthetic genes analyzed  | 0.3990         | 0.2534        |
| Free Lys/Asp        | Catabolic genes analyzed     | -0.0235        | 0.9486        |
| <b>Free Lys/Asp</b> | <b>CGS1</b>                  | <b>0.5067</b>  | <b>0.1350</b> |
| Free Lys/Asp        | CGS1/SAMSs                   | 0.3432         | 0.3316        |
| Free Lys/Asp        | CGS1/TS1                     | -0.0009        | 0.9981        |
| Free Lys/Asp        | DHDPS1                       | -0.1830        | 0.6128        |
| Free Lys/Asp        | DHDPS2                       | -0.0228        | 0.9502        |
| Free Lys/Asp        | DHDPSs                       | -0.1528        | 0.6734        |
| Free Lys/Asp        | DHDPSs/AK-HSDHs              | -0.2894        | 0.4174        |
| Free Lys/Asp        | DHDPSs/LKR-SDH1              | 0.1763         | 0.6261        |
| Free Lys/Asp        | Free (Lys+Met+Thr+Ile)/Asp   | 0.3484         | 0.3238        |
| Free Lys/Asp        | Free Ala                     | -0.3188        | 0.3693        |
| Free Lys/Asp        | Free Arg                     | 0.1715         | 0.6356        |
| Free Lys/Asp        | Free Asn                     | -0.2854        | 0.4241        |
| <b>Free Lys/Asp</b> | <b>Free Asn+Asp</b>          | <b>-0.6059</b> | <b>0.0634</b> |
| Free Lys/Asp        | Free Asn+Asp+Lys+Met+Thr+Ile | -0.1555        | 0.6680        |
| Free Lys/Asp        | Free Asn+Asp+Lys+Thr+Ile     | -0.1557        | 0.6676        |
| <b>Free Lys/Asp</b> | <b>Free Asp</b>              | <b>-0.6471</b> | <b>0.0431</b> |
| Free Lys/Asp        | Free Asp+Lys+Met+Thr+Ile     | -0.1397        | 0.7002        |
| Free Lys/Asp        | Free Cys                     | -0.0090        | 0.9803        |
| Free Lys/Asp        | Free Gln                     | -0.3537        | 0.3160        |
| <b>Free Lys/Asp</b> | <b>Free Glu</b>              | <b>-0.5972</b> | <b>0.0683</b> |
| <b>Free Lys/Asp</b> | <b>Free Gly</b>              | <b>-0.5475</b> | <b>0.1014</b> |
| <b>Free Lys/Asp</b> | <b>Free Gly/Thr</b>          | <b>-0.5494</b> | <b>0.0999</b> |
| <b>Free Lys/Asp</b> | <b>Free Gly+Ile</b>          | <b>-0.5168</b> | <b>0.1261</b> |
| Free Lys/Asp        | Free His                     | -0.0273        | 0.9403        |
| Free Lys/Asp        | Free Ile                     | 0.3955         | 0.2579        |
| Free Lys/Asp        | Free Ile/Thr                 | -0.2611        | 0.4663        |
| Free Lys/Asp        | Free Leu                     | 0.0030         | 0.9935        |
| Free Lys/Asp        | Free Lys                     | 0.0600         | 0.8693        |
| Free Lys/Asp        | Free Lys/(Met+Thr+Ile)       | -0.2834        | 0.4275        |
| Free Lys/Asp        | Free Lys/Thr                 | -0.3083        | 0.3862        |
| Free Lys/Asp        | Free Lys+Met+Thr+Ile         | 0.1284         | 0.7237        |
| Free Lys/Asp        | Free Met                     | -0.2017        | 0.5762        |
| <b>Free Lys/Asp</b> | <b>Free Met/Thr</b>          | <b>-0.4222</b> | <b>0.2242</b> |
| Free Lys/Asp        | Free Met+Thr+Ile             | 0.1260         | 0.7286        |

|                     |                                                      |                |               |
|---------------------|------------------------------------------------------|----------------|---------------|
| Free Lys/Asp        | Free Phe                                             | -0.0104        | 0.9774        |
| <b>Free Lys/Asp</b> | <b>Free Pro</b>                                      | <b>-0.4467</b> | <b>0.1956</b> |
| <b>Free Lys/Asp</b> | <b>Free Ser</b>                                      | <b>-0.5291</b> | <b>0.1158</b> |
| Free Lys/Asp        | Free Thr                                             | 0.1218         | 0.7375        |
| Free Lys/Asp        | Free Trp                                             | 0.0126         | 0.9725        |
| Free Lys/Asp        | Free Tyr                                             | 0.2878         | 0.4200        |
| Free Lys/Asp        | Free Val                                             | -0.0137        | 0.9701        |
| <b>Free Lys/Asp</b> | <b>HSDH activity with four effectors</b>             | <b>0.5846</b>  | <b>0.0759</b> |
| <b>Free Lys/Asp</b> | <b>HSDH activity without effectors</b>               | <b>0.6788</b>  | <b>0.0309</b> |
| Free Lys/Asp        | <i>LKR-SDHI</i>                                      | -0.2853        | 0.4243        |
| <b>Free Lys/Asp</b> | <b>Lys-sensitive AK activity</b>                     | <b>0.6398</b>  | <b>0.0463</b> |
| Free Lys/Asp        | Lys-sensitive AK activity/Thr-sensitive AK activity  | 0.2947         | 0.4085        |
| <b>Free Lys/Asp</b> | <b>SAMS1</b>                                         | <b>-0.4717</b> | <b>0.1687</b> |
| Free Lys/Asp        | <i>SAMS2</i>                                         | -0.1679        | 0.6430        |
| Free Lys/Asp        | <i>SAMS3</i>                                         | 0.1980         | 0.5835        |
| Free Lys/Asp        | <i>SAMS4</i>                                         | 0.0085         | 0.9815        |
| Free Lys/Asp        | <i>SAMSs</i>                                         | -0.0248        | 0.9457        |
| Free Lys/Asp        | <i>TD1</i>                                           | -0.2068        | 0.5664        |
| <b>Free Lys/Asp</b> | <b>TD1/BCAT1</b>                                     | <b>0.4180</b>  | <b>0.2293</b> |
| Free Lys/Asp        | <i>THA1</i>                                          | -0.2390        | 0.5061        |
| <b>Free Lys/Asp</b> | <b>THA2</b>                                          | <b>0.6100</b>  | <b>0.0611</b> |
| <b>Free Lys/Asp</b> | <b>THAs</b>                                          | <b>0.5259</b>  | <b>0.1184</b> |
| Free Lys/Asp        | <i>THAs+TD1</i>                                      | -0.0866        | 0.8120        |
| Free Lys/Asp        | Thr-sensitive AK activity                            | -0.0875        | 0.8101        |
| <b>Free Lys/Asp</b> | <b>Total free AAs</b>                                | <b>-0.4743</b> | <b>0.1660</b> |
| Free Lys/Asp        | <i>TS1</i>                                           | 0.3245         | 0.3604        |
| <b>Free Lys/Asp</b> | <b>TS1/(THAs+TD1)</b>                                | <b>0.4155</b>  | <b>0.2324</b> |
| Free Lys/Asp        | <i>TS1/TD1</i>                                       | 0.3705         | 0.2920        |
| Free Lys/Asp        | <i>TS1/THAs</i>                                      | -0.2584        | 0.4711        |
| Free Lys/Thr        | <i>(AK-HSDHs+CGS1)/SAMSs</i>                         | -0.0169        | 0.9631        |
| Free Lys/Thr        | <i>(AK-HSDHs+TS1)/(THAs+TD1)</i>                     | 0.1351         | 0.7099        |
| Free Lys/Thr        | <i>(AK-HSDHs+TS1+TD1)/BCAT1</i>                      | 0.1470         | 0.6853        |
| <b>Free Lys/Thr</b> | <b>(AKs+AK-HSDHs)/AK-HSDHs</b>                       | <b>-0.6987</b> | <b>0.0246</b> |
| <b>Free Lys/Thr</b> | <b>(AKs+AK-HSDHs+CGS1)/SAMSs</b>                     | <b>-0.6342</b> | <b>0.0489</b> |
| Free Lys/Thr        | <i>(AKs+AK-HSDHs+DHDPSs)/LKR-SDHI</i>                | -0.0992        | 0.7851        |
| Free Lys/Thr        | <i>(AKs+AK-HSDHs+TS1)/(THAs+TD1)</i>                 | -0.2826        | 0.4289        |
| Free Lys/Thr        | <i>(AKs+AK-HSDHs+TS1+TD1)/BCAT1</i>                  | 0.1201         | 0.7411        |
| Free Lys/Thr        | <i>(AKs+DHDPSs)/LKR-SDHI</i>                         | -0.2733        | 0.4449        |
| <b>Free Lys/Thr</b> | <b>AK activity with four effectors</b>               | <b>-0.5410</b> | <b>0.1064</b> |
| <b>Free Lys/Thr</b> | <b>AK activity without effectors</b>                 | <b>-0.5838</b> | <b>0.0764</b> |
| <b>Free Lys/Thr</b> | <b>AK activity/HSDH activity with four effectors</b> | <b>-0.7338</b> | <b>0.0157</b> |
| <b>Free Lys/Thr</b> | <b>AK activity/HSDH activity without effectors</b>   | <b>-0.6491</b> | <b>0.0423</b> |
| Free Lys/Thr        | <i>AK1</i>                                           | -0.0324        | 0.9293        |
| <b>Free Lys/Thr</b> | <b>AK1+AK2</b>                                       | <b>-0.7415</b> | <b>0.0141</b> |
| Free Lys/Thr        | <i>AK1+AK3</i>                                       | 0.0353         | 0.9228        |
| <b>Free Lys/Thr</b> | <b>AK2</b>                                           | <b>-0.7082</b> | <b>0.0219</b> |
| <b>Free Lys/Thr</b> | <b>AK2+AK3</b>                                       | <b>-0.6724</b> | <b>0.0331</b> |
| Free Lys/Thr        | <i>AK3</i>                                           | 0.0971         | 0.7896        |
| Free Lys/Thr        | <i>AK-HSDH1</i>                                      | 0.3118         | 0.3805        |
| Free Lys/Thr        | <i>AK-HSDH2</i>                                      | 0.3798         | 0.2791        |
| <b>Free Lys/Thr</b> | <b>AK-HSDHs</b>                                      | <b>0.4231</b>  | <b>0.2231</b> |
| Free Lys/Thr        | <i>AK-HSDHs+CGS1</i>                                 | 0.3288         | 0.3537        |
| Free Lys/Thr        | <i>AK-HSDHs+TS1</i>                                  | 0.2363         | 0.5110        |
| Free Lys/Thr        | <i>AK-HSDHs+TS1+TD1</i>                              | 0.2366         | 0.5104        |
| Free Lys/Thr        | <i>AK-HSDHs+TS1+THAs</i>                             | 0.2254         | 0.5313        |
| <b>Free Lys/Thr</b> | <b>AKs</b>                                           | <b>-0.7117</b> | <b>0.0210</b> |
| <b>Free Lys/Thr</b> | <b>AKs/AK-HSDHs</b>                                  | <b>-0.6987</b> | <b>0.0246</b> |
| <b>Free Lys/Thr</b> | <b>AKs+AK-HSDHs</b>                                  | <b>-0.6284</b> | <b>0.0517</b> |

|                     |                                                            |                |                  |
|---------------------|------------------------------------------------------------|----------------|------------------|
| <b>Free Lys/Thr</b> | <i>AKs+AK-HSDHs+CGSI</i>                                   | <b>-0.5565</b> | <b>0.0948</b>    |
| <b>Free Lys/Thr</b> | <i>AKs+AK-HSDHs+DHDPSs</i>                                 | <b>-0.6162</b> | <b>0.0578</b>    |
| <b>Free Lys/Thr</b> | <i>AKs+AK-HSDHs+TSI</i>                                    | <b>-0.4343</b> | <b>0.2098</b>    |
| <b>Free Lys/Thr</b> | <i>AKs+AK-HSDHs+TSI+TDI</i>                                | <b>-0.4101</b> | <b>0.2391</b>    |
| <b>Free Lys/Thr</b> | <i>AKs+AK-HSDHs+TSI+THAs</i>                               | <b>-0.4407</b> | <b>0.2023</b>    |
| <b>Free Lys/Thr</b> | <i>AKs+DHDPSs</i>                                          | <b>-0.7020</b> | <b>0.0236</b>    |
| Free Lys/Thr        | <i>BCATI</i>                                               | -0.1855        | 0.6080           |
| Free Lys/Thr        | Biosynthetic genes analyzed                                | -0.3594        | 0.3077           |
| Free Lys/Thr        | Catabolic genes analyzed                                   | 0.2742         | 0.4433           |
| Free Lys/Thr        | <i>CGSI</i>                                                | 0.1603         | 0.6582           |
| Free Lys/Thr        | <i>CGSI/SAMSs</i>                                          | -0.2329        | 0.5172           |
| Free Lys/Thr        | <i>CGSI/TSI</i>                                            | -0.0941        | 0.7960           |
| Free Lys/Thr        | <i>DHDPS1</i>                                              | -0.0804        | 0.8253           |
| Free Lys/Thr        | <i>DHDPS2</i>                                              | 0.3228         | 0.3629           |
| Free Lys/Thr        | <i>DHDPSs</i>                                              | 0.1627         | 0.6534           |
| Free Lys/Thr        | <i>DHDPSs/AK-HSDHs</i>                                     | -0.3929        | 0.2614           |
| <b>Free Lys/Thr</b> | <i>DHDPSs/LKR-SDHI</i>                                     | <b>0.4133</b>  | <b>0.2352</b>    |
| <b>Free Lys/Thr</b> | <b>Free (Lys+Met+Thr+Ile)/Asp</b>                          | <b>-0.8557</b> | <b>0.0016</b>    |
| <b>Free Lys/Thr</b> | <b>Free Ala</b>                                            | <b>0.4222</b>  | <b>0.2242</b>    |
| Free Lys/Thr        | Free Arg                                                   | 0.1694         | 0.6398           |
| Free Lys/Thr        | Free Asn                                                   | 0.1850         | 0.6089           |
| Free Lys/Thr        | Free Asn+Asp                                               | 0.3173         | 0.3716           |
| <b>Free Lys/Thr</b> | <b>Free Asn+Asp+Lys+Met+Thr+Ile</b>                        | <b>-0.6050</b> | <b>0.0639</b>    |
| <b>Free Lys/Thr</b> | <b>Free Asn+Asp+Lys+Thr+Ile</b>                            | <b>-0.6087</b> | <b>0.0618</b>    |
| Free Lys/Thr        | Free Asp                                                   | 0.3263         | 0.3575           |
| <b>Free Lys/Thr</b> | <b>Free Asp+Lys+Met+Thr+Ile</b>                            | <b>-0.6352</b> | <b>0.0485</b>    |
| <b>Free Lys/Thr</b> | <b>Free Cys</b>                                            | <b>-0.7078</b> | <b>0.0220</b>    |
| Free Lys/Thr        | Free Gln                                                   | 0.2003         | 0.5790           |
| Free Lys/Thr        | Free Glu                                                   | -0.0036        | 0.9920           |
| Free Lys/Thr        | Free Gly                                                   | 0.2628         | 0.4633           |
| Free Lys/Thr        | Free Gly+Ile                                               | 0.2459         | 0.4934           |
| Free Lys/Thr        | Free His                                                   | 0.1632         | 0.6524           |
| Free Lys/Thr        | Free Ile                                                   | -0.2232        | 0.5353           |
| Free Lys/Thr        | Free Leu                                                   | 0.3496         | 0.3221           |
| Free Lys/Thr        | Free Lys                                                   | 0.1900         | 0.5991           |
| <b>Free Lys/Thr</b> | <b>Free Lys/(Met+Thr+Ile)</b>                              | <b>0.9938</b>  | <b>&lt;.0001</b> |
| <b>Free Lys/Thr</b> | <b>Free Lys+Met+Thr+Ile</b>                                | <b>-0.8138</b> | <b>0.0042</b>    |
| Free Lys/Thr        | Free Met                                                   | 0.3186         | 0.3696           |
| <b>Free Lys/Thr</b> | <b>Free Met+Thr+Ile</b>                                    | <b>-0.8196</b> | <b>0.0037</b>    |
| <b>Free Lys/Thr</b> | <b>Free Phe</b>                                            | <b>0.4558</b>  | <b>0.1855</b>    |
| Free Lys/Thr        | Free Pro                                                   | 0.2179         | 0.5453           |
| <b>Free Lys/Thr</b> | <b>Free Ser</b>                                            | <b>0.5723</b>  | <b>0.0839</b>    |
| <b>Free Lys/Thr</b> | <b>Free Thr</b>                                            | <b>-0.8219</b> | <b>0.0035</b>    |
| <b>Free Lys/Thr</b> | <b>Free Trp</b>                                            | <b>0.4890</b>  | <b>0.1515</b>    |
| Free Lys/Thr        | Free Tyr                                                   | 0.3731         | 0.2883           |
| <b>Free Lys/Thr</b> | <b>Free Val</b>                                            | <b>0.4599</b>  | <b>0.1811</b>    |
| Free Lys/Thr        | HSDH activity with four effectors                          | 0.2880         | 0.4197           |
| Free Lys/Thr        | HSDH activity without effectors                            | 0.2167         | 0.5476           |
| Free Lys/Thr        | <i>LKR-SDHI</i>                                            | -0.3088        | 0.3853           |
| <b>Free Lys/Thr</b> | <b>Lys-sensitive AK activity</b>                           | <b>-0.7222</b> | <b>0.0183</b>    |
| <b>Free Lys/Thr</b> | <b>Lys-sensitive AK activity/Thr-sensitive AK activity</b> | <b>-0.6639</b> | <b>0.0363</b>    |
| <b>Free Lys/Thr</b> | <i>SAMS1</i>                                               | <b>0.4155</b>  | <b>0.2324</b>    |
| Free Lys/Thr        | <i>SAMS2</i>                                               | 0.0179         | 0.9608           |
| Free Lys/Thr        | <i>SAMS3</i>                                               | 0.1011         | 0.7810           |
| Free Lys/Thr        | <i>SAMS4</i>                                               | 0.3218         | 0.3646           |
| Free Lys/Thr        | <i>SAMSs</i>                                               | 0.2769         | 0.4386           |
| Free Lys/Thr        | <i>TDI</i>                                                 | 0.1959         | 0.5875           |
| Free Lys/Thr        | <i>TDI/BCATI</i>                                           | 0.1633         | 0.6521           |

|                             |                                                      |                |               |
|-----------------------------|------------------------------------------------------|----------------|---------------|
| Free Lys/Thr                | <i>THA1</i>                                          | 0.1141         | 0.7537        |
| <b>Free Lys/Thr</b>         | <b><i>THA2</i></b>                                   | <b>-0.5493</b> | <b>0.1000</b> |
| <b>Free Lys/Thr</b>         | <b><i>THAs</i></b>                                   | <b>-0.5817</b> | <b>0.0777</b> |
| Free Lys/Thr                | <i>THAs+TD1</i>                                      | 0.0808         | 0.8243        |
| <b>Free Lys/Thr</b>         | <b>Thr-sensitive AK activity</b>                     | <b>0.6860</b>  | <b>0.0285</b> |
| Free Lys/Thr                | Total free AAs                                       | 0.0285         | 0.9376        |
| Free Lys/Thr                | <i>TS1</i>                                           | 0.1236         | 0.7337        |
| Free Lys/Thr                | <i>TS1/(THAs+TD1)</i>                                | 0.0962         | 0.7916        |
| Free Lys/Thr                | <i>TS1/TD1</i>                                       | 0.0363         | 0.9207        |
| <b>Free Lys/Thr</b>         | <b><i>TS1/THAs</i></b>                               | <b>0.4134</b>  | <b>0.2350</b> |
| Free Lys+Met+Thr+Ile        | <i>(AK-HSDHs+CGS1)/SAMSs</i>                         | -0.1160        | 0.7497        |
| Free Lys+Met+Thr+Ile        | <i>(AK-HSDHs+TS1)/(THAs+TD1)</i>                     | -0.2833        | 0.4277        |
| Free Lys+Met+Thr+Ile        | <i>(AK-HSDHs+TS1+TD1)/BCAT1</i>                      | -0.0957        | 0.7925        |
| <b>Free Lys+Met+Thr+Ile</b> | <b><i>(AKs+AK-HSDHs)/AK-HSDHs</i></b>                | <b>0.6401</b>  | <b>0.0462</b> |
| <b>Free Lys+Met+Thr+Ile</b> | <b><i>(AKs+AK-HSDHs+CGS1)/SAMSs</i></b>              | <b>0.5659</b>  | <b>0.0882</b> |
| Free Lys+Met+Thr+Ile        | <i>(AKs+AK-HSDHs+DHDPSs)/LKR-SDHI</i>                | -0.2172        | 0.5466        |
| Free Lys+Met+Thr+Ile        | <i>(AKs+AK-HSDHs+TS1)/(THAs+TD1)</i>                 | 0.0113         | 0.9753        |
| Free Lys+Met+Thr+Ile        | <i>(AKs+AK-HSDHs+TS1+TD1)/BCAT1</i>                  | -0.0754        | 0.8361        |
| Free Lys+Met+Thr+Ile        | <i>(AKs+DHDPSs)/LKR-SDHI</i>                         | -0.0752        | 0.8363        |
| Free Lys+Met+Thr+Ile        | AK activity with four effectors                      | 0.2436         | 0.4976        |
| Free Lys+Met+Thr+Ile        | AK activity without effectors                        | 0.3545         | 0.3149        |
| <b>Free Lys+Met+Thr+Ile</b> | <b>AK activity/HSDH activity with four effectors</b> | <b>0.4498</b>  | <b>0.1921</b> |
| Free Lys+Met+Thr+Ile        | AK activity/HSDH activity without effectors          | 0.3784         | 0.2809        |
| Free Lys+Met+Thr+Ile        | <i>AK1</i>                                           | 0.0464         | 0.8988        |
| <b>Free Lys+Met+Thr+Ile</b> | <b><i>AK1+AK2</i></b>                                | <b>0.6238</b>  | <b>0.0539</b> |
| Free Lys+Met+Thr+Ile        | <i>AK1+AK3</i>                                       | 0.0569         | 0.8760        |
| <b>Free Lys+Met+Thr+Ile</b> | <b><i>AK2</i></b>                                    | <b>0.5909</b>  | <b>0.0720</b> |
| <b>Free Lys+Met+Thr+Ile</b> | <b><i>AK2+AK3</i></b>                                | <b>0.5762</b>  | <b>0.0813</b> |
| Free Lys+Met+Thr+Ile        | <i>AK3</i>                                           | 0.0034         | 0.9925        |
| Free Lys+Met+Thr+Ile        | <i>AK-HSDH1</i>                                      | -0.2784        | 0.4360        |
| <b>Free Lys+Met+Thr+Ile</b> | <b><i>AK-HSDH2</i></b>                               | <b>-0.4419</b> | <b>0.2010</b> |
| <b>Free Lys+Met+Thr+Ile</b> | <b><i>AK-HSDHs</i></b>                               | <b>-0.4443</b> | <b>0.1982</b> |
| <b>Free Lys+Met+Thr+Ile</b> | <b><i>AK-HSDHs+CGS1</i></b>                          | <b>-0.4024</b> | <b>0.2489</b> |
| Free Lys+Met+Thr+Ile        | <i>AK-HSDHs+TS1</i>                                  | -0.0042        | 0.9908        |
| Free Lys+Met+Thr+Ile        | <i>AK-HSDHs+TS1+TD1</i>                              | 0.0063         | 0.9862        |
| Free Lys+Met+Thr+Ile        | <i>AK-HSDHs+TS1+THAs</i>                             | 0.0081         | 0.9822        |
| <b>Free Lys+Met+Thr+Ile</b> | <b><i>AKs</i></b>                                    | <b>0.6144</b>  | <b>0.0588</b> |
| <b>Free Lys+Met+Thr+Ile</b> | <b><i>AKs/AK-HSDHs</i></b>                           | <b>0.6401</b>  | <b>0.0462</b> |
| <b>Free Lys+Met+Thr+Ile</b> | <b><i>AKs+AK-HSDHs</i></b>                           | <b>0.5213</b>  | <b>0.1223</b> |
| <b>Free Lys+Met+Thr+Ile</b> | <b><i>AKs+AK-HSDHs+CGS1</i></b>                      | <b>0.4298</b>  | <b>0.2151</b> |
| <b>Free Lys+Met+Thr+Ile</b> | <b><i>AKs+AK-HSDHs+DHDPSs</i></b>                    | <b>0.5236</b>  | <b>0.1204</b> |
| <b>Free Lys+Met+Thr+Ile</b> | <b><i>AKs+AK-HSDHs+TS1</i></b>                       | <b>0.4987</b>  | <b>0.1423</b> |
| <b>Free Lys+Met+Thr+Ile</b> | <b><i>AKs+AK-HSDHs+TS1+TD1</i></b>                   | <b>0.4892</b>  | <b>0.1513</b> |
| <b>Free Lys+Met+Thr+Ile</b> | <b><i>AKs+AK-HSDHs+TS1+THAs</i></b>                  | <b>0.5041</b>  | <b>0.1374</b> |
| <b>Free Lys+Met+Thr+Ile</b> | <b><i>AKs+DHDPSs</i></b>                             | <b>0.6185</b>  | <b>0.0566</b> |
| Free Lys+Met+Thr+Ile        | <i>BCAT1</i>                                         | -0.0195        | 0.9573        |
| <b>Free Lys+Met+Thr+Ile</b> | <b>Biosynthetic genes analyzed</b>                   | <b>0.4080</b>  | <b>0.2418</b> |
| Free Lys+Met+Thr+Ile        | Catabolic genes analyzed                             | -0.2980        | 0.4030        |
| Free Lys+Met+Thr+Ile        | <i>CGS1</i>                                          | -0.2750        | 0.4419        |
| Free Lys+Met+Thr+Ile        | <i>CGS1/SAMSs</i>                                    | 0.1609         | 0.6570        |
| <b>Free Lys+Met+Thr+Ile</b> | <b><i>CGS1/TS1</i></b>                               | <b>-0.4086</b> | <b>0.2411</b> |
| <b>Free Lys+Met+Thr+Ile</b> | <b><i>DHDPS1</i></b>                                 | <b>0.5642</b>  | <b>0.0893</b> |
| Free Lys+Met+Thr+Ile        | <i>DHDPS2</i>                                        | -0.2296        | 0.5234        |
| Free Lys+Met+Thr+Ile        | <i>DHDPSs</i>                                        | 0.1900         | 0.5990        |
| <b>Free Lys+Met+Thr+Ile</b> | <b><i>DHDPSs/AK-HSDHs</i></b>                        | <b>0.5585</b>  | <b>0.0933</b> |
| <b>Free Lys+Met+Thr+Ile</b> | <b><i>DHDPSs/LKR-SDHI</i></b>                        | <b>-0.4779</b> | <b>0.1624</b> |
| Free Lys+Met+Thr+Ile        | Free Ala                                             | -0.1596        | 0.6596        |



|                             |                                                            |                |                  |
|-----------------------------|------------------------------------------------------------|----------------|------------------|
| Free Lys+Met+Thr+Ile        | Free Arg                                                   | -0.0420        | 0.9083           |
| Free Lys+Met+Thr+Ile        | Free Asn                                                   | 0.0370         | 0.9191           |
| Free Lys+Met+Thr+Ile        | Free Asp                                                   | -0.0763        | 0.8341           |
| <b>Free Lys+Met+Thr+Ile</b> | <b>Free Cys</b>                                            | <b>0.8638</b>  | <b>0.0013</b>    |
| Free Lys+Met+Thr+Ile        | Free Gln                                                   | -0.0450        | 0.9017           |
| Free Lys+Met+Thr+Ile        | Free Glu                                                   | 0.2166         | 0.5478           |
| Free Lys+Met+Thr+Ile        | Free Gly                                                   | -0.0942        | 0.7959           |
| Free Lys+Met+Thr+Ile        | Free His                                                   | -0.0100        | 0.9781           |
| <b>Free Lys+Met+Thr+Ile</b> | <b>Free Ile</b>                                            | <b>0.4994</b>  | <b>0.1416</b>    |
| Free Lys+Met+Thr+Ile        | Free Leu                                                   | -0.1168        | 0.7480           |
| Free Lys+Met+Thr+Ile        | Free Lys                                                   | -0.0194        | 0.9576           |
| Free Lys+Met+Thr+Ile        | Free Met                                                   | -0.1209        | 0.7394           |
| Free Lys+Met+Thr+Ile        | Free Phe                                                   | -0.2566        | 0.4742           |
| Free Lys+Met+Thr+Ile        | Free Pro                                                   | -0.1030        | 0.7771           |
| <b>Free Lys+Met+Thr+Ile</b> | <b>Free Ser</b>                                            | <b>-0.4742</b> | <b>0.1662</b>    |
| <b>Free Lys+Met+Thr+Ile</b> | <b>Free Thr</b>                                            | <b>0.9984</b>  | <b>&lt;.0001</b> |
| Free Lys+Met+Thr+Ile        | Free Trp                                                   | -0.3425        | 0.3327           |
| Free Lys+Met+Thr+Ile        | Free Tyr                                                   | -0.2783        | 0.4363           |
| Free Lys+Met+Thr+Ile        | Free Val                                                   | -0.2296        | 0.5235           |
| Free Lys+Met+Thr+Ile        | HSDH activity with four effectors                          | -0.3018        | 0.3968           |
| Free Lys+Met+Thr+Ile        | HSDH activity without effectors                            | -0.1717        | 0.6353           |
| <b>Free Lys+Met+Thr+Ile</b> | <b>LKR-SDHI</b>                                            | <b>0.6404</b>  | <b>0.0461</b>    |
| <b>Free Lys+Met+Thr+Ile</b> | <b>Lys-sensitive AK activity</b>                           | <b>0.5107</b>  | <b>0.1314</b>    |
| <b>Free Lys+Met+Thr+Ile</b> | <b>Lys-sensitive AK activity/Thr-sensitive AK activity</b> | <b>0.6061</b>  | <b>0.0632</b>    |
| Free Lys+Met+Thr+Ile        | <i>SAMS1</i>                                               | -0.2122        | 0.5561           |
| <b>Free Lys+Met+Thr+Ile</b> | <b><i>SAMS2</i></b>                                        | <b>0.4127</b>  | <b>0.2359</b>    |
| Free Lys+Met+Thr+Ile        | <i>SAMS3</i>                                               | -0.2609        | 0.4666           |
| Free Lys+Met+Thr+Ile        | <i>SAMS4</i>                                               | -0.2833        | 0.4277           |
| Free Lys+Met+Thr+Ile        | <i>SAMSs</i>                                               | -0.3031        | 0.3947           |
| Free Lys+Met+Thr+Ile        | <i>TD1</i>                                                 | 0.0676         | 0.8527           |
| Free Lys+Met+Thr+Ile        | <i>TD1/BCAT1</i>                                           | -0.1034        | 0.7763           |
| Free Lys+Met+Thr+Ile        | <i>THA1</i>                                                | 0.1613         | 0.6563           |
| <b>Free Lys+Met+Thr+Ile</b> | <b><i>THA2</i></b>                                         | <b>0.5344</b>  | <b>0.1116</b>    |
| <b>Free Lys+Met+Thr+Ile</b> | <b><i>THAs</i></b>                                         | <b>0.6157</b>  | <b>0.0581</b>    |
| Free Lys+Met+Thr+Ile        | <i>THAs+TD1</i>                                            | 0.1853         | 0.6083           |
| <b>Free Lys+Met+Thr+Ile</b> | <b>Thr-sensitive AK activity</b>                           | <b>-0.5507</b> | <b>0.0990</b>    |
| Free Lys+Met+Thr+Ile        | Total free AAs                                             | 0.2192         | 0.5430           |
| Free Lys+Met+Thr+Ile        | <i>TS1</i>                                                 | 0.1912         | 0.5966           |
| Free Lys+Met+Thr+Ile        | <i>TS1/(THAs+TD1)</i>                                      | -0.1857        | 0.6076           |
| Free Lys+Met+Thr+Ile        | <i>TS1/TD1</i>                                             | -0.2522        | 0.4820           |
| Free Lys+Met+Thr+Ile        | <i>TS1/THAs</i>                                            | -0.2301        | 0.5225           |
| Free Met                    | <i>(AK-HSDHs+CGS1)/SAMSs</i>                               | -0.1201        | 0.7410           |
| <b>Free Met</b>             | <b><i>(AK-HSDHs+TS1)/(THAs+TD1)</i></b>                    | <b>-0.6690</b> | <b>0.0344</b>    |
| <b>Free Met</b>             | <b><i>(AK-HSDHs+TS1+TD1)/BCAT1</i></b>                     | <b>0.6313</b>  | <b>0.0503</b>    |
| Free Met                    | <i>(AKs+AK-HSDHs)/AK-HSDHs</i>                             | -0.0635        | 0.8617           |
| Free Met                    | <i>(AKs+AK-HSDHs+CGS1)/SAMSs</i>                           | -0.1891        | 0.6009           |
| Free Met                    | <i>(AKs+AK-HSDHs+DHDPSs)/LKR-SDHI</i>                      | -0.3122        | 0.3798           |
| <b>Free Met</b>             | <b><i>(AKs+AK-HSDHs+TS1)/(THAs+TD1)</i></b>                | <b>-0.7439</b> | <b>0.0136</b>    |
| <b>Free Met</b>             | <b><i>(AKs+AK-HSDHs+TS1+TD1)/BCAT1</i></b>                 | <b>0.6323</b>  | <b>0.0498</b>    |
| Free Met                    | <i>(AKs+DHDPSs)/LKR-SDHI</i>                               | -0.3094        | 0.3844           |
| Free Met                    | AK activity with four effectors                            | -0.2973        | 0.4041           |
| <b>Free Met</b>             | <b>AK activity without effectors</b>                       | <b>-0.4467</b> | <b>0.1956</b>    |
| Free Met                    | AK activity/HSDH activity with four effectors              | -0.2570        | 0.4735           |
| Free Met                    | AK activity/HSDH activity without effectors                | -0.1968        | 0.5858           |
| Free Met                    | <i>AK1</i>                                                 | -0.0205        | 0.9551           |
| Free Met                    | <i>AK1+AK2</i>                                             | -0.0988        | 0.7859           |
| Free Met                    | <i>AK1+AK3</i>                                             | -0.1747        | 0.6292           |

|                 |                                                     |                |               |
|-----------------|-----------------------------------------------------|----------------|---------------|
| Free Met        | AK2                                                 | -0.0904        | 0.8039        |
| Free Met        | AK2+AK3                                             | -0.1227        | 0.7356        |
| Free Met        | AK3                                                 | -0.1888        | 0.6014        |
| Free Met        | AK-HSDH1                                            | -0.3670        | 0.2969        |
| Free Met        | AK-HSDH2                                            | 0.2528         | 0.4810        |
| Free Met        | AK-HSDHs                                            | -0.0383        | 0.9163        |
| Free Met        | AK-HSDHs+CGS1                                       | 0.1683         | 0.6421        |
| Free Met        | AK-HSDHs+TS1                                        | 0.1497         | 0.6797        |
| Free Met        | AK-HSDHs+TS1+TD1                                    | 0.1923         | 0.5946        |
| Free Met        | AK-HSDHs+TS1+THAs                                   | 0.1528         | 0.6734        |
| Free Met        | AKs                                                 | -0.1315        | 0.7173        |
| Free Met        | AKs/AK-HSDHs                                        | -0.0635        | 0.8617        |
| Free Met        | AKs+AK-HSDHs                                        | -0.1465        | 0.6863        |
| Free Met        | AKs+AK-HSDHs+CGS1                                   | -0.0570        | 0.8757        |
| Free Met        | AKs+AK-HSDHs+DHDPSs                                 | -0.1245        | 0.7318        |
| Free Met        | AKs+AK-HSDHs+TS1                                    | -0.0147        | 0.9678        |
| Free Met        | AKs+AK-HSDHs+TS1+TD1                                | 0.0193         | 0.9578        |
| Free Met        | AKs+AK-HSDHs+TS1+THAs                               | -0.0137        | 0.9700        |
| Free Met        | AKs+DHDPSs                                          | -0.1093        | 0.7637        |
| <b>Free Met</b> | <b>BCAT1</b>                                        | <b>-0.7695</b> | <b>0.0093</b> |
| Free Met        | Biosynthetic genes analyzed                         | 0.0632         | 0.8622        |
| Free Met        | Catabolic genes analyzed                            | 0.2045         | 0.5710        |
| Free Met        | CGS1                                                | 0.3576         | 0.3103        |
| Free Met        | CGS1/SAMSs                                          | 0.0348         | 0.9240        |
| Free Met        | CGS1/TS1                                            | 0.0647         | 0.8590        |
| <b>Free Met</b> | <b>DHDPS1</b>                                       | <b>0.4111</b>  | <b>0.2379</b> |
| <b>Free Met</b> | <b>DHDPS2</b>                                       | <b>0.4535</b>  | <b>0.1881</b> |
| <b>Free Met</b> | <b>DHDPSs</b>                                       | <b>0.5503</b>  | <b>0.0993</b> |
| Free Met        | DHDPSs/AK-HSDHs                                     | 0.1699         | 0.6389        |
| Free Met        | DHDPSs/LKR-SDH1                                     | 0.1301         | 0.7202        |
| <b>Free Met</b> | <b>Free Ala</b>                                     | <b>0.5728</b>  | <b>0.0835</b> |
| <b>Free Met</b> | <b>Free Arg</b>                                     | <b>0.5668</b>  | <b>0.0875</b> |
| <b>Free Met</b> | <b>Free Asn</b>                                     | <b>0.6977</b>  | <b>0.0249</b> |
| <b>Free Met</b> | <b>Free Asp</b>                                     | <b>0.7355</b>  | <b>0.0153</b> |
| Free Met        | Free Cys                                            | 0.1562         | 0.6666        |
| <b>Free Met</b> | <b>Free Gln</b>                                     | <b>0.6696</b>  | <b>0.0342</b> |
| <b>Free Met</b> | <b>Free Glu</b>                                     | <b>0.5887</b>  | <b>0.0734</b> |
| <b>Free Met</b> | <b>Free Gly</b>                                     | <b>0.4927</b>  | <b>0.1480</b> |
| <b>Free Met</b> | <b>Free His</b>                                     | <b>0.6711</b>  | <b>0.0336</b> |
| Free Met        | Free Ile                                            | 0.3612         | 0.3052        |
| <b>Free Met</b> | <b>Free Leu</b>                                     | <b>0.7813</b>  | <b>0.0076</b> |
| <b>Free Met</b> | <b>Free Lys</b>                                     | <b>0.8176</b>  | <b>0.0039</b> |
| Free Met        | HSDH activity with four effectors                   | 0.1324         | 0.7154        |
| Free Met        | HSDH activity without effectors                     | -0.0346        | 0.9245        |
| Free Met        | LKR-SDH1                                            | 0.0000         | 1.0000        |
| <b>Free Met</b> | <b>Lys-sensitive AK activity</b>                    | <b>-0.5405</b> | <b>0.1068</b> |
| Free Met        | Lys-sensitive AK activity/Thr-sensitive AK activity | -0.0011        | 0.9976        |
| <b>Free Met</b> | <b>SAMS1</b>                                        | <b>0.6725</b>  | <b>0.0331</b> |
| <b>Free Met</b> | <b>SAMS2</b>                                        | <b>0.4836</b>  | <b>0.1568</b> |
| Free Met        | SAMS3                                               | -0.1098        | 0.7628        |
| Free Met        | SAMS4                                               | 0.2072         | 0.5656        |
| Free Met        | SAMSs                                               | 0.2051         | 0.5698        |
| <b>Free Met</b> | <b>TD1</b>                                          | <b>0.5447</b>  | <b>0.1035</b> |
| <b>Free Met</b> | <b>TD1/BCAT1</b>                                    | <b>0.6618</b>  | <b>0.0371</b> |
| Free Met        | THA1                                                | -0.2182        | 0.5447        |
| Free Met        | THA2                                                | 0.1417         | 0.6961        |
| Free Met        | THAs                                                | 0.1580         | 0.6629        |
| <b>Free Met</b> | <b>THAs+TD1</b>                                     | <b>0.5537</b>  | <b>0.0968</b> |

|                           |                                                      |                |               |
|---------------------------|------------------------------------------------------|----------------|---------------|
| Free Met                  | Thr-sensitive AK activity                            | -0.0880        | 0.8090        |
| Free Met                  | <i>TS1</i>                                           | 0.2136         | 0.5536        |
| <b>Free Met</b>           | <b><i>TS1/(THAs+TD1)</i></b>                         | <b>-0.6323</b> | <b>0.0498</b> |
| <b>Free Met</b>           | <b><i>TS1/TD1</i></b>                                | <b>-0.7269</b> | <b>0.0172</b> |
| Free Met                  | <i>TS1/THAs</i>                                      | 0.1467         | 0.6859        |
| Free Met/(Thr+Ile)        | <i>(AK-HSDHs+CGS1)/SAMs</i>                          | -0.0900        | 0.8046        |
| Free Met/(Thr+Ile)        | <i>(AK-HSDHs+TS1)/(THAs+TD1)</i>                     | 0.0466         | 0.8982        |
| Free Met/(Thr+Ile)        | <i>(AK-HSDHs+TS1+TD1)/BCAT1</i>                      | 0.2218         | 0.5380        |
| <b>Free Met/(Thr+Ile)</b> | <b><i>(AKs+AK-HSDHs)/AK-HSDHs</i></b>                | <b>-0.6869</b> | <b>0.0282</b> |
| <b>Free Met/(Thr+Ile)</b> | <b><i>(AKs+AK-HSDHs+CGS1)/SAMs</i></b>               | <b>-0.6689</b> | <b>0.0344</b> |
| Free Met/(Thr+Ile)        | <i>(AKs+AK-HSDHs+DHDPSs)/LKR-SDHI</i>                | -0.2212        | 0.5391        |
| Free Met/(Thr+Ile)        | <i>(AKs+AK-HSDHs+TS1)/(THAs+TD1)</i>                 | -0.3767        | 0.2833        |
| Free Met/(Thr+Ile)        | <i>(AKs+AK-HSDHs+TS1+TD1)/BCAT1</i>                  | 0.1942         | 0.5909        |
| Free Met/(Thr+Ile)        | <i>(AKs+DHDPSs)/LKR-SDHI</i>                         | -0.3864        | 0.2701        |
| <b>Free Met/(Thr+Ile)</b> | <b>AK activity with four effectors</b>               | <b>-0.6291</b> | <b>0.0513</b> |
| <b>Free Met/(Thr+Ile)</b> | <b>AK activity without effectors</b>                 | <b>-0.6811</b> | <b>0.0301</b> |
| <b>Free Met/(Thr+Ile)</b> | <b>AK activity/HSDH activity with four effectors</b> | <b>-0.7768</b> | <b>0.0082</b> |
| <b>Free Met/(Thr+Ile)</b> | <b>AK activity/HSDH activity without effectors</b>   | <b>-0.7227</b> | <b>0.0182</b> |
| Free Met/(Thr+Ile)        | <i>AK1</i>                                           | 0.0597         | 0.8698        |
| <b>Free Met/(Thr+Ile)</b> | <b><i>AK1+AK2</i></b>                                | <b>-0.7638</b> | <b>0.0101</b> |
| Free Met/(Thr+Ile)        | <i>AK1+AK3</i>                                       | -0.0094        | 0.9795        |
| <b>Free Met/(Thr+Ile)</b> | <b><i>AK2</i></b>                                    | <b>-0.7488</b> | <b>0.0127</b> |
| <b>Free Met/(Thr+Ile)</b> | <b><i>AK2+AK3</i></b>                                | <b>-0.7403</b> | <b>0.0143</b> |
| Free Met/(Thr+Ile)        | <i>AK3</i>                                           | -0.0660        | 0.8562        |
| Free Met/(Thr+Ile)        | <i>AK-HSDH1</i>                                      | 0.2413         | 0.5018        |
| Free Met/(Thr+Ile)        | <i>AK-HSDH2</i>                                      | 0.3025         | 0.3955        |
| Free Met/(Thr+Ile)        | <i>AK-HSDHs</i>                                      | 0.3338         | 0.3458        |
| Free Met/(Thr+Ile)        | <i>AK-HSDHs+CGS1</i>                                 | 0.2426         | 0.4994        |
| Free Met/(Thr+Ile)        | <i>AK-HSDHs+TS1</i>                                  | 0.1373         | 0.7053        |
| Free Met/(Thr+Ile)        | <i>AK-HSDHs+TS1+TD1</i>                              | 0.1422         | 0.6952        |
| Free Met/(Thr+Ile)        | <i>AK-HSDHs+TS1+THAs</i>                             | 0.1261         | 0.7286        |
| <b>Free Met/(Thr+Ile)</b> | <b><i>AKs</i></b>                                    | <b>-0.7632</b> | <b>0.0102</b> |
| <b>Free Met/(Thr+Ile)</b> | <b><i>AKs/AK-HSDHs</i></b>                           | <b>-0.6869</b> | <b>0.0282</b> |
| <b>Free Met/(Thr+Ile)</b> | <b><i>AKs+AK-HSDHs</i></b>                           | <b>-0.7051</b> | <b>0.0227</b> |
| <b>Free Met/(Thr+Ile)</b> | <b><i>AKs+AK-HSDHs+CGS1</i></b>                      | <b>-0.6443</b> | <b>0.0444</b> |
| <b>Free Met/(Thr+Ile)</b> | <b><i>AKs+AK-HSDHs+DHDPSs</i></b>                    | <b>-0.6921</b> | <b>0.0266</b> |
| <b>Free Met/(Thr+Ile)</b> | <b><i>AKs+AK-HSDHs+TS1</i></b>                       | <b>-0.5371</b> | <b>0.1094</b> |
| <b>Free Met/(Thr+Ile)</b> | <b><i>AKs+AK-HSDHs+TS1+TD1</i></b>                   | <b>-0.5115</b> | <b>0.1307</b> |
| <b>Free Met/(Thr+Ile)</b> | <b><i>AKs+AK-HSDHs+TS1+THAs</i></b>                  | <b>-0.5433</b> | <b>0.1046</b> |
| <b>Free Met/(Thr+Ile)</b> | <b><i>AKs+DHDPSs</i></b>                             | <b>-0.7531</b> | <b>0.0119</b> |
| Free Met/(Thr+Ile)        | <i>BCAT1</i>                                         | -0.2303        | 0.5221        |
| <b>Free Met/(Thr+Ile)</b> | <b>Biosynthetic genes analyzed</b>                   | <b>-0.4635</b> | <b>0.1773</b> |
| Free Met/(Thr+Ile)        | Catabolic genes analyzed                             | 0.2501         | 0.4859        |
| Free Met/(Thr+Ile)        | <i>CGS1</i>                                          | 0.0941         | 0.7959        |
| Free Met/(Thr+Ile)        | <i>CGS1/SAMs</i>                                     | -0.2374        | 0.5089        |
| Free Met/(Thr+Ile)        | <i>CGS1/TS1</i>                                      | -0.0599        | 0.8694        |
| Free Met/(Thr+Ile)        | <i>DHDPS1</i>                                        | -0.0168        | 0.9632        |
| Free Met/(Thr+Ile)        | <i>DHDPS2</i>                                        | 0.2746         | 0.4426        |
| Free Met/(Thr+Ile)        | <i>DHDPSs</i>                                        | 0.1691         | 0.6404        |
| Free Met/(Thr+Ile)        | <i>DHDPSs/AK-HSDHs</i>                               | -0.3250        | 0.3596        |
| Free Met/(Thr+Ile)        | <i>DHDPSs/LKR-SDHI</i>                               | 0.3537         | 0.3161        |
| <b>Free Met/(Thr+Ile)</b> | <b>Free (Lys+Met+Thr+Ile)/Asp</b>                    | <b>-0.8270</b> | <b>0.0032</b> |
| <b>Free Met/(Thr+Ile)</b> | <b>Free Ala</b>                                      | <b>0.4005</b>  | <b>0.2514</b> |
| Free Met/(Thr+Ile)        | Free Arg                                             | 0.1452         | 0.6891        |
| Free Met/(Thr+Ile)        | Free Asn                                             | 0.1941         | 0.5910        |
| Free Met/(Thr+Ile)        | Free Asn+Asp                                         | 0.3678         | 0.2958        |
| <b>Free Met/(Thr+Ile)</b> | <b>Free Asn+Asp+Lys+Met+Thr+Ile</b>                  | <b>-0.5604</b> | <b>0.0920</b> |

|                           |                                                            |                |                  |
|---------------------------|------------------------------------------------------------|----------------|------------------|
| <b>Free Met/(Thr+Ile)</b> | <b>Free Asn+Asp+Lys+Thr+Ile</b>                            | <b>-0.5643</b> | <b>0.0893</b>    |
| Free Met/(Thr+Ile)        | Free Asp                                                   | 0.3832         | 0.2744           |
| <b>Free Met/(Thr+Ile)</b> | <b>Free Asp+Lys+Met+Thr+Ile</b>                            | <b>-0.5894</b> | <b>0.0729</b>    |
| <b>Free Met/(Thr+Ile)</b> | <b>Free Cys</b>                                            | <b>-0.6147</b> | <b>0.0586</b>    |
| Free Met/(Thr+Ile)        | Free Gln                                                   | 0.2294         | 0.5237           |
| Free Met/(Thr+Ile)        | Free Glu                                                   | 0.0072         | 0.9843           |
| Free Met/(Thr+Ile)        | Free Gly                                                   | 0.3374         | 0.3403           |
| <b>Free Met/(Thr+Ile)</b> | <b>Free Gly/Thr</b>                                        | <b>0.9375</b>  | <b>&lt;.0001</b> |
| Free Met/(Thr+Ile)        | Free Gly+Ile                                               | 0.3200         | 0.3674           |
| Free Met/(Thr+Ile)        | Free His                                                   | 0.1362         | 0.7075           |
| Free Met/(Thr+Ile)        | Free Ile                                                   | -0.2207        | 0.5401           |
| <b>Free Met/(Thr+Ile)</b> | <b>Free Ile/Thr</b>                                        | <b>0.9430</b>  | <b>&lt;.0001</b> |
| Free Met/(Thr+Ile)        | Free Leu                                                   | 0.3674         | 0.2963           |
| Free Met/(Thr+Ile)        | Free Lys                                                   | 0.2184         | 0.5444           |
| <b>Free Met/(Thr+Ile)</b> | <b>Free Lys/(Met+Thr+Ile)</b>                              | <b>0.9675</b>  | <b>&lt;.0001</b> |
| Free Met/(Thr+Ile)        | Free Lys/Asp                                               | -0.3325        | 0.3478           |
| <b>Free Met/(Thr+Ile)</b> | <b>Free Lys/Thr</b>                                        | <b>0.9743</b>  | <b>&lt;.0001</b> |
| <b>Free Met/(Thr+Ile)</b> | <b>Free Lys+Met+Thr+Ile</b>                                | <b>-0.7893</b> | <b>0.0066</b>    |
| <b>Free Met/(Thr+Ile)</b> | <b>Free Met</b>                                            | <b>0.4111</b>  | <b>0.2379</b>    |
| <b>Free Met/(Thr+Ile)</b> | <b>Free Met/Thr</b>                                        | <b>0.9850</b>  | <b>&lt;.0001</b> |
| <b>Free Met/(Thr+Ile)</b> | <b>Free Met+Thr+Ile</b>                                    | <b>-0.7962</b> | <b>0.0059</b>    |
| <b>Free Met/(Thr+Ile)</b> | <b>Free Phe</b>                                            | <b>0.4309</b>  | <b>0.2138</b>    |
| Free Met/(Thr+Ile)        | Free Pro                                                   | 0.2641         | 0.4609           |
| <b>Free Met/(Thr+Ile)</b> | <b>Free Ser</b>                                            | <b>0.6039</b>  | <b>0.0645</b>    |
| <b>Free Met/(Thr+Ile)</b> | <b>Free Thr</b>                                            | <b>-0.8002</b> | <b>0.0054</b>    |
| <b>Free Met/(Thr+Ile)</b> | <b>Free Thr/Asp</b>                                        | <b>-0.8250</b> | <b>0.0033</b>    |
| <b>Free Met/(Thr+Ile)</b> | <b>Free Trp</b>                                            | <b>0.5059</b>  | <b>0.1357</b>    |
| Free Met/(Thr+Ile)        | Free Tyr                                                   | 0.3590         | 0.3084           |
| Free Met/(Thr+Ile)        | Free Val                                                   | 0.3450         | 0.3288           |
| Free Met/(Thr+Ile)        | HSDH activity with four effectors                          | 0.2513         | 0.4837           |
| Free Met/(Thr+Ile)        | HSDH activity without effectors                            | 0.2216         | 0.5384           |
| Free Met/(Thr+Ile)        | <i>LKR-SDHI</i>                                            | -0.2669        | 0.4560           |
| <b>Free Met/(Thr+Ile)</b> | <b>Lys-sensitive AK activity</b>                           | <b>-0.7805</b> | <b>0.0077</b>    |
| <b>Free Met/(Thr+Ile)</b> | <b>Lys-sensitive AK activity/Thr-sensitive AK activity</b> | <b>-0.6734</b> | <b>0.0328</b>    |
| <b>Free Met/(Thr+Ile)</b> | <b>SAMS1</b>                                               | <b>0.4289</b>  | <b>0.2162</b>    |
| Free Met/(Thr+Ile)        | <i>SAMS2</i>                                               | -0.0021        | 0.9953           |
| Free Met/(Thr+Ile)        | <i>SAMS3</i>                                               | 0.0802         | 0.8258           |
| Free Met/(Thr+Ile)        | <i>SAMS4</i>                                               | 0.2541         | 0.4787           |
| Free Met/(Thr+Ile)        | <i>SAMSs</i>                                               | 0.2535         | 0.4798           |
| Free Met/(Thr+Ile)        | <i>TD1</i>                                                 | 0.1710         | 0.6366           |
| Free Met/(Thr+Ile)        | <i>TD1/BCAT1</i>                                           | 0.2398         | 0.5046           |
| Free Met/(Thr+Ile)        | <i>THA1</i>                                                | 0.1530         | 0.6731           |
| <b>Free Met/(Thr+Ile)</b> | <b>THA2</b>                                                | <b>-0.5808</b> | <b>0.0783</b>    |
| <b>Free Met/(Thr+Ile)</b> | <b>THAs</b>                                                | <b>-0.6112</b> | <b>0.0605</b>    |
| Free Met/(Thr+Ile)        | <i>THAs+TD1</i>                                            | 0.0514         | 0.8880           |
| <b>Free Met/(Thr+Ile)</b> | <b>Thr-sensitive AK activity</b>                           | <b>0.5859</b>  | <b>0.0751</b>    |
| Free Met/(Thr+Ile)        | Total free AAs                                             | 0.0587         | 0.8720           |
| Free Met/(Thr+Ile)        | <i>TS1</i>                                                 | 0.0334         | 0.9269           |
| Free Met/(Thr+Ile)        | <i>TS1/(THAs+TD1)</i>                                      | 0.0322         | 0.9296           |
| Free Met/(Thr+Ile)        | <i>TS1/TD1</i>                                             | -0.0472        | 0.8971           |
| <b>Free Met/(Thr+Ile)</b> | <b>TS1/THAs</b>                                            | <b>0.4135</b>  | <b>0.2349</b>    |
| Free Met/Thr              | <i>(AK-HSDHs+CGS1)/SAMSs</i>                               | -0.1188        | 0.7438           |
| Free Met/Thr              | <i>(AK-HSDHs+TS1)/(THAs+TD1)</i>                           | 0.0079         | 0.9828           |
| Free Met/Thr              | <i>(AK-HSDHs+TS1+TD1)/BCAT1</i>                            | 0.1070         | 0.7686           |
| <b>Free Met/Thr</b>       | <b>(AKs+AK-HSDHs)/AK-HSDHs</b>                             | <b>-0.6218</b> | <b>0.0549</b>    |
| <b>Free Met/Thr</b>       | <b>(AKs+AK-HSDHs+CGS1)/SAMSs</b>                           | <b>-0.6396</b> | <b>0.0464</b>    |
| Free Met/Thr              | <i>(AKs+AK-HSDHs+DHDPSs)/LKR-SDHI</i>                      | -0.2778        | 0.4371           |
| Free Met/Thr              | <i>(AKs+AK-HSDHs+TS1)/(THAs+TD1)</i>                       | -0.3970        | 0.2560           |

|                     |                                                      |                |                  |
|---------------------|------------------------------------------------------|----------------|------------------|
| Free Met/Thr        | (AKs+AK-HSDHs+TS1+TD1)/BCAT1                         | 0.0817         | 0.8225           |
| <b>Free Met/Thr</b> | (AKs+DHDPSs)/LKR-SDH1                                | <b>-0.4294</b> | <b>0.2156</b>    |
| <b>Free Met/Thr</b> | <b>AK activity with four effectors</b>               | <b>-0.6709</b> | <b>0.0337</b>    |
| <b>Free Met/Thr</b> | <b>AK activity without effectors</b>                 | <b>-0.7017</b> | <b>0.0237</b>    |
| <b>Free Met/Thr</b> | <b>AK activity/HSDH activity with four effectors</b> | <b>-0.7313</b> | <b>0.0163</b>    |
| <b>Free Met/Thr</b> | <b>AK activity/HSDH activity without effectors</b>   | <b>-0.6558</b> | <b>0.0395</b>    |
| Free Met/Thr        | AK1                                                  | -0.0058        | 0.9873           |
| <b>Free Met/Thr</b> | <b>AK1+AK2</b>                                       | <b>-0.7593</b> | <b>0.0108</b>    |
| Free Met/Thr        | AK1+AK3                                              | 0.0021         | 0.9954           |
| <b>Free Met/Thr</b> | <b>AK2</b>                                           | <b>-0.7310</b> | <b>0.0163</b>    |
| <b>Free Met/Thr</b> | <b>AK2+AK3</b>                                       | <b>-0.7074</b> | <b>0.0221</b>    |
| Free Met/Thr        | AK3                                                  | 0.0245         | 0.9464           |
| Free Met/Thr        | AK-HSDH1                                             | 0.1815         | 0.6158           |
| Free Met/Thr        | AK-HSDH2                                             | 0.2452         | 0.4947           |
| Free Met/Thr        | AK-HSDHs                                             | 0.2620         | 0.4646           |
| Free Met/Thr        | AK-HSDHs+CGS1                                        | 0.1705         | 0.6377           |
| Free Met/Thr        | AK-HSDHs+TS1                                         | 0.1109         | 0.7605           |
| Free Met/Thr        | AK-HSDHs+TS1+TD1                                     | 0.1178         | 0.7458           |
| Free Met/Thr        | AK-HSDHs+TS1+THAs                                    | 0.1001         | 0.7832           |
| <b>Free Met/Thr</b> | <b>AKs</b>                                           | <b>-0.7423</b> | <b>0.0139</b>    |
| <b>Free Met/Thr</b> | <b>AKs/AK-HSDHs</b>                                  | <b>-0.6218</b> | <b>0.0549</b>    |
| <b>Free Met/Thr</b> | <b>AKs+AK-HSDHs</b>                                  | <b>-0.7026</b> | <b>0.0235</b>    |
| <b>Free Met/Thr</b> | <b>AKs+AK-HSDHs+CGS1</b>                             | <b>-0.6550</b> | <b>0.0398</b>    |
| <b>Free Met/Thr</b> | <b>AKs+AK-HSDHs+DHDPSs</b>                           | <b>-0.6904</b> | <b>0.0271</b>    |
| <b>Free Met/Thr</b> | <b>AKs+AK-HSDHs+TS1</b>                              | <b>-0.5365</b> | <b>0.1099</b>    |
| <b>Free Met/Thr</b> | <b>AKs+AK-HSDHs+TS1+TD1</b>                          | <b>-0.5108</b> | <b>0.1314</b>    |
| <b>Free Met/Thr</b> | <b>AKs+AK-HSDHs+TS1+THAs</b>                         | <b>-0.5423</b> | <b>0.1053</b>    |
| <b>Free Met/Thr</b> | <b>AKs+DHDPSs</b>                                    | <b>-0.7333</b> | <b>0.0158</b>    |
| Free Met/Thr        | BCAT1                                                | -0.2021        | 0.5755           |
| <b>Free Met/Thr</b> | <b>Biosynthetic genes analyzed</b>                   | <b>-0.4734</b> | <b>0.1670</b>    |
| Free Met/Thr        | Catabolic genes analyzed                             | 0.1977         | 0.5840           |
| Free Met/Thr        | CGS1                                                 | 0.0362         | 0.9210           |
| Free Met/Thr        | CGS1/SAMSs                                           | -0.2172        | 0.5467           |
| Free Met/Thr        | CGS1/TS1                                             | -0.0885        | 0.8078           |
| Free Met/Thr        | DHDPS1                                               | -0.0246        | 0.9461           |
| Free Met/Thr        | DHDPS2                                               | 0.2492         | 0.4874           |
| Free Met/Thr        | DHDPSs                                               | 0.1477         | 0.6838           |
| Free Met/Thr        | DHDPSs/AK-HSDHs                                      | -0.2438        | 0.4972           |
| Free Met/Thr        | DHDPSs/LKR-SDH1                                      | 0.2833         | 0.4277           |
| <b>Free Met/Thr</b> | <b>Free (Lys+Met+Thr+Ile)/Asp</b>                    | <b>-0.8010</b> | <b>0.0054</b>    |
| <b>Free Met/Thr</b> | <b>Free Ala</b>                                      | <b>0.4052</b>  | <b>0.2454</b>    |
| Free Met/Thr        | Free Arg                                             | 0.0586         | 0.8722           |
| Free Met/Thr        | Free Asn                                             | 0.1602         | 0.6585           |
| Free Met/Thr        | Free Asn+Asp                                         | 0.3662         | 0.2980           |
| <b>Free Met/Thr</b> | <b>Free Asn+Asp+Lys+Met+Thr+Ile</b>                  | <b>-0.5305</b> | <b>0.1146</b>    |
| <b>Free Met/Thr</b> | <b>Free Asn+Asp+Lys+Thr+Ile</b>                      | <b>-0.5343</b> | <b>0.1116</b>    |
| Free Met/Thr        | Free Asp                                             | 0.3863         | 0.2702           |
| <b>Free Met/Thr</b> | <b>Free Asp+Lys+Met+Thr+Ile</b>                      | <b>-0.5567</b> | <b>0.0946</b>    |
| <b>Free Met/Thr</b> | <b>Free Cys</b>                                      | <b>-0.6333</b> | <b>0.0493</b>    |
| Free Met/Thr        | Free Gln                                             | 0.1864         | 0.6061           |
| Free Met/Thr        | Free Glu                                             | 0.0421         | 0.9081           |
| Free Met/Thr        | Free Gly                                             | 0.3036         | 0.3938           |
| Free Met/Thr        | Free Gly+Ile                                         | 0.2850         | 0.4248           |
| Free Met/Thr        | Free His                                             | 0.0937         | 0.7969           |
| Free Met/Thr        | Free Ile                                             | -0.2441        | 0.4967           |
| Free Met/Thr        | Free Leu                                             | 0.3138         | 0.3773           |
| Free Met/Thr        | Free Lys                                             | 0.1599         | 0.6589           |
| <b>Free Met/Thr</b> | <b>Free Lys/(Met+Thr+Ile)</b>                        | <b>0.9546</b>  | <b>&lt;.0001</b> |

|                         |                                                            |                |                  |
|-------------------------|------------------------------------------------------------|----------------|------------------|
| <b>Free Met/Thr</b>     | <b>Free Lys/Thr</b>                                        | <b>0.9744</b>  | <b>&lt;.0001</b> |
| <b>Free Met/Thr</b>     | <b>Free Lys+Met+Thr+Ile</b>                                | <b>-0.7561</b> | <b>0.0114</b>    |
| Free Met/Thr            | Free Met                                                   | 0.3931         | 0.2611           |
| <b>Free Met/Thr</b>     | <b>Free Met+Thr+Ile</b>                                    | <b>-0.7610</b> | <b>0.0106</b>    |
| Free Met/Thr            | Free Phe                                                   | 0.3865         | 0.2700           |
| Free Met/Thr            | Free Pro                                                   | 0.2267         | 0.5289           |
| <b>Free Met/Thr</b>     | <b>Free Ser</b>                                            | <b>0.5591</b>  | <b>0.0929</b>    |
| <b>Free Met/Thr</b>     | <b>Free Thr</b>                                            | <b>-0.7634</b> | <b>0.0102</b>    |
| <b>Free Met/Thr</b>     | <b>Free Trp</b>                                            | <b>0.4334</b>  | <b>0.2108</b>    |
| Free Met/Thr            | Free Tyr                                                   | 0.3020         | 0.3964           |
| Free Met/Thr            | Free Val                                                   | 0.3531         | 0.3169           |
| Free Met/Thr            | HSDH activity with four effectors                          | 0.1205         | 0.7402           |
| Free Met/Thr            | HSDH activity without effectors                            | 0.1015         | 0.7803           |
| Free Met/Thr            | <i>LKR-SDHI</i>                                            | -0.1902        | 0.5987           |
| <b>Free Met/Thr</b>     | <b>Lys-sensitive AK activity</b>                           | <b>-0.7735</b> | <b>0.0087</b>    |
| <b>Free Met/Thr</b>     | <b>Lys-sensitive AK activity/Thr-sensitive AK activity</b> | <b>-0.6642</b> | <b>0.0362</b>    |
| <b>Free Met/Thr</b>     | <b>SAMS1</b>                                               | <b>0.4452</b>  | <b>0.1972</b>    |
| Free Met/Thr            | <i>SAMS2</i>                                               | 0.0203         | 0.9555           |
| Free Met/Thr            | <i>SAMS3</i>                                               | 0.0038         | 0.9916           |
| Free Met/Thr            | <i>SAMS4</i>                                               | 0.2290         | 0.5246           |
| Free Met/Thr            | <i>SAMSs</i>                                               | 0.2004         | 0.5787           |
| Free Met/Thr            | <i>TD1</i>                                                 | 0.1710         | 0.6366           |
| Free Met/Thr            | <i>TD1/BCAT1</i>                                           | 0.1250         | 0.7309           |
| Free Met/Thr            | <i>THA1</i>                                                | 0.2077         | 0.5648           |
| <b>Free Met/Thr</b>     | <b>THA2</b>                                                | <b>-0.5787</b> | <b>0.0797</b>    |
| <b>Free Met/Thr</b>     | <b>THAs</b>                                                | <b>-0.5917</b> | <b>0.0716</b>    |
| Free Met/Thr            | <i>THAs+TD1</i>                                            | 0.0538         | 0.8826           |
| <b>Free Met/Thr</b>     | <b>Thr-sensitive AK activity</b>                           | <b>0.6403</b>  | <b>0.0461</b>    |
| Free Met/Thr            | Total free AAs                                             | 0.0544         | 0.8813           |
| Free Met/Thr            | <i>TS1</i>                                                 | 0.0305         | 0.9333           |
| Free Met/Thr            | <i>TS1/(THAs+TD1)</i>                                      | 0.0186         | 0.9594           |
| Free Met/Thr            | <i>TS1/TD1</i>                                             | -0.0753        | 0.8362           |
| Free Met/Thr            | <i>TS1/THAs</i>                                            | 0.3619         | 0.3041           |
| Free Met+Thr+Ile        | <i>(AK-HSDHs+CGS1)/SAMSs</i>                               | -0.1173        | 0.7470           |
| Free Met+Thr+Ile        | <i>(AK-HSDHs+TS1)/(THAs+TD1)</i>                           | -0.2620        | 0.4647           |
| Free Met+Thr+Ile        | <i>(AK-HSDHs+TS1+TD1)/BCAT1</i>                            | -0.1235        | 0.7339           |
| <b>Free Met+Thr+Ile</b> | <b><i>(AKs+AK-HSDHs)/AK-HSDHs</i></b>                      | <b>0.6431</b>  | <b>0.0449</b>    |
| <b>Free Met+Thr+Ile</b> | <b><i>(AKs+AK-HSDHs+CGS1)/SAMSs</i></b>                    | <b>0.5664</b>  | <b>0.0878</b>    |
| Free Met+Thr+Ile        | <i>(AKs+AK-HSDHs+DHDPs)/LKR-SDHI</i>                       | -0.2187        | 0.5438           |
| Free Met+Thr+Ile        | <i>(AKs+AK-HSDHs+TS1)/(THAs+TD1)</i>                       | 0.0327         | 0.9285           |
| Free Met+Thr+Ile        | <i>(AKs+AK-HSDHs+TS1+TD1)/BCAT1</i>                        | -0.1032        | 0.7766           |
| Free Met+Thr+Ile        | <i>(AKs+DHDPs)/LKR-SDHI</i>                                | -0.0760        | 0.8347           |
| Free Met+Thr+Ile        | AK activity with four effectors                            | 0.2430         | 0.4987           |
| Free Met+Thr+Ile        | AK activity without effectors                              | 0.3594         | 0.3077           |
| <b>Free Met+Thr+Ile</b> | <b>AK activity/HSDH activity with four effectors</b>       | <b>0.4570</b>  | <b>0.1843</b>    |
| Free Met+Thr+Ile        | AK activity/HSDH activity without effectors                | 0.3824         | 0.2754           |
| Free Met+Thr+Ile        | <i>AK1</i>                                                 | 0.0519         | 0.8868           |
| <b>Free Met+Thr+Ile</b> | <b>AK1+AK2</b>                                             | <b>0.6188</b>  | <b>0.0565</b>    |
| Free Met+Thr+Ile        | <i>AK1+AK3</i>                                             | 0.0615         | 0.8659           |
| <b>Free Met+Thr+Ile</b> | <b>AK2</b>                                                 | <b>0.5849</b>  | <b>0.0757</b>    |
| <b>Free Met+Thr+Ile</b> | <b>AK2+AK3</b>                                             | <b>0.5703</b>  | <b>0.0852</b>    |
| Free Met+Thr+Ile        | <i>AK3</i>                                                 | 0.0029         | 0.9938           |
| Free Met+Thr+Ile        | <i>AK-HSDH1</i>                                            | -0.2737        | 0.4442           |
| <b>Free Met+Thr+Ile</b> | <b>AK-HSDH2</b>                                            | <b>-0.4616</b> | <b>0.1792</b>    |
| <b>Free Met+Thr+Ile</b> | <b>AK-HSDHs</b>                                            | <b>-0.4547</b> | <b>0.1868</b>    |
| <b>Free Met+Thr+Ile</b> | <b>AK-HSDHs+CGS1</b>                                       | <b>-0.4201</b> | <b>0.2267</b>    |
| Free Met+Thr+Ile        | <i>AK-HSDHs+TS1</i>                                        | -0.0224        | 0.9509           |
| Free Met+Thr+Ile        | <i>AK-HSDHs+TS1+TD1</i>                                    | -0.0134        | 0.9707           |

|                         |                                                            |                |                  |
|-------------------------|------------------------------------------------------------|----------------|------------------|
| Free Met+Thr+Ile        | <i>AK-HSDHs+TSI+THAs</i>                                   | -0.0102        | 0.9776           |
| <b>Free Met+Thr+Ile</b> | <b>AKs</b>                                                 | <b>0.6093</b>  | <b>0.0615</b>    |
| <b>Free Met+Thr+Ile</b> | <b>AKs/AK-HSDHs</b>                                        | <b>0.6431</b>  | <b>0.0449</b>    |
| <b>Free Met+Thr+Ile</b> | <b>AKs+AK-HSDHs</b>                                        | <b>0.5133</b>  | <b>0.1292</b>    |
| <b>Free Met+Thr+Ile</b> | <b>AKs+AK-HSDHs+CGSI</b>                                   | <b>0.4172</b>  | <b>0.2303</b>    |
| <b>Free Met+Thr+Ile</b> | <b>AKs+AK-HSDHs+DHDPSs</b>                                 | <b>0.5146</b>  | <b>0.1280</b>    |
| <b>Free Met+Thr+Ile</b> | <b>AKs+AK-HSDHs+TSI</b>                                    | <b>0.4834</b>  | <b>0.1570</b>    |
| <b>Free Met+Thr+Ile</b> | <b>AKs+AK-HSDHs+TSI+TDI</b>                                | <b>0.4725</b>  | <b>0.1679</b>    |
| <b>Free Met+Thr+Ile</b> | <b>AKs+AK-HSDHs+TSI+THAs</b>                               | <b>0.4887</b>  | <b>0.1517</b>    |
| <b>Free Met+Thr+Ile</b> | <b>AKs+DHDPSs</b>                                          | <b>0.6123</b>  | <b>0.0599</b>    |
| Free Met+Thr+Ile        | <i>BCAT1</i>                                               | 0.0132         | 0.9712           |
| Free Met+Thr+Ile        | Biosynthetic genes analyzed                                | 0.3896         | 0.2658           |
| Free Met+Thr+Ile        | Catabolic genes analyzed                                   | -0.3126        | 0.3792           |
| Free Met+Thr+Ile        | <i>CGSI</i>                                                | -0.2973        | 0.4042           |
| Free Met+Thr+Ile        | <i>CGSI/SAMSs</i>                                          | 0.1617         | 0.6553           |
| <b>Free Met+Thr+Ile</b> | <b>CGSI/TSI</b>                                            | <b>-0.4065</b> | <b>0.2437</b>    |
| <b>Free Met+Thr+Ile</b> | <b>DHDPS1</b>                                              | <b>0.5439</b>  | <b>0.1041</b>    |
| Free Met+Thr+Ile        | <i>DHDPS2</i>                                              | -0.2538        | 0.4792           |
| Free Met+Thr+Ile        | <i>DHDPSs</i>                                              | 0.1615         | 0.6558           |
| <b>Free Met+Thr+Ile</b> | <b>DHDPSs/AK-HSDHs</b>                                     | <b>0.5615</b>  | <b>0.0912</b>    |
| <b>Free Met+Thr+Ile</b> | <b>DHDPSs/LKR-SDHI</b>                                     | <b>-0.4914</b> | <b>0.1492</b>    |
| Free Met+Thr+Ile        | Free Ala                                                   | -0.1875        | 0.6039           |
| Free Met+Thr+Ile        | Free Arg                                                   | -0.0729        | 0.8414           |
| Free Met+Thr+Ile        | Free Asn                                                   | 0.0045         | 0.9901           |
| Free Met+Thr+Ile        | Free Asn+Asp                                               | -0.0914        | 0.8017           |
| <b>Free Met+Thr+Ile</b> | <b>Free Asn+Asp+Lys+Met+Thr+Ile</b>                        | <b>0.8777</b>  | <b>0.0008</b>    |
| <b>Free Met+Thr+Ile</b> | <b>Free Asn+Asp+Lys+Thr+Ile</b>                            | <b>0.8813</b>  | <b>0.0008</b>    |
| Free Met+Thr+Ile        | Free Asp                                                   | -0.1022        | 0.7788           |
| <b>Free Met+Thr+Ile</b> | <b>Free Asp+Lys+Met+Thr+Ile</b>                            | <b>0.9034</b>  | <b>0.0003</b>    |
| <b>Free Met+Thr+Ile</b> | <b>Free Cys</b>                                            | <b>0.8536</b>  | <b>0.0017</b>    |
| Free Met+Thr+Ile        | Free Gln                                                   | -0.0751        | 0.8367           |
| Free Met+Thr+Ile        | Free Glu                                                   | 0.1940         | 0.5913           |
| Free Met+Thr+Ile        | Free Gly                                                   | -0.1141        | 0.7537           |
| Free Met+Thr+Ile        | Free His                                                   | -0.0436        | 0.9049           |
| <b>Free Met+Thr+Ile</b> | <b>Free Ile</b>                                            | <b>0.4764</b>  | <b>0.1639</b>    |
| Free Met+Thr+Ile        | Free Leu                                                   | -0.1521        | 0.6748           |
| Free Met+Thr+Ile        | Free Lys                                                   | -0.0561        | 0.8777           |
| <b>Free Met+Thr+Ile</b> | <b>Free Lys+Met+Thr+Ile</b>                                | <b>0.9993</b>  | <b>&lt;.0001</b> |
| Free Met+Thr+Ile        | Free Met                                                   | -0.1507        | 0.6777           |
| Free Met+Thr+Ile        | Free Phe                                                   | -0.2886        | 0.4187           |
| Free Met+Thr+Ile        | Free Pro                                                   | -0.1322        | 0.7158           |
| <b>Free Met+Thr+Ile</b> | <b>Free Ser</b>                                            | <b>-0.4866</b> | <b>0.1538</b>    |
| <b>Free Met+Thr+Ile</b> | <b>Free Thr</b>                                            | <b>0.9998</b>  | <b>&lt;.0001</b> |
| Free Met+Thr+Ile        | Free Trp                                                   | -0.3712        | 0.2909           |
| Free Met+Thr+Ile        | Free Tyr                                                   | -0.3079        | 0.3867           |
| Free Met+Thr+Ile        | Free Val                                                   | -0.2545        | 0.4780           |
| Free Met+Thr+Ile        | HSDH activity with four effectors                          | -0.3198        | 0.3677           |
| Free Met+Thr+Ile        | HSDH activity without effectors                            | -0.1787        | 0.6212           |
| <b>Free Met+Thr+Ile</b> | <b>LKR-SDHI</b>                                            | <b>0.6434</b>  | <b>0.0448</b>    |
| <b>Free Met+Thr+Ile</b> | <b>Lys-sensitive AK activity</b>                           | <b>0.5246</b>  | <b>0.1195</b>    |
| <b>Free Met+Thr+Ile</b> | <b>Lys-sensitive AK activity/Thr-sensitive AK activity</b> | <b>0.6053</b>  | <b>0.0637</b>    |
| Free Met+Thr+Ile        | <i>SAMS1</i>                                               | -0.2381        | 0.5077           |
| Free Met+Thr+Ile        | <i>SAMS2</i>                                               | 0.3865         | 0.2700           |
| Free Met+Thr+Ile        | <i>SAMS3</i>                                               | -0.2636        | 0.4617           |
| Free Met+Thr+Ile        | <i>SAMS4</i>                                               | -0.2996        | 0.4004           |
| Free Met+Thr+Ile        | <i>SAMSs</i>                                               | -0.3177        | 0.3711           |
| Free Met+Thr+Ile        | <i>TDI</i>                                                 | 0.0389         | 0.9151           |
| Free Met+Thr+Ile        | <i>TDI/BCAT1</i>                                           | -0.1325        | 0.7151           |

|                         |                                               |                |               |
|-------------------------|-----------------------------------------------|----------------|---------------|
| Free Met+Thr+Ile        | <i>THA1</i>                                   | 0.1735         | 0.6316        |
| <b>Free Met+Thr+Ile</b> | <b><i>THA2</i></b>                            | <b>0.5228</b>  | <b>0.1210</b> |
| <b>Free Met+Thr+Ile</b> | <b><i>THAs</i></b>                            | <b>0.6047</b>  | <b>0.0640</b> |
| Free Met+Thr+Ile        | <i>THAs+TD1</i>                               | 0.1554         | 0.6682        |
| <b>Free Met+Thr+Ile</b> | <b>Thr-sensitive AK activity</b>              | <b>-0.5457</b> | <b>0.1027</b> |
| Free Met+Thr+Ile        | Total free AAs                                | 0.1910         | 0.5970        |
| Free Met+Thr+Ile        | <i>TS1</i>                                    | 0.1719         | 0.6348        |
| Free Met+Thr+Ile        | <i>TS1/(THAs+TD1)</i>                         | -0.1609        | 0.6570        |
| Free Met+Thr+Ile        | <i>TS1/TD1</i>                                | -0.2268        | 0.5286        |
| Free Met+Thr+Ile        | <i>TS1/THAs</i>                               | -0.2427        | 0.4993        |
| Free Phe                | <i>(AK-HSDHs+CGS1)/SAMSs</i>                  | -0.0678        | 0.8524        |
| <b>Free Phe</b>         | <b><i>(AK-HSDHs+TS1)/(THAs+TD1)</i></b>       | <b>-0.4056</b> | <b>0.2448</b> |
| <b>Free Phe</b>         | <b><i>(AK-HSDHs+TS1+TD1)/BCAT1</i></b>        | <b>0.5614</b>  | <b>0.0913</b> |
| <b>Free Phe</b>         | <b><i>(AKs+AK-HSDHs)/AK-HSDHs</i></b>         | <b>-0.4339</b> | <b>0.2103</b> |
| Free Phe                | <i>(AKs+AK-HSDHs+CGS1)/SAMSs</i>              | -0.3294        | 0.3527        |
| Free Phe                | <i>(AKs+AK-HSDHs+DHDPSs)/LKR-SDHI</i>         | 0.1340         | 0.7120        |
| <b>Free Phe</b>         | <b><i>(AKs+AK-HSDHs+TS1)/(THAs+TD1)</i></b>   | <b>-0.5969</b> | <b>0.0685</b> |
| <b>Free Phe</b>         | <b><i>(AKs+AK-HSDHs+TS1+TD1)/BCAT1</i></b>    | <b>0.5478</b>  | <b>0.1012</b> |
| Free Phe                | <i>(AKs+DHDPSs)/LKR-SDHI</i>                  | 0.0118         | 0.9742        |
| Free Phe                | AK activity with four effectors               | -0.0641        | 0.8603        |
| Free Phe                | AK activity without effectors                 | -0.1549        | 0.6692        |
| Free Phe                | AK activity/HSDH activity with four effectors | -0.3893        | 0.2662        |
| Free Phe                | AK activity/HSDH activity without effectors   | -0.2978        | 0.4033        |
| Free Phe                | <i>AK1</i>                                    | -0.2680        | 0.4540        |
| Free Phe                | <i>AK1+AK2</i>                                | -0.2003        | 0.5790        |
| Free Phe                | <i>AK1+AK3</i>                                | -0.0799        | 0.8263        |
| Free Phe                | <i>AK2</i>                                    | -0.1367        | 0.7065        |
| Free Phe                | <i>AK2+AK3</i>                                | -0.0971        | 0.7896        |
| Free Phe                | <i>AK3</i>                                    | 0.2133         | 0.5541        |
| Free Phe                | <i>AK-HSDH1</i>                               | 0.2352         | 0.5131        |
| <b>Free Phe</b>         | <b><i>AK-HSDH2</i></b>                        | <b>0.7088</b>  | <b>0.0217</b> |
| <b>Free Phe</b>         | <b><i>AK-HSDHs</i></b>                        | <b>0.5961</b>  | <b>0.0689</b> |
| <b>Free Phe</b>         | <b><i>AK-HSDHs+CGS1</i></b>                   | <b>0.7150</b>  | <b>0.0201</b> |
| <b>Free Phe</b>         | <b><i>AK-HSDHs+TS1</i></b>                    | <b>0.7053</b>  | <b>0.0227</b> |
| <b>Free Phe</b>         | <b><i>AK-HSDHs+TS1+TD1</i></b>                | <b>0.7407</b>  | <b>0.0143</b> |
| <b>Free Phe</b>         | <b><i>AK-HSDHs+TS1+THAs</i></b>               | <b>0.7040</b>  | <b>0.0231</b> |
| Free Phe                | <i>AKs</i>                                    | -0.1588        | 0.6613        |
| <b>Free Phe</b>         | <b><i>AKs/AK-HSDHs</i></b>                    | <b>-0.4339</b> | <b>0.2103</b> |
| Free Phe                | <i>AKs+AK-HSDHs</i>                           | -0.0072        | 0.9842        |
| Free Phe                | <i>AKs+AK-HSDHs+CGS1</i>                      | 0.1536         | 0.6718        |
| Free Phe                | <i>AKs+AK-HSDHs+DHDPSs</i>                    | 0.0239         | 0.9478        |
| Free Phe                | <i>AKs+AK-HSDHs+TS1</i>                       | 0.3052         | 0.3911        |
| Free Phe                | <i>AKs+AK-HSDHs+TS1+TD1</i>                   | 0.3514         | 0.3194        |
| Free Phe                | <i>AKs+AK-HSDHs+TS1+THAs</i>                  | 0.3019         | 0.3965        |
| Free Phe                | <i>AKs+DHDPSs</i>                             | -0.1256        | 0.7296        |
| <b>Free Phe</b>         | <b><i>BCAT1</i></b>                           | <b>-0.7791</b> | <b>0.0079</b> |
| <b>Free Phe</b>         | <b>Biosynthetic genes analyzed</b>            | <b>0.4189</b>  | <b>0.2282</b> |
| <b>Free Phe</b>         | <b>Catabolic genes analyzed</b>               | <b>0.6534</b>  | <b>0.0405</b> |
| <b>Free Phe</b>         | <b><i>CGS1</i></b>                            | <b>0.7047</b>  | <b>0.0229</b> |
| Free Phe                | <i>CGS1/SAMSs</i>                             | -0.2705        | 0.4498        |
| Free Phe                | <i>CGS1/TS1</i>                               | -0.1641        | 0.6505        |
| <b>Free Phe</b>         | <b><i>DHDPS1</i></b>                          | <b>0.4303</b>  | <b>0.2145</b> |
| <b>Free Phe</b>         | <b><i>DHDPS2</i></b>                          | <b>0.8020</b>  | <b>0.0053</b> |
| <b>Free Phe</b>         | <b><i>DHDPSs</i></b>                          | <b>0.8031</b>  | <b>0.0051</b> |
| <b>Free Phe</b>         | <b><i>DHDPSs/AK-HSDHs</i></b>                 | <b>-0.4082</b> | <b>0.2415</b> |
| <b>Free Phe</b>         | <b><i>DHDPSs/LKR-SDHI</i></b>                 | <b>0.6430</b>  | <b>0.0449</b> |
| <b>Free Phe</b>         | <b>Free Ala</b>                               | <b>0.9185</b>  | <b>0.0002</b> |



|                 |                                                     |                |                  |
|-----------------|-----------------------------------------------------|----------------|------------------|
| <b>Free Phe</b> | <b>Free Arg</b>                                     | <b>0.7635</b>  | <b>0.0102</b>    |
| <b>Free Phe</b> | <b>Free Asn</b>                                     | <b>0.8327</b>  | <b>0.0028</b>    |
| <b>Free Phe</b> | <b>Free Asp</b>                                     | <b>0.6682</b>  | <b>0.0347</b>    |
| Free Phe        | Free Cys                                            | -0.0421        | 0.9081           |
| <b>Free Phe</b> | <b>Free Gln</b>                                     | <b>0.7998</b>  | <b>0.0055</b>    |
| <b>Free Phe</b> | <b>Free Glu</b>                                     | <b>0.4322</b>  | <b>0.2122</b>    |
| <b>Free Phe</b> | <b>Free Gly</b>                                     | <b>0.6208</b>  | <b>0.0555</b>    |
| <b>Free Phe</b> | <b>Free His</b>                                     | <b>0.8886</b>  | <b>0.0006</b>    |
| <b>Free Phe</b> | <b>Free Ile</b>                                     | <b>0.5514</b>  | <b>0.0985</b>    |
| <b>Free Phe</b> | <b>Free Leu</b>                                     | <b>0.9570</b>  | <b>&lt;.0001</b> |
| <b>Free Phe</b> | <b>Free Lys</b>                                     | <b>0.8811</b>  | <b>0.0008</b>    |
| <b>Free Phe</b> | <b>Free Met</b>                                     | <b>0.6286</b>  | <b>0.0516</b>    |
| <b>Free Phe</b> | <b>HSDH activity with four effectors</b>            | <b>0.6182</b>  | <b>0.0568</b>    |
| Free Phe        | HSDH activity without effectors                     | 0.3348         | 0.3443           |
| Free Phe        | <i>LKR-SDHI</i>                                     | -0.2858        | 0.4235           |
| <b>Free Phe</b> | <b>Lys-sensitive AK activity</b>                    | <b>-0.5520</b> | <b>0.0980</b>    |
| Free Phe        | Lys-sensitive AK activity/Thr-sensitive AK activity | -0.3018        | 0.3967           |
| <b>Free Phe</b> | <b>SAMS1</b>                                        | <b>0.8246</b>  | <b>0.0033</b>    |
| <b>Free Phe</b> | <b>SAMS2</b>                                        | <b>0.7139</b>  | <b>0.0204</b>    |
| Free Phe        | <i>SAMS3</i>                                        | 0.2963         | 0.4058           |
| <b>Free Phe</b> | <b>SAMS4</b>                                        | <b>0.7362</b>  | <b>0.0152</b>    |
| <b>Free Phe</b> | <b>SAMSs</b>                                        | <b>0.6524</b>  | <b>0.0409</b>    |
| <b>Free Phe</b> | <b>TD1</b>                                          | <b>0.8891</b>  | <b>0.0006</b>    |
| <b>Free Phe</b> | <b>TD1/BCAT1</b>                                    | <b>0.6120</b>  | <b>0.0600</b>    |
| Free Phe        | <i>THA1</i>                                         | -0.3331        | 0.3469           |
| Free Phe        | <i>THA2</i>                                         | 0.0849         | 0.8157           |
| Free Phe        | <i>THAs</i>                                         | 0.0284         | 0.9380           |
| <b>Free Phe</b> | <b>THAs+TD1</b>                                     | <b>0.8679</b>  | <b>0.0011</b>    |
| Free Phe        | Thr-sensitive AK activity                           | 0.2654         | 0.4586           |
| <b>Free Phe</b> | <b>TS1</b>                                          | <b>0.6594</b>  | <b>0.0380</b>    |
| <b>Free Phe</b> | <b>TS1/(THAs+TD1)</b>                               | <b>-0.5565</b> | <b>0.0948</b>    |
| <b>Free Phe</b> | <b>TS1/TD1</b>                                      | <b>-0.5735</b> | <b>0.0830</b>    |
| <b>Free Phe</b> | <b>TS1/THAs</b>                                     | <b>0.6268</b>  | <b>0.0525</b>    |
| Free Pro        | <i>(AK-HSDHs+CGS1)/SAMSs</i>                        | -0.3673        | 0.2965           |
| <b>Free Pro</b> | <b>(AK-HSDHs+TS1)/(THAs+TD1)</b>                    | <b>-0.5963</b> | <b>0.0688</b>    |
| <b>Free Pro</b> | <b>(AK-HSDHs+TS1+TD1)/BCAT1</b>                     | <b>0.4366</b>  | <b>0.2071</b>    |
| Free Pro        | <i>(AKs+AK-HSDHs)/AK-HSDHs</i>                      | -0.1047        | 0.7734           |
| Free Pro        | <i>(AKs+AK-HSDHs+CGS1)/SAMSs</i>                    | -0.1485        | 0.6823           |
| Free Pro        | <i>(AKs+AK-HSDHs+DHDPSs)/LKR-SDHI</i>               | 0.0163         | 0.9644           |
| <b>Free Pro</b> | <b>(AKs+AK-HSDHs+TS1)/(THAs+TD1)</b>                | <b>-0.5770</b> | <b>0.0808</b>    |
| <b>Free Pro</b> | <b>(AKs+AK-HSDHs+TS1+TD1)/BCAT1</b>                 | <b>0.4431</b>  | <b>0.1997</b>    |
| Free Pro        | <i>(AKs+DHDPSs)/LKR-SDHI</i>                        | -0.0216        | 0.9527           |
| Free Pro        | AK activity with four effectors                     | -0.1933        | 0.5926           |
| <b>Free Pro</b> | <b>AK activity without effectors</b>                | <b>-0.4645</b> | <b>0.1762</b>    |
| Free Pro        | AK activity/HSDH activity with four effectors       | -0.1549        | 0.6692           |
| Free Pro        | AK activity/HSDH activity without effectors         | -0.0372        | 0.9188           |
| Free Pro        | <i>AK1</i>                                          | 0.1905         | 0.5981           |
| Free Pro        | <i>AK1+AK2</i>                                      | 0.0322         | 0.9296           |
| Free Pro        | <i>AK1+AK3</i>                                      | 0.3484         | 0.3238           |
| Free Pro        | <i>AK2</i>                                          | -0.0075        | 0.9837           |
| Free Pro        | <i>AK2+AK3</i>                                      | 0.0310         | 0.9322           |
| Free Pro        | <i>AK3</i>                                          | 0.2208         | 0.5398           |
| Free Pro        | <i>AK-HSDH1</i>                                     | -0.2488        | 0.4881           |
| <b>Free Pro</b> | <b>AK-HSDH2</b>                                     | <b>0.6595</b>  | <b>0.0380</b>    |
| Free Pro        | <i>AK-HSDHs</i>                                     | 0.2903         | 0.4158           |
| Free Pro        | <i>AK-HSDHs+CGS1</i>                                | 0.3103         | 0.3828           |
| Free Pro        | <i>AK-HSDHs+TS1</i>                                 | 0.2497         | 0.4866           |
| Free Pro        | <i>AK-HSDHs+TS1+TD1</i>                             | 0.3039         | 0.3933           |

|                 |                                                     |                |                  |
|-----------------|-----------------------------------------------------|----------------|------------------|
| Free Pro        | <i>AK-HSDHs+TSI+THAs</i>                            | 0.2440         | 0.4969           |
| Free Pro        | <i>AKs</i>                                          | 0.0723         | 0.8427           |
| Free Pro        | <i>AKs/AK-HSDHs</i>                                 | -0.1047        | 0.7734           |
| Free Pro        | <i>AKs+AK-HSDHs</i>                                 | 0.1527         | 0.6737           |
| Free Pro        | <i>AKs+AK-HSDHs+CGSI</i>                            | 0.2053         | 0.5693           |
| Free Pro        | <i>AKs+AK-HSDHs+DHDPSs</i>                          | 0.1799         | 0.6189           |
| Free Pro        | <i>AKs+AK-HSDHs+TSI</i>                             | 0.2123         | 0.5561           |
| Free Pro        | <i>AKs+AK-HSDHs+TSI+TDI</i>                         | 0.2533         | 0.4801           |
| Free Pro        | <i>AKs+AK-HSDHs+TSI+THAs</i>                        | 0.2075         | 0.5652           |
| Free Pro        | <i>AKs+DHDPSs</i>                                   | 0.1018         | 0.7795           |
| <b>Free Pro</b> | <b><i>BCATI</i></b>                                 | <b>-0.9053</b> | <b>0.0003</b>    |
| Free Pro        | Biosynthetic genes analyzed                         | 0.2595         | 0.4691           |
| <b>Free Pro</b> | <b>Catabolic genes analyzed</b>                     | <b>0.4953</b>  | <b>0.1455</b>    |
| Free Pro        | <i>CGSI</i>                                         | 0.2757         | 0.4406           |
| Free Pro        | <i>CGSI/SAMSs</i>                                   | -0.3682        | 0.2952           |
| Free Pro        | <i>CGSI/TSI</i>                                     | 0.0598         | 0.8696           |
| <b>Free Pro</b> | <b><i>DHDPS1</i></b>                                | <b>0.4681</b>  | <b>0.1724</b>    |
| <b>Free Pro</b> | <b><i>DHDPS2</i></b>                                | <b>0.6440</b>  | <b>0.0445</b>    |
| <b>Free Pro</b> | <b><i>DHDPSs</i></b>                                | <b>0.7403</b>  | <b>0.0144</b>    |
| Free Pro        | <i>DHDPSs/AK-HSDHs</i>                              | -0.0992        | 0.7852           |
| Free Pro        | <i>DHDPSs/LKR-SDHI</i>                              | 0.3721         | 0.2897           |
| <b>Free Pro</b> | <b>Free Ala</b>                                     | <b>0.7496</b>  | <b>0.0125</b>    |
| <b>Free Pro</b> | <b>Free Arg</b>                                     | <b>0.6900</b>  | <b>0.0272</b>    |
| <b>Free Pro</b> | <b>Free Asn</b>                                     | <b>0.9412</b>  | <b>&lt;.0001</b> |
| <b>Free Pro</b> | <b>Free Asp</b>                                     | <b>0.9332</b>  | <b>&lt;.0001</b> |
| Free Pro        | Free Cys                                            | 0.2949         | 0.4081           |
| <b>Free Pro</b> | <b>Free Gln</b>                                     | <b>0.9608</b>  | <b>&lt;.0001</b> |
| <b>Free Pro</b> | <b>Free Glu</b>                                     | <b>0.8370</b>  | <b>0.0025</b>    |
| <b>Free Pro</b> | <b>Free Gly</b>                                     | <b>0.8546</b>  | <b>0.0016</b>    |
| <b>Free Pro</b> | <b>Free His</b>                                     | <b>0.8222</b>  | <b>0.0035</b>    |
| Free Pro        | Free Ile                                            | 0.1855         | 0.6078           |
| <b>Free Pro</b> | <b>Free Leu</b>                                     | <b>0.7892</b>  | <b>0.0066</b>    |
| <b>Free Pro</b> | <b>Free Lys</b>                                     | <b>0.7992</b>  | <b>0.0055</b>    |
| <b>Free Pro</b> | <b>Free Met</b>                                     | <b>0.7037</b>  | <b>0.0232</b>    |
| <b>Free Pro</b> | <b>Free Phe</b>                                     | <b>0.7225</b>  | <b>0.0183</b>    |
| Free Pro        | HSDH activity with four effectors                   | 0.2111         | 0.5582           |
| Free Pro        | HSDH activity without effectors                     | -0.1551        | 0.6688           |
| Free Pro        | <i>LKR-SDHI</i>                                     | -0.1126        | 0.7569           |
| <b>Free Pro</b> | <b>Lys-sensitive AK activity</b>                    | <b>-0.6167</b> | <b>0.0575</b>    |
| Free Pro        | Lys-sensitive AK activity/Thr-sensitive AK activity | -0.1954        | 0.5885           |
| <b>Free Pro</b> | <b><i>SAMS1</i></b>                                 | <b>0.7797</b>  | <b>0.0078</b>    |
| <b>Free Pro</b> | <b><i>SAMS2</i></b>                                 | <b>0.5745</b>  | <b>0.0824</b>    |
| Free Pro        | <i>SAMS3</i>                                        | 0.1794         | 0.6199           |
| <b>Free Pro</b> | <b><i>SAMS4</i></b>                                 | <b>0.4503</b>  | <b>0.1916</b>    |
| <b>Free Pro</b> | <b><i>SAMSs</i></b>                                 | <b>0.4967</b>  | <b>0.1442</b>    |
| <b>Free Pro</b> | <b><i>TDI</i></b>                                   | <b>0.7516</b>  | <b>0.0122</b>    |
| <b>Free Pro</b> | <b><i>TDI/BCATI</i></b>                             | <b>0.4981</b>  | <b>0.1429</b>    |
| Free Pro        | <i>THA1</i>                                         | -0.3332        | 0.3469           |
| Free Pro        | <i>THA2</i>                                         | -0.1832        | 0.6124           |
| Free Pro        | <i>THAs</i>                                         | -0.1718        | 0.6352           |
| <b>Free Pro</b> | <b><i>THAs+TDI</i></b>                              | <b>0.6838</b>  | <b>0.0292</b>    |
| Free Pro        | Thr-sensitive AK activity                           | -0.1549        | 0.6691           |
| Free Pro        | <i>TSI</i>                                          | 0.1975         | 0.5844           |
| <b>Free Pro</b> | <b><i>TSI/(THAs+TDI)</i></b>                        | <b>-0.7591</b> | <b>0.0109</b>    |
| <b>Free Pro</b> | <b><i>TSI/TDI</i></b>                               | <b>-0.6815</b> | <b>0.0300</b>    |
| <b>Free Pro</b> | <b><i>TSI/THAs</i></b>                              | <b>0.5489</b>  | <b>0.1004</b>    |
| <b>Free Ser</b> | <b><i>(AK-HSDHs+CGSI)/SAMSs</i></b>                 | <b>-0.5337</b> | <b>0.1121</b>    |
| Free Ser        | <i>(AK-HSDHs+TSI)/(THAs+TDI)</i>                    | -0.2137        | 0.5533           |

|                 |                                                      |                |               |
|-----------------|------------------------------------------------------|----------------|---------------|
| Free Ser        | $(AK-HSDHs+TS1+TD1)/BCAT1$                           | 0.0521         | 0.8863        |
| <b>Free Ser</b> | $(AKs+AK-HSDHs)/AK-HSDHs$                            | <b>-0.5988</b> | <b>0.0674</b> |
| <b>Free Ser</b> | $(AKs+AK-HSDHs+CGS1)/SAMSs$                          | <b>-0.6557</b> | <b>0.0395</b> |
| Free Ser        | $(AKs+AK-HSDHs+DHDPSs)/LKR-SDHI$                     | -0.0582        | 0.8731        |
| <b>Free Ser</b> | $(AKs+AK-HSDHs+TS1)/(THAs+TD1)$                      | <b>-0.5073</b> | <b>0.1345</b> |
| Free Ser        | $(AKs+AK-HSDHs+TS1+TD1)/BCAT1$                       | 0.0297         | 0.9351        |
| Free Ser        | $(AKs+DHDPSs)/LKR-SDHI$                              | -0.2443        | 0.4963        |
| <b>Free Ser</b> | <b>AK activity with four effectors</b>               | <b>-0.4590</b> | <b>0.1820</b> |
| <b>Free Ser</b> | <b>AK activity without effectors</b>                 | <b>-0.5850</b> | <b>0.0756</b> |
| <b>Free Ser</b> | <b>AK activity/HSDH activity with four effectors</b> | <b>-0.5668</b> | <b>0.0875</b> |
| <b>Free Ser</b> | <b>AK activity/HSDH activity without effectors</b>   | <b>-0.5119</b> | <b>0.1304</b> |
| Free Ser        | <i>AK1</i>                                           | 0.2521         | 0.4823        |
| <b>Free Ser</b> | <b><i>AK1+AK2</i></b>                                | <b>-0.5906</b> | <b>0.0722</b> |
| <b>Free Ser</b> | <b><i>AK1+AK3</i></b>                                | <b>0.4363</b>  | <b>0.2074</b> |
| <b>Free Ser</b> | <b><i>AK2</i></b>                                    | <b>-0.6209</b> | <b>0.0554</b> |
| <b>Free Ser</b> | <b><i>AK2+AK3</i></b>                                | <b>-0.5579</b> | <b>0.0938</b> |
| Free Ser        | <i>AK3</i>                                           | 0.2625         | 0.4637        |
| Free Ser        | <i>AK-HSDH1</i>                                      | 0.2837         | 0.4270        |
| <b>Free Ser</b> | <b><i>AK-HSDH2</i></b>                               | <b>0.5984</b>  | <b>0.0676</b> |
| <b>Free Ser</b> | <b><i>AK-HSDHs</i></b>                               | <b>0.5479</b>  | <b>0.1011</b> |
| Free Ser        | <i>AK-HSDHs+CGS1</i>                                 | 0.3791         | 0.2800        |
| Free Ser        | <i>AK-HSDHs+TS1</i>                                  | 0.2452         | 0.4948        |
| Free Ser        | <i>AK-HSDHs+TS1+TD1</i>                              | 0.2800         | 0.4332        |
| Free Ser        | <i>AK-HSDHs+TS1+THAs</i>                             | 0.2304         | 0.5218        |
| <b>Free Ser</b> | <b><i>AKs</i></b>                                    | <b>-0.5325</b> | <b>0.1130</b> |
| <b>Free Ser</b> | <b><i>AKs/AK-HSDHs</i></b>                           | <b>-0.5988</b> | <b>0.0674</b> |
| <b>Free Ser</b> | <b><i>AKs+AK-HSDHs</i></b>                           | <b>-0.4072</b> | <b>0.2428</b> |
| Free Ser        | <i>AKs+AK-HSDHs+CGS1</i>                             | -0.3584        | 0.3092        |
| Free Ser        | <i>AKs+AK-HSDHs+DHDPSs</i>                           | -0.3842        | 0.2730        |
| Free Ser        | <i>AKs+AK-HSDHs+TS1</i>                              | -0.2833        | 0.4277        |
| Free Ser        | <i>AKs+AK-HSDHs+TS1+TD1</i>                          | -0.2396        | 0.5050        |
| Free Ser        | <i>AKs+AK-HSDHs+TS1+THAs</i>                         | -0.2915        | 0.4139        |
| <b>Free Ser</b> | <b><i>AKs+DHDPSs</i></b>                             | <b>-0.5103</b> | <b>0.1318</b> |
| <b>Free Ser</b> | <b><i>BCAT1</i></b>                                  | <b>-0.5285</b> | <b>0.1163</b> |
| Free Ser        | Biosynthetic genes analyzed                          | -0.2209        | 0.5397        |
| <b>Free Ser</b> | <b>Catabolic genes analyzed</b>                      | <b>0.6623</b>  | <b>0.0369</b> |
| Free Ser        | <i>CGS1</i>                                          | 0.1232         | 0.7345        |
| <b>Free Ser</b> | <b><i>CGS1/SAMSs</i></b>                             | <b>-0.6635</b> | <b>0.0365</b> |
| Free Ser        | <i>CGS1/TS1</i>                                      | -0.0366        | 0.9200        |
| Free Ser        | <i>DHDPS1</i>                                        | 0.2457         | 0.4939        |
| <b>Free Ser</b> | <b><i>DHDPS2</i></b>                                 | <b>0.4771</b>  | <b>0.1632</b> |
| <b>Free Ser</b> | <b><i>DHDPSs</i></b>                                 | <b>0.4957</b>  | <b>0.1452</b> |
| <b>Free Ser</b> | <b><i>DHDPSs/AK-HSDHs</i></b>                        | <b>-0.4511</b> | <b>0.1907</b> |
| <b>Free Ser</b> | <b><i>DHDPSs/LKR-SDHI</i></b>                        | <b>0.5430</b>  | <b>0.1048</b> |
| <b>Free Ser</b> | <b>Free Ala</b>                                      | <b>0.6682</b>  | <b>0.0347</b> |
| Free Ser        | Free Arg                                             | 0.3670         | 0.2968        |
| <b>Free Ser</b> | <b>Free Asn</b>                                      | <b>0.5925</b>  | <b>0.0711</b> |
| <b>Free Ser</b> | <b>Free Asp</b>                                      | <b>0.6977</b>  | <b>0.0249</b> |
| Free Ser        | Free Cys                                             | -0.1337        | 0.7128        |
| <b>Free Ser</b> | <b>Free Gln</b>                                      | <b>0.7087</b>  | <b>0.0218</b> |
| Free Ser        | Free Glu                                             | 0.3331         | 0.3470        |
| <b>Free Ser</b> | <b>Free Gly</b>                                      | <b>0.8586</b>  | <b>0.0015</b> |
| <b>Free Ser</b> | <b>Free His</b>                                      | <b>0.4576</b>  | <b>0.1836</b> |
| Free Ser        | Free Ile                                             | -0.0629        | 0.8629        |
| <b>Free Ser</b> | <b>Free Leu</b>                                      | <b>0.4998</b>  | <b>0.1413</b> |
| Free Ser        | Free Lys                                             | 0.3572         | 0.3109        |
| Free Ser        | Free Met                                             | 0.2802         | 0.4329        |
| <b>Free Ser</b> | <b>Free Phe</b>                                      | <b>0.5961</b>  | <b>0.0689</b> |

|                 |                                                            |                |               |
|-----------------|------------------------------------------------------------|----------------|---------------|
| <b>Free Ser</b> | <b>Free Pro</b>                                            | <b>0.6747</b>  | <b>0.0323</b> |
| Free Ser        | HSDH activity with four effectors                          | 0.3113         | 0.3812        |
| Free Ser        | HSDH activity without effectors                            | 0.1392         | 0.7014        |
| Free Ser        | <i>LKR-SDHI</i>                                            | -0.3053        | 0.3911        |
| <b>Free Ser</b> | <b>Lys-sensitive AK activity</b>                           | <b>-0.8525</b> | <b>0.0017</b> |
| <b>Free Ser</b> | <b>Lys-sensitive AK activity/Thr-sensitive AK activity</b> | <b>-0.5818</b> | <b>0.0777</b> |
| Free Ser        | <i>SAMS1</i>                                               | <b>0.6991</b>  | <b>0.0245</b> |
| Free Ser        | <i>SAMS2</i>                                               | 0.3103         | 0.3829        |
| <b>Free Ser</b> | <b><i>SAMS3</i></b>                                        | <b>0.4282</b>  | <b>0.2170</b> |
| <b>Free Ser</b> | <b><i>SAMS4</i></b>                                        | <b>0.5827</b>  | <b>0.0771</b> |
| <b>Free Ser</b> | <b><i>SAMSs</i></b>                                        | <b>0.6650</b>  | <b>0.0359</b> |
| <b>Free Ser</b> | <b><i>TD1</i></b>                                          | <b>0.5618</b>  | <b>0.0910</b> |
| Free Ser        | <i>TD1/BCAT1</i>                                           | 0.1183         | 0.7449        |
| Free Ser        | <i>THA1</i>                                                | -0.1520        | 0.6750        |
| <b>Free Ser</b> | <b><i>THA2</i></b>                                         | <b>-0.6183</b> | <b>0.0567</b> |
| <b>Free Ser</b> | <b><i>THAs</i></b>                                         | <b>-0.6722</b> | <b>0.0332</b> |
| <b>Free Ser</b> | <b><i>THAs+TD1</i></b>                                     | <b>0.4134</b>  | <b>0.2351</b> |
| Free Ser        | Thr-sensitive AK activity                                  | 0.2324         | 0.5183        |
| Free Ser        | <i>TS1</i>                                                 | 0.0766         | 0.8333        |
| <b>Free Ser</b> | <b><i>TS1/(THAs+TD1)</i></b>                               | <b>-0.4093</b> | <b>0.2402</b> |
| Free Ser        | <i>TS1/TD1</i>                                             | -0.3213        | 0.3653        |
| <b>Free Ser</b> | <b><i>TS1/THAs</i></b>                                     | <b>0.8501</b>  | <b>0.0018</b> |
| Free Thr        | <i>(AK-HSDHs+CGS1)/SAMSs</i>                               | -0.1176        | 0.7464        |
| Free Thr        | <i>(AK-HSDHs+TS1)/(THAs+TD1)</i>                           | -0.2483        | 0.4891        |
| Free Thr        | <i>(AK-HSDHs+TS1+TD1)/BCAT1</i>                            | -0.1395        | 0.7007        |
| <b>Free Thr</b> | <b><i>(AKs+AK-HSDHs)/AK-HSDHs</i></b>                      | <b>0.6460</b>  | <b>0.0436</b> |
| <b>Free Thr</b> | <b><i>(AKs+AK-HSDHs+CGS1)/SAMSs</i></b>                    | <b>0.5686</b>  | <b>0.0863</b> |
| Free Thr        | <i>(AKs+AK-HSDHs+DHDPSs)/LKR-SDHI</i>                      | -0.2163        | 0.5484        |
| Free Thr        | <i>(AKs+AK-HSDHs+TS1)/(THAs+TD1)</i>                       | 0.0477         | 0.8959        |
| Free Thr        | <i>(AKs+AK-HSDHs+TS1+TD1)/BCAT1</i>                        | -0.1191        | 0.7432        |
| Free Thr        | <i>(AKs+DHDPSs)/LKR-SDHI</i>                               | -0.0728        | 0.8415        |
| Free Thr        | AK activity with four effectors                            | 0.2443         | 0.4963        |
| Free Thr        | AK activity without effectors                              | 0.3615         | 0.3047        |
| <b>Free Thr</b> | <b>AK activity/HSDH activity with four effectors</b>       | <b>0.4632</b>  | <b>0.1776</b> |
| Free Thr        | AK activity/HSDH activity without effectors                | 0.3881         | 0.2678        |
| Free Thr        | <i>AK1</i>                                                 | 0.0579         | 0.8738        |
| <b>Free Thr</b> | <b><i>AK1+AK2</i></b>                                      | <b>0.6184</b>  | <b>0.0567</b> |
| Free Thr        | <i>AK1+AK3</i>                                             | 0.0701         | 0.8473        |
| <b>Free Thr</b> | <b><i>AK2</i></b>                                          | <b>0.5832</b>  | <b>0.0768</b> |
| <b>Free Thr</b> | <b><i>AK2+AK3</i></b>                                      | <b>0.5694</b>  | <b>0.0858</b> |
| Free Thr        | <i>AK3</i>                                                 | 0.0068         | 0.9852        |
| Free Thr        | <i>AK-HSDH1</i>                                            | -0.2733        | 0.4449        |
| <b>Free Thr</b> | <b><i>AK-HSDH2</i></b>                                     | <b>-0.4690</b> | <b>0.1715</b> |
| <b>Free Thr</b> | <b><i>AK-HSDHs</i></b>                                     | <b>-0.4593</b> | <b>0.1818</b> |
| <b>Free Thr</b> | <b><i>AK-HSDHs+CGS1</i></b>                                | <b>-0.4296</b> | <b>0.2153</b> |
| Free Thr        | <i>AK-HSDHs+TS1</i>                                        | -0.0322        | 0.9297        |
| Free Thr        | <i>AK-HSDHs+TS1+TD1</i>                                    | -0.0240        | 0.9476        |
| Free Thr        | <i>AK-HSDHs+TS1+THAs</i>                                   | -0.0201        | 0.9561        |
| <b>Free Thr</b> | <b><i>AKs</i></b>                                          | <b>0.6097</b>  | <b>0.0613</b> |
| <b>Free Thr</b> | <b><i>AKs/AK-HSDHs</i></b>                                 | <b>0.6460</b>  | <b>0.0436</b> |
| <b>Free Thr</b> | <b><i>AKs+AK-HSDHs</i></b>                                 | <b>0.5124</b>  | <b>0.1299</b> |
| <b>Free Thr</b> | <b><i>AKs+AK-HSDHs+CGS1</i></b>                            | <b>0.4134</b>  | <b>0.2350</b> |
| <b>Free Thr</b> | <b><i>AKs+AK-HSDHs+DHDPSs</i></b>                          | <b>0.5131</b>  | <b>0.1293</b> |
| <b>Free Thr</b> | <b><i>AKs+AK-HSDHs+TS1</i></b>                             | <b>0.4777</b>  | <b>0.1626</b> |
| <b>Free Thr</b> | <b><i>AKs+AK-HSDHs+TS1+TD1</i></b>                         | <b>0.4659</b>  | <b>0.1747</b> |
| <b>Free Thr</b> | <b><i>AKs+AK-HSDHs+TS1+THAs</i></b>                        | <b>0.4830</b>  | <b>0.1573</b> |
| <b>Free Thr</b> | <b><i>AKs+DHDPSs</i></b>                                   | <b>0.6120</b>  | <b>0.0600</b> |

|                           |                                                            |                |               |
|---------------------------|------------------------------------------------------------|----------------|---------------|
| Free Thr                  | <i>BCAT1</i>                                               | 0.0304         | 0.9336        |
| Free Thr                  | Biosynthetic genes analyzed                                | 0.3818         | 0.2763        |
| Free Thr                  | Catabolic genes analyzed                                   | -0.3212        | 0.3656        |
| Free Thr                  | <i>CGS1</i>                                                | -0.3102        | 0.3831        |
| Free Thr                  | <i>CGS1/SAMSs</i>                                          | 0.1615         | 0.6558        |
| <b>Free Thr</b>           | <b><i>CGS1/TS1</i></b>                                     | <b>-0.4054</b> | <b>0.2451</b> |
| <b>Free Thr</b>           | <b><i>DHDPS1</i></b>                                       | <b>0.5316</b>  | <b>0.1138</b> |
| Free Thr                  | <i>DHDPS2</i>                                              | -0.2656        | 0.4583        |
| Free Thr                  | <i>DHDPSs</i>                                              | 0.1463         | 0.6867        |
| <b>Free Thr</b>           | <b><i>DHDPSs/AK-HSDHs</i></b>                              | <b>0.5634</b>  | <b>0.0899</b> |
| <b>Free Thr</b>           | <b><i>DHDPSs/LKR-SDHI</i></b>                              | <b>-0.4984</b> | <b>0.1426</b> |
| Free Thr                  | Free Ala                                                   | -0.2035        | 0.5729        |
| Free Thr                  | Free Arg                                                   | -0.0869        | 0.8113        |
| Free Thr                  | Free Asn                                                   | -0.0109        | 0.9761        |
| Free Thr                  | Free Asp                                                   | -0.1148        | 0.7523        |
| <b>Free Thr</b>           | <b>Free Cys</b>                                            | <b>0.8476</b>  | <b>0.0020</b> |
| Free Thr                  | Free Gln                                                   | -0.0898        | 0.8051        |
| Free Thr                  | Free Glu                                                   | 0.1861         | 0.6067        |
| Free Thr                  | Free Gly                                                   | -0.1251        | 0.7305        |
| Free Thr                  | Free His                                                   | -0.0599        | 0.8695        |
| <b>Free Thr</b>           | <b>Free Ile</b>                                            | <b>0.4603</b>  | <b>0.1807</b> |
| Free Thr                  | Free Leu                                                   | -0.1717        | 0.6353        |
| Free Thr                  | Free Lys                                                   | -0.0759        | 0.8350        |
| Free Thr                  | Free Met                                                   | -0.1667        | 0.6454        |
| Free Thr                  | Free Phe                                                   | -0.3066        | 0.3889        |
| Free Thr                  | Free Pro                                                   | -0.1459        | 0.6876        |
| <b>Free Thr</b>           | <b>Free Ser</b>                                            | <b>-0.4938</b> | <b>0.1469</b> |
| Free Thr                  | HSDH activity with four effectors                          | -0.3306        | 0.3508        |
| Free Thr                  | HSDH activity without effectors                            | -0.1861        | 0.6067        |
| <b>Free Thr</b>           | <b><i>LKR-SDHI</i></b>                                     | <b>0.6443</b>  | <b>0.0443</b> |
| <b>Free Thr</b>           | <b>Lys-sensitive AK activity</b>                           | <b>0.5327</b>  | <b>0.1129</b> |
| <b>Free Thr</b>           | <b>Lys-sensitive AK activity/Thr-sensitive AK activity</b> | <b>0.6063</b>  | <b>0.0631</b> |
| Free Thr                  | <i>SAMS1</i>                                               | -0.2530        | 0.4806        |
| Free Thr                  | <i>SAMS2</i>                                               | 0.3718         | 0.2901        |
| Free Thr                  | <i>SAMS3</i>                                               | -0.2654        | 0.4586        |
| Free Thr                  | <i>SAMS4</i>                                               | -0.3088        | 0.3854        |
| Free Thr                  | <i>SAMSs</i>                                               | -0.3262        | 0.3577        |
| Free Thr                  | <i>TD1</i>                                                 | 0.0229         | 0.9499        |
| Free Thr                  | <i>TD1/BCAT1</i>                                           | -0.1493        | 0.6805        |
| Free Thr                  | <i>THA1</i>                                                | 0.1780         | 0.6228        |
| <b>Free Thr</b>           | <b><i>THA2</i></b>                                         | <b>0.5148</b>  | <b>0.1279</b> |
| <b>Free Thr</b>           | <b><i>THAs</i></b>                                         | <b>0.5977</b>  | <b>0.0680</b> |
| Free Thr                  | <i>THAs+TD1</i>                                            | 0.1385         | 0.7028        |
| <b>Free Thr</b>           | <b>Thr-sensitive AK activity</b>                           | <b>-0.5430</b> | <b>0.1048</b> |
| Free Thr                  | <i>TS1</i>                                                 | 0.1613         | 0.6562        |
| Free Thr                  | <i>TS1/(THAs+TD1)</i>                                      | -0.1462        | 0.6870        |
| Free Thr                  | <i>TS1/TD1</i>                                             | -0.2107        | 0.5591        |
| Free Thr                  | <i>TS1/THAs</i>                                            | -0.2502        | 0.4858        |
| Free Thr/(Gly+Ile)        | <i>(AK-HSDHs+CGS1)/SAMSs</i>                               | -0.0043        | 0.9905        |
| Free Thr/(Gly+Ile)        | <i>(AK-HSDHs+TS1)/(THAs+TD1)</i>                           | -0.1644        | 0.6499        |
| Free Thr/(Gly+Ile)        | <i>(AK-HSDHs+TS1+TD1)/BCAT1</i>                            | -0.2039        | 0.5721        |
| <b>Free Thr/(Gly+Ile)</b> | <b><i>(AKs+AK-HSDHs)/AK-HSDHs</i></b>                      | <b>0.6651</b>  | <b>0.0359</b> |
| <b>Free Thr/(Gly+Ile)</b> | <b><i>(AKs+AK-HSDHs+CGS1)/SAMSs</i></b>                    | <b>0.5659</b>  | <b>0.0882</b> |
| Free Thr/(Gly+Ile)        | <i>(AKs+AK-HSDHs+DHDPSs)/LKR-SDHI</i>                      | -0.2058        | 0.5684        |
| Free Thr/(Gly+Ile)        | <i>(AKs+AK-HSDHs+TS1)/(THAs+TD1)</i>                       | 0.1259         | 0.7289        |
| Free Thr/(Gly+Ile)        | <i>(AKs+AK-HSDHs+TS1+TD1)/BCAT1</i>                        | -0.1853        | 0.6083        |
| Free Thr/(Gly+Ile)        | <i>(AKs+DHDPSs)/LKR-SDHI</i>                               | -0.0555        | 0.8790        |

|                           |                                                      |                |                  |
|---------------------------|------------------------------------------------------|----------------|------------------|
| Free Thr/(Gly+Ile)        | AK activity with four effectors                      | 0.3145         | 0.3762           |
| <b>Free Thr/(Gly+Ile)</b> | <b>AK activity without effectors</b>                 | <b>0.4782</b>  | <b>0.1621</b>    |
| <b>Free Thr/(Gly+Ile)</b> | <b>AK activity/HSDH activity with four effectors</b> | <b>0.5001</b>  | <b>0.1411</b>    |
| <b>Free Thr/(Gly+Ile)</b> | <b>AK activity/HSDH activity without effectors</b>   | <b>0.4077</b>  | <b>0.2421</b>    |
| Free Thr/(Gly+Ile)        | <i>AK1</i>                                           | -0.0099        | 0.9783           |
| <b>Free Thr/(Gly+Ile)</b> | <b><i>AK1+AK2</i></b>                                | <b>0.5753</b>  | <b>0.0818</b>    |
| Free Thr/(Gly+Ile)        | <i>AK1+AK3</i>                                       | -0.0392        | 0.9144           |
| <b>Free Thr/(Gly+Ile)</b> | <b><i>AK2</i></b>                                    | <b>0.5559</b>  | <b>0.0952</b>    |
| <b>Free Thr/(Gly+Ile)</b> | <b><i>AK2+AK3</i></b>                                | <b>0.5321</b>  | <b>0.1134</b>    |
| Free Thr/(Gly+Ile)        | <i>AK3</i>                                           | -0.0517        | 0.8872           |
| Free Thr/(Gly+Ile)        | <i>AK-HSDH1</i>                                      | -0.2477        | 0.4903           |
| <b>Free Thr/(Gly+Ile)</b> | <b><i>AK-HSDH2</i></b>                               | <b>-0.5856</b> | <b>0.0753</b>    |
| <b>Free Thr/(Gly+Ile)</b> | <b><i>AK-HSDHs</i></b>                               | <b>-0.5209</b> | <b>0.1227</b>    |
| <b>Free Thr/(Gly+Ile)</b> | <b><i>AK-HSDHs+CGS1</i></b>                          | <b>-0.4458</b> | <b>0.1966</b>    |
| Free Thr/(Gly+Ile)        | <i>AK-HSDHs+TS1</i>                                  | -0.1177        | 0.7462           |
| Free Thr/(Gly+Ile)        | <i>AK-HSDHs+TS1+TD1</i>                              | -0.1190        | 0.7433           |
| Free Thr/(Gly+Ile)        | <i>AK-HSDHs+TS1+THAs</i>                             | -0.1034        | 0.7762           |
| <b>Free Thr/(Gly+Ile)</b> | <b><i>AKs</i></b>                                    | <b>0.5566</b>  | <b>0.0947</b>    |
| <b>Free Thr/(Gly+Ile)</b> | <b><i>AKs/AK-HSDHs</i></b>                           | <b>0.6651</b>  | <b>0.0359</b>    |
| <b>Free Thr/(Gly+Ile)</b> | <b><i>AKs+AK-HSDHs</i></b>                           | <b>0.4410</b>  | <b>0.2020</b>    |
| Free Thr/(Gly+Ile)        | <i>AKs+AK-HSDHs+CGS1</i>                             | 0.3538         | 0.3159           |
| <b>Free Thr/(Gly+Ile)</b> | <b><i>AKs+AK-HSDHs+DHDPSs</i></b>                    | <b>0.4344</b>  | <b>0.2097</b>    |
| Free Thr/(Gly+Ile)        | <i>AKs+AK-HSDHs+TS1</i>                              | 0.3817         | 0.2764           |
| Free Thr/(Gly+Ile)        | <i>AKs+AK-HSDHs+TS1+TD1</i>                          | 0.3626         | 0.3032           |
| Free Thr/(Gly+Ile)        | <i>AKs+AK-HSDHs+TS1+THAs</i>                         | 0.3891         | 0.2664           |
| <b>Free Thr/(Gly+Ile)</b> | <b><i>AKs+DHDPSs</i></b>                             | <b>0.5510</b>  | <b>0.0988</b>    |
| Free Thr/(Gly+Ile)        | <i>BCAT1</i>                                         | 0.1869         | 0.6052           |
| Free Thr/(Gly+Ile)        | Biosynthetic genes analyzed                          | 0.2950         | 0.4080           |
| Free Thr/(Gly+Ile)        | Catabolic genes analyzed                             | -0.3953        | 0.2583           |
| Free Thr/(Gly+Ile)        | <i>CGS1</i>                                          | -0.2769        | 0.4386           |
| Free Thr/(Gly+Ile)        | <i>CGS1/SAMSs</i>                                    | 0.2842         | 0.4262           |
| Free Thr/(Gly+Ile)        | <i>CGS1/TS1</i>                                      | -0.2850        | 0.4248           |
| Free Thr/(Gly+Ile)        | <i>DHDPS1</i>                                        | 0.3586         | 0.3089           |
| Free Thr/(Gly+Ile)        | <i>DHDPS2</i>                                        | -0.3988        | 0.2536           |
| Free Thr/(Gly+Ile)        | <i>DHDPSs</i>                                        | -0.0546        | 0.8809           |
| <b>Free Thr/(Gly+Ile)</b> | <b><i>DHDPSs/AK-HSDHs</i></b>                        | <b>0.5745</b>  | <b>0.0824</b>    |
| <b>Free Thr/(Gly+Ile)</b> | <b><i>DHDPSs/LKR-SDHI</i></b>                        | <b>-0.5542</b> | <b>0.0964</b>    |
| <b>Free Thr/(Gly+Ile)</b> | <b>Free (Lys+Met+Thr+Ile)/Asp</b>                    | <b>0.9421</b>  | <b>&lt;.0001</b> |
| Free Thr/(Gly+Ile)        | Free Ala                                             | -0.3584        | 0.3092           |
| Free Thr/(Gly+Ile)        | Free Arg                                             | -0.1753        | 0.6281           |
| Free Thr/(Gly+Ile)        | Free Asn                                             | -0.1868        | 0.6052           |
| Free Thr/(Gly+Ile)        | Free Asn+Asp                                         | -0.2918        | 0.4134           |
| <b>Free Thr/(Gly+Ile)</b> | <b>Free Asn+Asp+Lys+Met+Thr+Ile</b>                  | <b>0.7494</b>  | <b>0.0126</b>    |
| <b>Free Thr/(Gly+Ile)</b> | <b>Free Asn+Asp+Lys+Thr+Ile</b>                      | <b>0.7537</b>  | <b>0.0118</b>    |
| Free Thr/(Gly+Ile)        | Free Asp                                             | -0.2991        | 0.4011           |
| <b>Free Thr/(Gly+Ile)</b> | <b>Free Asp+Lys+Met+Thr+Ile</b>                      | <b>0.7848</b>  | <b>0.0072</b>    |
| <b>Free Thr/(Gly+Ile)</b> | <b>Free Cys</b>                                      | <b>0.7387</b>  | <b>0.0147</b>    |
| Free Thr/(Gly+Ile)        | Free Gln                                             | -0.2549        | 0.4773           |
| Free Thr/(Gly+Ile)        | Free Glu                                             | 0.0032         | 0.9931           |
| Free Thr/(Gly+Ile)        | Free Gly                                             | -0.3137        | 0.3774           |
| <b>Free Thr/(Gly+Ile)</b> | <b>Free Gly/Thr</b>                                  | <b>-0.8151</b> | <b>0.0041</b>    |
| Free Thr/(Gly+Ile)        | Free Gly+Ile                                         | -0.2830        | 0.4282           |
| Free Thr/(Gly+Ile)        | Free His                                             | -0.1815        | 0.6159           |
| <b>Free Thr/(Gly+Ile)</b> | <b>Free Ile</b>                                      | <b>0.4341</b>  | <b>0.2101</b>    |
| <b>Free Thr/(Gly+Ile)</b> | <b>Free Ile/Thr</b>                                  | <b>-0.8477</b> | <b>0.0020</b>    |
| Free Thr/(Gly+Ile)        | Free Leu                                             | -0.3071        | 0.3881           |
| Free Thr/(Gly+Ile)        | Free Lys                                             | -0.1960        | 0.5874           |
| <b>Free Thr/(Gly+Ile)</b> | <b>Free Lys/(Met+Thr+Ile)</b>                        | <b>-0.9071</b> | <b>0.0003</b>    |

|                           |                                                            |                |                  |
|---------------------------|------------------------------------------------------------|----------------|------------------|
| Free Thr/(Gly+Ile)        | Free Lys/Asp                                               | 0.2472         | 0.4911           |
| <b>Free Thr/(Gly+Ile)</b> | <b>Free Lys/Thr</b>                                        | <b>-0.8664</b> | <b>0.0012</b>    |
| <b>Free Thr/(Gly+Ile)</b> | <b>Free Lys+Met+Thr+Ile</b>                                | <b>0.9584</b>  | <b>&lt;.0001</b> |
| Free Thr/(Gly+Ile)        | Free Met                                                   | -0.2455        | 0.4942           |
| <b>Free Thr/(Gly+Ile)</b> | <b>Free Met/(Thr+Ile)</b>                                  | <b>-0.8507</b> | <b>0.0018</b>    |
| <b>Free Thr/(Gly+Ile)</b> | <b>Free Met/Thr</b>                                        | <b>-0.8140</b> | <b>0.0042</b>    |
| <b>Free Thr/(Gly+Ile)</b> | <b>Free Met+Thr+Ile</b>                                    | <b>0.9643</b>  | <b>&lt;.0001</b> |
| <b>Free Thr/(Gly+Ile)</b> | <b>Free Phe</b>                                            | <b>-0.4293</b> | <b>0.2157</b>    |
| Free Thr/(Gly+Ile)        | Free Pro                                                   | -0.3275        | 0.3556           |
| <b>Free Thr/(Gly+Ile)</b> | <b>Free Ser</b>                                            | <b>-0.6290</b> | <b>0.0514</b>    |
| <b>Free Thr/(Gly+Ile)</b> | <b>Free Thr</b>                                            | <b>0.9665</b>  | <b>&lt;.0001</b> |
| <b>Free Thr/(Gly+Ile)</b> | <b>Free Thr/Asp</b>                                        | <b>0.9465</b>  | <b>&lt;.0001</b> |
| <b>Free Thr/(Gly+Ile)</b> | <b>Free Trp</b>                                            | <b>-0.5008</b> | <b>0.1403</b>    |
| Free Thr/(Gly+Ile)        | Free Tyr                                                   | -0.3447        | 0.3294           |
| Free Thr/(Gly+Ile)        | Free Val                                                   | -0.3622        | 0.3037           |
| Free Thr/(Gly+Ile)        | HSDH activity with four effectors                          | -0.3361        | 0.3423           |
| Free Thr/(Gly+Ile)        | HSDH activity without effectors                            | -0.1358        | 0.7084           |
| <b>Free Thr/(Gly+Ile)</b> | <b>LKR-SDHI</b>                                            | <b>0.5880</b>  | <b>0.0738</b>    |
| <b>Free Thr/(Gly+Ile)</b> | <b>Lys-sensitive AK activity</b>                           | <b>0.6336</b>  | <b>0.0492</b>    |
| <b>Free Thr/(Gly+Ile)</b> | <b>Lys-sensitive AK activity/Thr-sensitive AK activity</b> | <b>0.7250</b>  | <b>0.0177</b>    |
| Free Thr/(Gly+Ile)        | SAMS1                                                      | -0.3771        | 0.2827           |
| Free Thr/(Gly+Ile)        | SAMS2                                                      | 0.2162         | 0.5486           |
| Free Thr/(Gly+Ile)        | SAMS3                                                      | -0.2842        | 0.4261           |
| Free Thr/(Gly+Ile)        | SAMS4                                                      | -0.3818        | 0.2763           |
| <b>Free Thr/(Gly+Ile)</b> | <b>SAMSs</b>                                               | <b>-0.4000</b> | <b>0.2520</b>    |
| Free Thr/(Gly+Ile)        | TD1                                                        | -0.1389        | 0.7019           |
| Free Thr/(Gly+Ile)        | TD1/BCAT1                                                  | -0.2250        | 0.5321           |
| Free Thr/(Gly+Ile)        | THA1                                                       | 0.1328         | 0.7146           |
| <b>Free Thr/(Gly+Ile)</b> | <b>THA2</b>                                                | <b>0.6179</b>  | <b>0.0569</b>    |
| <b>Free Thr/(Gly+Ile)</b> | <b>THAs</b>                                                | <b>0.6812</b>  | <b>0.0301</b>    |
| Free Thr/(Gly+Ile)        | THAs+TD1                                                   | 0.0000         | 1.0000           |
| <b>Free Thr/(Gly+Ile)</b> | <b>Thr-sensitive AK activity</b>                           | <b>-0.5617</b> | <b>0.0911</b>    |
| Free Thr/(Gly+Ile)        | Total free AAs                                             | -0.0163        | 0.9645           |
| Free Thr/(Gly+Ile)        | TS1                                                        | 0.0762         | 0.8342           |
| Free Thr/(Gly+Ile)        | TS1/(THAs+TD1)                                             | -0.0353        | 0.9228           |
| Free Thr/(Gly+Ile)        | TS1/TD1                                                    | -0.0890        | 0.8068           |
| <b>Free Thr/(Gly+Ile)</b> | <b>TS1/THAs</b>                                            | <b>-0.4022</b> | <b>0.2493</b>    |
| Free Thr/Asp              | (AK-HSDHs+CGS1)/SAMSs                                      | -0.1417        | 0.6962           |
| Free Thr/Asp              | (AK-HSDHs+TS1)/(THAs+TD1)                                  | -0.0389        | 0.9150           |
| Free Thr/Asp              | (AK-HSDHs+TS1+TD1)/BCAT1                                   | -0.2125        | 0.5557           |
| <b>Free Thr/Asp</b>       | <b>(AKs+AK-HSDHs)/AK-HSDHs</b>                             | <b>0.4972</b>  | <b>0.1438</b>    |
| <b>Free Thr/Asp</b>       | <b>(AKs+AK-HSDHs+CGS1)/SAMSs</b>                           | <b>0.4022</b>  | <b>0.2492</b>    |
| Free Thr/Asp              | (AKs+AK-HSDHs+DHDPSs)/LKR-SDHI                             | -0.1116        | 0.7589           |
| Free Thr/Asp              | (AKs+AK-HSDHs+TS1)/(THAs+TD1)                              | 0.1817         | 0.6154           |
| Free Thr/Asp              | (AKs+AK-HSDHs+TS1+TD1)/BCAT1                               | -0.1997        | 0.5803           |
| Free Thr/Asp              | (AKs+DHDPSs)/LKR-SDHI                                      | 0.0158         | 0.9655           |
| <b>Free Thr/Asp</b>       | <b>AK activity with four effectors</b>                     | <b>0.4028</b>  | <b>0.2485</b>    |
| <b>Free Thr/Asp</b>       | <b>AK activity without effectors</b>                       | <b>0.5658</b>  | <b>0.0882</b>    |
| <b>Free Thr/Asp</b>       | <b>AK activity/HSDH activity with four effectors</b>       | <b>0.5760</b>  | <b>0.0814</b>    |
| Free Thr/Asp              | AK activity/HSDH activity without effectors                | 0.3952         | 0.2583           |
| Free Thr/Asp              | AK1                                                        | 0.0472         | 0.8970           |
| <b>Free Thr/Asp</b>       | <b>AK1+AK2</b>                                             | <b>0.5071</b>  | <b>0.1347</b>    |
| Free Thr/Asp              | AK1+AK3                                                    | -0.1203        | 0.7406           |
| <b>Free Thr/Asp</b>       | <b>AK2</b>                                                 | <b>0.4783</b>  | <b>0.1620</b>    |
| <b>Free Thr/Asp</b>       | <b>AK2+AK3</b>                                             | <b>0.4273</b>  | <b>0.2180</b>    |
| Free Thr/Asp              | AK3                                                        | -0.2219        | 0.5377           |
| Free Thr/Asp              | AK-HSDH1                                                   | -0.0802        | 0.8257           |
| <b>Free Thr/Asp</b>       | <b>AK-HSDH2</b>                                            | <b>-0.5631</b> | <b>0.0901</b>    |

|                     |                                     |                |                  |
|---------------------|-------------------------------------|----------------|------------------|
| <b>Free Thr/Asp</b> | <b>AK-HSDHs</b>                     | <b>-0.4119</b> | <b>0.2369</b>    |
| Free Thr/Asp        | AK-HSDHs+CGSI                       | -0.3607        | 0.3059           |
| Free Thr/Asp        | AK-HSDHs+TSI                        | -0.0608        | 0.8674           |
| Free Thr/Asp        | AK-HSDHs+TSI+TDI                    | -0.0709        | 0.8456           |
| Free Thr/Asp        | AK-HSDHs+TSI+THAs                   | -0.0495        | 0.8920           |
| <b>Free Thr/Asp</b> | <b>AKs</b>                          | <b>0.4585</b>  | <b>0.1826</b>    |
| <b>Free Thr/Asp</b> | <b>AKs/AK-HSDHs</b>                 | <b>0.4972</b>  | <b>0.1438</b>    |
| Free Thr/Asp        | AKs+AK-HSDHs                        | 0.3679         | 0.2956           |
| Free Thr/Asp        | AKs+AK-HSDHs+CGSI                   | 0.2946         | 0.4086           |
| Free Thr/Asp        | AKs+AK-HSDHs+DHDPSs                 | 0.3614         | 0.3048           |
| Free Thr/Asp        | AKs+AK-HSDHs+TSI                    | 0.3366         | 0.3415           |
| Free Thr/Asp        | AKs+AK-HSDHs+TSI+TDI                | 0.3162         | 0.3735           |
| Free Thr/Asp        | AKs+AK-HSDHs+TSI+THAs               | 0.3430         | 0.3319           |
| <b>Free Thr/Asp</b> | <b>AKs+DHDPSs</b>                   | <b>0.4528</b>  | <b>0.1888</b>    |
| Free Thr/Asp        | BCATI                               | 0.3651         | 0.2996           |
| Free Thr/Asp        | Biosynthetic genes analyzed         | 0.2614         | 0.4657           |
| Free Thr/Asp        | Catabolic genes analyzed            | -0.2572        | 0.4731           |
| Free Thr/Asp        | CGSI                                | -0.2335        | 0.5163           |
| Free Thr/Asp        | CGSI/SAMSs                          | 0.1086         | 0.7653           |
| Free Thr/Asp        | CGSI/TSI                            | -0.3197        | 0.3679           |
| Free Thr/Asp        | DHDPS1                              | 0.2329         | 0.5173           |
| Free Thr/Asp        | DHDPS2                              | -0.3236        | 0.3617           |
| Free Thr/Asp        | DHDPSs                              | -0.0755        | 0.8357           |
| Free Thr/Asp        | DHDPSs/AK-HSDHs                     | 0.3944         | 0.2594           |
| <b>Free Thr/Asp</b> | <b>DHDPSs/LKR-SDHI</b>              | <b>-0.4121</b> | <b>0.2366</b>    |
| <b>Free Thr/Asp</b> | <b>Free (Lys+Met+Thr+Ile)/Asp</b>   | <b>0.9992</b>  | <b>&lt;.0001</b> |
| <b>Free Thr/Asp</b> | <b>Free Ala</b>                     | <b>-0.4388</b> | <b>0.2046</b>    |
| Free Thr/Asp        | Free Arg                            | -0.3115        | 0.3810           |
| Free Thr/Asp        | Free Asn                            | -0.3105        | 0.3825           |
| <b>Free Thr/Asp</b> | <b>Free Asn+Asp</b>                 | <b>-0.4187</b> | <b>0.2285</b>    |
| <b>Free Thr/Asp</b> | <b>Free Asn+Asp+Lys+Met+Thr+Ile</b> | <b>0.6277</b>  | <b>0.0520</b>    |
| <b>Free Thr/Asp</b> | <b>Free Asn+Asp+Lys+Thr+Ile</b>     | <b>0.6328</b>  | <b>0.0496</b>    |
| <b>Free Thr/Asp</b> | <b>Free Asp</b>                     | <b>-0.4252</b> | <b>0.2206</b>    |
| <b>Free Thr/Asp</b> | <b>Free Asp+Lys+Met+Thr+Ile</b>     | <b>0.6685</b>  | <b>0.0346</b>    |
| <b>Free Thr/Asp</b> | <b>Free Cys</b>                     | <b>0.7004</b>  | <b>0.0241</b>    |
| Free Thr/Asp        | Free Gln                            | -0.3465        | 0.3267           |
| Free Thr/Asp        | Free Glu                            | -0.1848        | 0.6092           |
| Free Thr/Asp        | Free Gly                            | -0.3006        | 0.3986           |
| <b>Free Thr/Asp</b> | <b>Free Gly/Thr</b>                 | <b>-0.7795</b> | <b>0.0079</b>    |
| Free Thr/Asp        | Free Gly+Ile                        | -0.2761        | 0.4401           |
| Free Thr/Asp        | Free His                            | -0.2844        | 0.4257           |
| Free Thr/Asp        | Free Ile                            | 0.3396         | 0.3370           |
| <b>Free Thr/Asp</b> | <b>Free Ile/Thr</b>                 | <b>-0.8307</b> | <b>0.0029</b>    |
| Free Thr/Asp        | Free Leu                            | -0.3825        | 0.2753           |
| Free Thr/Asp        | Free Lys                            | -0.3121        | 0.3800           |
| <b>Free Thr/Asp</b> | <b>Free Lys/(Met+Thr+Ile)</b>       | <b>-0.8931</b> | <b>0.0005</b>    |
| Free Thr/Asp        | Free Lys/Asp                        | 0.3125         | 0.3793           |
| <b>Free Thr/Asp</b> | <b>Free Lys/Thr</b>                 | <b>-0.8555</b> | <b>0.0016</b>    |
| <b>Free Thr/Asp</b> | <b>Free Lys+Met+Thr+Ile</b>         | <b>0.8895</b>  | <b>0.0006</b>    |
| Free Thr/Asp        | Free Met                            | -0.3352        | 0.3438           |
| <b>Free Thr/Asp</b> | <b>Free Met/Thr</b>                 | <b>-0.7955</b> | <b>0.0059</b>    |
| <b>Free Thr/Asp</b> | <b>Free Met+Thr+Ile</b>             | <b>0.8997</b>  | <b>0.0004</b>    |
| <b>Free Thr/Asp</b> | <b>Free Phe</b>                     | <b>-0.4884</b> | <b>0.1521</b>    |
| <b>Free Thr/Asp</b> | <b>Free Pro</b>                     | <b>-0.4279</b> | <b>0.2173</b>    |
| <b>Free Thr/Asp</b> | <b>Free Ser</b>                     | <b>-0.6212</b> | <b>0.0553</b>    |
| <b>Free Thr/Asp</b> | <b>Free Thr</b>                     | <b>0.9031</b>  | <b>0.0003</b>    |
| <b>Free Thr/Asp</b> | <b>Free Trp</b>                     | <b>-0.4738</b> | <b>0.1666</b>    |
| <b>Free Thr/Asp</b> | <b>Free Tyr</b>                     | <b>-0.4170</b> | <b>0.2306</b>    |



|                     |                                                            |                |               |
|---------------------|------------------------------------------------------------|----------------|---------------|
| <b>Free Thr/Asp</b> | <b>Free Val</b>                                            | <b>-0.4232</b> | <b>0.2229</b> |
| Free Thr/Asp        | HSDH activity with four effectors                          | -0.3240        | 0.3610        |
| Free Thr/Asp        | HSDH activity without effectors                            | -0.0499        | 0.8910        |
| <b>Free Thr/Asp</b> | <b>LKR-SDHI</b>                                            | <b>0.4121</b>  | <b>0.2366</b> |
| <b>Free Thr/Asp</b> | <b>Lys-sensitive AK activity</b>                           | <b>0.7047</b>  | <b>0.0229</b> |
| <b>Free Thr/Asp</b> | <b>Lys-sensitive AK activity/Thr-sensitive AK activity</b> | <b>0.5421</b>  | <b>0.1055</b> |
| <b>Free Thr/Asp</b> | <b>SAMS1</b>                                               | <b>-0.4591</b> | <b>0.1819</b> |
| Free Thr/Asp        | SAMS2                                                      | 0.0847         | 0.8161        |
| Free Thr/Asp        | SAMS3                                                      | -0.0752        | 0.8364        |
| Free Thr/Asp        | SAMS4                                                      | -0.2720        | 0.4471        |
| Free Thr/Asp        | SAMSs                                                      | -0.2619        | 0.4648        |
| Free Thr/Asp        | TD1                                                        | -0.1798        | 0.6191        |
| Free Thr/Asp        | TD1/BCAT1                                                  | -0.2352        | 0.5130        |
| Free Thr/Asp        | THA1                                                       | 0.0634         | 0.8618        |
| <b>Free Thr/Asp</b> | <b>THA2</b>                                                | <b>0.5023</b>  | <b>0.1390</b> |
| <b>Free Thr/Asp</b> | <b>THAs</b>                                                | <b>0.5469</b>  | <b>0.1018</b> |
| Free Thr/Asp        | THAs+TD1                                                   | -0.0648        | 0.8588        |
| <b>Free Thr/Asp</b> | <b>Thr-sensitive AK activity</b>                           | <b>-0.4011</b> | <b>0.2507</b> |
| Free Thr/Asp        | Total free AAs                                             | -0.1563        | 0.6664        |
| Free Thr/Asp        | TS1                                                        | 0.1024         | 0.7784        |
| Free Thr/Asp        | TS1/(THAs+TD1)                                             | 0.0948         | 0.7944        |
| Free Thr/Asp        | TS1/TD1                                                    | -0.0074        | 0.9838        |
| Free Thr/Asp        | TS1/THAs                                                   | -0.3147        | 0.3757        |
| Free Trp            | (AK-HSDHs+CGS1)/SAMSs                                      | -0.2546        | 0.4778        |
| Free Trp            | (AK-HSDHs+TS1)/(THAs+TD1)                                  | -0.2923        | 0.4125        |
| <b>Free Trp</b>     | <b>(AK-HSDHs+TS1+TD1)/BCAT1</b>                            | <b>0.5889</b>  | <b>0.0733</b> |
| <b>Free Trp</b>     | <b>(AKs+AK-HSDHs)/AK-HSDHs</b>                             | <b>-0.6419</b> | <b>0.0454</b> |
| <b>Free Trp</b>     | <b>(AKs+AK-HSDHs+CGS1)/SAMSs</b>                           | <b>-0.5654</b> | <b>0.0885</b> |
| Free Trp            | (AKs+AK-HSDHs+DHDPSs)/LKR-SDHI                             | 0.1565         | 0.6658        |
| <b>Free Trp</b>     | <b>(AKs+AK-HSDHs+TS1)/(THAs+TD1)</b>                       | <b>-0.5904</b> | <b>0.0723</b> |
| <b>Free Trp</b>     | <b>(AKs+AK-HSDHs+TS1+TD1)/BCAT1</b>                        | <b>0.5666</b>  | <b>0.0877</b> |
| Free Trp            | (AKs+DHDPSs)/LKR-SDHI                                      | -0.0057        | 0.9876        |
| Free Trp            | AK activity with four effectors                            | -0.0544        | 0.8813        |
| Free Trp            | AK activity without effectors                              | -0.1662        | 0.6463        |
| <b>Free Trp</b>     | <b>AK activity/HSDH activity with four effectors</b>       | <b>-0.4214</b> | <b>0.2252</b> |
| <b>Free Trp</b>     | <b>AK activity/HSDH activity without effectors</b>         | <b>-0.4302</b> | <b>0.2146</b> |
| Free Trp            | AK1                                                        | -0.0544        | 0.8813        |
| Free Trp            | AK1+AK2                                                    | -0.3521        | 0.3183        |
| Free Trp            | AK1+AK3                                                    | -0.0576        | 0.8745        |
| Free Trp            | AK2                                                        | -0.3274        | 0.3558        |
| Free Trp            | AK2+AK3                                                    | -0.3204        | 0.3668        |
| Free Trp            | AK3                                                        | -0.0069        | 0.9848        |
| Free Trp            | AK-HSDH1                                                   | 0.3964         | 0.2567        |
| <b>Free Trp</b>     | <b>AK-HSDH2</b>                                            | <b>0.7273</b>  | <b>0.0171</b> |
| <b>Free Trp</b>     | <b>AK-HSDHs</b>                                            | <b>0.6992</b>  | <b>0.0244</b> |
| <b>Free Trp</b>     | <b>AK-HSDHs+CGS1</b>                                       | <b>0.7713</b>  | <b>0.0090</b> |
| <b>Free Trp</b>     | <b>AK-HSDHs+TS1</b>                                        | <b>0.6990</b>  | <b>0.0245</b> |
| <b>Free Trp</b>     | <b>AK-HSDHs+TS1+TD1</b>                                    | <b>0.7281</b>  | <b>0.0170</b> |
| <b>Free Trp</b>     | <b>AK-HSDHs+TS1+THAs</b>                                   | <b>0.6940</b>  | <b>0.0260</b> |
| Free Trp            | AKs                                                        | -0.3478        | 0.3247        |
| <b>Free Trp</b>     | <b>AKs/AK-HSDHs</b>                                        | <b>-0.6419</b> | <b>0.0454</b> |
| Free Trp            | AKs+AK-HSDHs                                               | -0.1761        | 0.6265        |
| Free Trp            | AKs+AK-HSDHs+CGS1                                          | -0.0076        | 0.9834        |
| Free Trp            | AKs+AK-HSDHs+DHDPSs                                        | -0.1442        | 0.6911        |
| Free Trp            | AKs+AK-HSDHs+TS1                                           | 0.1472         | 0.6848        |
| Free Trp            | AKs+AK-HSDHs+TS1+TD1                                       | 0.1940         | 0.5912        |
| Free Trp            | AKs+AK-HSDHs+TS1+THAs                                      | 0.1427         | 0.6940        |

|                 |                                                            |                |                  |
|-----------------|------------------------------------------------------------|----------------|------------------|
| Free Trp        | <i>AKs+DHDPSs</i>                                          | -0.3146        | 0.3760           |
| <b>Free Trp</b> | <b><i>BCAT1</i></b>                                        | <b>-0.6595</b> | <b>0.0380</b>    |
| Free Trp        | Biosynthetic genes analyzed                                | 0.2747         | 0.4425           |
| <b>Free Trp</b> | <b>Catabolic genes analyzed</b>                            | <b>0.8027</b>  | <b>0.0052</b>    |
| <b>Free Trp</b> | <b><i>CGS1</i></b>                                         | <b>0.6986</b>  | <b>0.0246</b>    |
| <b>Free Trp</b> | <b><i>CGS1/SAMSs</i></b>                                   | <b>-0.4794</b> | <b>0.1609</b>    |
| Free Trp        | <i>CGS1/TS1</i>                                            | -0.1728        | 0.6331           |
| Free Trp        | <i>DHDPS1</i>                                              | 0.3588         | 0.3085           |
| <b>Free Trp</b> | <b><i>DHDPS2</i></b>                                       | <b>0.8272</b>  | <b>0.0031</b>    |
| <b>Free Trp</b> | <b><i>DHDPSs</i></b>                                       | <b>0.7829</b>  | <b>0.0074</b>    |
| <b>Free Trp</b> | <b><i>DHDPSs/AK-HSDHs</i></b>                              | <b>-0.5705</b> | <b>0.0851</b>    |
| <b>Free Trp</b> | <b><i>DHDPSs/LKR-SDHI</i></b>                              | <b>0.7727</b>  | <b>0.0088</b>    |
| <b>Free Trp</b> | <b>Free Ala</b>                                            | <b>0.8205</b>  | <b>0.0036</b>    |
| <b>Free Trp</b> | <b>Free Arg</b>                                            | <b>0.7112</b>  | <b>0.0211</b>    |
| <b>Free Trp</b> | <b>Free Asn</b>                                            | <b>0.7661</b>  | <b>0.0098</b>    |
| <b>Free Trp</b> | <b>Free Asp</b>                                            | <b>0.6142</b>  | <b>0.0589</b>    |
| Free Trp        | Free Cys                                                   | -0.0341        | 0.9255           |
| <b>Free Trp</b> | <b>Free Gln</b>                                            | <b>0.7876</b>  | <b>0.0068</b>    |
| Free Trp        | Free Glu                                                   | 0.2760         | 0.4401           |
| <b>Free Trp</b> | <b>Free Gly</b>                                            | <b>0.7156</b>  | <b>0.0200</b>    |
| <b>Free Trp</b> | <b>Free His</b>                                            | <b>0.8154</b>  | <b>0.0040</b>    |
| <b>Free Trp</b> | <b>Free Ile</b>                                            | <b>0.4466</b>  | <b>0.1957</b>    |
| <b>Free Trp</b> | <b>Free Leu</b>                                            | <b>0.9056</b>  | <b>0.0003</b>    |
| <b>Free Trp</b> | <b>Free Lys</b>                                            | <b>0.7948</b>  | <b>0.0060</b>    |
| <b>Free Trp</b> | <b>Free Met</b>                                            | <b>0.6001</b>  | <b>0.0666</b>    |
| <b>Free Trp</b> | <b>Free Phe</b>                                            | <b>0.9406</b>  | <b>&lt;.0001</b> |
| <b>Free Trp</b> | <b>Free Pro</b>                                            | <b>0.6931</b>  | <b>0.0263</b>    |
| <b>Free Trp</b> | <b>Free Ser</b>                                            | <b>0.6991</b>  | <b>0.0245</b>    |
| Free Trp        | Free Thr                                                   | -0.3884        | 0.2673           |
| <b>Free Trp</b> | <b>HSDH activity with four effectors</b>                   | <b>0.6798</b>  | <b>0.0306</b>    |
| <b>Free Trp</b> | <b>HSDH activity without effectors</b>                     | <b>0.4784</b>  | <b>0.1619</b>    |
| <b>Free Trp</b> | <b><i>LKR-SDHI</i></b>                                     | <b>-0.4629</b> | <b>0.1779</b>    |
| <b>Free Trp</b> | <b>Lys-sensitive AK activity</b>                           | <b>-0.5850</b> | <b>0.0757</b>    |
| <b>Free Trp</b> | <b>Lys-sensitive AK activity/Thr-sensitive AK activity</b> | <b>-0.4320</b> | <b>0.2125</b>    |
| <b>Free Trp</b> | <b><i>SAMS1</i></b>                                        | <b>0.7568</b>  | <b>0.0113</b>    |
| <b>Free Trp</b> | <b><i>SAMS2</i></b>                                        | <b>0.5718</b>  | <b>0.0842</b>    |
| <b>Free Trp</b> | <b><i>SAMS3</i></b>                                        | <b>0.5248</b>  | <b>0.1193</b>    |
| <b>Free Trp</b> | <b><i>SAMS4</i></b>                                        | <b>0.8116</b>  | <b>0.0044</b>    |
| <b>Free Trp</b> | <b><i>SAMSs</i></b>                                        | <b>0.8028</b>  | <b>0.0052</b>    |
| <b>Free Trp</b> | <b><i>TD1</i></b>                                          | <b>0.8251</b>  | <b>0.0033</b>    |
| <b>Free Trp</b> | <b><i>TD1/BCAT1</i></b>                                    | <b>0.6418</b>  | <b>0.0455</b>    |
| <b>Free Trp</b> | <b><i>THA1</i></b>                                         | <b>-0.4286</b> | <b>0.2165</b>    |
| Free Trp        | <i>THA2</i>                                                | -0.0825        | 0.8208           |
| Free Trp        | <i>THAs</i>                                                | -0.1638        | 0.6512           |
| <b>Free Trp</b> | <b><i>THAs+TD1</i></b>                                     | <b>0.7706</b>  | <b>0.0091</b>    |
| Free Trp        | Thr-sensitive AK activity                                  | 0.3090         | 0.3850           |
| <b>Free Trp</b> | <b><i>TS1</i></b>                                          | <b>0.6054</b>  | <b>0.0636</b>    |
| <b>Free Trp</b> | <b><i>TS1/(THAs+TD1)</i></b>                               | <b>-0.4501</b> | <b>0.1919</b>    |
| <b>Free Trp</b> | <b><i>TS1/TD1</i></b>                                      | <b>-0.4911</b> | <b>0.1495</b>    |
| <b>Free Trp</b> | <b><i>TS1/THAs</i></b>                                     | <b>0.7678</b>  | <b>0.0095</b>    |
| Free Tyr        | <i>(AK-HSDHs+CGS1)/SAMSs</i>                               | 0.2519         | 0.4826           |
| Free Tyr        | <i>(AK-HSDHs+TS1)/(THAs+TD1)</i>                           | -0.3877        | 0.2684           |
| <b>Free Tyr</b> | <b><i>(AK-HSDHs+TS1+TD1)/BCAT1</i></b>                     | <b>0.6061</b>  | <b>0.0632</b>    |
| Free Tyr        | <i>(AKs+AK-HSDHs)/AK-HSDHs</i>                             | -0.3292        | 0.3529           |
| Free Tyr        | <i>(AKs+AK-HSDHs+CGS1)/SAMSs</i>                           | -0.2367        | 0.5102           |
| Free Tyr        | <i>(AKs+AK-HSDHs+DHDPSs)/LKR-SDHI</i>                      | 0.0584         | 0.8727           |
| <b>Free Tyr</b> | <b><i>(AKs+AK-HSDHs+TS1)/(THAs+TD1)</i></b>                | <b>-0.5597</b> | <b>0.0925</b>    |
| <b>Free Tyr</b> | <b><i>(AKs+AK-HSDHs+TS1+TD1)/BCAT1</i></b>                 | <b>0.5907</b>  | <b>0.0722</b>    |

|                 |                                                      |                |               |
|-----------------|------------------------------------------------------|----------------|---------------|
| Free Tyr        | (AKs+DHDPSs)/LKR-SDHI                                | -0.0334        | 0.9270        |
| Free Tyr        | AK activity with four effectors                      | -0.0031        | 0.9933        |
| Free Tyr        | AK activity without effectors                        | 0.0115         | 0.9749        |
| <b>Free Tyr</b> | <b>AK activity/HSDH activity with four effectors</b> | <b>-0.4109</b> | <b>0.2382</b> |
| Free Tyr        | AK activity/HSDH activity without effectors          | -0.3248        | 0.3598        |
| <b>Free Tyr</b> | <b>AK1</b>                                           | <b>-0.4979</b> | <b>0.1431</b> |
| Free Tyr        | AK1+AK2                                              | -0.2164        | 0.5482        |
| <b>Free Tyr</b> | <b>AK1+AK3</b>                                       | <b>-0.4299</b> | <b>0.2150</b> |
| Free Tyr        | AK2                                                  | -0.1044        | 0.7742        |
| Free Tyr        | AK2+AK3                                              | -0.0970        | 0.7897        |
| Free Tyr        | AK3                                                  | 0.0402         | 0.9122        |
| Free Tyr        | AK-HSDHI                                             | 0.2024         | 0.5749        |
| <b>Free Tyr</b> | <b>AK-HSDH2</b>                                      | <b>0.4549</b>  | <b>0.1865</b> |
| <b>Free Tyr</b> | <b>AK-HSDHs</b>                                      | <b>0.4135</b>  | <b>0.2349</b> |
| <b>Free Tyr</b> | <b>AK-HSDHs+CGSI</b>                                 | <b>0.6624</b>  | <b>0.0369</b> |
| <b>Free Tyr</b> | <b>AK-HSDHs+TSI</b>                                  | <b>0.5606</b>  | <b>0.0918</b> |
| <b>Free Tyr</b> | <b>AK-HSDHs+TSI+TDI</b>                              | <b>0.5849</b>  | <b>0.0757</b> |
| <b>Free Tyr</b> | <b>AK-HSDHs+TSI+THAs</b>                             | <b>0.5659</b>  | <b>0.0881</b> |
| Free Tyr        | AKs                                                  | -0.2066        | 0.5670        |
| Free Tyr        | AKs/AK-HSDHs                                         | -0.3292        | 0.3529        |
| Free Tyr        | AKs+AK-HSDHs                                         | -0.1050        | 0.7728        |
| Free Tyr        | AKs+AK-HSDHs+CGSI                                    | 0.0831         | 0.8194        |
| Free Tyr        | AKs+AK-HSDHs+DHDPSs                                  | -0.0846        | 0.8163        |
| Free Tyr        | AKs+AK-HSDHs+TSI                                     | 0.1775         | 0.6236        |
| Free Tyr        | AKs+AK-HSDHs+TSI+TDI                                 | 0.2131         | 0.5545        |
| Free Tyr        | AKs+AK-HSDHs+TSI+THAs                                | 0.1789         | 0.6210        |
| Free Tyr        | AKs+DHDPSs                                           | -0.1848        | 0.6094        |
| <b>Free Tyr</b> | <b>BCATI</b>                                         | <b>-0.6411</b> | <b>0.0458</b> |
| Free Tyr        | Biosynthetic genes analyzed                          | 0.3113         | 0.3813        |
| <b>Free Tyr</b> | <b>Catabolic genes analyzed</b>                      | <b>0.4459</b>  | <b>0.1965</b> |
| <b>Free Tyr</b> | <b>CGSI</b>                                          | <b>0.7982</b>  | <b>0.0056</b> |
| Free Tyr        | CGSI/SAMSs                                           | 0.0904         | 0.8039        |
| Free Tyr        | CGSI/TSI                                             | 0.0468         | 0.8979        |
| Free Tyr        | DHDPS1                                               | 0.2614         | 0.4657        |
| <b>Free Tyr</b> | <b>DHDPS2</b>                                        | <b>0.5568</b>  | <b>0.0945</b> |
| <b>Free Tyr</b> | <b>DHDPSs</b>                                        | <b>0.5171</b>  | <b>0.1259</b> |
| Free Tyr        | DHDPSs/AK-HSDHs                                      | -0.2994        | 0.4006        |
| <b>Free Tyr</b> | <b>DHDPSs/LKR-SDHI</b>                               | <b>0.4767</b>  | <b>0.1636</b> |
| <b>Free Tyr</b> | <b>Free Ala</b>                                      | <b>0.7387</b>  | <b>0.0147</b> |
| <b>Free Tyr</b> | <b>Free Arg</b>                                      | <b>0.6713</b>  | <b>0.0336</b> |
| <b>Free Tyr</b> | <b>Free Asn</b>                                      | <b>0.5878</b>  | <b>0.0739</b> |
| <b>Free Tyr</b> | <b>Free Asp</b>                                      | <b>0.4060</b>  | <b>0.2443</b> |
| Free Tyr        | Free Cys                                             | -0.1800        | 0.6188        |
| <b>Free Tyr</b> | <b>Free Gln</b>                                      | <b>0.5473</b>  | <b>0.1015</b> |
| Free Tyr        | Free Glu                                             | 0.1563         | 0.6663        |
| Free Tyr        | Free Gly                                             | 0.2898         | 0.4167        |
| <b>Free Tyr</b> | <b>Free His</b>                                      | <b>0.7345</b>  | <b>0.0155</b> |
| <b>Free Tyr</b> | <b>Free Ile</b>                                      | <b>0.6628</b>  | <b>0.0367</b> |
| <b>Free Tyr</b> | <b>Free Leu</b>                                      | <b>0.8462</b>  | <b>0.0020</b> |
| <b>Free Tyr</b> | <b>Free Lys</b>                                      | <b>0.8185</b>  | <b>0.0038</b> |
| <b>Free Tyr</b> | <b>Free Met</b>                                      | <b>0.6082</b>  | <b>0.0621</b> |
| <b>Free Tyr</b> | <b>Free Phe</b>                                      | <b>0.8853</b>  | <b>0.0007</b> |
| <b>Free Tyr</b> | <b>Free Pro</b>                                      | <b>0.4549</b>  | <b>0.1865</b> |
| Free Tyr        | Free Ser                                             | 0.3316         | 0.3492        |
| Free Tyr        | Free Thr                                             | -0.3266        | 0.3571        |
| <b>Free Tyr</b> | <b>Free Trp</b>                                      | <b>0.8103</b>  | <b>0.0045</b> |
| <b>Free Tyr</b> | <b>HSDH activity with four effectors</b>             | <b>0.6614</b>  | <b>0.0373</b> |
| <b>Free Tyr</b> | <b>HSDH activity without effectors</b>               | <b>0.4669</b>  | <b>0.1737</b> |

|                 |                                                     |                |               |
|-----------------|-----------------------------------------------------|----------------|---------------|
| Free Tyr        | <i>LKR-SDHI</i>                                     | -0.2716        | 0.4478        |
| <b>Free Tyr</b> | <b>Lys-sensitive AK activity</b>                    | <b>-0.4047</b> | <b>0.2460</b> |
| Free Tyr        | Lys-sensitive AK activity/Thr-sensitive AK activity | -0.0663        | 0.8556        |
| <b>Free Tyr</b> | <b><i>SAMS1</i></b>                                 | <b>0.6766</b>  | <b>0.0317</b> |
| <b>Free Tyr</b> | <b><i>SAMS2</i></b>                                 | <b>0.5486</b>  | <b>0.1006</b> |
| Free Tyr        | <i>SAMS3</i>                                        | 0.1324         | 0.7154        |
| <b>Free Tyr</b> | <b><i>SAMS4</i></b>                                 | <b>0.5489</b>  | <b>0.1004</b> |
| <b>Free Tyr</b> | <b><i>SAMSs</i></b>                                 | <b>0.4449</b>  | <b>0.1976</b> |
| <b>Free Tyr</b> | <b><i>TD1</i></b>                                   | <b>0.6646</b>  | <b>0.0360</b> |
| <b>Free Tyr</b> | <b><i>TD1/BCAT1</i></b>                             | <b>0.6356</b>  | <b>0.0483</b> |
| Free Tyr        | <i>THA1</i>                                         | -0.3073        | 0.3877        |
| Free Tyr        | <i>THA2</i>                                         | 0.3871         | 0.2690        |
| Free Tyr        | <i>THAs</i>                                         | 0.2984         | 0.4024        |
| <b>Free Tyr</b> | <b><i>THAs+TD1</i></b>                              | <b>0.7079</b>  | <b>0.0220</b> |
| Free Tyr        | Thr-sensitive AK activity                           | 0.1557         | 0.6675        |
| <b>Free Tyr</b> | <b><i>TS1</i></b>                                   | <b>0.5507</b>  | <b>0.0990</b> |
| <b>Free Tyr</b> | <b><i>TS1/(THAs+TD1)</i></b>                        | <b>-0.4708</b> | <b>0.1697</b> |
| <b>Free Tyr</b> | <b><i>TS1/TD1</i></b>                               | <b>-0.4893</b> | <b>0.1512</b> |
| Free Tyr        | <i>TS1/THAs</i>                                     | 0.3094         | 0.3843        |
| Free Val        | <i>(AK-HSDHs+CGS1)/SAMSs</i>                        | -0.0163        | 0.9644        |
| Free Val        | <i>(AK-HSDHs+TS1)/(THAs+TD1)</i>                    | -0.2082        | 0.5639        |
| Free Val        | <i>(AK-HSDHs+TS1+TD1)/BCAT1</i>                     | 0.3107         | 0.3823        |
| <b>Free Val</b> | <b><i>(AKs+AK-HSDHs)/AK-HSDHs</i></b>               | <b>-0.4185</b> | <b>0.2287</b> |
| Free Val        | <i>(AKs+AK-HSDHs+CGS1)/SAMSs</i>                    | -0.2835        | 0.4273        |
| Free Val        | <i>(AKs+AK-HSDHs+DHDPSs)/LKR-SDHI</i>               | 0.2801         | 0.4332        |
| Free Val        | <i>(AKs+AK-HSDHs+TS1)/(THAs+TD1)</i>                | -0.3987        | 0.2538        |
| Free Val        | <i>(AKs+AK-HSDHs+TS1+TD1)/BCAT1</i>                 | 0.2987         | 0.4019        |
| Free Val        | <i>(AKs+DHDPSs)/LKR-SDHI</i>                        | 0.1566         | 0.6657        |
| Free Val        | AK activity with four effectors                     | 0.0834         | 0.8187        |
| Free Val        | AK activity without effectors                       | 0.0351         | 0.9233        |
| Free Val        | AK activity/HSDH activity with four effectors       | -0.2338        | 0.5156        |
| Free Val        | AK activity/HSDH activity without effectors         | -0.1232        | 0.7346        |
| Free Val        | <i>AK1</i>                                          | -0.3880        | 0.2679        |
| Free Val        | <i>AK1+AK2</i>                                      | -0.1726        | 0.6334        |
| Free Val        | <i>AK1+AK3</i>                                      | 0.0120         | 0.9738        |
| Free Val        | <i>AK2</i>                                          | -0.0855        | 0.8142        |
| Free Val        | <i>AK2+AK3</i>                                      | -0.0028        | 0.9939        |
| <b>Free Val</b> | <b><i>AK3</i></b>                                   | <b>0.4676</b>  | <b>0.1730</b> |
| Free Val        | <i>AK-HSDH1</i>                                     | 0.3383         | 0.3391        |
| <b>Free Val</b> | <b><i>AK-HSDH2</i></b>                              | <b>0.7135</b>  | <b>0.0205</b> |
| <b>Free Val</b> | <b><i>AK-HSDHs</i></b>                              | <b>0.6554</b>  | <b>0.0397</b> |
| <b>Free Val</b> | <b><i>AK-HSDHs+CGS1</i></b>                         | <b>0.7552</b>  | <b>0.0116</b> |
| <b>Free Val</b> | <b><i>AK-HSDHs+TS1</i></b>                          | <b>0.8259</b>  | <b>0.0032</b> |
| <b>Free Val</b> | <b><i>AK-HSDHs+TS1+TD1</i></b>                      | <b>0.8484</b>  | <b>0.0019</b> |
| <b>Free Val</b> | <b><i>AK-HSDHs+TS1+THAs</i></b>                     | <b>0.8256</b>  | <b>0.0033</b> |
| Free Val        | <i>AKs</i>                                          | -0.0853        | 0.8147        |
| <b>Free Val</b> | <b><i>AKs/AK-HSDHs</i></b>                          | <b>-0.4185</b> | <b>0.2287</b> |
| Free Val        | <i>AKs+AK-HSDHs</i>                                 | 0.0840         | 0.8176        |
| Free Val        | <i>AKs+AK-HSDHs+CGS1</i>                            | 0.2431         | 0.4986        |
| Free Val        | <i>AKs+AK-HSDHs+DHDPSs</i>                          | 0.1110         | 0.7602        |
| <b>Free Val</b> | <b><i>AKs+AK-HSDHs+TS1</i></b>                      | <b>0.4391</b>  | <b>0.2042</b> |
| <b>Free Val</b> | <b><i>AKs+AK-HSDHs+TS1+TD1</i></b>                  | <b>0.4782</b>  | <b>0.1621</b> |
| <b>Free Val</b> | <b><i>AKs+AK-HSDHs+TS1+THAs</i></b>                 | <b>0.4359</b>  | <b>0.2080</b> |
| Free Val        | <i>AKs+DHDPSs</i>                                   | -0.0560        | 0.8779        |
| <b>Free Val</b> | <b><i>BCAT1</i></b>                                 | <b>-0.5577</b> | <b>0.0939</b> |
| <b>Free Val</b> | <b>Biosynthetic genes analyzed</b>                  | <b>0.5397</b>  | <b>0.1073</b> |
| <b>Free Val</b> | <b>Catabolic genes analyzed</b>                     | <b>0.6256</b>  | <b>0.0531</b> |

|                                          |                                                     |                |               |
|------------------------------------------|-----------------------------------------------------|----------------|---------------|
| <b>Free Val</b>                          | <b>CGS1</b>                                         | <b>0.7168</b>  | <b>0.0197</b> |
| Free Val                                 | CGS1/SAMSs                                          | -0.2757        | 0.4408        |
| Free Val                                 | CGS1/TS1                                            | -0.2967        | 0.4052        |
| Free Val                                 | DHDPS1                                              | 0.2822         | 0.4295        |
| <b>Free Val</b>                          | <b>DHDPS2</b>                                       | <b>0.8103</b>  | <b>0.0045</b> |
| <b>Free Val</b>                          | <b>DHDPSs</b>                                       | <b>0.7189</b>  | <b>0.0191</b> |
| <b>Free Val</b>                          | <b>DHDPSs/AK-HSDHs</b>                              | <b>-0.4452</b> | <b>0.1973</b> |
| <b>Free Val</b>                          | <b>DHDPSs/LKR-SDHI</b>                              | <b>0.6589</b>  | <b>0.0383</b> |
| <b>Free Val</b>                          | <b>Free Ala</b>                                     | <b>0.8329</b>  | <b>0.0028</b> |
| <b>Free Val</b>                          | <b>Free Arg</b>                                     | <b>0.6650</b>  | <b>0.0359</b> |
| <b>Free Val</b>                          | <b>Free Asn</b>                                     | <b>0.6956</b>  | <b>0.0255</b> |
| <b>Free Val</b>                          | <b>Free Asp</b>                                     | <b>0.4815</b>  | <b>0.1588</b> |
| Free Val                                 | Free Cys                                            | -0.1851        | 0.6087        |
| <b>Free Val</b>                          | <b>Free Gln</b>                                     | <b>0.6267</b>  | <b>0.0525</b> |
| Free Val                                 | Free Glu                                            | 0.3587         | 0.3087        |
| <b>Free Val</b>                          | <b>Free Gly</b>                                     | <b>0.4087</b>  | <b>0.2409</b> |
| <b>Free Val</b>                          | <b>Free His</b>                                     | <b>0.8109</b>  | <b>0.0044</b> |
| <b>Free Val</b>                          | <b>Free Ile</b>                                     | <b>0.4851</b>  | <b>0.1553</b> |
| <b>Free Val</b>                          | <b>Free Leu</b>                                     | <b>0.7893</b>  | <b>0.0066</b> |
| <b>Free Val</b>                          | <b>Free Lys</b>                                     | <b>0.6871</b>  | <b>0.0282</b> |
| <b>Free Val</b>                          | <b>Free Met</b>                                     | <b>0.4148</b>  | <b>0.2333</b> |
| <b>Free Val</b>                          | <b>Free Phe</b>                                     | <b>0.8940</b>  | <b>0.0005</b> |
| <b>Free Val</b>                          | <b>Free Pro</b>                                     | <b>0.5162</b>  | <b>0.1266</b> |
| <b>Free Val</b>                          | <b>Free Ser</b>                                     | <b>0.4290</b>  | <b>0.2160</b> |
| Free Val                                 | Free Thr                                            | -0.2665        | 0.4567        |
| <b>Free Val</b>                          | <b>Free Trp</b>                                     | <b>0.7758</b>  | <b>0.0083</b> |
| <b>Free Val</b>                          | <b>Free Tyr</b>                                     | <b>0.7587</b>  | <b>0.0110</b> |
| <b>Free Val</b>                          | <b>HSDH activity with four effectors</b>            | <b>0.5312</b>  | <b>0.1141</b> |
| Free Val                                 | HSDH activity without effectors                     | 0.2526         | 0.4814        |
| Free Val                                 | LKR-SDHI                                            | -0.3017        | 0.3969        |
| Free Val                                 | Lys-sensitive AK activity                           | -0.3723        | 0.2893        |
| Free Val                                 | Lys-sensitive AK activity/Thr-sensitive AK activity | -0.2517        | 0.4830        |
| <b>Free Val</b>                          | <b>SAMS1</b>                                        | <b>0.7020</b>  | <b>0.0236</b> |
| <b>Free Val</b>                          | <b>SAMS2</b>                                        | <b>0.6903</b>  | <b>0.0271</b> |
| Free Val                                 | SAMS3                                               | 0.3024         | 0.3958        |
| <b>Free Val</b>                          | <b>SAMS4</b>                                        | <b>0.7865</b>  | <b>0.0070</b> |
| <b>Free Val</b>                          | <b>SAMSs</b>                                        | <b>0.6229</b>  | <b>0.0544</b> |
| <b>Free Val</b>                          | <b>TD1</b>                                          | <b>0.8392</b>  | <b>0.0024</b> |
| Free Val                                 | TD1/BCAT1                                           | 0.3516         | 0.3191        |
| Free Val                                 | THA1                                                | -0.3621        | 0.3039        |
| Free Val                                 | THA2                                                | 0.1254         | 0.7299        |
| Free Val                                 | THAs                                                | 0.0843         | 0.8170        |
| <b>Free Val</b>                          | <b>THAs+TD1</b>                                     | <b>0.8296</b>  | <b>0.0030</b> |
| <b>Free Val</b>                          | <b>Thr-sensitive AK activity</b>                    | <b>0.4867</b>  | <b>0.1537</b> |
| <b>Free Val</b>                          | <b>TS1</b>                                          | <b>0.7913</b>  | <b>0.0064</b> |
| Free Val                                 | TS1/(THAs+TD1)                                      | -0.3509        | 0.3202        |
| Free Val                                 | TS1/TD1                                             | -0.3772        | 0.2826        |
| <b>Free Val</b>                          | <b>TS1/THAs</b>                                     | <b>0.5504</b>  | <b>0.0993</b> |
| HSDH activity with four effectors        | (AK-HSDHs+CGS1)/SAMSs                               | 0.2642         | 0.4607        |
| HSDH activity with four effectors        | (AK-HSDHs+TS1)/(THAs+TD1)                           | 0.3086         | 0.3857        |
| <b>HSDH activity with four effectors</b> | <b>(AK-HSDHs+TS1+TD1)/BCAT1</b>                     | <b>0.6336</b>  | <b>0.0492</b> |
| <b>HSDH activity with four effectors</b> | <b>(AKs+AK-HSDHs)/AK-HSDHs</b>                      | <b>-0.6242</b> | <b>0.0537</b> |
| HSDH activity with four effectors        | (AKs+AK-HSDHs+CGS1)/SAMSs                           | -0.3205        | 0.3667        |
| <b>HSDH activity with four effectors</b> | <b>(AKs+AK-HSDHs+DHDPSs)/LKR-SDHI</b>               | <b>0.4993</b>  | <b>0.1417</b> |
| HSDH activity with four effectors        | (AKs+AK-HSDHs+TS1)/(THAs+TD1)                       | 0.0478         | 0.8957        |
| <b>HSDH activity with four effectors</b> | <b>(AKs+AK-HSDHs+TS1+TD1)/BCAT1</b>                 | <b>0.6102</b>  | <b>0.0610</b> |
| HSDH activity with four effectors        | (AKs+DHDPSs)/LKR-SDHI                               | 0.3428         | 0.3322        |
| HSDH activity with four effectors        | AK activity with four effectors                     | 0.3411         | 0.3348        |

|                                          |                                        |                |               |
|------------------------------------------|----------------------------------------|----------------|---------------|
| HSDH activity with four effectors        | AK activity without effectors          | 0.2889         | 0.4182        |
| HSDH activity with four effectors        | AK1                                    | 0.0330         | 0.9279        |
| HSDH activity with four effectors        | AK1+AK2                                | -0.1855        | 0.6079        |
| HSDH activity with four effectors        | AK1+AK3                                | -0.0889        | 0.8070        |
| HSDH activity with four effectors        | AK2                                    | -0.1853        | 0.6082        |
| HSDH activity with four effectors        | AK2+AK3                                | -0.2060        | 0.5679        |
| HSDH activity with four effectors        | AK3                                    | -0.1495        | 0.6802        |
| <b>HSDH activity with four effectors</b> | <b>AK-HSDH1</b>                        | <b>0.6694</b>  | <b>0.0343</b> |
| <b>HSDH activity with four effectors</b> | <b>AK-HSDH2</b>                        | <b>0.5993</b>  | <b>0.0671</b> |
| <b>HSDH activity with four effectors</b> | <b>AK-HSDHs</b>                        | <b>0.7708</b>  | <b>0.0091</b> |
| <b>HSDH activity with four effectors</b> | <b>AK-HSDHs+CGS1</b>                   | <b>0.8182</b>  | <b>0.0038</b> |
| <b>HSDH activity with four effectors</b> | <b>AK-HSDHs+TS1</b>                    | <b>0.6756</b>  | <b>0.0320</b> |
| <b>HSDH activity with four effectors</b> | <b>AK-HSDHs+TS1+TD1</b>                | <b>0.6601</b>  | <b>0.0378</b> |
| <b>HSDH activity with four effectors</b> | <b>AK-HSDHs+TS1+THAs</b>               | <b>0.6748</b>  | <b>0.0323</b> |
| HSDH activity with four effectors        | AKs                                    | -0.2098        | 0.5607        |
| <b>HSDH activity with four effectors</b> | <b>AKs/AK-HSDHs</b>                    | <b>-0.6242</b> | <b>0.0537</b> |
| HSDH activity with four effectors        | AKs+AK-HSDHs                           | -0.0145        | 0.9683        |
| HSDH activity with four effectors        | AKs+AK-HSDHs+CGS1                      | 0.1479         | 0.6835        |
| HSDH activity with four effectors        | AKs+AK-HSDHs+DHDPSs                    | 0.0002         | 0.9996        |
| HSDH activity with four effectors        | AKs+AK-HSDHs+TS1                       | 0.2455         | 0.4941        |
| HSDH activity with four effectors        | AKs+AK-HSDHs+TS1+TD1                   | 0.2588         | 0.4703        |
| HSDH activity with four effectors        | AKs+AK-HSDHs+TS1+THAs                  | 0.2431         | 0.4986        |
| HSDH activity with four effectors        | AKs+DHDPSs                             | -0.1933        | 0.5927        |
| HSDH activity with four effectors        | BCAT1                                  | -0.2190        | 0.5433        |
| HSDH activity with four effectors        | Biosynthetic genes analyzed            | 0.3533         | 0.3166        |
| <b>HSDH activity with four effectors</b> | <b>Catabolic genes analyzed</b>        | <b>0.5488</b>  | <b>0.1004</b> |
| <b>HSDH activity with four effectors</b> | <b>CGS1</b>                            | <b>0.7061</b>  | <b>0.0225</b> |
| HSDH activity with four effectors        | CGS1/SAMSs                             | -0.1946        | 0.5900        |
| HSDH activity with four effectors        | CGS1/TS1                               | -0.1407        | 0.6982        |
| HSDH activity with four effectors        | DHDPS1                                 | 0.0906         | 0.8033        |
| <b>HSDH activity with four effectors</b> | <b>DHDPS2</b>                          | <b>0.4913</b>  | <b>0.1493</b> |
| HSDH activity with four effectors        | DHDPSs                                 | 0.3775         | 0.2821        |
| <b>HSDH activity with four effectors</b> | <b>DHDPSs/AK-HSDHs</b>                 | <b>-0.7110</b> | <b>0.0212</b> |
| <b>HSDH activity with four effectors</b> | <b>DHDPSs/LKR-SDHI</b>                 | <b>0.7180</b>  | <b>0.0194</b> |
| <b>HSDH activity with four effectors</b> | <b>HSDH activity without effectors</b> | <b>0.8670</b>  | <b>0.0012</b> |
| <b>HSDH activity with four effectors</b> | <b>LKR-SDHI</b>                        | <b>-0.5710</b> | <b>0.0847</b> |
| HSDH activity with four effectors        | SAMS1                                  | 0.1347         | 0.7106        |
| HSDH activity with four effectors        | SAMS2                                  | 0.1965         | 0.5864        |
| <b>HSDH activity with four effectors</b> | <b>SAMS3</b>                           | <b>0.5546</b>  | <b>0.0961</b> |
| <b>HSDH activity with four effectors</b> | <b>SAMS4</b>                           | <b>0.5460</b>  | <b>0.1025</b> |
| <b>HSDH activity with four effectors</b> | <b>SAMSs</b>                           | <b>0.5497</b>  | <b>0.0997</b> |
| HSDH activity with four effectors        | TD1                                    | 0.3397         | 0.3369        |
| <b>HSDH activity with four effectors</b> | <b>TD1/BCAT1</b>                       | <b>0.6414</b>  | <b>0.0456</b> |
| <b>HSDH activity with four effectors</b> | <b>THA1</b>                            | <b>-0.4379</b> | <b>0.2056</b> |
| HSDH activity with four effectors        | THA2                                   | 0.1269         | 0.7269        |
| HSDH activity with four effectors        | THAs                                   | 0.0077         | 0.9831        |
| HSDH activity with four effectors        | THAs+TD1                               | 0.3418         | 0.3337        |
| <b>HSDH activity with four effectors</b> | <b>TS1</b>                             | <b>0.5445</b>  | <b>0.1037</b> |
| HSDH activity with four effectors        | TS1/(THAs+TD1)                         | 0.1276         | 0.7253        |
| HSDH activity with four effectors        | TS1/TD1                                | 0.1605         | 0.6578        |
| <b>HSDH activity with four effectors</b> | <b>TS1/THAs</b>                        | <b>0.4901</b>  | <b>0.1504</b> |
| HSDH activity without effectors          | (AK-HSDHs+CGS1)/SAMSs                  | 0.1789         | 0.6209        |
| <b>HSDH activity without effectors</b>   | <b>(AK-HSDHs+TS1)/(THAs+TD1)</b>       | <b>0.4286</b>  | <b>0.2165</b> |
| <b>HSDH activity without effectors</b>   | <b>(AK-HSDHs+TS1+TD1)/BCAT1</b>        | <b>0.4777</b>  | <b>0.1626</b> |
| <b>HSDH activity without effectors</b>   | <b>(AKs+AK-HSDHs)/AK-HSDHs</b>         | <b>-0.6654</b> | <b>0.0358</b> |
| <b>HSDH activity without effectors</b>   | <b>(AKs+AK-HSDHs+CGS1)/SAMSs</b>       | <b>-0.4408</b> | <b>0.2022</b> |
| HSDH activity without effectors          | (AKs+AK-HSDHs+DHDPSs)/LKR-SDHI         | 0.2466         | 0.4922        |

|                                        |                                                    |                |               |
|----------------------------------------|----------------------------------------------------|----------------|---------------|
| HSDH activity without effectors        | $(AK_s+AK-HSDH_s+TS1)/(THA_s+TD1)$                 | 0.0609         | 0.8673        |
| <b>HSDH activity without effectors</b> | <b><math>(AK_s+AK-HSDH_s+TS1+TD1)/BCAT1</math></b> | <b>0.4439</b>  | <b>0.1988</b> |
| HSDH activity without effectors        | $(AK_s+DHDPS_s)/LKR-SDHI$                          | 0.0831         | 0.8194        |
| HSDH activity without effectors        | AK activity without effectors                      | 0.3383         | 0.3390        |
| HSDH activity without effectors        | AK1                                                | 0.0894         | 0.8060        |
| HSDH activity without effectors        | AK1+AK2                                            | -0.3549        | 0.3143        |
| HSDH activity without effectors        | AK1+AK3                                            | -0.2400        | 0.5042        |
| HSDH activity without effectors        | AK2                                                | -0.3609        | 0.3055        |
| <b>HSDH activity without effectors</b> | <b>AK2+AK3</b>                                     | <b>-0.4216</b> | <b>0.2249</b> |
| <b>HSDH activity without effectors</b> | <b>AK3</b>                                         | <b>-0.4073</b> | <b>0.2427</b> |
| <b>HSDH activity without effectors</b> | <b>AK-HSDH1</b>                                    | <b>0.7999</b>  | <b>0.0055</b> |
| HSDH activity without effectors        | AK-HSDH2                                           | 0.2084         | 0.5635        |
| <b>HSDH activity without effectors</b> | <b>AK-HSDHs</b>                                    | <b>0.5897</b>  | <b>0.0728</b> |
| <b>HSDH activity without effectors</b> | <b>AK-HSDHs+CGS1</b>                               | <b>0.6071</b>  | <b>0.0627</b> |
| <b>HSDH activity without effectors</b> | <b>AK-HSDHs+TS1</b>                                | <b>0.5640</b>  | <b>0.0894</b> |
| <b>HSDH activity without effectors</b> | <b>AK-HSDHs+TS1+TD1</b>                            | <b>0.5337</b>  | <b>0.1121</b> |
| <b>HSDH activity without effectors</b> | <b>AK-HSDHs+TS1+THAs</b>                           | <b>0.5650</b>  | <b>0.0888</b> |
| <b>HSDH activity without effectors</b> | <b>AKs</b>                                         | <b>-0.4232</b> | <b>0.2230</b> |
| <b>HSDH activity without effectors</b> | <b>AKs/AK-HSDHs</b>                                | <b>-0.6654</b> | <b>0.0358</b> |
| HSDH activity without effectors        | AKs+AK-HSDHs                                       | -0.2839        | 0.4267        |
| HSDH activity without effectors        | AKs+AK-HSDHs+CGS1                                  | -0.1528        | 0.6735        |
| HSDH activity without effectors        | AKs+AK-HSDHs+DHDPSs                                | -0.2744        | 0.4430        |
| HSDH activity without effectors        | AKs+AK-HSDHs+TS1                                   | 0.0035         | 0.9925        |
| HSDH activity without effectors        | AKs+AK-HSDHs+TS1+TD1                               | 0.0086         | 0.9813        |
| HSDH activity without effectors        | AKs+AK-HSDHs+TS1+THAs                              | 0.0031         | 0.9933        |
| <b>HSDH activity without effectors</b> | <b>AKs+DHDPSs</b>                                  | <b>-0.4139</b> | <b>0.2344</b> |
| HSDH activity without effectors        | BCAT1                                              | 0.1060         | 0.7707        |
| HSDH activity without effectors        | Biosynthetic genes analyzed                        | 0.0941         | 0.7960        |
| <b>HSDH activity without effectors</b> | <b>Catabolic genes analyzed</b>                    | <b>0.4020</b>  | <b>0.2495</b> |
| <b>HSDH activity without effectors</b> | <b>CGS1</b>                                        | <b>0.5011</b>  | <b>0.1401</b> |
| HSDH activity without effectors        | CGS1/SAMSs                                         | -0.1727        | 0.6333        |
| HSDH activity without effectors        | CGS1/TS1                                           | -0.3138        | 0.3772        |
| HSDH activity without effectors        | DHDPS1                                             | 0.0948         | 0.7944        |
| HSDH activity without effectors        | DHDPS2                                             | 0.2127         | 0.5553        |
| HSDH activity without effectors        | DHDPSs                                             | 0.1857         | 0.6075        |
| <b>HSDH activity without effectors</b> | <b>DHDPSs/AK-HSDHs</b>                             | <b>-0.6010</b> | <b>0.0661</b> |
| <b>HSDH activity without effectors</b> | <b>DHDPSs/LKR-SDHI</b>                             | <b>0.5311</b>  | <b>0.1142</b> |
| <b>HSDH activity without effectors</b> | <b>LKR-SDHI</b>                                    | <b>-0.4338</b> | <b>0.2103</b> |
| HSDH activity without effectors        | SAMS1                                              | -0.1021        | 0.7789        |
| HSDH activity without effectors        | SAMS2                                              | 0.0605         | 0.8682        |
| <b>HSDH activity without effectors</b> | <b>SAMS3</b>                                       | <b>0.5124</b>  | <b>0.1299</b> |
| HSDH activity without effectors        | SAMS4                                              | 0.3744         | 0.2864        |
| <b>HSDH activity without effectors</b> | <b>SAMSs</b>                                       | <b>0.4021</b>  | <b>0.2494</b> |
| HSDH activity without effectors        | TD1                                                | 0.0960         | 0.7919        |
| <b>HSDH activity without effectors</b> | <b>TD1/BCAT1</b>                                   | <b>0.4691</b>  | <b>0.1714</b> |
| HSDH activity without effectors        | THA1                                               | -0.2325        | 0.5180        |
| HSDH activity without effectors        | THA2                                               | 0.1389         | 0.7020        |
| HSDH activity without effectors        | THAs                                               | 0.0184         | 0.9599        |
| HSDH activity without effectors        | THAs+TD1                                           | 0.1155         | 0.7506        |
| <b>HSDH activity without effectors</b> | <b>TS1</b>                                         | <b>0.4788</b>  | <b>0.1615</b> |
| HSDH activity without effectors        | TS1/(THAs+TD1)                                     | 0.3603         | 0.3064        |
| HSDH activity without effectors        | TS1/TD1                                            | 0.2897         | 0.4169        |
| HSDH activity without effectors        | TS1/THAs                                           | 0.3916         | 0.2631        |
| LKR-SDHI                               | AK1                                                | -0.1312        | 0.7178        |
| LKR-SDHI                               | AK2                                                | 0.2951         | 0.4078        |
| LKR-SDHI                               | AK3                                                | 0.1647         | 0.6494        |
| <b>LKR-SDHI</b>                        | <b>AK-HSDH1</b>                                    | <b>-0.5670</b> | <b>0.0874</b> |

|                                  |                                                      |                |               |
|----------------------------------|------------------------------------------------------|----------------|---------------|
| <i>LKR-SDHI</i>                  | <i>AK-HSDH2</i>                                      | <b>-0.6844</b> | <b>0.0290</b> |
| <i>LKR-SDHI</i>                  | <i>CGS1</i>                                          | <b>-0.6692</b> | <b>0.0343</b> |
| <i>LKR-SDHI</i>                  | <i>DHDPS1</i>                                        | <b>0.5814</b>  | <b>0.0779</b> |
| <i>LKR-SDHI</i>                  | <i>DHDPS2</i>                                        | <b>-0.5591</b> | <b>0.0929</b> |
| <i>LKR-SDHI</i>                  | <i>TD1</i>                                           | -0.1076        | 0.7673        |
| <i>LKR-SDHI</i>                  | <i>TS1</i>                                           | -0.1742        | 0.6304        |
| Lys-sensitive AK activity        | <i>(AK-HSDHs+CGS1)/SAMSs</i>                         | 0.3628         | 0.3029        |
| <b>Lys-sensitive AK activity</b> | <i>(AK-HSDHs+TS1)/(THAs+TD1)</i>                     | <b>0.4260</b>  | <b>0.2197</b> |
| Lys-sensitive AK activity        | <i>(AK-HSDHs+TS1+TD1)/BCAT1</i>                      | -0.0639        | 0.8609        |
| <b>Lys-sensitive AK activity</b> | <i>(AKs+AK-HSDHs)/AK-HSDHs</i>                       | <b>0.4259</b>  | <b>0.2197</b> |
| <b>Lys-sensitive AK activity</b> | <i>(AKs+AK-HSDHs+CGS1)/SAMSs</i>                     | <b>0.5868</b>  | <b>0.0745</b> |
| <b>Lys-sensitive AK activity</b> | <i>(AKs+AK-HSDHs+DHDPSs)/LKR-SDHI</i>                | <b>0.4484</b>  | <b>0.1937</b> |
| <b>Lys-sensitive AK activity</b> | <i>(AKs+AK-HSDHs+TS1)/(THAs+TD1)</i>                 | <b>0.7232</b>  | <b>0.0181</b> |
| Lys-sensitive AK activity        | <i>(AKs+AK-HSDHs+TS1+TD1)/BCAT1</i>                  | -0.0435        | 0.9050        |
| <b>Lys-sensitive AK activity</b> | <i>(AKs+DHDPSs)/LKR-SDHI</i>                         | <b>0.5912</b>  | <b>0.0718</b> |
| <b>Lys-sensitive AK activity</b> | <b>AK activity with four effectors</b>               | <b>0.7769</b>  | <b>0.0082</b> |
| <b>Lys-sensitive AK activity</b> | <b>AK activity without effectors</b>                 | <b>0.8360</b>  | <b>0.0026</b> |
| <b>Lys-sensitive AK activity</b> | <b>AK activity/HSDH activity with four effectors</b> | <b>0.7477</b>  | <b>0.0129</b> |
| <b>Lys-sensitive AK activity</b> | <b>AK activity/HSDH activity without effectors</b>   | <b>0.6205</b>  | <b>0.0556</b> |
| Lys-sensitive AK activity        | <i>AK1</i>                                           | -0.0829        | 0.8200        |
| <b>Lys-sensitive AK activity</b> | <i>AK1+AK2</i>                                       | <b>0.6960</b>  | <b>0.0254</b> |
| Lys-sensitive AK activity        | <i>AK1+AK3</i>                                       | -0.2384        | 0.5072        |
| <b>Lys-sensitive AK activity</b> | <i>AK2</i>                                           | <b>0.6877</b>  | <b>0.0280</b> |
| <b>Lys-sensitive AK activity</b> | <i>AK2+AK3</i>                                       | <b>0.6323</b>  | <b>0.0498</b> |
| Lys-sensitive AK activity        | <i>AK3</i>                                           | -0.2156        | 0.5496        |
| Lys-sensitive AK activity        | <i>AK-HSDH1</i>                                      | 0.0146         | 0.9681        |
| Lys-sensitive AK activity        | <i>AK-HSDH2</i>                                      | -0.3032        | 0.3944        |
| Lys-sensitive AK activity        | <i>AK-HSDHs</i>                                      | -0.1885        | 0.6021        |
| Lys-sensitive AK activity        | <i>AK-HSDHs+CGS1</i>                                 | -0.1078        | 0.7670        |
| Lys-sensitive AK activity        | <i>AK-HSDHs+TS1</i>                                  | -0.0190        | 0.9584        |
| Lys-sensitive AK activity        | <i>AK-HSDHs+TS1+TD1</i>                              | -0.0605        | 0.8682        |
| Lys-sensitive AK activity        | <i>AK-HSDHs+TS1+THAs</i>                             | -0.0091        | 0.9800        |
| <b>Lys-sensitive AK activity</b> | <i>AKs</i>                                           | <b>0.6449</b>  | <b>0.0441</b> |
| <b>Lys-sensitive AK activity</b> | <i>AKs/AK-HSDHs</i>                                  | <b>0.4259</b>  | <b>0.2197</b> |
| <b>Lys-sensitive AK activity</b> | <i>AKs+AK-HSDHs</i>                                  | <b>0.6192</b>  | <b>0.0563</b> |
| <b>Lys-sensitive AK activity</b> | <i>AKs+AK-HSDHs+CGS1</i>                             | <b>0.5867</b>  | <b>0.0746</b> |
| <b>Lys-sensitive AK activity</b> | <i>AKs+AK-HSDHs+DHDPSs</i>                           | <b>0.5999</b>  | <b>0.0667</b> |
| <b>Lys-sensitive AK activity</b> | <i>AKs+AK-HSDHs+TS1</i>                              | <b>0.5137</b>  | <b>0.1288</b> |
| <b>Lys-sensitive AK activity</b> | <i>AKs+AK-HSDHs+TS1+TD1</i>                          | <b>0.4702</b>  | <b>0.1702</b> |
| <b>Lys-sensitive AK activity</b> | <i>AKs+AK-HSDHs+TS1+THAs</i>                         | <b>0.5187</b>  | <b>0.1245</b> |
| <b>Lys-sensitive AK activity</b> | <i>AKs+DHDPSs</i>                                    | <b>0.6280</b>  | <b>0.0518</b> |
| <b>Lys-sensitive AK activity</b> | <i>BCAT1</i>                                         | <b>0.6128</b>  | <b>0.0596</b> |
| <b>Lys-sensitive AK activity</b> | <b>Biosynthetic genes analyzed</b>                   | <b>0.4544</b>  | <b>0.1871</b> |
| Lys-sensitive AK activity        | Catabolic genes analyzed                             | -0.3335        | 0.3464        |
| Lys-sensitive AK activity        | <i>CGS1</i>                                          | 0.0028         | 0.9938        |
| Lys-sensitive AK activity        | <i>CGS1/SAMSs</i>                                    | 0.3119         | 0.3803        |
| Lys-sensitive AK activity        | <i>CGS1/TS1</i>                                      | -0.0355        | 0.9225        |
| Lys-sensitive AK activity        | <i>DHDPS1</i>                                        | -0.2976        | 0.4037        |
| Lys-sensitive AK activity        | <i>DHDPS2</i>                                        | -0.2602        | 0.4678        |
| Lys-sensitive AK activity        | <i>DHDPSs</i>                                        | -0.3643        | 0.3007        |
| Lys-sensitive AK activity        | <i>DHDPSs/AK-HSDHs</i>                               | 0.0800         | 0.8261        |
| Lys-sensitive AK activity        | <i>DHDPSs/LKR-SDHI</i>                               | -0.2150        | 0.5508        |
| Lys-sensitive AK activity        | HSDH activity with four effectors                    | -0.0984        | 0.7867        |
| Lys-sensitive AK activity        | HSDH activity without effectors                      | 0.0149         | 0.9675        |
| Lys-sensitive AK activity        | <i>LKR-SDHI</i>                                      | 0.0295         | 0.9355        |
| <b>Lys-sensitive AK activity</b> | <i>SAMS1</i>                                         | <b>-0.7735</b> | <b>0.0087</b> |
| Lys-sensitive AK activity        | <i>SAMS2</i>                                         | -0.3295        | 0.3525        |



|                                                            |                                               |                |               |
|------------------------------------------------------------|-----------------------------------------------|----------------|---------------|
| Lys-sensitive AK activity                                  | <i>SAMS3</i>                                  | -0.0049        | 0.9893        |
| Lys-sensitive AK activity                                  | <i>SAMS4</i>                                  | -0.3010        | 0.3980        |
| Lys-sensitive AK activity                                  | <i>SAMSs</i>                                  | -0.3361        | 0.3423        |
| <b>Lys-sensitive AK activity</b>                           | <b><i>TD1</i></b>                             | <b>-0.4552</b> | <b>0.1862</b> |
| Lys-sensitive AK activity                                  | <i>TD1/BCAT1</i>                              | -0.1185        | 0.7443        |
| Lys-sensitive AK activity                                  | <i>THA1</i>                                   | -0.0952        | 0.7935        |
| <b>Lys-sensitive AK activity</b>                           | <b><i>THA2</i></b>                            | <b>0.4923</b>  | <b>0.1483</b> |
| <b>Lys-sensitive AK activity</b>                           | <b><i>THAs</i></b>                            | <b>0.5119</b>  | <b>0.1304</b> |
| Lys-sensitive AK activity                                  | <i>THAs+TD1</i>                               | -0.3420        | 0.3334        |
| Lys-sensitive AK activity                                  | <i>TS1</i>                                    | 0.0597         | 0.8699        |
| <b>Lys-sensitive AK activity</b>                           | <b><i>TS1/(THAs+TD1)</i></b>                  | <b>0.4940</b>  | <b>0.1468</b> |
| <b>Lys-sensitive AK activity</b>                           | <b><i>TS1/TD1</i></b>                         | <b>0.4673</b>  | <b>0.1732</b> |
| <b>Lys-sensitive AK activity</b>                           | <b><i>TS1/THAs</i></b>                        | <b>-0.5507</b> | <b>0.0990</b> |
| Lys-sensitive AK activity/Thr-sensitive AK activity        | <i>(AK-HSDHs+CGS1)/SAMSs</i>                  | 0.3500         | 0.3214        |
| Lys-sensitive AK activity/Thr-sensitive AK activity        | <i>(AK-HSDHs+TS1)/(THAs+TD1)</i>              | -0.1867        | 0.6055        |
| Lys-sensitive AK activity/Thr-sensitive AK activity        | <i>(AK-HSDHs+TS1+TD1)/BCAT1</i>               | -0.0753        | 0.8361        |
| <b>Lys-sensitive AK activity/Thr-sensitive AK activity</b> | <b><i>(AKs+AK-HSDHs)/AK-HSDHs</i></b>         | <b>0.6654</b>  | <b>0.0358</b> |
| <b>Lys-sensitive AK activity/Thr-sensitive AK activity</b> | <b><i>(AKs+AK-HSDHs+CGS1)/SAMSs</i></b>       | <b>0.5508</b>  | <b>0.0989</b> |
| Lys-sensitive AK activity/Thr-sensitive AK activity        | <i>(AKs+AK-HSDHs+DHDPSs)/LKR-SDHI</i>         | -0.1398        | 0.7001        |
| Lys-sensitive AK activity/Thr-sensitive AK activity        | <i>(AKs+AK-HSDHs+TS1)/(THAs+TD1)</i>          | 0.1003         | 0.7827        |
| Lys-sensitive AK activity/Thr-sensitive AK activity        | <i>(AKs+AK-HSDHs+TS1+TD1)/BCAT1</i>           | -0.0559        | 0.8781        |
| Lys-sensitive AK activity/Thr-sensitive AK activity        | <i>(AKs+DHDPSs)/LKR-SDHI</i>                  | -0.0007        | 0.9985        |
| Lys-sensitive AK activity/Thr-sensitive AK activity        | AK activity with four effectors               | 0.2987         | 0.4018        |
| Lys-sensitive AK activity/Thr-sensitive AK activity        | AK activity without effectors                 | 0.3917         | 0.2630        |
| Lys-sensitive AK activity/Thr-sensitive AK activity        | AK activity/HSDH activity with four effectors | 0.3317         | 0.3491        |
| Lys-sensitive AK activity/Thr-sensitive AK activity        | AK activity/HSDH activity without effectors   | 0.3602         | 0.3066        |
| Lys-sensitive AK activity/Thr-sensitive AK activity        | <i>AK1</i>                                    | -0.0781        | 0.8302        |
| <b>Lys-sensitive AK activity/Thr-sensitive AK activity</b> | <b><i>AK1+AK2</i></b>                         | <b>0.4341</b>  | <b>0.2100</b> |
| Lys-sensitive AK activity/Thr-sensitive AK activity        | <i>AK1+AK3</i>                                | -0.0173        | 0.9622        |
| <b>Lys-sensitive AK activity/Thr-sensitive AK activity</b> | <b><i>AK2</i></b>                             | <b>0.4346</b>  | <b>0.2094</b> |
| <b>Lys-sensitive AK activity/Thr-sensitive AK activity</b> | <b><i>AK2+AK3</i></b>                         | <b>0.4329</b>  | <b>0.2114</b> |
| Lys-sensitive AK activity/Thr-sensitive AK activity        | <i>AK3</i>                                    | 0.0642         | 0.8602        |
| Lys-sensitive AK activity/Thr-sensitive AK activity        | <i>AK-HSDH1</i>                               | -0.3950        | 0.2586        |
| <b>Lys-sensitive AK activity/Thr-sensitive AK activity</b> | <b><i>AK-HSDH2</i></b>                        | <b>-0.4434</b> | <b>0.1993</b> |
| <b>Lys-sensitive AK activity/Thr-sensitive AK activity</b> | <b><i>AK-HSDHs</i></b>                        | <b>-0.5107</b> | <b>0.1314</b> |
| Lys-sensitive AK activity/Thr-sensitive AK activity        | <i>AK-HSDHs+CGS1</i>                          | -0.3133        | 0.3781        |
| Lys-sensitive AK activity/Thr-sensitive AK activity        | <i>AK-HSDHs+TS1</i>                           | -0.2672        | 0.4555        |
| Lys-sensitive AK activity/Thr-sensitive AK activity        | <i>AK-HSDHs+TS1+TD1</i>                       | -0.2670        | 0.4558        |
| Lys-sensitive AK activity/Thr-sensitive AK activity        | <i>AK-HSDHs+TS1+THAs</i>                      | -0.2505        | 0.4852        |
| <b>Lys-sensitive AK activity/Thr-sensitive AK activity</b> | <b><i>AKs</i></b>                             | <b>0.4390</b>  | <b>0.2044</b> |
| <b>Lys-sensitive AK activity/Thr-sensitive AK activity</b> | <b><i>AKs/AK-HSDHs</i></b>                    | <b>0.6654</b>  | <b>0.0358</b> |
| Lys-sensitive AK activity/Thr-sensitive AK activity        | <i>AKs+AK-HSDHs</i>                           | 0.3215         | 0.3650        |
| Lys-sensitive AK activity/Thr-sensitive AK activity        | <i>AKs+AK-HSDHs+CGS1</i>                      | 0.2939         | 0.4097        |
| Lys-sensitive AK activity/Thr-sensitive AK activity        | <i>AKs+AK-HSDHs+DHDPSs</i>                    | 0.3070         | 0.3883        |
| Lys-sensitive AK activity/Thr-sensitive AK activity        | <i>AKs+AK-HSDHs+TS1</i>                       | 0.1934         | 0.5924        |
| Lys-sensitive AK activity/Thr-sensitive AK activity        | <i>AKs+AK-HSDHs+TS1+TD1</i>                   | 0.1736         | 0.6315        |
| Lys-sensitive AK activity/Thr-sensitive AK activity        | <i>AKs+AK-HSDHs+TS1+THAs</i>                  | 0.2031         | 0.5735        |
| <b>Lys-sensitive AK activity/Thr-sensitive AK activity</b> | <b><i>AKs+DHDPSs</i></b>                      | <b>0.4252</b>  | <b>0.2206</b> |
| Lys-sensitive AK activity/Thr-sensitive AK activity        | <i>BCAT1</i>                                  | 0.0050         | 0.9891        |
| Lys-sensitive AK activity/Thr-sensitive AK activity        | Biosynthetic genes analyzed                   | 0.1583         | 0.6623        |
| <b>Lys-sensitive AK activity/Thr-sensitive AK activity</b> | <b>Catabolic genes analyzed</b>               | <b>-0.4529</b> | <b>0.1888</b> |
| Lys-sensitive AK activity/Thr-sensitive AK activity        | <i>CGS1</i>                                   | -0.0446        | 0.9026        |
| <b>Lys-sensitive AK activity/Thr-sensitive AK activity</b> | <b><i>CGS1/SAMSs</i></b>                      | <b>0.5820</b>  | <b>0.0775</b> |
| Lys-sensitive AK activity/Thr-sensitive AK activity        | <i>CGS1/TS1</i>                               | 0.1761         | 0.6266        |
| Lys-sensitive AK activity/Thr-sensitive AK activity        | <i>DHDPS1</i>                                 | 0.0997         | 0.7841        |
| <b>Lys-sensitive AK activity/Thr-sensitive AK activity</b> | <b><i>DHDPS2</i></b>                          | <b>-0.4593</b> | <b>0.1818</b> |
| Lys-sensitive AK activity/Thr-sensitive AK activity        | <i>DHDPSs</i>                                 | -0.2640        | 0.4611        |

|                                                            |                                               |                |               |
|------------------------------------------------------------|-----------------------------------------------|----------------|---------------|
| <b>Lys-sensitive AK activity/Thr-sensitive AK activity</b> | <b>DHDPSs/AK-HSDHs</b>                        | <b>0.5788</b>  | <b>0.0795</b> |
| <b>Lys-sensitive AK activity/Thr-sensitive AK activity</b> | <b>DHDPSs/LKR-SDHI</b>                        | <b>-0.5343</b> | <b>0.1116</b> |
| Lys-sensitive AK activity/Thr-sensitive AK activity        | HSDH activity with four effectors             | -0.1339        | 0.7124        |
| Lys-sensitive AK activity/Thr-sensitive AK activity        | HSDH activity without effectors               | -0.0964        | 0.7910        |
| Lys-sensitive AK activity/Thr-sensitive AK activity        | <i>LKR-SDHI</i>                               | 0.3820         | 0.2760        |
| <b>Lys-sensitive AK activity/Thr-sensitive AK activity</b> | <b>Lys-sensitive AK activity</b>              | <b>0.4408</b>  | <b>0.2023</b> |
| Lys-sensitive AK activity/Thr-sensitive AK activity        | <i>SAMS1</i>                                  | -0.2717        | 0.4475        |
| Lys-sensitive AK activity/Thr-sensitive AK activity        | <i>SAMS2</i>                                  | 0.0728         | 0.8416        |
| Lys-sensitive AK activity/Thr-sensitive AK activity        | <i>SAMS3</i>                                  | -0.3927        | 0.2617        |
| <b>Lys-sensitive AK activity/Thr-sensitive AK activity</b> | <b><i>SAMS4</i></b>                           | <b>-0.4382</b> | <b>0.2053</b> |
| <b>Lys-sensitive AK activity/Thr-sensitive AK activity</b> | <b><i>SAMSs</i></b>                           | <b>-0.4549</b> | <b>0.1866</b> |
| Lys-sensitive AK activity/Thr-sensitive AK activity        | <i>TD1</i>                                    | -0.2312        | 0.5205        |
| Lys-sensitive AK activity/Thr-sensitive AK activity        | <i>TD1/BCAT1</i>                              | -0.0990        | 0.7856        |
| Lys-sensitive AK activity/Thr-sensitive AK activity        | <i>THA1</i>                                   | -0.1319        | 0.7165        |
| <b>Lys-sensitive AK activity/Thr-sensitive AK activity</b> | <b><i>THA2</i></b>                            | <b>0.7611</b>  | <b>0.0106</b> |
| <b>Lys-sensitive AK activity/Thr-sensitive AK activity</b> | <b><i>THAs</i></b>                            | <b>0.7842</b>  | <b>0.0072</b> |
| Lys-sensitive AK activity/Thr-sensitive AK activity        | <i>THAs+TD1</i>                               | -0.0705        | 0.8466        |
| <b>Lys-sensitive AK activity/Thr-sensitive AK activity</b> | <b>Thr-sensitive AK activity</b>              | <b>-0.7265</b> | <b>0.0173</b> |
| Lys-sensitive AK activity/Thr-sensitive AK activity        | <i>TS1</i>                                    | -0.1247        | 0.7315        |
| Lys-sensitive AK activity/Thr-sensitive AK activity        | <i>TS1/(THAs+TD1)</i>                         | -0.1045        | 0.7739        |
| Lys-sensitive AK activity/Thr-sensitive AK activity        | <i>TS1/TD1</i>                                | -0.0171        | 0.9625        |
| <b>Lys-sensitive AK activity/Thr-sensitive AK activity</b> | <b><i>TS1/THAs</i></b>                        | <b>-0.5884</b> | <b>0.0735</b> |
| Protein-bound Ala                                          | <i>(AK-HSDHs+CGS1)/SAMSs</i>                  | -0.3709        | 0.2913        |
| Protein-bound Ala                                          | <i>(AK-HSDHs+TS1)/(THAs+TD1)</i>              | 0.3252         | 0.3592        |
| <b>Protein-bound Ala</b>                                   | <b><i>(AK-HSDHs+TS1+TD1)/BCAT1</i></b>        | <b>-0.4899</b> | <b>0.1506</b> |
| Protein-bound Ala                                          | <i>(AKs+AK-HSDHs)/AK-HSDHs</i>                | -0.3349        | 0.3442        |
| Protein-bound Ala                                          | <i>(AKs+AK-HSDHs+CGS1)/SAMSs</i>              | -0.3192        | 0.3686        |
| Protein-bound Ala                                          | <i>(AKs+AK-HSDHs+DHDPSs)/LKR-SDHI</i>         | -0.0001        | 0.9997        |
| Protein-bound Ala                                          | <i>(AKs+AK-HSDHs+TS1)/(THAs+TD1)</i>          | 0.0949         | 0.7944        |
| <b>Protein-bound Ala</b>                                   | <b><i>(AKs+AK-HSDHs+TS1+TD1)/BCAT1</i></b>    | <b>-0.5112</b> | <b>0.1310</b> |
| Protein-bound Ala                                          | <i>(AKs+DHDPSs)/LKR-SDHI</i>                  | -0.0962        | 0.7916        |
| Protein-bound Ala                                          | AK activity with four effectors               | 0.0240         | 0.9475        |
| Protein-bound Ala                                          | AK activity without effectors                 | 0.2536         | 0.4795        |
| Protein-bound Ala                                          | AK activity/HSDH activity with four effectors | 0.0070         | 0.9847        |
| Protein-bound Ala                                          | AK activity/HSDH activity without effectors   | -0.1362        | 0.7076        |
| Protein-bound Ala                                          | <i>AK1</i>                                    | -0.1318        | 0.7166        |
| Protein-bound Ala                                          | <i>AK1+AK2</i>                                | -0.2718        | 0.4475        |
| Protein-bound Ala                                          | <i>AK1+AK3</i>                                | -0.0108        | 0.9765        |
| Protein-bound Ala                                          | <i>AK2</i>                                    | -0.2358        | 0.5120        |
| Protein-bound Ala                                          | <i>AK2+AK3</i>                                | -0.2053        | 0.5694        |
| Protein-bound Ala                                          | <i>AK3</i>                                    | 0.1311         | 0.7181        |
| <b>Protein-bound Ala</b>                                   | <b><i>AK-HSDHI</i></b>                        | <b>0.6149</b>  | <b>0.0585</b> |
| Protein-bound Ala                                          | <i>AK-HSDH2</i>                               | -0.1391        | 0.7015        |
| Protein-bound Ala                                          | <i>AK-HSDHs</i>                               | 0.2525         | 0.4815        |
| Protein-bound Ala                                          | <i>AK-HSDHs+CGS1</i>                          | 0.0836         | 0.8184        |
| Protein-bound Ala                                          | <i>AK-HSDHs+TS1</i>                           | 0.3793         | 0.2797        |
| Protein-bound Ala                                          | <i>AK-HSDHs+TS1+TD1</i>                       | 0.3593         | 0.3079        |
| Protein-bound Ala                                          | <i>AK-HSDHs+TS1+THAs</i>                      | 0.3753         | 0.2853        |
| Protein-bound Ala                                          | <i>AKs</i>                                    | -0.2437        | 0.4974        |
| Protein-bound Ala                                          | <i>AKs/AK-HSDHs</i>                           | -0.3349        | 0.3442        |
| Protein-bound Ala                                          | <i>AKs+AK-HSDHs</i>                           | -0.1868        | 0.6053        |
| Protein-bound Ala                                          | <i>AKs+AK-HSDHs+CGS1</i>                      | -0.2016        | 0.5765        |
| Protein-bound Ala                                          | <i>AKs+AK-HSDHs+DHDPSs</i>                    | -0.1816        | 0.6155        |
| Protein-bound Ala                                          | <i>AKs+AK-HSDHs+TS1</i>                       | 0.0353         | 0.9228        |
| Protein-bound Ala                                          | <i>AKs+AK-HSDHs+TS1+TD1</i>                   | 0.0388         | 0.9153        |
| Protein-bound Ala                                          | <i>AKs+AK-HSDHs+TS1+THAs</i>                  | 0.0327         | 0.9286        |
| Protein-bound Ala                                          | <i>AKs+DHDPSs</i>                             | -0.2399        | 0.5045        |

|                          |                                                     |                |               |
|--------------------------|-----------------------------------------------------|----------------|---------------|
| <b>Protein-bound Ala</b> | <b>BCAT1</b>                                        | <b>0.5054</b>  | <b>0.1361</b> |
| Protein-bound Ala        | Biosynthetic genes analyzed                         | 0.0153         | 0.9666        |
| Protein-bound Ala        | Catabolic genes analyzed                            | 0.2315         | 0.5198        |
| Protein-bound Ala        | <i>CGSI</i>                                         | -0.1127        | 0.7566        |
| <b>Protein-bound Ala</b> | <b><i>CGSI/SAMSs</i></b>                            | <b>-0.4414</b> | <b>0.2016</b> |
| <b>Protein-bound Ala</b> | <b><i>CGSI/TS1</i></b>                              | <b>-0.6339</b> | <b>0.0491</b> |
| Protein-bound Ala        | <i>DHDPS1</i>                                       | 0.0439         | 0.9041        |
| Protein-bound Ala        | <i>DHDPS2</i>                                       | 0.0583         | 0.8730        |
| Protein-bound Ala        | <i>DHDPSs</i>                                       | 0.0744         | 0.8382        |
| Protein-bound Ala        | <i>DHDPSs/AK-HSDHs</i>                              | -0.2798        | 0.4337        |
| Protein-bound Ala        | <i>DHDPSs/LKR-SDHI</i>                              | 0.1752         | 0.6282        |
| Protein-bound Ala        | Free (Lys+Met+Thr+Ile)/Asp                          | 0.3404         | 0.3358        |
| Protein-bound Ala        | Free Ala                                            | -0.0139        | 0.9696        |
| <b>Protein-bound Ala</b> | <b>Free Arg</b>                                     | <b>-0.4644</b> | <b>0.1763</b> |
| Protein-bound Ala        | Free Asn                                            | -0.3477        | 0.3249        |
| Protein-bound Ala        | Free Asn+Asp                                        | -0.3538        | 0.3159        |
| Protein-bound Ala        | Free Asn+Asp+Lys+Met+Thr+Ile                        | -0.0214        | 0.9532        |
| Protein-bound Ala        | Free Asn+Asp+Lys+Thr+Ile                            | -0.0170        | 0.9628        |
| Protein-bound Ala        | Free Asp                                            | -0.3510        | 0.3200        |
| Protein-bound Ala        | Free Asp+Lys+Met+Thr+Ile                            | 0.0045         | 0.9902        |
| Protein-bound Ala        | Free Cys                                            | -0.0635        | 0.8616        |
| Protein-bound Ala        | Free Gln                                            | -0.3371        | 0.3408        |
| <b>Protein-bound Ala</b> | <b>Free Glu</b>                                     | <b>-0.4530</b> | <b>0.1886</b> |
| Protein-bound Ala        | Free Gly                                            | -0.0470        | 0.8975        |
| Protein-bound Ala        | Free Gly/Thr                                        | 0.0801         | 0.8259        |
| Protein-bound Ala        | Free Gly+Ile                                        | -0.0429        | 0.9063        |
| Protein-bound Ala        | Free His                                            | -0.3279        | 0.3550        |
| Protein-bound Ala        | Free Ile                                            | 0.0565         | 0.8767        |
| Protein-bound Ala        | Free Ile/Thr                                        | 0.1069         | 0.7688        |
| Protein-bound Ala        | Free Leu                                            | -0.2878        | 0.4200        |
| <b>Protein-bound Ala</b> | <b>Free Lys</b>                                     | <b>-0.4781</b> | <b>0.1622</b> |
| Protein-bound Ala        | Free Lys/(Met+Thr+Ile)                              | 0.0050         | 0.9892        |
| Protein-bound Ala        | Free Lys/Asp                                        | 0.0002         | 0.9995        |
| Protein-bound Ala        | Free Lys/Thr                                        | 0.0354         | 0.9226        |
| Protein-bound Ala        | Free Lys+Met+Thr+Ile                                | 0.1519         | 0.6753        |
| <b>Protein-bound Ala</b> | <b>Free Met</b>                                     | <b>-0.5565</b> | <b>0.0948</b> |
| Protein-bound Ala        | Free Met/(Thr+Ile)                                  | -0.0314        | 0.9314        |
| Protein-bound Ala        | Free Met/Thr                                        | 0.0319         | 0.9304        |
| Protein-bound Ala        | Free Met+Thr+Ile                                    | 0.1692         | 0.6402        |
| Protein-bound Ala        | Free Phe                                            | -0.1366        | 0.7066        |
| <b>Protein-bound Ala</b> | <b>Free Pro</b>                                     | <b>-0.4670</b> | <b>0.1736</b> |
| Protein-bound Ala        | Free Ser                                            | 0.0136         | 0.9702        |
| Protein-bound Ala        | Free Thr                                            | 0.1758         | 0.6272        |
| Protein-bound Ala        | Free Thr/(Gly+Ile)                                  | 0.1627         | 0.6533        |
| Protein-bound Ala        | Free Thr/Asp                                        | 0.3419         | 0.3336        |
| Protein-bound Ala        | Free Trp                                            | -0.0620        | 0.8648        |
| Protein-bound Ala        | Free Tyr                                            | -0.2450        | 0.4951        |
| Protein-bound Ala        | Free Val                                            | 0.0831         | 0.8194        |
| Protein-bound Ala        | HSDH activity with four effectors                   | -0.0934        | 0.7974        |
| Protein-bound Ala        | HSDH activity without effectors                     | 0.1868         | 0.6053        |
| Protein-bound Ala        | <i>LKR-SDHI</i>                                     | 0.0231         | 0.9496        |
| Protein-bound Ala        | Lys-sensitive AK activity                           | 0.1653         | 0.6480        |
| Protein-bound Ala        | Lys-sensitive AK activity/Thr-sensitive AK activity | -0.3809        | 0.2775        |
| Protein-bound Ala        | <i>SAMS1</i>                                        | -0.1313        | 0.7177        |
| Protein-bound Ala        | <i>SAMS2</i>                                        | 0.0934         | 0.7974        |
| Protein-bound Ala        | <i>SAMS3</i>                                        | 0.2995         | 0.4006        |
| Protein-bound Ala        | <i>SAMS4</i>                                        | 0.3042         | 0.3928        |

|                          |                                               |                |               |
|--------------------------|-----------------------------------------------|----------------|---------------|
| Protein-bound Ala        | <i>SAMSs</i>                                  | 0.2274         | 0.5275        |
| Protein-bound Ala        | <i>TD1</i>                                    | 0.0684         | 0.8510        |
| <b>Protein-bound Ala</b> | <b><i>TD1/BCAT1</i></b>                       | <b>-0.4878</b> | <b>0.1526</b> |
| Protein-bound Ala        | <i>THA1</i>                                   | 0.2323         | 0.5184        |
| Protein-bound Ala        | <i>THA2</i>                                   | -0.1969        | 0.5856        |
| Protein-bound Ala        | <i>THAs</i>                                   | -0.2067        | 0.5667        |
| Protein-bound Ala        | <i>THAs+TD1</i>                               | 0.0355         | 0.9225        |
| <b>Protein-bound Ala</b> | <b>Thr-sensitive AK activity</b>              | <b>0.6035</b>  | <b>0.0647</b> |
| Protein-bound Ala        | Total free AAs                                | -0.3088        | 0.3854        |
| Protein-bound Ala        | <i>TS1</i>                                    | 0.3848         | 0.2722        |
| Protein-bound Ala        | <i>TS1/(THAs+TD1)</i>                         | 0.3609         | 0.3056        |
| Protein-bound Ala        | <i>TS1/TD1</i>                                | 0.2031         | 0.5735        |
| Protein-bound Ala        | <i>TS1/THAs</i>                               | 0.3298         | 0.3520        |
| Protein-bound Arg        | <i>(AK-HSDHs+CGS1)/SAMSs</i>                  | 0.1772         | 0.6244        |
| Protein-bound Arg        | <i>(AK-HSDHs+TS1)/(THAs+TD1)</i>              | 0.1891         | 0.6008        |
| <b>Protein-bound Arg</b> | <b><i>(AK-HSDHs+TS1+TD1)/BCAT1</i></b>        | <b>-0.5404</b> | <b>0.1068</b> |
| Protein-bound Arg        | <i>(AKs+AK-HSDHs)/AK-HSDHs</i>                | 0.3084         | 0.3860        |
| Protein-bound Arg        | <i>(AKs+AK-HSDHs+CGS1)/SAMSs</i>              | 0.1948         | 0.5896        |
| <b>Protein-bound Arg</b> | <b><i>(AKs+AK-HSDHs+DHDPSs)/LKR-SDHI</i></b>  | <b>-0.4006</b> | <b>0.2513</b> |
| Protein-bound Arg        | <i>(AKs+AK-HSDHs+TS1)/(THAs+TD1)</i>          | 0.2627         | 0.4634        |
| <b>Protein-bound Arg</b> | <b><i>(AKs+AK-HSDHs+TS1+TD1)/BCAT1</i></b>    | <b>-0.5343</b> | <b>0.1116</b> |
| Protein-bound Arg        | <i>(AKs+DHDPSs)/LKR-SDHI</i>                  | -0.3060        | 0.3898        |
| Protein-bound Arg        | AK activity with four effectors               | -0.3541        | 0.3155        |
| Protein-bound Arg        | AK activity without effectors                 | -0.1834        | 0.6120        |
| Protein-bound Arg        | AK activity/HSDH activity with four effectors | 0.0553         | 0.8795        |
| Protein-bound Arg        | AK activity/HSDH activity without effectors   | 0.0828         | 0.8201        |
| Protein-bound Arg        | <i>AK1</i>                                    | -0.1887        | 0.6017        |
| Protein-bound Arg        | <i>AK1+AK2</i>                                | -0.0836        | 0.8184        |
| Protein-bound Arg        | <i>AK1+AK3</i>                                | -0.2623        | 0.4640        |
| Protein-bound Arg        | <i>AK2</i>                                    | -0.0422        | 0.9078        |
| Protein-bound Arg        | <i>AK2+AK3</i>                                | -0.0601        | 0.8689        |
| Protein-bound Arg        | <i>AK3</i>                                    | -0.1074        | 0.7678        |
| Protein-bound Arg        | <i>AK-HSDH1</i>                               | -0.2946        | 0.4087        |
| <b>Protein-bound Arg</b> | <b><i>AK-HSDH2</i></b>                        | <b>-0.7196</b> | <b>0.0190</b> |
| <b>Protein-bound Arg</b> | <b><i>AK-HSDHs</i></b>                        | <b>-0.6365</b> | <b>0.0478</b> |
| <b>Protein-bound Arg</b> | <b><i>AK-HSDHs+CGS1</i></b>                   | <b>-0.7045</b> | <b>0.0229</b> |
| <b>Protein-bound Arg</b> | <b><i>AK-HSDHs+TS1</i></b>                    | <b>-0.6499</b> | <b>0.0419</b> |
| <b>Protein-bound Arg</b> | <b><i>AK-HSDHs+TS1+TD1</i></b>                | <b>-0.6733</b> | <b>0.0329</b> |
| <b>Protein-bound Arg</b> | <b><i>AK-HSDHs+TS1+THAs</i></b>               | <b>-0.6498</b> | <b>0.0420</b> |
| Protein-bound Arg        | <i>AKs</i>                                    | -0.1022        | 0.7787        |
| Protein-bound Arg        | <i>AKs/AK-HSDHs</i>                           | 0.3084         | 0.3860        |
| Protein-bound Arg        | <i>AKs+AK-HSDHs</i>                           | -0.2751        | 0.4417        |
| <b>Protein-bound Arg</b> | <b><i>AKs+AK-HSDHs+CGS1</i></b>               | <b>-0.4050</b> | <b>0.2456</b> |
| Protein-bound Arg        | <i>AKs+AK-HSDHs+DHDPSs</i>                    | -0.3005        | 0.3989        |
| <b>Protein-bound Arg</b> | <b><i>AKs+AK-HSDHs+TS1</i></b>                | <b>-0.4834</b> | <b>0.1569</b> |
| <b>Protein-bound Arg</b> | <b><i>AKs+AK-HSDHs+TS1+TD1</i></b>            | <b>-0.5139</b> | <b>0.1286</b> |
| <b>Protein-bound Arg</b> | <b><i>AKs+AK-HSDHs+TS1+THAs</i></b>           | <b>-0.4811</b> | <b>0.1592</b> |
| Protein-bound Arg        | <i>AKs+DHDPSs</i>                             | -0.1310        | 0.7182        |
| <b>Protein-bound Arg</b> | <b><i>BCAT1</i></b>                           | <b>0.6135</b>  | <b>0.0592</b> |
| <b>Protein-bound Arg</b> | <b>Biosynthetic genes analyzed</b>            | <b>-0.5662</b> | <b>0.0879</b> |
| <b>Protein-bound Arg</b> | <b>Catabolic genes analyzed</b>               | <b>-0.7034</b> | <b>0.0232</b> |
| <b>Protein-bound Arg</b> | <b><i>CGS1</i></b>                            | <b>-0.6407</b> | <b>0.0459</b> |
| <b>Protein-bound Arg</b> | <b><i>CGS1/SAMSs</i></b>                      | <b>0.4104</b>  | <b>0.2387</b> |
| Protein-bound Arg        | <i>CGS1/TS1</i>                               | 0.1467         | 0.6858        |
| <b>Protein-bound Arg</b> | <b><i>DHDPS1</i></b>                          | <b>-0.4112</b> | <b>0.2378</b> |
| <b>Protein-bound Arg</b> | <b><i>DHDPS2</i></b>                          | <b>-0.6894</b> | <b>0.0274</b> |
| <b>Protein-bound Arg</b> | <b><i>DHDPSs</i></b>                          | <b>-0.7291</b> | <b>0.0167</b> |

|                          |                                                     |                |               |
|--------------------------|-----------------------------------------------------|----------------|---------------|
| <b>Protein-bound Arg</b> | <i>DHDPSs/AK-HSDHs</i>                              | <b>0.4496</b>  | <b>0.1923</b> |
| <b>Protein-bound Arg</b> | <i>DHDPSs/LKR-SDHI</i>                              | <b>-0.6478</b> | <b>0.0428</b> |
| Protein-bound Arg        | Free (Lys+Met+Thr+Ile)/Asp                          | 0.1028         | 0.7774        |
| <b>Protein-bound Arg</b> | <b>Free Ala</b>                                     | <b>-0.5533</b> | <b>0.0971</b> |
| <b>Protein-bound Arg</b> | <b>Free Arg</b>                                     | <b>-0.9048</b> | <b>0.0003</b> |
| <b>Protein-bound Arg</b> | <b>Free Asn</b>                                     | <b>-0.8118</b> | <b>0.0043</b> |
| <b>Protein-bound Arg</b> | <b>Free Asn+Asp</b>                                 | <b>-0.5292</b> | <b>0.1157</b> |
| Protein-bound Arg        | Free Asn+Asp+Lys+Met+Thr+Ile                        | -0.3182        | 0.3703        |
| Protein-bound Arg        | Free Asn+Asp+Lys+Thr+Ile                            | -0.3135        | 0.3777        |
| <b>Protein-bound Arg</b> | <b>Free Asp</b>                                     | <b>-0.4780</b> | <b>0.1623</b> |
| Protein-bound Arg        | Free Asp+Lys+Met+Thr+Ile                            | -0.2716        | 0.4477        |
| Protein-bound Arg        | Free Cys                                            | -0.3623        | 0.3036        |
| <b>Protein-bound Arg</b> | <b>Free Gln</b>                                     | <b>-0.8129</b> | <b>0.0042</b> |
| Protein-bound Arg        | Free Glu                                            | -0.3967        | 0.2564        |
| <b>Protein-bound Arg</b> | <b>Free Gly</b>                                     | <b>-0.5923</b> | <b>0.0712</b> |
| Protein-bound Arg        | Free Gly/Thr                                        | 0.0023         | 0.9950        |
| <b>Protein-bound Arg</b> | <b>Free Gly+Ile</b>                                 | <b>-0.6191</b> | <b>0.0563</b> |
| <b>Protein-bound Arg</b> | <b>Free His</b>                                     | <b>-0.8831</b> | <b>0.0007</b> |
| <b>Protein-bound Arg</b> | <b>Free Ile</b>                                     | <b>-0.5201</b> | <b>0.1233</b> |
| Protein-bound Arg        | Free Ile/Thr                                        | 0.1332         | 0.7137        |
| <b>Protein-bound Arg</b> | <b>Free Leu</b>                                     | <b>-0.7528</b> | <b>0.0120</b> |
| <b>Protein-bound Arg</b> | <b>Free Lys</b>                                     | <b>-0.7468</b> | <b>0.0131</b> |
| Protein-bound Arg        | Free Lys/(Met+Thr+Ile)                              | -0.0058        | 0.9873        |
| Protein-bound Arg        | Free Lys/Asp                                        | -0.1838        | 0.6112        |
| Protein-bound Arg        | Free Lys/Thr                                        | 0.0352         | 0.9232        |
| Protein-bound Arg        | Free Lys+Met+Thr+Ile                                | -0.0807        | 0.8245        |
| Protein-bound Arg        | Free Met                                            | -0.3924        | 0.2620        |
| Protein-bound Arg        | Free Met/(Thr+Ile)                                  | 0.0471         | 0.8973        |
| Protein-bound Arg        | Free Met/Thr                                        | 0.1426         | 0.6943        |
| Protein-bound Arg        | Free Met+Thr+Ile                                    | -0.0532        | 0.8839        |
| <b>Protein-bound Arg</b> | <b>Free Phe</b>                                     | <b>-0.7281</b> | <b>0.0170</b> |
| <b>Protein-bound Arg</b> | <b>Free Pro</b>                                     | <b>-0.6827</b> | <b>0.0296</b> |
| <b>Protein-bound Arg</b> | <b>Free Ser</b>                                     | <b>-0.4586</b> | <b>0.1825</b> |
| Protein-bound Arg        | Free Thr                                            | -0.0394        | 0.9140        |
| Protein-bound Arg        | Free Thr/(Gly+Ile)                                  | 0.0564         | 0.8770        |
| Protein-bound Arg        | Free Thr/Asp                                        | 0.1102         | 0.7619        |
| <b>Protein-bound Arg</b> | <b>Free Trp</b>                                     | <b>-0.7489</b> | <b>0.0127</b> |
| <b>Protein-bound Arg</b> | <b>Free Tyr</b>                                     | <b>-0.5851</b> | <b>0.0756</b> |
| <b>Protein-bound Arg</b> | <b>Free Val</b>                                     | <b>-0.6115</b> | <b>0.0603</b> |
| <b>Protein-bound Arg</b> | <b>HSDH activity with four effectors</b>            | <b>-0.7135</b> | <b>0.0205</b> |
| <b>Protein-bound Arg</b> | <b>HSDH activity without effectors</b>              | <b>-0.4430</b> | <b>0.1997</b> |
| Protein-bound Arg        | <i>LKR-SDHI</i>                                     | 0.3864         | 0.2701        |
| Protein-bound Arg        | Lys-sensitive AK activity                           | 0.1963         | 0.5868        |
| Protein-bound Arg        | Lys-sensitive AK activity/Thr-sensitive AK activity | -0.0799        | 0.8264        |
| Protein-bound Arg        | Protein-bound Ala                                   | 0.2463         | 0.4928        |
| <b>Protein-bound Arg</b> | <b>SAMS1</b>                                        | <b>-0.4666</b> | <b>0.1740</b> |
| <b>Protein-bound Arg</b> | <b>SAMS2</b>                                        | <b>-0.5728</b> | <b>0.0835</b> |
| <b>Protein-bound Arg</b> | <b>SAMS3</b>                                        | <b>-0.5637</b> | <b>0.0897</b> |
| <b>Protein-bound Arg</b> | <b>SAMS4</b>                                        | <b>-0.6668</b> | <b>0.0352</b> |
| <b>Protein-bound Arg</b> | <b>SAMSs</b>                                        | <b>-0.7030</b> | <b>0.0233</b> |
| <b>Protein-bound Arg</b> | <b>TD1</b>                                          | <b>-0.7130</b> | <b>0.0206</b> |
| <b>Protein-bound Arg</b> | <b>TD1/BCAT1</b>                                    | <b>-0.5850</b> | <b>0.0757</b> |
| <b>Protein-bound Arg</b> | <b>THA1</b>                                         | <b>0.6611</b>  | <b>0.0374</b> |
| Protein-bound Arg        | <i>THA2</i>                                         | -0.1843        | 0.6103        |
| Protein-bound Arg        | <i>THAs</i>                                         | -0.1189        | 0.7436        |
| <b>Protein-bound Arg</b> | <b>THAs+TD1</b>                                     | <b>-0.7140</b> | <b>0.0204</b> |
| Protein-bound Arg        | Thr-sensitive AK activity                           | 0.1768         | 0.6252        |
| <b>Protein-bound Arg</b> | <b>Total free AAs</b>                               | <b>-0.6683</b> | <b>0.0347</b> |

|                                          |                                               |                |               |
|------------------------------------------|-----------------------------------------------|----------------|---------------|
| <b>Protein-bound Arg</b>                 | <i>TS1</i>                                    | <b>-0.5684</b> | <b>0.0865</b> |
| <b>Protein-bound Arg</b>                 | <i>TS1/(THAs+TD1)</i>                         | <b>0.4076</b>  | <b>0.2423</b> |
| Protein-bound Arg                        | <i>TS1/TD1</i>                                | 0.3260         | 0.3580        |
| <b>Protein-bound Arg</b>                 | <i>TS1/THAs</i>                               | <b>-0.6256</b> | <b>0.0530</b> |
| Protein-bound Asn+Asp+Ile+Lys+Thr        | <i>(AK-HSDHs+CGS1)/SAMsS</i>                  | -0.1843        | 0.6103        |
| <b>Protein-bound Asn+Asp+Ile+Lys+Thr</b> | <i>(AK-HSDHs+TS1)/(THAs+TD1)</i>              | <b>0.4153</b>  | <b>0.2327</b> |
| <b>Protein-bound Asn+Asp+Ile+Lys+Thr</b> | <i>(AK-HSDHs+TS1+TD1)/BCAT1</i>               | <b>-0.4577</b> | <b>0.1835</b> |
| Protein-bound Asn+Asp+Ile+Lys+Thr        | <i>(AKs+AK-HSDHs)/AK-HSDHs</i>                | -0.3224        | 0.3637        |
| Protein-bound Asn+Asp+Ile+Lys+Thr        | <i>(AKs+AK-HSDHs+CGS1)/SAMsS</i>              | -0.2831        | 0.4279        |
| Protein-bound Asn+Asp+Ile+Lys+Thr        | <i>(AKs+AK-HSDHs+DHDPSs)/LKR-SDHI</i>         | 0.0136         | 0.9702        |
| Protein-bound Asn+Asp+Ile+Lys+Thr        | <i>(AKs+AK-HSDHs+TS1)/(THAs+TD1)</i>          | 0.1821         | 0.6146        |
| <b>Protein-bound Asn+Asp+Ile+Lys+Thr</b> | <i>(AKs+AK-HSDHs+TS1+TD1)/BCAT1</i>           | <b>-0.4761</b> | <b>0.1642</b> |
| Protein-bound Asn+Asp+Ile+Lys+Thr        | <i>(AKs+DHDPSs)/LKR-SDHI</i>                  | -0.0580        | 0.8736        |
| Protein-bound Asn+Asp+Ile+Lys+Thr        | AK activity with four effectors               | 0.0074         | 0.9838        |
| Protein-bound Asn+Asp+Ile+Lys+Thr        | AK activity without effectors                 | 0.2256         | 0.5308        |
| Protein-bound Asn+Asp+Ile+Lys+Thr        | AK activity/HSDH activity with four effectors | 0.0265         | 0.9421        |
| Protein-bound Asn+Asp+Ile+Lys+Thr        | AK activity/HSDH activity without effectors   | -0.0877        | 0.8096        |
| Protein-bound Asn+Asp+Ile+Lys+Thr        | <i>AK1</i>                                    | -0.2402        | 0.5039        |
| Protein-bound Asn+Asp+Ile+Lys+Thr        | <i>AK1+AK2</i>                                | -0.2838        | 0.4268        |
| Protein-bound Asn+Asp+Ile+Lys+Thr        | <i>AK1+AK3</i>                                | -0.1590        | 0.6609        |
| Protein-bound Asn+Asp+Ile+Lys+Thr        | <i>AK2</i>                                    | -0.2250        | 0.5321        |
| Protein-bound Asn+Asp+Ile+Lys+Thr        | <i>AK2+AK3</i>                                | -0.2051        | 0.5698        |
| Protein-bound Asn+Asp+Ile+Lys+Thr        | <i>AK3</i>                                    | 0.0747         | 0.8375        |
| <b>Protein-bound Asn+Asp+Ile+Lys+Thr</b> | <i>AK-HSDHI</i>                               | <b>0.5224</b>  | <b>0.1214</b> |
| Protein-bound Asn+Asp+Ile+Lys+Thr        | <i>AK-HSDH2</i>                               | -0.1923        | 0.5946        |
| Protein-bound Asn+Asp+Ile+Lys+Thr        | <i>AK-HSDHs</i>                               | 0.1663         | 0.6460        |
| Protein-bound Asn+Asp+Ile+Lys+Thr        | <i>AK-HSDHs+CGS1</i>                          | 0.0437         | 0.9045        |
| Protein-bound Asn+Asp+Ile+Lys+Thr        | <i>AK-HSDHs+TS1</i>                           | 0.3062         | 0.3896        |
| Protein-bound Asn+Asp+Ile+Lys+Thr        | <i>AK-HSDHs+TS1+TD1</i>                       | 0.2760         | 0.4402        |
| Protein-bound Asn+Asp+Ile+Lys+Thr        | <i>AK-HSDHs+TS1+THAs</i>                      | 0.3030         | 0.3948        |
| Protein-bound Asn+Asp+Ile+Lys+Thr        | <i>AKs</i>                                    | -0.2660        | 0.4575        |
| Protein-bound Asn+Asp+Ile+Lys+Thr        | <i>AKs/AK-HSDHs</i>                           | -0.3224        | 0.3637        |
| Protein-bound Asn+Asp+Ile+Lys+Thr        | <i>AKs+AK-HSDHs</i>                           | -0.2336        | 0.5160        |
| Protein-bound Asn+Asp+Ile+Lys+Thr        | <i>AKs+AK-HSDHs+CGS1</i>                      | -0.2411        | 0.5023        |
| Protein-bound Asn+Asp+Ile+Lys+Thr        | <i>AKs+AK-HSDHs+DHDPSs</i>                    | -0.2341        | 0.5151        |
| Protein-bound Asn+Asp+Ile+Lys+Thr        | <i>AKs+AK-HSDHs+TS1</i>                       | -0.0280        | 0.9388        |
| Protein-bound Asn+Asp+Ile+Lys+Thr        | <i>AKs+AK-HSDHs+TS1+TD1</i>                   | -0.0328        | 0.9283        |
| Protein-bound Asn+Asp+Ile+Lys+Thr        | <i>AKs+AK-HSDHs+TS1+THAs</i>                  | -0.0300        | 0.9344        |
| Protein-bound Asn+Asp+Ile+Lys+Thr        | <i>AKs+DHDPSs</i>                             | -0.2683        | 0.4535        |
| <b>Protein-bound Asn+Asp+Ile+Lys+Thr</b> | <i>BCAT1</i>                                  | <b>0.6170</b>  | <b>0.0574</b> |
| Protein-bound Asn+Asp+Ile+Lys+Thr        | Biosynthetic genes analyzed                   | -0.0431        | 0.9059        |
| Protein-bound Asn+Asp+Ile+Lys+Thr        | Catabolic genes analyzed                      | 0.0739         | 0.8391        |
| Protein-bound Asn+Asp+Ile+Lys+Thr        | <i>CGS1</i>                                   | -0.0953        | 0.7934        |
| Protein-bound Asn+Asp+Ile+Lys+Thr        | <i>CGS1/SAMsS</i>                             | -0.2638        | 0.4615        |
| <b>Protein-bound Asn+Asp+Ile+Lys+Thr</b> | <i>CGS1/TS1</i>                               | <b>-0.5442</b> | <b>0.1039</b> |
| Protein-bound Asn+Asp+Ile+Lys+Thr        | <i>DHDPS1</i>                                 | -0.1610        | 0.6569        |
| Protein-bound Asn+Asp+Ile+Lys+Thr        | <i>DHDPS2</i>                                 | 0.0191         | 0.9581        |
| Protein-bound Asn+Asp+Ile+Lys+Thr        | <i>DHDPSs</i>                                 | -0.0859        | 0.8134        |
| Protein-bound Asn+Asp+Ile+Lys+Thr        | <i>DHDPSs/AK-HSDHs</i>                        | -0.2340        | 0.5152        |
| Protein-bound Asn+Asp+Ile+Lys+Thr        | <i>DHDPSs/LKR-SDHI</i>                        | 0.1154         | 0.7508        |
| Protein-bound Asn+Asp+Ile+Lys+Thr        | Free (Lys+Met+Thr+Ile)/Asp                    | 0.2126         | 0.5554        |
| Protein-bound Asn+Asp+Ile+Lys+Thr        | Free Ala                                      | -0.1196        | 0.7422        |
| <b>Protein-bound Asn+Asp+Ile+Lys+Thr</b> | <b>Free Arg</b>                               | <b>-0.5595</b> | <b>0.0926</b> |
| <b>Protein-bound Asn+Asp+Ile+Lys+Thr</b> | <b>Free Asn</b>                               | <b>-0.4925</b> | <b>0.1482</b> |
| <b>Protein-bound Asn+Asp+Ile+Lys+Thr</b> | <b>Free Asn+Asp</b>                           | <b>-0.4638</b> | <b>0.1770</b> |
| Protein-bound Asn+Asp+Ile+Lys+Thr        | Free Asn+Asp+Lys+Met+Thr+Ile                  | -0.2325        | 0.5181        |
| Protein-bound Asn+Asp+Ile+Lys+Thr        | Free Asn+Asp+Lys+Thr+Ile                      | -0.2286        | 0.5252        |

|                                          |                                                            |                |                  |
|------------------------------------------|------------------------------------------------------------|----------------|------------------|
| <b>Protein-bound Asn+Asp+Ile+Lys+Thr</b> | <b>Free Asp</b>                                            | <b>-0.4572</b> | <b>0.1841</b>    |
| Protein-bound Asn+Asp+Ile+Lys+Thr        | Free Asp+Lys+Met+Thr+Ile                                   | -0.2040        | 0.5718           |
| Protein-bound Asn+Asp+Ile+Lys+Thr        | Free Cys                                                   | -0.3037        | 0.3937           |
| <b>Protein-bound Asn+Asp+Ile+Lys+Thr</b> | <b>Free Gln</b>                                            | <b>-0.5132</b> | <b>0.1293</b>    |
| <b>Protein-bound Asn+Asp+Ile+Lys+Thr</b> | <b>Free Glu</b>                                            | <b>-0.5194</b> | <b>0.1239</b>    |
| Protein-bound Asn+Asp+Ile+Lys+Thr        | Free Gly                                                   | -0.2664        | 0.4569           |
| Protein-bound Asn+Asp+Ile+Lys+Thr        | Free Gly/Thr                                               | 0.1302         | 0.7200           |
| Protein-bound Asn+Asp+Ile+Lys+Thr        | Free Gly+Ile                                               | -0.2695        | 0.4515           |
| <b>Protein-bound Asn+Asp+Ile+Lys+Thr</b> | <b>Free His</b>                                            | <b>-0.4340</b> | <b>0.2101</b>    |
| Protein-bound Asn+Asp+Ile+Lys+Thr        | Free Ile                                                   | -0.0924        | 0.7996           |
| Protein-bound Asn+Asp+Ile+Lys+Thr        | Free Ile/Thr                                               | 0.2696         | 0.4514           |
| Protein-bound Asn+Asp+Ile+Lys+Thr        | Free Leu                                                   | -0.3563        | 0.3123           |
| <b>Protein-bound Asn+Asp+Ile+Lys+Thr</b> | <b>Free Lys</b>                                            | <b>-0.5343</b> | <b>0.1116</b>    |
| Protein-bound Asn+Asp+Ile+Lys+Thr        | Free Lys/(Met+Thr+Ile)                                     | 0.1459         | 0.6875           |
| Protein-bound Asn+Asp+Ile+Lys+Thr        | Free Lys/Asp                                               | 0.0263         | 0.9424           |
| Protein-bound Asn+Asp+Ile+Lys+Thr        | Free Lys/Thr                                               | 0.1919         | 0.5953           |
| Protein-bound Asn+Asp+Ile+Lys+Thr        | Free Lys+Met+Thr+Ile                                       | -0.0227        | 0.9503           |
| <b>Protein-bound Asn+Asp+Ile+Lys+Thr</b> | <b>Free Met</b>                                            | <b>-0.4945</b> | <b>0.1463</b>    |
| Protein-bound Asn+Asp+Ile+Lys+Thr        | Free Met/(Thr+Ile)                                         | 0.1060         | 0.7708           |
| Protein-bound Asn+Asp+Ile+Lys+Thr        | Free Met/Thr                                               | 0.1933         | 0.5926           |
| Protein-bound Asn+Asp+Ile+Lys+Thr        | Free Met+Thr+Ile                                           | -0.0031        | 0.9932           |
| Protein-bound Asn+Asp+Ile+Lys+Thr        | Free Phe                                                   | -0.2107        | 0.5591           |
| <b>Protein-bound Asn+Asp+Ile+Lys+Thr</b> | <b>Free Pro</b>                                            | <b>-0.5928</b> | <b>0.0709</b>    |
| Protein-bound Asn+Asp+Ile+Lys+Thr        | Free Ser                                                   | -0.1611        | 0.6567           |
| Protein-bound Asn+Asp+Ile+Lys+Thr        | Free Thr                                                   | 0.0058         | 0.9874           |
| Protein-bound Asn+Asp+Ile+Lys+Thr        | Free Thr/(Gly+Ile)                                         | 0.0289         | 0.9369           |
| Protein-bound Asn+Asp+Ile+Lys+Thr        | Free Thr/Asp                                               | 0.2103         | 0.5597           |
| Protein-bound Asn+Asp+Ile+Lys+Thr        | Free Trp                                                   | -0.1673        | 0.6441           |
| Protein-bound Asn+Asp+Ile+Lys+Thr        | Free Tyr                                                   | -0.2566        | 0.4741           |
| Protein-bound Asn+Asp+Ile+Lys+Thr        | Free Val                                                   | 0.0725         | 0.8423           |
| Protein-bound Asn+Asp+Ile+Lys+Thr        | HSDH activity with four effectors                          | -0.1762        | 0.6262           |
| Protein-bound Asn+Asp+Ile+Lys+Thr        | HSDH activity without effectors                            | 0.1022         | 0.7788           |
| Protein-bound Asn+Asp+Ile+Lys+Thr        | <i>LKR-SDHI</i>                                            | -0.0155        | 0.9660           |
| Protein-bound Asn+Asp+Ile+Lys+Thr        | Lys-sensitive AK activity                                  | 0.2132         | 0.5542           |
| <b>Protein-bound Asn+Asp+Ile+Lys+Thr</b> | <b>Lys-sensitive AK activity/Thr-sensitive AK activity</b> | <b>-0.4173</b> | <b>0.2303</b>    |
| <b>Protein-bound Asn+Asp+Ile+Lys+Thr</b> | <b>Protein-bound Ala</b>                                   | <b>0.9225</b>  | <b>0.0001</b>    |
| <b>Protein-bound Asn+Asp+Ile+Lys+Thr</b> | <b>Protein-bound Arg</b>                                   | <b>0.4629</b>  | <b>0.1779</b>    |
| <b>Protein-bound Asn+Asp+Ile+Lys+Thr</b> | <b>Protein-bound Gly</b>                                   | <b>0.8414</b>  | <b>0.0023</b>    |
| <b>Protein-bound Asn+Asp+Ile+Lys+Thr</b> | <b>Protein-bound His</b>                                   | <b>0.4071</b>  | <b>0.2429</b>    |
| <b>Protein-bound Asn+Asp+Ile+Lys+Thr</b> | <b>Protein-bound Ile</b>                                   | <b>0.4856</b>  | <b>0.1547</b>    |
| <b>Protein-bound Asn+Asp+Ile+Lys+Thr</b> | <b>Protein-bound Leu</b>                                   | <b>0.5540</b>  | <b>0.0966</b>    |
| <b>Protein-bound Asn+Asp+Ile+Lys+Thr</b> | <b>Protein-bound Lys</b>                                   | <b>0.4813</b>  | <b>0.1590</b>    |
| Protein-bound Asn+Asp+Ile+Lys+Thr        | Protein-bound Phe                                          | 0.3784         | 0.2810           |
| <b>Protein-bound Asn+Asp+Ile+Lys+Thr</b> | <b>Protein-bound Pro</b>                                   | <b>0.9192</b>  | <b>0.0002</b>    |
| <b>Protein-bound Asn+Asp+Ile+Lys+Thr</b> | <b>Protein-bound Ser</b>                                   | <b>0.9462</b>  | <b>&lt;.0001</b> |
| <b>Protein-bound Asn+Asp+Ile+Lys+Thr</b> | <b>Protein-bound Thr</b>                                   | <b>0.9487</b>  | <b>&lt;.0001</b> |
| <b>Protein-bound Asn+Asp+Ile+Lys+Thr</b> | <b>Protein-bound Tyr</b>                                   | <b>0.8141</b>  | <b>0.0041</b>    |
| <b>Protein-bound Asn+Asp+Ile+Lys+Thr</b> | <b>Protein-bound Val</b>                                   | <b>0.4465</b>  | <b>0.1959</b>    |
| Protein-bound Asn+Asp+Ile+Lys+Thr        | <i>SAMS1</i>                                               | -0.2218        | 0.5379           |
| Protein-bound Asn+Asp+Ile+Lys+Thr        | <i>SAMS2</i>                                               | -0.0749        | 0.8371           |
| Protein-bound Asn+Asp+Ile+Lys+Thr        | <i>SAMS3</i>                                               | 0.1595         | 0.6599           |
| Protein-bound Asn+Asp+Ile+Lys+Thr        | <i>SAMS4</i>                                               | 0.1890         | 0.6010           |
| Protein-bound Asn+Asp+Ile+Lys+Thr        | <i>SAMSs</i>                                               | 0.0703         | 0.8469           |
| Protein-bound Asn+Asp+Ile+Lys+Thr        | <i>TD1</i>                                                 | -0.0872        | 0.8106           |
| <b>Protein-bound Asn+Asp+Ile+Lys+Thr</b> | <b><i>TD1/BCAT1</i></b>                                    | <b>-0.4737</b> | <b>0.1666</b>    |
| Protein-bound Asn+Asp+Ile+Lys+Thr        | <i>THA1</i>                                                | 0.2812         | 0.4312           |
| Protein-bound Asn+Asp+Ile+Lys+Thr        | <i>THA2</i>                                                | -0.1943        | 0.5907           |
| Protein-bound Asn+Asp+Ile+Lys+Thr        | <i>THAs</i>                                                | -0.1891        | 0.6009           |

|                                          |                                               |                |                  |
|------------------------------------------|-----------------------------------------------|----------------|------------------|
| Protein-bound Asn+Asp+Ile+Lys+Thr        | <i>THAs+TDI</i>                               | -0.1136        | 0.7548           |
| <b>Protein-bound Asn+Asp+Ile+Lys+Thr</b> | <b>Thr-sensitive AK activity</b>              | <b>0.7623</b>  | <b>0.0104</b>    |
| <b>Protein-bound Asn+Asp+Ile+Lys+Thr</b> | <b>Total free AAs</b>                         | <b>-0.4878</b> | <b>0.1526</b>    |
| <b>Protein-bound Asn+Asp+Ile+Lys+Thr</b> | <b>Total protein-bound AAs</b>                | <b>0.9807</b>  | <b>&lt;.0001</b> |
| Protein-bound Asn+Asp+Ile+Lys+Thr        | <i>TSI</i>                                    | 0.3282         | 0.3545           |
| <b>Protein-bound Asn+Asp+Ile+Lys+Thr</b> | <b><i>TSI/(THAs+TDI)</i></b>                  | <b>0.5099</b>  | <b>0.1322</b>    |
| Protein-bound Asn+Asp+Ile+Lys+Thr        | <i>TSI/TDI</i>                                | 0.3113         | 0.3812           |
| Protein-bound Asn+Asp+Ile+Lys+Thr        | <i>TSI/THAs</i>                               | 0.1101         | 0.7620           |
| Protein-bound Asp+Asn                    | <i>(AK-HSDHs+CGSI)/SAMSs</i>                  | -0.2488        | 0.4883           |
| <b>Protein-bound Asp+Asn</b>             | <b><i>(AK-HSDHs+TSI)/(THAs+TDI)</i></b>       | <b>0.4651</b>  | <b>0.1756</b>    |
| <b>Protein-bound Asp+Asn</b>             | <b><i>(AK-HSDHs+TSI+TDI)/BCATI</i></b>        | <b>-0.4368</b> | <b>0.2069</b>    |
| Protein-bound Asp+Asn                    | <i>(AKs+AK-HSDHs)/AK-HSDHs</i>                | -0.3564        | 0.3120           |
| Protein-bound Asp+Asn                    | <i>(AKs+AK-HSDHs+CGSI)/SAMSs</i>              | -0.2978        | 0.4033           |
| Protein-bound Asp+Asn                    | <i>(AKs+AK-HSDHs+DHDPSs)/LKR-SDHI</i>         | 0.1862         | 0.6065           |
| Protein-bound Asp+Asn                    | <i>(AKs+AK-HSDHs+TSI)/(THAs+TDI)</i>          | 0.2416         | 0.5012           |
| <b>Protein-bound Asp+Asn</b>             | <b><i>(AKs+AK-HSDHs+TSI+TDI)/BCATI</i></b>    | <b>-0.4567</b> | <b>0.1846</b>    |
| Protein-bound Asp+Asn                    | <i>(AKs+DHDPSs)/LKR-SDHI</i>                  | 0.0979         | 0.7879           |
| Protein-bound Asp+Asn                    | AK activity with four effectors               | 0.2469         | 0.4916           |
| <b>Protein-bound Asp+Asn</b>             | <b>AK activity without effectors</b>          | <b>0.4578</b>  | <b>0.1834</b>    |
| Protein-bound Asp+Asn                    | AK activity/HSDH activity with four effectors | 0.1444         | 0.6907           |
| Protein-bound Asp+Asn                    | AK activity/HSDH activity without effectors   | -0.0229        | 0.9500           |
| Protein-bound Asp+Asn                    | <i>AK1</i>                                    | -0.1609        | 0.6571           |
| Protein-bound Asp+Asn                    | <i>AK1+AK2</i>                                | -0.2061        | 0.5677           |
| Protein-bound Asp+Asn                    | <i>AK1+AK3</i>                                | -0.0692        | 0.8493           |
| Protein-bound Asp+Asn                    | <i>AK2</i>                                    | -0.1664        | 0.6460           |
| Protein-bound Asp+Asn                    | <i>AK2+AK3</i>                                | -0.1449        | 0.6897           |
| Protein-bound Asp+Asn                    | <i>AK3</i>                                    | 0.0913         | 0.8020           |
| <b>Protein-bound Asp+Asn</b>             | <b><i>AK-HSDHI</i></b>                        | <b>0.6743</b>  | <b>0.0325</b>    |
| Protein-bound Asp+Asn                    | <i>AK-HSDH2</i>                               | -0.0874        | 0.8102           |
| Protein-bound Asp+Asn                    | <i>AK-HSDHs</i>                               | 0.3200         | 0.3673           |
| Protein-bound Asp+Asn                    | <i>AK-HSDHs+CGSI</i>                          | 0.2071         | 0.5659           |
| <b>Protein-bound Asp+Asn</b>             | <b><i>AK-HSDHs+TSI</i></b>                    | <b>0.4518</b>  | <b>0.1900</b>    |
| <b>Protein-bound Asp+Asn</b>             | <b><i>AK-HSDHs+TSI+TDI</i></b>                | <b>0.4199</b>  | <b>0.2270</b>    |
| <b>Protein-bound Asp+Asn</b>             | <b><i>AK-HSDHs+TSI+THAs</i></b>               | <b>0.4497</b>  | <b>0.1923</b>    |
| Protein-bound Asp+Asn                    | <i>AKs</i>                                    | -0.1864        | 0.6060           |
| Protein-bound Asp+Asn                    | <i>AKs/AK-HSDHs</i>                           | -0.3564        | 0.3120           |
| Protein-bound Asp+Asn                    | <i>AKs+AK-HSDHs</i>                           | -0.1099        | 0.7625           |
| Protein-bound Asp+Asn                    | <i>AKs+AK-HSDHs+CGSI</i>                      | -0.0923        | 0.7998           |
| Protein-bound Asp+Asn                    | <i>AKs+AK-HSDHs+DHDPSs</i>                    | -0.1084        | 0.7656           |
| Protein-bound Asp+Asn                    | <i>AKs+AK-HSDHs+TSI</i>                       | 0.1264         | 0.7278           |
| Protein-bound Asp+Asn                    | <i>AKs+AK-HSDHs+TSI+TDI</i>                   | 0.1226         | 0.7358           |
| Protein-bound Asp+Asn                    | <i>AKs+AK-HSDHs+TSI+THAs</i>                  | 0.1249         | 0.7310           |
| Protein-bound Asp+Asn                    | <i>AKs+DHDPSs</i>                             | -0.1858        | 0.6074           |
| <b>Protein-bound Asp+Asn</b>             | <b><i>BCATI</i></b>                           | <b>0.6229</b>  | <b>0.0544</b>    |
| Protein-bound Asp+Asn                    | Biosynthetic genes analyzed                   | 0.1226         | 0.7358           |
| Protein-bound Asp+Asn                    | Catabolic genes analyzed                      | 0.2509         | 0.4845           |
| Protein-bound Asp+Asn                    | <i>CGSI</i>                                   | 0.0460         | 0.8995           |
| Protein-bound Asp+Asn                    | <i>CGSI/SAMSs</i>                             | -0.3865        | 0.2700           |
| <b>Protein-bound Asp+Asn</b>             | <b><i>CGSI/TSI</i></b>                        | <b>-0.5819</b> | <b>0.0776</b>    |
| Protein-bound Asp+Asn                    | <i>DHDPS1</i>                                 | -0.1250        | 0.7309           |
| Protein-bound Asp+Asn                    | <i>DHDPS2</i>                                 | 0.1031         | 0.7769           |
| Protein-bound Asp+Asn                    | <i>DHDPSs</i>                                 | -0.0015        | 0.9967           |
| Protein-bound Asp+Asn                    | <i>DHDPSs/AK-HSDHs</i>                        | -0.3672        | 0.2966           |
| Protein-bound Asp+Asn                    | <i>DHDPSs/LKR-SDHI</i>                        | 0.2558         | 0.4757           |
| Protein-bound Asp+Asn                    | Free (Lys+Met+Thr+Ile)/Asp                    | 0.3726         | 0.2889           |
| Protein-bound Asp+Asn                    | Free Ala                                      | -0.1292        | 0.7220           |
| <b>Protein-bound Asp+Asn</b>             | <b>Free Arg</b>                               | <b>-0.4102</b> | <b>0.2391</b>    |



|                              |                                                     |                |                  |
|------------------------------|-----------------------------------------------------|----------------|------------------|
| <b>Protein-bound Asp+Asn</b> | <b>Free Asn</b>                                     | <b>-0.4130</b> | <b>0.2355</b>    |
| <b>Protein-bound Asp+Asn</b> | <b>Free Asn+Asp</b>                                 | <b>-0.4991</b> | <b>0.1420</b>    |
| Protein-bound Asp+Asn        | Free Asn+Asp+Lys+Met+Thr+Ile                        | -0.1191        | 0.7431           |
| Protein-bound Asp+Asn        | Free Asn+Asp+Lys+Thr+Ile                            | -0.1147        | 0.7524           |
| <b>Protein-bound Asp+Asn</b> | <b>Free Asp</b>                                     | <b>-0.5073</b> | <b>0.1345</b>    |
| Protein-bound Asp+Asn        | Free Asp+Lys+Met+Thr+Ile                            | -0.0923        | 0.7998           |
| Protein-bound Asp+Asn        | Free Cys                                            | -0.1415        | 0.6966           |
| <b>Protein-bound Asp+Asn</b> | <b>Free Gln</b>                                     | <b>-0.4184</b> | <b>0.2288</b>    |
| <b>Protein-bound Asp+Asn</b> | <b>Free Glu</b>                                     | <b>-0.5520</b> | <b>0.0980</b>    |
| Protein-bound Asp+Asn        | Free Gly                                            | -0.2117        | 0.5571           |
| Protein-bound Asp+Asn        | Free Gly/Thr                                        | -0.0283        | 0.9382           |
| Protein-bound Asp+Asn        | Free Gly+Ile                                        | -0.2067        | 0.5666           |
| Protein-bound Asp+Asn        | Free His                                            | -0.3092        | 0.3846           |
| Protein-bound Asp+Asn        | Free Ile                                            | 0.0441         | 0.9037           |
| Protein-bound Asp+Asn        | Free Ile/Thr                                        | 0.0783         | 0.8297           |
| Protein-bound Asp+Asn        | Free Leu                                            | -0.3203        | 0.3668           |
| <b>Protein-bound Asp+Asn</b> | <b>Free Lys</b>                                     | <b>-0.4925</b> | <b>0.1481</b>    |
| Protein-bound Asp+Asn        | Free Lys/(Met+Thr+Ile)                              | -0.0321        | 0.9298           |
| Protein-bound Asp+Asn        | Free Lys/Asp                                        | 0.1760         | 0.6266           |
| Protein-bound Asp+Asn        | Free Lys/Thr                                        | -0.0012        | 0.9973           |
| Protein-bound Asp+Asn        | Free Lys+Met+Thr+Ile                                | 0.1166         | 0.7483           |
| <b>Protein-bound Asp+Asn</b> | <b>Free Met</b>                                     | <b>-0.5790</b> | <b>0.0794</b>    |
| Protein-bound Asp+Asn        | Free Met/(Thr+Ile)                                  | -0.0987        | 0.7862           |
| Protein-bound Asp+Asn        | Free Met/Thr                                        | -0.0384        | 0.9161           |
| Protein-bound Asp+Asn        | Free Met+Thr+Ile                                    | 0.1345         | 0.7110           |
| Protein-bound Asp+Asn        | Free Phe                                            | -0.1694        | 0.6399           |
| <b>Protein-bound Asp+Asn</b> | <b>Free Pro</b>                                     | <b>-0.5653</b> | <b>0.0886</b>    |
| Protein-bound Asp+Asn        | Free Ser                                            | -0.1460        | 0.6873           |
| Protein-bound Asp+Asn        | Free Thr                                            | 0.1424         | 0.6948           |
| Protein-bound Asp+Asn        | Free Thr/(Gly+Ile)                                  | 0.1741         | 0.6305           |
| Protein-bound Asp+Asn        | Free Thr/Asp                                        | 0.3665         | 0.2976           |
| Protein-bound Asp+Asn        | Free Trp                                            | -0.0972        | 0.7893           |
| Protein-bound Asp+Asn        | Free Tyr                                            | -0.2239        | 0.5341           |
| Protein-bound Asp+Asn        | Free Val                                            | 0.1173         | 0.7469           |
| Protein-bound Asp+Asn        | HSDH activity with four effectors                   | -0.0087        | 0.9811           |
| Protein-bound Asp+Asn        | HSDH activity without effectors                     | 0.2567         | 0.4741           |
| Protein-bound Asp+Asn        | <i>LKR-SDHI</i>                                     | -0.1349        | 0.7102           |
| Protein-bound Asp+Asn        | Lys-sensitive AK activity                           | 0.3361         | 0.3423           |
| Protein-bound Asp+Asn        | Lys-sensitive AK activity/Thr-sensitive AK activity | -0.2811        | 0.4314           |
| <b>Protein-bound Asp+Asn</b> | <b>Protein-bound Ala</b>                            | <b>0.9562</b>  | <b>&lt;.0001</b> |
| Protein-bound Asp+Asn        | Protein-bound Arg                                   | 0.2167         | 0.5475           |
| <b>Protein-bound Asp+Asn</b> | <b>Protein-bound Asn+Asp+Ile+Lys+Thr</b>            | <b>0.9365</b>  | <b>&lt;.0001</b> |
| <b>Protein-bound Asp+Asn</b> | <b>Protein-bound Gly</b>                            | <b>0.9194</b>  | <b>0.0002</b>    |
| Protein-bound Asp+Asn        | Protein-bound His                                   | 0.2903         | 0.4158           |
| Protein-bound Asp+Asn        | Protein-bound Ile                                   | 0.2888         | 0.4183           |
| <b>Protein-bound Asp+Asn</b> | <b>Protein-bound Leu</b>                            | <b>0.5391</b>  | <b>0.1078</b>    |
| Protein-bound Asp+Asn        | Protein-bound Lys                                   | 0.1846         | 0.6096           |
| Protein-bound Asp+Asn        | Protein-bound Phe                                   | 0.1739         | 0.6308           |
| <b>Protein-bound Asp+Asn</b> | <b>Protein-bound Pro</b>                            | <b>0.8930</b>  | <b>0.0005</b>    |
| <b>Protein-bound Asp+Asn</b> | <b>Protein-bound Ser</b>                            | <b>0.9951</b>  | <b>&lt;.0001</b> |
| <b>Protein-bound Asp+Asn</b> | <b>Protein-bound Thr</b>                            | <b>0.8944</b>  | <b>0.0005</b>    |
| <b>Protein-bound Asp+Asn</b> | <b>Protein-bound Tyr</b>                            | <b>0.8135</b>  | <b>0.0042</b>    |
| <b>Protein-bound Asp+Asn</b> | <b>Protein-bound Val</b>                            | <b>0.4038</b>  | <b>0.2472</b>    |
| Protein-bound Asp+Asn        | <i>SAMS1</i>                                        | -0.2542        | 0.4784           |
| Protein-bound Asp+Asn        | <i>SAMS2</i>                                        | -0.0072        | 0.9842           |
| Protein-bound Asp+Asn        | <i>SAMS3</i>                                        | 0.3803         | 0.2784           |
| Protein-bound Asp+Asn        | <i>SAMS4</i>                                        | 0.3399         | 0.3366           |
| Protein-bound Asp+Asn        | <i>SAMSs</i>                                        | 0.2467         | 0.4920           |

|                              |                                               |                |                  |
|------------------------------|-----------------------------------------------|----------------|------------------|
| Protein-bound Asp+Asn        | <i>TD1</i>                                    | -0.0021        | 0.9953           |
| <b>Protein-bound Asp+Asn</b> | <b><i>TD1/BCAT1</i></b>                       | <b>-0.4464</b> | <b>0.1959</b>    |
| Protein-bound Asp+Asn        | <i>THA1</i>                                   | 0.0512         | 0.8882           |
| Protein-bound Asp+Asn        | <i>THA2</i>                                   | -0.0757        | 0.8353           |
| Protein-bound Asp+Asn        | <i>THAs</i>                                   | -0.0986        | 0.7865           |
| Protein-bound Asp+Asn        | <i>THAs+TD1</i>                               | -0.0121        | 0.9735           |
| <b>Protein-bound Asp+Asn</b> | <b>Thr-sensitive AK activity</b>              | <b>0.6451</b>  | <b>0.0440</b>    |
| <b>Protein-bound Asp+Asn</b> | <b>Total free AAs</b>                         | <b>-0.4291</b> | <b>0.2159</b>    |
| <b>Protein-bound Asp+Asn</b> | <b>Total protein-bound AAs</b>                | <b>0.9453</b>  | <b>&lt;.0001</b> |
| <b>Protein-bound Asp+Asn</b> | <b><i>TS1</i></b>                             | <b>0.4500</b>  | <b>0.1919</b>    |
| <b>Protein-bound Asp+Asn</b> | <b><i>TS1/(THAs+TD1)</i></b>                  | <b>0.5003</b>  | <b>0.1408</b>    |
| Protein-bound Asp+Asn        | <i>TS1/TD1</i>                                | 0.3423         | 0.3329           |
| Protein-bound Asp+Asn        | <i>TS1/THAs</i>                               | 0.2283         | 0.5257           |
| Protein-bound Glu+Gln        | <i>(AK-HSDHs+CGS1)/SAMSs</i>                  | -0.2372        | 0.5093           |
| <b>Protein-bound Glu+Gln</b> | <b><i>(AK-HSDHs+TS1)/(THAs+TD1)</i></b>       | <b>0.4010</b>  | <b>0.2508</b>    |
| <b>Protein-bound Glu+Gln</b> | <b><i>(AK-HSDHs+TS1+TD1)/BCAT1</i></b>        | <b>-0.5537</b> | <b>0.0968</b>    |
| Protein-bound Glu+Gln        | <i>(AKs+AK-HSDHs)/AK-HSDHs</i>                | -0.3189        | 0.3691           |
| Protein-bound Glu+Gln        | <i>(AKs+AK-HSDHs+CGS1)/SAMSs</i>              | -0.3454        | 0.3283           |
| Protein-bound Glu+Gln        | <i>(AKs+AK-HSDHs+DHDPSs)/LKR-SDHI</i>         | -0.1871        | 0.6047           |
| Protein-bound Glu+Gln        | <i>(AKs+AK-HSDHs+TS1)/(THAs+TD1)</i>          | 0.1287         | 0.7231           |
| <b>Protein-bound Glu+Gln</b> | <b><i>(AKs+AK-HSDHs+TS1+TD1)/BCAT1</i></b>    | <b>-0.5771</b> | <b>0.0807</b>    |
| Protein-bound Glu+Gln        | <i>(AKs+DHDPSs)/LKR-SDHI</i>                  | -0.2720        | 0.4472           |
| Protein-bound Glu+Gln        | AK activity with four effectors               | -0.1811        | 0.6166           |
| Protein-bound Glu+Gln        | AK activity without effectors                 | 0.0850         | 0.8154           |
| Protein-bound Glu+Gln        | AK activity/HSDH activity with four effectors | -0.1351        | 0.7097           |
| Protein-bound Glu+Gln        | AK activity/HSDH activity without effectors   | -0.2616        | 0.4653           |
| Protein-bound Glu+Gln        | <i>AK1</i>                                    | -0.1334        | 0.7134           |
| <b>Protein-bound Glu+Gln</b> | <b><i>AK1+AK2</i></b>                         | <b>-0.4270</b> | <b>0.2184</b>    |
| Protein-bound Glu+Gln        | <i>AK1+AK3</i>                                | -0.1085        | 0.7655           |
| Protein-bound Glu+Gln        | <i>AK2</i>                                    | -0.3853        | 0.2715           |
| Protein-bound Glu+Gln        | <i>AK2+AK3</i>                                | -0.3713        | 0.2908           |
| Protein-bound Glu+Gln        | <i>AK3</i>                                    | 0.0152         | 0.9668           |
| <b>Protein-bound Glu+Gln</b> | <b><i>AK-HSDHI</i></b>                        | <b>0.5112</b>  | <b>0.1310</b>    |
| Protein-bound Glu+Gln        | <i>AK-HSDH2</i>                               | -0.3604        | 0.3062           |
| Protein-bound Glu+Gln        | <i>AK-HSDHs</i>                               | 0.0502         | 0.8904           |
| Protein-bound Glu+Gln        | <i>AK-HSDHs+CGS1</i>                          | -0.1219        | 0.7372           |
| Protein-bound Glu+Gln        | <i>AK-HSDHs+TS1</i>                           | 0.1259         | 0.7289           |
| Protein-bound Glu+Gln        | <i>AK-HSDHs+TS1+TD1</i>                       | 0.0969         | 0.7901           |
| Protein-bound Glu+Gln        | <i>AK-HSDHs+TS1+THAs</i>                      | 0.1218         | 0.7375           |
| <b>Protein-bound Glu+Gln</b> | <b><i>AKs</i></b>                             | <b>-0.4175</b> | <b>0.2300</b>    |
| Protein-bound Glu+Gln        | <i>AKs/AK-HSDHs</i>                           | -0.3189        | 0.3691           |
| <b>Protein-bound Glu+Gln</b> | <b><i>AKs+AK-HSDHs</i></b>                    | <b>-0.4211</b> | <b>0.2256</b>    |
| <b>Protein-bound Glu+Gln</b> | <b><i>AKs+AK-HSDHs+CGS1</i></b>               | <b>-0.4615</b> | <b>0.1794</b>    |
| <b>Protein-bound Glu+Gln</b> | <b><i>AKs+AK-HSDHs+DHDPSs</i></b>             | <b>-0.4245</b> | <b>0.2214</b>    |
| Protein-bound Glu+Gln        | <i>AKs+AK-HSDHs+TS1</i>                       | -0.2622        | 0.4642           |
| Protein-bound Glu+Gln        | <i>AKs+AK-HSDHs+TS1+TD1</i>                   | -0.2676        | 0.4547           |
| Protein-bound Glu+Gln        | <i>AKs+AK-HSDHs+TS1+THAs</i>                  | -0.2639        | 0.4613           |
| <b>Protein-bound Glu+Gln</b> | <b><i>AKs+DHDPSs</i></b>                      | <b>-0.4240</b> | <b>0.2220</b>    |
| <b>Protein-bound Glu+Gln</b> | <b><i>BCAT1</i></b>                           | <b>0.6497</b>  | <b>0.0420</b>    |
| Protein-bound Glu+Gln        | Biosynthetic genes analyzed                   | -0.2904        | 0.4156           |
| Protein-bound Glu+Gln        | Catabolic genes analyzed                      | -0.0174        | 0.9619           |
| Protein-bound Glu+Gln        | <i>CGS1</i>                                   | -0.2841        | 0.4262           |
| Protein-bound Glu+Gln        | <i>CGS1/SAMSs</i>                             | -0.2466        | 0.4922           |
| <b>Protein-bound Glu+Gln</b> | <b><i>CGS1/TS1</i></b>                        | <b>-0.5136</b> | <b>0.1289</b>    |
| Protein-bound Glu+Gln        | <i>DHDPS1</i>                                 | -0.1146        | 0.7525           |
| Protein-bound Glu+Gln        | <i>DHDPS2</i>                                 | -0.1910        | 0.5971           |
| Protein-bound Glu+Gln        | <i>DHDPSs</i>                                 | -0.2001        | 0.5794           |

|                              |                                                     |                |                  |
|------------------------------|-----------------------------------------------------|----------------|------------------|
| Protein-bound Glu+Gln        | <i>DHDPSs/AK-HSDHs</i>                              | -0.1381        | 0.7037           |
| Protein-bound Glu+Gln        | <i>DHDPSs/LKR-SDHI</i>                              | -0.0237        | 0.9482           |
| Protein-bound Glu+Gln        | Free (Lys+Met+Thr+Ile)/Asp                          | 0.2251         | 0.5319           |
| Protein-bound Glu+Gln        | Free Ala                                            | -0.1981        | 0.5832           |
| <b>Protein-bound Glu+Gln</b> | <b>Free Arg</b>                                     | <b>-0.6555</b> | <b>0.0396</b>    |
| <b>Protein-bound Glu+Gln</b> | <b>Free Asn</b>                                     | <b>-0.5797</b> | <b>0.0790</b>    |
| <b>Protein-bound Glu+Gln</b> | <b>Free Asn+Asp</b>                                 | <b>-0.4816</b> | <b>0.1587</b>    |
| Protein-bound Glu+Gln        | Free Asn+Asp+Lys+Met+Thr+Ile                        | -0.2347        | 0.5140           |
| Protein-bound Glu+Gln        | Free Asn+Asp+Lys+Thr+Ile                            | -0.2296        | 0.5234           |
| <b>Protein-bound Glu+Gln</b> | <b>Free Asp</b>                                     | <b>-0.4610</b> | <b>0.1799</b>    |
| Protein-bound Glu+Gln        | Free Asp+Lys+Met+Thr+Ile                            | -0.1989        | 0.5816           |
| Protein-bound Glu+Gln        | Free Cys                                            | -0.2828        | 0.4286           |
| <b>Protein-bound Glu+Gln</b> | <b>Free Gln</b>                                     | <b>-0.5644</b> | <b>0.0892</b>    |
| <b>Protein-bound Glu+Gln</b> | <b>Free Glu</b>                                     | <b>-0.5912</b> | <b>0.0718</b>    |
| Protein-bound Glu+Gln        | Free Gly                                            | -0.2428        | 0.4990           |
| Protein-bound Glu+Gln        | Free Gly/Thr                                        | 0.2050         | 0.5699           |
| Protein-bound Glu+Gln        | Free Gly+Ile                                        | -0.2487        | 0.4885           |
| <b>Protein-bound Glu+Gln</b> | <b>Free His</b>                                     | <b>-0.5754</b> | <b>0.0818</b>    |
| Protein-bound Glu+Gln        | Free Ile                                            | -0.1314        | 0.7175           |
| Protein-bound Glu+Gln        | Free Ile/Thr                                        | 0.2893         | 0.4175           |
| <b>Protein-bound Glu+Gln</b> | <b>Free Leu</b>                                     | <b>-0.4655</b> | <b>0.1752</b>    |
| <b>Protein-bound Glu+Gln</b> | <b>Free Lys</b>                                     | <b>-0.6479</b> | <b>0.0428</b>    |
| Protein-bound Glu+Gln        | Free Lys/(Met+Thr+Ile)                              | 0.1472         | 0.6849           |
| Protein-bound Glu+Gln        | Free Lys/Asp                                        | -0.0464        | 0.8987           |
| Protein-bound Glu+Gln        | Free Lys/Thr                                        | 0.1912         | 0.5968           |
| Protein-bound Glu+Gln        | Free Lys+Met+Thr+Ile                                | -0.0155        | 0.9661           |
| <b>Protein-bound Glu+Gln</b> | <b>Free Met</b>                                     | <b>-0.5489</b> | <b>0.1003</b>    |
| Protein-bound Glu+Gln        | Free Met/(Thr+Ile)                                  | 0.1446         | 0.6902           |
| Protein-bound Glu+Gln        | Free Met/Thr                                        | 0.2206         | 0.5402           |
| Protein-bound Glu+Gln        | Free Met+Thr+Ile                                    | 0.0083         | 0.9819           |
| Protein-bound Glu+Gln        | Free Phe                                            | -0.3252        | 0.3592           |
| <b>Protein-bound Glu+Gln</b> | <b>Free Pro</b>                                     | <b>-0.6484</b> | <b>0.0426</b>    |
| Protein-bound Glu+Gln        | Free Ser                                            | -0.0856        | 0.8141           |
| Protein-bound Glu+Gln        | Free Thr                                            | 0.0183         | 0.9600           |
| Protein-bound Glu+Gln        | Free Thr/(Gly+Ile)                                  | 0.0555         | 0.8791           |
| Protein-bound Glu+Gln        | Free Thr/Asp                                        | 0.2269         | 0.5284           |
| Protein-bound Glu+Gln        | Free Trp                                            | -0.2428        | 0.4992           |
| Protein-bound Glu+Gln        | Free Tyr                                            | -0.3426        | 0.3326           |
| Protein-bound Glu+Gln        | Free Val                                            | -0.1089        | 0.7645           |
| Protein-bound Glu+Gln        | HSDH activity with four effectors                   | -0.2312        | 0.5205           |
| Protein-bound Glu+Gln        | HSDH activity without effectors                     | 0.1316         | 0.7171           |
| Protein-bound Glu+Gln        | <i>LKR-SDHI</i>                                     | 0.0939         | 0.7965           |
| Protein-bound Glu+Gln        | Lys-sensitive AK activity                           | 0.1060         | 0.7708           |
| Protein-bound Glu+Gln        | Lys-sensitive AK activity/Thr-sensitive AK activity | -0.3837        | 0.2737           |
| <b>Protein-bound Glu+Gln</b> | <b>Protein-bound Ala</b>                            | <b>0.9207</b>  | <b>0.0002</b>    |
| <b>Protein-bound Glu+Gln</b> | <b>Protein-bound Arg</b>                            | <b>0.5445</b>  | <b>0.1037</b>    |
| <b>Protein-bound Glu+Gln</b> | <b>Protein-bound Asn+Asp+Ile+Lys+Thr</b>            | <b>0.9514</b>  | <b>&lt;.0001</b> |
| <b>Protein-bound Glu+Gln</b> | <b>Protein-bound Asp+Asn</b>                        | <b>0.8812</b>  | <b>0.0008</b>    |
| <b>Protein-bound Glu+Gln</b> | <b>Protein-bound Gly</b>                            | <b>0.8264</b>  | <b>0.0032</b>    |
| Protein-bound Glu+Gln        | Protein-bound His                                   | 0.2950         | 0.4080           |
| <b>Protein-bound Glu+Gln</b> | <b>Protein-bound Ile</b>                            | <b>0.5017</b>  | <b>0.1395</b>    |
| Protein-bound Glu+Gln        | Protein-bound Leu                                   | 0.3613         | 0.3050           |
| <b>Protein-bound Glu+Gln</b> | <b>Protein-bound Lys</b>                            | <b>0.4029</b>  | <b>0.2483</b>    |
| Protein-bound Glu+Gln        | Protein-bound Phe                                   | 0.3540         | 0.3156           |
| <b>Protein-bound Glu+Gln</b> | <b>Protein-bound Pro</b>                            | <b>0.9550</b>  | <b>&lt;.0001</b> |
| <b>Protein-bound Glu+Gln</b> | <b>Protein-bound Ser</b>                            | <b>0.8758</b>  | <b>0.0009</b>    |
| <b>Protein-bound Glu+Gln</b> | <b>Protein-bound Thr</b>                            | <b>0.9316</b>  | <b>&lt;.0001</b> |
| <b>Protein-bound Glu+Gln</b> | <b>Protein-bound Tyr</b>                            | <b>0.6497</b>  | <b>0.0420</b>    |

|                              |                                               |                |                  |
|------------------------------|-----------------------------------------------|----------------|------------------|
| Protein-bound Glu+Gln        | Protein-bound Val                             | 0.3071         | 0.3880           |
| Protein-bound Glu+Gln        | <i>SAMS1</i>                                  | -0.2575        | 0.4726           |
| Protein-bound Glu+Gln        | <i>SAMS2</i>                                  | -0.1428        | 0.6939           |
| Protein-bound Glu+Gln        | <i>SAMS3</i>                                  | 0.0887         | 0.8075           |
| Protein-bound Glu+Gln        | <i>SAMS4</i>                                  | 0.0499         | 0.8911           |
| Protein-bound Glu+Gln        | <i>SAMSs</i>                                  | -0.0202        | 0.9559           |
| Protein-bound Glu+Gln        | <i>TD1</i>                                    | -0.2091        | 0.5620           |
| <b>Protein-bound Glu+Gln</b> | <b><i>TD1/BCAT1</i></b>                       | <b>-0.5687</b> | <b>0.0863</b>    |
| <b>Protein-bound Glu+Gln</b> | <b><i>THA1</i></b>                            | <b>0.4209</b>  | <b>0.2258</b>    |
| Protein-bound Glu+Gln        | <i>THA2</i>                                   | -0.2756        | 0.4408           |
| Protein-bound Glu+Gln        | <i>THAs</i>                                   | -0.2755        | 0.4410           |
| Protein-bound Glu+Gln        | <i>THAs+TD1</i>                               | -0.2452        | 0.4947           |
| <b>Protein-bound Glu+Gln</b> | <b>Thr-sensitive AK activity</b>              | <b>0.6391</b>  | <b>0.0466</b>    |
| <b>Protein-bound Glu+Gln</b> | <b>Total free AAs</b>                         | <b>-0.5362</b> | <b>0.1101</b>    |
| <b>Protein-bound Glu+Gln</b> | <b>Total protein-bound AAs</b>                | <b>0.9787</b>  | <b>&lt;.0001</b> |
| Protein-bound Glu+Gln        | <i>TS1</i>                                    | 0.1431         | 0.6933           |
| <b>Protein-bound Glu+Gln</b> | <b><i>TS1/(THAs+TD1)</i></b>                  | <b>0.5142</b>  | <b>0.1284</b>    |
| Protein-bound Glu+Gln        | <i>TS1/TD1</i>                                | 0.3351         | 0.3439           |
| Protein-bound Glu+Gln        | <i>TS1/THAs</i>                               | 0.1108         | 0.7606           |
| Protein-bound Gly            | <i>(AK-HSDHs+CGS1)/SAMSs</i>                  | -0.3192        | 0.3687           |
| Protein-bound Gly            | <i>(AK-HSDHs+TS1)/(THAs+TD1)</i>              | 0.3434         | 0.3312           |
| Protein-bound Gly            | <i>(AK-HSDHs+TS1+TD1)/BCAT1</i>               | -0.3255        | 0.3587           |
| Protein-bound Gly            | <i>(AKs+AK-HSDHs)/AK-HSDHs</i>                | -0.2565        | 0.4744           |
| Protein-bound Gly            | <i>(AKs+AK-HSDHs+CGS1)/SAMSs</i>              | -0.1780        | 0.6228           |
| Protein-bound Gly            | <i>(AKs+AK-HSDHs+DHDPSs)/LKR-SDHI</i>         | 0.0922         | 0.8001           |
| Protein-bound Gly            | <i>(AKs+AK-HSDHs+TS1)/(THAs+TD1)</i>          | 0.1887         | 0.6015           |
| Protein-bound Gly            | <i>(AKs+AK-HSDHs+TS1+TD1)/BCAT1</i>           | -0.3420        | 0.3333           |
| Protein-bound Gly            | <i>(AKs+DHDPSs)/LKR-SDHI</i>                  | 0.0279         | 0.9391           |
| Protein-bound Gly            | AK activity with four effectors               | 0.1867         | 0.6055           |
| Protein-bound Gly            | AK activity without effectors                 | 0.3939         | 0.2600           |
| Protein-bound Gly            | AK activity/HSDH activity with four effectors | 0.1263         | 0.7282           |
| Protein-bound Gly            | AK activity/HSDH activity without effectors   | -0.0624        | 0.8639           |
| Protein-bound Gly            | <i>AK1</i>                                    | -0.0721        | 0.8431           |
| Protein-bound Gly            | <i>AK1+AK2</i>                                | -0.0616        | 0.8658           |
| Protein-bound Gly            | <i>AK1+AK3</i>                                | -0.0828        | 0.8201           |
| Protein-bound Gly            | <i>AK2</i>                                    | -0.0455        | 0.9007           |
| Protein-bound Gly            | <i>AK2+AK3</i>                                | -0.0483        | 0.8946           |
| Protein-bound Gly            | <i>AK3</i>                                    | -0.0325        | 0.9289           |
| <b>Protein-bound Gly</b>     | <b><i>AK-HSDHI</i></b>                        | <b>0.6040</b>  | <b>0.0644</b>    |
| Protein-bound Gly            | <i>AK-HSDH2</i>                               | -0.1486        | 0.6820           |
| Protein-bound Gly            | <i>AK-HSDHs</i>                               | 0.2415         | 0.5014           |
| Protein-bound Gly            | <i>AK-HSDHs+CGS1</i>                          | 0.0909         | 0.8027           |
| <b>Protein-bound Gly</b>     | <b><i>AK-HSDHs+TS1</i></b>                    | <b>0.4076</b>  | <b>0.2423</b>    |
| Protein-bound Gly            | <i>AK-HSDHs+TS1+TD1</i>                       | 0.3841         | 0.2731           |
| <b>Protein-bound Gly</b>     | <b><i>AK-HSDHs+TS1+THAs</i></b>               | <b>0.4054</b>  | <b>0.2452</b>    |
| Protein-bound Gly            | <i>AKs</i>                                    | -0.0668        | 0.8544           |
| Protein-bound Gly            | <i>AKs/AK-HSDHs</i>                           | -0.2565        | 0.4744           |
| Protein-bound Gly            | <i>AKs+AK-HSDHs</i>                           | -0.0059        | 0.9870           |
| Protein-bound Gly            | <i>AKs+AK-HSDHs+CGS1</i>                      | -0.0245        | 0.9465           |
| Protein-bound Gly            | <i>AKs+AK-HSDHs+DHDPSs</i>                    | -0.0003        | 0.9994           |
| Protein-bound Gly            | <i>AKs+AK-HSDHs+TS1</i>                       | 0.1971         | 0.5853           |
| Protein-bound Gly            | <i>AKs+AK-HSDHs+TS1+TD1</i>                   | 0.1948         | 0.5897           |
| Protein-bound Gly            | <i>AKs+AK-HSDHs+TS1+THAs</i>                  | 0.1949         | 0.5895           |
| Protein-bound Gly            | <i>AKs+DHDPSs</i>                             | -0.0615        | 0.8660           |
| <b>Protein-bound Gly</b>     | <b><i>BCAT1</i></b>                           | <b>0.5063</b>  | <b>0.1353</b>    |
| Protein-bound Gly            | Biosynthetic genes analyzed                   | 0.1674         | 0.6440           |
| Protein-bound Gly            | Catabolic genes analyzed                      | 0.2093         | 0.5617           |

|                          |                                                     |                |                  |
|--------------------------|-----------------------------------------------------|----------------|------------------|
| Protein-bound Gly        | <i>CGSI</i>                                         | -0.0855        | 0.8143           |
| <b>Protein-bound Gly</b> | <b><i>CGSI/SAMSs</i></b>                            | <b>-0.4095</b> | <b>0.2399</b>    |
| <b>Protein-bound Gly</b> | <b><i>CGSI/TSI</i></b>                              | <b>-0.6599</b> | <b>0.0379</b>    |
| Protein-bound Gly        | <i>DHDPS1</i>                                       | 0.1144         | 0.7530           |
| Protein-bound Gly        | <i>DHDPS2</i>                                       | 0.0673         | 0.8534           |
| Protein-bound Gly        | <i>DHDPSs</i>                                       | 0.1226         | 0.7357           |
| Protein-bound Gly        | <i>DHDPSs/AK-HSDHs</i>                              | -0.2819        | 0.4300           |
| Protein-bound Gly        | <i>DHDPSs/LKR-SDHI</i>                              | 0.1697         | 0.6392           |
| <b>Protein-bound Gly</b> | <b>Free (Lys+Met+Thr+Ile)/Asp</b>                   | <b>0.5014</b>  | <b>0.1398</b>    |
| Protein-bound Gly        | Free Ala                                            | -0.0877        | 0.8095           |
| <b>Protein-bound Gly</b> | <b>Free Arg</b>                                     | <b>-0.4151</b> | <b>0.2330</b>    |
| Protein-bound Gly        | Free Asn                                            | -0.3413        | 0.3345           |
| <b>Protein-bound Gly</b> | <b>Free Asn+Asp</b>                                 | <b>-0.4121</b> | <b>0.2366</b>    |
| Protein-bound Gly        | Free Asn+Asp+Lys+Met+Thr+Ile                        | 0.0943         | 0.7955           |
| Protein-bound Gly        | Free Asn+Asp+Lys+Thr+Ile                            | 0.0991         | 0.7853           |
| <b>Protein-bound Gly</b> | <b>Free Asp</b>                                     | <b>-0.4189</b> | <b>0.2283</b>    |
| Protein-bound Gly        | Free Asp+Lys+Met+Thr+Ile                            | 0.1231         | 0.7347           |
| Protein-bound Gly        | Free Cys                                            | 0.1261         | 0.7285           |
| Protein-bound Gly        | Free Gln                                            | -0.3469        | 0.3261           |
| <b>Protein-bound Gly</b> | <b>Free Glu</b>                                     | <b>-0.4697</b> | <b>0.1708</b>    |
| Protein-bound Gly        | Free Gly                                            | -0.0720        | 0.8432           |
| Protein-bound Gly        | Free Gly/Thr                                        | -0.1159        | 0.7499           |
| Protein-bound Gly        | Free Gly+Ile                                        | -0.0623        | 0.8642           |
| Protein-bound Gly        | Free His                                            | -0.3132        | 0.3783           |
| Protein-bound Gly        | Free Ile                                            | 0.1415         | 0.6966           |
| Protein-bound Gly        | Free Ile/Thr                                        | -0.0943        | 0.7956           |
| Protein-bound Gly        | Free Leu                                            | -0.2664        | 0.4569           |
| <b>Protein-bound Gly</b> | <b>Free Lys</b>                                     | <b>-0.4220</b> | <b>0.2245</b>    |
| Protein-bound Gly        | Free Lys/(Met+Thr+Ile)                              | -0.1742        | 0.6303           |
| Protein-bound Gly        | Free Lys/Asp                                        | 0.1809         | 0.6170           |
| Protein-bound Gly        | Free Lys/Thr                                        | -0.1537        | 0.6716           |
| Protein-bound Gly        | Free Lys+Met+Thr+Ile                                | 0.3070         | 0.3883           |
| <b>Protein-bound Gly</b> | <b>Free Met</b>                                     | <b>-0.5764</b> | <b>0.0812</b>    |
| Protein-bound Gly        | Free Met/(Thr+Ile)                                  | -0.1977        | 0.5840           |
| Protein-bound Gly        | Free Met/Thr                                        | -0.1633        | 0.6521           |
| Protein-bound Gly        | Free Met+Thr+Ile                                    | 0.3220         | 0.3642           |
| Protein-bound Gly        | Free Phe                                            | -0.1608        | 0.6571           |
| <b>Protein-bound Gly</b> | <b>Free Pro</b>                                     | <b>-0.4684</b> | <b>0.1721</b>    |
| Protein-bound Gly        | Free Ser                                            | -0.0973        | 0.7891           |
| Protein-bound Gly        | Free Thr                                            | 0.3267         | 0.3569           |
| Protein-bound Gly        | Free Thr/(Gly+Ile)                                  | 0.3017         | 0.3968           |
| <b>Protein-bound Gly</b> | <b>Free Thr/Asp</b>                                 | <b>0.4983</b>  | <b>0.1427</b>    |
| Protein-bound Gly        | Free Trp                                            | -0.0720        | 0.8432           |
| Protein-bound Gly        | Free Tyr                                            | -0.2585        | 0.4708           |
| Protein-bound Gly        | Free Val                                            | 0.0028         | 0.9938           |
| Protein-bound Gly        | HSDH activity with four effectors                   | -0.0185        | 0.9595           |
| Protein-bound Gly        | HSDH activity without effectors                     | 0.2637         | 0.4617           |
| Protein-bound Gly        | <i>LKR-SDHI</i>                                     | 0.0361         | 0.9211           |
| Protein-bound Gly        | Lys-sensitive AK activity                           | 0.3418         | 0.3338           |
| Protein-bound Gly        | Lys-sensitive AK activity/Thr-sensitive AK activity | -0.3211        | 0.3656           |
| <b>Protein-bound Gly</b> | <b>Protein-bound Ala</b>                            | <b>0.9551</b>  | <b>&lt;.0001</b> |
| Protein-bound Gly        | Protein-bound Arg                                   | 0.1615         | 0.6558           |
| Protein-bound Gly        | <i>SAMS1</i>                                        | -0.2467        | 0.4920           |
| Protein-bound Gly        | <i>SAMS2</i>                                        | 0.0973         | 0.7892           |
| Protein-bound Gly        | <i>SAMS3</i>                                        | 0.3361         | 0.3424           |
| Protein-bound Gly        | <i>SAMS4</i>                                        | 0.2578         | 0.4720           |
| Protein-bound Gly        | <i>SAMSs</i>                                        | 0.2049         | 0.5701           |
| Protein-bound Gly        | <i>TD1</i>                                          | 0.0519         | 0.8868           |

|                          |                                                      |                |               |
|--------------------------|------------------------------------------------------|----------------|---------------|
| Protein-bound Gly        | <i>TD1/BCAT1</i>                                     | -0.3303        | 0.3513        |
| Protein-bound Gly        | <i>THA1</i>                                          | 0.2086         | 0.5630        |
| Protein-bound Gly        | <i>THA2</i>                                          | -0.0922        | 0.7999        |
| Protein-bound Gly        | <i>THAs</i>                                          | -0.1008        | 0.7817        |
| Protein-bound Gly        | <i>THAs+TD1</i>                                      | 0.0401         | 0.9124        |
| <b>Protein-bound Gly</b> | <b>Thr-sensitive AK activity</b>                     | <b>0.4585</b>  | <b>0.1826</b> |
| Protein-bound Gly        | Total free AAs                                       | -0.3043        | 0.3926        |
| <b>Protein-bound Gly</b> | <b><i>TS1</i></b>                                    | <b>0.4272</b>  | <b>0.2182</b> |
| Protein-bound Gly        | <i>TS1/(THAs+TD1)</i>                                | 0.3752         | 0.2854        |
| Protein-bound Gly        | <i>TS1/TD1</i>                                       | 0.2072         | 0.5657        |
| Protein-bound Gly        | <i>TS1/THAs</i>                                      | 0.2945         | 0.4088        |
| Protein-bound His        | <i>(AK-HSDHs+CGS1)/SAMSs</i>                         | 0.0178         | 0.9610        |
| Protein-bound His        | <i>(AK-HSDHs+TS1)/(THAs+TD1)</i>                     | 0.0956         | 0.7929        |
| <b>Protein-bound His</b> | <b><i>(AK-HSDHs+TS1+TD1)/BCAT1</i></b>               | <b>-0.6193</b> | <b>0.0562</b> |
| Protein-bound His        | <i>(AKs+AK-HSDHs)/AK-HSDHs</i>                       | 0.3731         | 0.2882        |
| Protein-bound His        | <i>(AKs+AK-HSDHs+CGS1)/SAMSs</i>                     | 0.2662         | 0.4572        |
| Protein-bound His        | <i>(AKs+AK-HSDHs+DHDPSs)/LKR-SDHI</i>                | 0.1458         | 0.6877        |
| Protein-bound His        | <i>(AKs+AK-HSDHs+TS1)/(THAs+TD1)</i>                 | 0.3283         | 0.3544        |
| <b>Protein-bound His</b> | <b><i>(AKs+AK-HSDHs+TS1+TD1)/BCAT1</i></b>           | <b>-0.5980</b> | <b>0.0678</b> |
| Protein-bound His        | <i>(AKs+DHDPSs)/LKR-SDHI</i>                         | 0.2614         | 0.4656        |
| Protein-bound His        | AK activity with four effectors                      | 0.1676         | 0.6435        |
| Protein-bound His        | AK activity without effectors                        | 0.1769         | 0.6249        |
| <b>Protein-bound His</b> | <b>AK activity/HSDH activity with four effectors</b> | <b>0.6200</b>  | <b>0.0559</b> |
| <b>Protein-bound His</b> | <b>AK activity/HSDH activity without effectors</b>   | <b>0.6975</b>  | <b>0.0249</b> |
| Protein-bound His        | <i>AK1</i>                                           | -0.3238        | 0.3614        |
| Protein-bound His        | <i>AK1+AK2</i>                                       | 0.2297         | 0.5231        |
| Protein-bound His        | <i>AK1+AK3</i>                                       | -0.0487        | 0.8937        |
| Protein-bound His        | <i>AK2</i>                                           | 0.2888         | 0.4183        |
| Protein-bound His        | <i>AK2+AK3</i>                                       | 0.3351         | 0.3440        |
| Protein-bound His        | <i>AK3</i>                                           | 0.3141         | 0.3768        |
| Protein-bound His        | <i>AK-HSDH1</i>                                      | -0.3185        | 0.3698        |
| Protein-bound His        | <i>AK-HSDH2</i>                                      | -0.2034        | 0.5730        |
| Protein-bound His        | <i>AK-HSDHs</i>                                      | -0.3160        | 0.3738        |
| Protein-bound His        | <i>AK-HSDHs+CGS1</i>                                 | -0.2931        | 0.4112        |
| Protein-bound His        | <i>AK-HSDHs+TS1</i>                                  | -0.3319        | 0.3488        |
| Protein-bound His        | <i>AK-HSDHs+TS1+TD1</i>                              | -0.3422        | 0.3331        |
| Protein-bound His        | <i>AK-HSDHs+TS1+THAs</i>                             | -0.3322        | 0.3483        |
| Protein-bound His        | <i>AKs</i>                                           | 0.2826         | 0.4289        |
| Protein-bound His        | <i>AKs/AK-HSDHs</i>                                  | 0.3731         | 0.2882        |
| Protein-bound His        | <i>AKs+AK-HSDHs</i>                                  | 0.2092         | 0.5619        |
| Protein-bound His        | <i>AKs+AK-HSDHs+CGS1</i>                             | 0.1504         | 0.6784        |
| Protein-bound His        | <i>AKs+AK-HSDHs+DHDPSs</i>                           | 0.1890         | 0.6010        |
| Protein-bound His        | <i>AKs+AK-HSDHs+TS1</i>                              | 0.0247         | 0.9460        |
| Protein-bound His        | <i>AKs+AK-HSDHs+TS1+TD1</i>                          | 0.0031         | 0.9933        |
| Protein-bound His        | <i>AKs+AK-HSDHs+TS1+THAs</i>                         | 0.0261         | 0.9429        |
| Protein-bound His        | <i>AKs+DHDPSs</i>                                    | 0.2623         | 0.4641        |
| <b>Protein-bound His</b> | <b><i>BCAT1</i></b>                                  | <b>0.4756</b>  | <b>0.1648</b> |
| Protein-bound His        | Biosynthetic genes analyzed                          | -0.0264        | 0.9423        |
| Protein-bound His        | Catabolic genes analyzed                             | -0.2817        | 0.4304        |
| Protein-bound His        | <i>CGS1</i>                                          | -0.2075        | 0.5651        |
| Protein-bound His        | <i>CGS1/SAMSs</i>                                    | 0.1536         | 0.6718        |
| Protein-bound His        | <i>CGS1/TS1</i>                                      | 0.2912         | 0.4143        |
| <b>Protein-bound His</b> | <b><i>DHDPS1</i></b>                                 | <b>-0.6120</b> | <b>0.0600</b> |
| Protein-bound His        | <i>DHDPS2</i>                                        | -0.1811        | 0.6166        |
| <b>Protein-bound His</b> | <b><i>DHDPSs</i></b>                                 | <b>-0.4872</b> | <b>0.1532</b> |
| Protein-bound His        | <i>DHDPSs/AK-HSDHs</i>                               | 0.1947         | 0.5899        |
| Protein-bound His        | <i>DHDPSs/LKR-SDHI</i>                               | -0.2652        | 0.4589        |

|                          |                                                     |                |               |
|--------------------------|-----------------------------------------------------|----------------|---------------|
| Protein-bound His        | Free (Lys+Met+Thr+Ile)/Asp                          | 0.1151         | 0.7516        |
| Protein-bound His        | Free Ala                                            | -0.3320        | 0.3487        |
| <b>Protein-bound His</b> | <b>Free Arg</b>                                     | <b>-0.6498</b> | <b>0.0420</b> |
| <b>Protein-bound His</b> | <b>Free Asn</b>                                     | <b>-0.4860</b> | <b>0.1544</b> |
| Protein-bound His        | Free Asn+Asp                                        | -0.3605        | 0.3062        |
| Protein-bound His        | Free Asn+Asp+Lys+Met+Thr+Ile                        | -0.2050        | 0.5699        |
| Protein-bound His        | Free Asn+Asp+Lys+Thr+Ile                            | -0.2025        | 0.5747        |
| Protein-bound His        | Free Asp                                            | -0.3363        | 0.3420        |
| Protein-bound His        | Free Asp+Lys+Met+Thr+Ile                            | -0.1806        | 0.6177        |
| Protein-bound His        | Free Cys                                            | -0.2998        | 0.4000        |
| <b>Protein-bound His</b> | <b>Free Gln</b>                                     | <b>-0.4888</b> | <b>0.1517</b> |
| Protein-bound His        | Free Glu                                            | -0.0785        | 0.8294        |
| <b>Protein-bound His</b> | <b>Free Gly</b>                                     | <b>-0.4339</b> | <b>0.2102</b> |
| Protein-bound His        | Free Gly/Thr                                        | -0.2116        | 0.5573        |
| <b>Protein-bound His</b> | <b>Free Gly+Ile</b>                                 | <b>-0.4624</b> | <b>0.1784</b> |
| <b>Protein-bound His</b> | <b>Free His</b>                                     | <b>-0.4534</b> | <b>0.1882</b> |
| <b>Protein-bound His</b> | <b>Free Ile</b>                                     | <b>-0.5204</b> | <b>0.1230</b> |
| Protein-bound His        | Free Ile/Thr                                        | -0.1041        | 0.7747        |
| <b>Protein-bound His</b> | <b>Free Leu</b>                                     | <b>-0.5795</b> | <b>0.0791</b> |
| <b>Protein-bound His</b> | <b>Free Lys</b>                                     | <b>-0.5493</b> | <b>0.1001</b> |
| Protein-bound His        | Free Lys/(Met+Thr+Ile)                              | -0.1849        | 0.6091        |
| Protein-bound His        | Free Lys/Asp                                        | -0.2456        | 0.4940        |
| Protein-bound His        | Free Lys/Thr                                        | -0.1605        | 0.6579        |
| Protein-bound His        | Free Lys+Met+Thr+Ile                                | -0.0448        | 0.9023        |
| Protein-bound His        | Free Met                                            | -0.3610        | 0.3055        |
| Protein-bound His        | Free Met/(Thr+Ile)                                  | -0.2534        | 0.4799        |
| Protein-bound His        | Free Met/Thr                                        | -0.1232        | 0.7346        |
| Protein-bound His        | Free Met+Thr+Ile                                    | -0.0245        | 0.9463        |
| <b>Protein-bound His</b> | <b>Free Phe</b>                                     | <b>-0.5017</b> | <b>0.1396</b> |
| Protein-bound His        | Free Pro                                            | -0.3877        | 0.2683        |
| <b>Protein-bound His</b> | <b>Free Ser</b>                                     | <b>-0.4325</b> | <b>0.2119</b> |
| Protein-bound His        | Free Thr                                            | -0.0109        | 0.9762        |
| Protein-bound His        | Free Thr/(Gly+Ile)                                  | 0.0627         | 0.8634        |
| Protein-bound His        | Free Thr/Asp                                        | 0.1220         | 0.7371        |
| <b>Protein-bound His</b> | <b>Free Trp</b>                                     | <b>-0.5908</b> | <b>0.0721</b> |
| <b>Protein-bound His</b> | <b>Free Tyr</b>                                     | <b>-0.4951</b> | <b>0.1457</b> |
| Protein-bound His        | Free Val                                            | -0.2115        | 0.5575        |
| <b>Protein-bound His</b> | <b>HSDH activity with four effectors</b>            | <b>-0.6942</b> | <b>0.0259</b> |
| <b>Protein-bound His</b> | <b>HSDH activity without effectors</b>              | <b>-0.6987</b> | <b>0.0246</b> |
| Protein-bound His        | <i>LKR-SDHI</i>                                     | 0.0183         | 0.9601        |
| Protein-bound His        | Lys-sensitive AK activity                           | 0.3729         | 0.2885        |
| Protein-bound His        | Lys-sensitive AK activity/Thr-sensitive AK activity | -0.0050        | 0.9890        |
| Protein-bound His        | Protein-bound Ala                                   | 0.2058         | 0.5684        |
| <b>Protein-bound His</b> | <b>Protein-bound Arg</b>                            | <b>0.6340</b>  | <b>0.0490</b> |
| Protein-bound His        | Protein-bound Gly                                   | 0.1082         | 0.7661        |
| Protein-bound His        | <i>SAMS1</i>                                        | -0.2504        | 0.4853        |
| <b>Protein-bound His</b> | <b><i>SAMS2</i></b>                                 | <b>-0.4113</b> | <b>0.2376</b> |
| Protein-bound His        | <i>SAMS3</i>                                        | -0.2105        | 0.5594        |
| Protein-bound His        | <i>SAMS4</i>                                        | -0.1902        | 0.5986        |
| Protein-bound His        | <i>SAMSs</i>                                        | -0.2828        | 0.4286        |
| Protein-bound His        | <i>TD1</i>                                          | -0.3384        | 0.3389        |
| <b>Protein-bound His</b> | <b><i>TD1/BCAT1</i></b>                             | <b>-0.6394</b> | <b>0.0465</b> |
| Protein-bound His        | <i>THA1</i>                                         | 0.0371         | 0.9190        |
| Protein-bound His        | <i>THA2</i>                                         | -0.0485        | 0.8942        |
| Protein-bound His        | <i>THAs</i>                                         | 0.0095         | 0.9792        |
| Protein-bound His        | <i>THAs+TD1</i>                                     | -0.3388        | 0.3383        |
| Protein-bound His        | Thr-sensitive AK activity                           | 0.2737         | 0.4442        |
| Protein-bound His        | Total free AAs                                      | -0.3695        | 0.2933        |

|                          |                                               |                |               |
|--------------------------|-----------------------------------------------|----------------|---------------|
| Protein-bound His        | <i>TS1</i>                                    | -0.2958        | 0.4067        |
| Protein-bound His        | <i>TS1/(THAs+TD1)</i>                         | 0.1787         | 0.6214        |
| Protein-bound His        | <i>TS1/TD1</i>                                | 0.1936         | 0.5921        |
| <b>Protein-bound His</b> | <b><i>TS1/THAs</i></b>                        | <b>-0.4934</b> | <b>0.1473</b> |
| Protein-bound Ile        | <i>(AK-HSDHs+CGS1)/SAMs</i>                   | 0.1945         | 0.5903        |
| Protein-bound Ile        | <i>(AK-HSDHs+TS1)/(THAs+TD1)</i>              | 0.3037         | 0.3936        |
| Protein-bound Ile        | <i>(AK-HSDHs+TS1+TD1)/BCAT1</i>               | -0.2918        | 0.4133        |
| Protein-bound Ile        | <i>(AKs+AK-HSDHs)/AK-HSDHs</i>                | 0.3042         | 0.3929        |
| Protein-bound Ile        | <i>(AKs+AK-HSDHs+CGS1)/SAMs</i>               | 0.2930         | 0.4113        |
| Protein-bound Ile        | <i>(AKs+AK-HSDHs+DHDPSs)/LKR-SDHI</i>         | -0.1838        | 0.6112        |
| <b>Protein-bound Ile</b> | <b><i>(AKs+AK-HSDHs+TS1)/(THAs+TD1)</i></b>   | <b>0.4278</b>  | <b>0.2175</b> |
| Protein-bound Ile        | <i>(AKs+AK-HSDHs+TS1+TD1)/BCAT1</i>           | -0.2811        | 0.4314        |
| Protein-bound Ile        | <i>(AKs+DHDPSs)/LKR-SDHI</i>                  | -0.0584        | 0.8728        |
| Protein-bound Ile        | AK activity with four effectors               | -0.0559        | 0.8780        |
| Protein-bound Ile        | AK activity without effectors                 | 0.0616         | 0.8657        |
| Protein-bound Ile        | AK activity/HSDH activity with four effectors | 0.2823         | 0.4293        |
| Protein-bound Ile        | AK activity/HSDH activity without effectors   | 0.2116         | 0.5573        |
| Protein-bound Ile        | <i>AK1</i>                                    | -0.0902        | 0.8043        |
| Protein-bound Ile        | <i>AK1+AK2</i>                                | 0.1752         | 0.6283        |
| Protein-bound Ile        | <i>AK1+AK3</i>                                | -0.3812        | 0.2771        |
| Protein-bound Ile        | <i>AK2</i>                                    | 0.1867         | 0.6054        |
| Protein-bound Ile        | <i>AK2+AK3</i>                                | 0.1165         | 0.7485        |
| Protein-bound Ile        | <i>AK3</i>                                    | -0.3758        | 0.2845        |
| Protein-bound Ile        | <i>AK-HSDH1</i>                               | -0.2269        | 0.5285        |
| <b>Protein-bound Ile</b> | <b><i>AK-HSDH2</i></b>                        | <b>-0.6624</b> | <b>0.0369</b> |
| <b>Protein-bound Ile</b> | <b><i>AK-HSDHs</i></b>                        | <b>-0.5592</b> | <b>0.0928</b> |
| <b>Protein-bound Ile</b> | <b><i>AK-HSDHs+CGS1</i></b>                   | <b>-0.6000</b> | <b>0.0667</b> |
| <b>Protein-bound Ile</b> | <b><i>AK-HSDHs+TS1</i></b>                    | <b>-0.5023</b> | <b>0.1390</b> |
| <b>Protein-bound Ile</b> | <b><i>AK-HSDHs+TS1+TD1</i></b>                | <b>-0.5366</b> | <b>0.1098</b> |
| <b>Protein-bound Ile</b> | <b><i>AK-HSDHs+TS1+THAs</i></b>               | <b>-0.5008</b> | <b>0.1403</b> |
| Protein-bound Ile        | <i>AKs</i>                                    | 0.1034         | 0.7762        |
| Protein-bound Ile        | <i>AKs/AK-HSDHs</i>                           | 0.3042         | 0.3929        |
| Protein-bound Ile        | <i>AKs+AK-HSDHs</i>                           | -0.0414        | 0.9096        |
| Protein-bound Ile        | <i>AKs+AK-HSDHs+CGS1</i>                      | -0.1575        | 0.6640        |
| Protein-bound Ile        | <i>AKs+AK-HSDHs+DHDPSs</i>                    | -0.0645        | 0.8595        |
| Protein-bound Ile        | <i>AKs+AK-HSDHs+TS1</i>                       | -0.2249        | 0.5322        |
| Protein-bound Ile        | <i>AKs+AK-HSDHs+TS1+TD1</i>                   | -0.2634        | 0.4621        |
| Protein-bound Ile        | <i>AKs+AK-HSDHs+TS1+THAs</i>                  | -0.2226        | 0.5364        |
| Protein-bound Ile        | <i>AKs+DHDPSs</i>                             | 0.0783         | 0.8297        |
| <b>Protein-bound Ile</b> | <b><i>BCAT1</i></b>                           | <b>0.6979</b>  | <b>0.0248</b> |
| Protein-bound Ile        | Biosynthetic genes analyzed                   | -0.3096        | 0.3839        |
| <b>Protein-bound Ile</b> | <b>Catabolic genes analyzed</b>               | <b>-0.6489</b> | <b>0.0424</b> |
| <b>Protein-bound Ile</b> | <b><i>CGS1</i></b>                            | <b>-0.5245</b> | <b>0.1196</b> |
| Protein-bound Ile        | <i>CGS1/SAMs</i>                              | 0.3597         | 0.3073        |
| Protein-bound Ile        | <i>CGS1/TS1</i>                               | 0.0363         | 0.9206        |
| Protein-bound Ile        | <i>DHDPS1</i>                                 | -0.3920        | 0.2626        |
| <b>Protein-bound Ile</b> | <b><i>DHDPS2</i></b>                          | <b>-0.5553</b> | <b>0.0956</b> |
| <b>Protein-bound Ile</b> | <b><i>DHDPSs</i></b>                          | <b>-0.6264</b> | <b>0.0526</b> |
| Protein-bound Ile        | <i>DHDPSs/AK-HSDHs</i>                        | 0.3433         | 0.3314        |
| <b>Protein-bound Ile</b> | <b><i>DHDPSs/LKR-SDHI</i></b>                 | <b>-0.5395</b> | <b>0.1075</b> |
| Protein-bound Ile        | Free (Lys+Met+Thr+Ile)/Asp                    | 0.3108         | 0.3821        |
| <b>Protein-bound Ile</b> | <b>Free Ala</b>                               | <b>-0.6710</b> | <b>0.0337</b> |
| <b>Protein-bound Ile</b> | <b>Free Arg</b>                               | <b>-0.8495</b> | <b>0.0019</b> |
| <b>Protein-bound Ile</b> | <b>Free Asn</b>                               | <b>-0.8236</b> | <b>0.0034</b> |
| <b>Protein-bound Ile</b> | <b>Free Asn+Asp</b>                           | <b>-0.6483</b> | <b>0.0426</b> |
| Protein-bound Ile        | Free Asn+Asp+Lys+Met+Thr+Ile                  | -0.2360        | 0.5115        |
| Protein-bound Ile        | Free Asn+Asp+Lys+Thr+Ile                      | -0.2308        | 0.5211        |



|                          |                                                     |                |               |
|--------------------------|-----------------------------------------------------|----------------|---------------|
| <b>Protein-bound Ile</b> | <b>Free Asp</b>                                     | <b>-0.6148</b> | <b>0.0586</b> |
| Protein-bound Ile        | Free Asp+Lys+Met+Thr+Ile                            | -0.1868        | 0.6053        |
| Protein-bound Ile        | Free Cys                                            | -0.1677        | 0.6433        |
| <b>Protein-bound Ile</b> | <b>Free Gln</b>                                     | <b>-0.8540</b> | <b>0.0017</b> |
| <b>Protein-bound Ile</b> | <b>Free Glu</b>                                     | <b>-0.4637</b> | <b>0.1770</b> |
| <b>Protein-bound Ile</b> | <b>Free Gly</b>                                     | <b>-0.6445</b> | <b>0.0442</b> |
| Protein-bound Ile        | Free Gly/Thr                                        | -0.2186        | 0.5440        |
| <b>Protein-bound Ile</b> | <b>Free Gly+Ile</b>                                 | <b>-0.6668</b> | <b>0.0352</b> |
| <b>Protein-bound Ile</b> | <b>Free His</b>                                     | <b>-0.8519</b> | <b>0.0018</b> |
| <b>Protein-bound Ile</b> | <b>Free Ile</b>                                     | <b>-0.4568</b> | <b>0.1844</b> |
| Protein-bound Ile        | Free Ile/Thr                                        | -0.0734        | 0.8404        |
| <b>Protein-bound Ile</b> | <b>Free Leu</b>                                     | <b>-0.7143</b> | <b>0.0203</b> |
| <b>Protein-bound Ile</b> | <b>Free Lys</b>                                     | <b>-0.6869</b> | <b>0.0282</b> |
| Protein-bound Ile        | Free Lys/(Met+Thr+Ile)                              | -0.1844        | 0.6101        |
| Protein-bound Ile        | Free Lys/Asp                                        | 0.0804         | 0.8253        |
| Protein-bound Ile        | Free Lys/Thr                                        | -0.1471        | 0.6850        |
| Protein-bound Ile        | Free Lys+Met+Thr+Ile                                | 0.0681         | 0.8518        |
| Protein-bound Ile        | Free Met                                            | -0.3988        | 0.2536        |
| Protein-bound Ile        | Free Met/(Thr+Ile)                                  | -0.1189        | 0.7435        |
| Protein-bound Ile        | Free Met/Thr                                        | -0.0519        | 0.8869        |
| Protein-bound Ile        | Free Met+Thr+Ile                                    | 0.0932         | 0.7979        |
| <b>Protein-bound Ile</b> | <b>Free Phe</b>                                     | <b>-0.7490</b> | <b>0.0127</b> |
| <b>Protein-bound Ile</b> | <b>Free Pro</b>                                     | <b>-0.7175</b> | <b>0.0195</b> |
| <b>Protein-bound Ile</b> | <b>Free Ser</b>                                     | <b>-0.6438</b> | <b>0.0445</b> |
| Protein-bound Ile        | Free Thr                                            | 0.1055         | 0.7719        |
| Protein-bound Ile        | Free Thr/(Gly+Ile)                                  | 0.1864         | 0.6061        |
| Protein-bound Ile        | Free Thr/Asp                                        | 0.3097         | 0.3838        |
| <b>Protein-bound Ile</b> | <b>Free Trp</b>                                     | <b>-0.7280</b> | <b>0.0170</b> |
| <b>Protein-bound Ile</b> | <b>Free Tyr</b>                                     | <b>-0.6170</b> | <b>0.0574</b> |
| <b>Protein-bound Ile</b> | <b>Free Val</b>                                     | <b>-0.6546</b> | <b>0.0400</b> |
| <b>Protein-bound Ile</b> | <b>HSDH activity with four effectors</b>            | <b>-0.6014</b> | <b>0.0659</b> |
| Protein-bound Ile        | HSDH activity without effectors                     | -0.3172        | 0.3719        |
| Protein-bound Ile        | <i>LKR-SDHI</i>                                     | 0.2847         | 0.4253        |
| <b>Protein-bound Ile</b> | <b>Lys-sensitive AK activity</b>                    | <b>0.4805</b>  | <b>0.1598</b> |
| Protein-bound Ile        | Lys-sensitive AK activity/Thr-sensitive AK activity | -0.0928        | 0.7988        |
| Protein-bound Ile        | Protein-bound Ala                                   | 0.2682         | 0.4538        |
| <b>Protein-bound Ile</b> | <b>Protein-bound Arg</b>                            | <b>0.9018</b>  | <b>0.0004</b> |
| Protein-bound Ile        | Protein-bound Gly                                   | 0.2953         | 0.4075        |
| <b>Protein-bound Ile</b> | <b>Protein-bound His</b>                            | <b>0.5885</b>  | <b>0.0735</b> |
| <b>Protein-bound Ile</b> | <b>SAMS1</b>                                        | <b>-0.6498</b> | <b>0.0420</b> |
| <b>Protein-bound Ile</b> | <b>SAMS2</b>                                        | <b>-0.6003</b> | <b>0.0665</b> |
| <b>Protein-bound Ile</b> | <b>SAMS3</b>                                        | <b>-0.4073</b> | <b>0.2427</b> |
| <b>Protein-bound Ile</b> | <b>SAMS4</b>                                        | <b>-0.6319</b> | <b>0.0500</b> |
| <b>Protein-bound Ile</b> | <b>SAMSs</b>                                        | <b>-0.6491</b> | <b>0.0423</b> |
| <b>Protein-bound Ile</b> | <b>TD1</b>                                          | <b>-0.7182</b> | <b>0.0193</b> |
| Protein-bound Ile        | <i>TD1/BCAT1</i>                                    | -0.3489        | 0.3231        |
| <b>Protein-bound Ile</b> | <b>THA1</b>                                         | <b>0.5449</b>  | <b>0.1033</b> |
| Protein-bound Ile        | <i>THA2</i>                                         | -0.0888        | 0.8072        |
| Protein-bound Ile        | <i>THAs</i>                                         | -0.0200        | 0.9563        |
| <b>Protein-bound Ile</b> | <b>THAs+TD1</b>                                     | <b>-0.7005</b> | <b>0.0241</b> |
| Protein-bound Ile        | Thr-sensitive AK activity                           | 0.1533         | 0.6725        |
| <b>Protein-bound Ile</b> | <b>Total free AAs</b>                               | <b>-0.7125</b> | <b>0.0208</b> |
| <b>Protein-bound Ile</b> | <b>TS1</b>                                          | <b>-0.4082</b> | <b>0.2416</b> |
| <b>Protein-bound Ile</b> | <b>TS1/(THAs+TD1)</b>                               | <b>0.5279</b>  | <b>0.1168</b> |
| Protein-bound Ile        | <i>TS1/TD1</i>                                      | 0.3829         | 0.2748        |
| <b>Protein-bound Ile</b> | <b>TS1/THAs</b>                                     | <b>-0.6397</b> | <b>0.0464</b> |
| Protein-bound Leu        | <i>(AK-HSDHs+CGS1)/SAMSs</i>                        | 0.0056         | 0.9878        |
| Protein-bound Leu        | <i>(AK-HSDHs+TS1)/(THAs+TD1)</i>                    | 0.1614         | 0.6560        |

|                          |                                                      |                |               |
|--------------------------|------------------------------------------------------|----------------|---------------|
| Protein-bound Leu        | <i>(AK-HSDHs+TS1+TD1)/BCAT1</i>                      | -0.2065        | 0.5671        |
| Protein-bound Leu        | <i>(AKs+AK-HSDHs)/AK-HSDHs</i>                       | -0.0202        | 0.9558        |
| Protein-bound Leu        | <i>(AKs+AK-HSDHs+CGS1)/SAMSs</i>                     | 0.1705         | 0.6376        |
| <b>Protein-bound Leu</b> | <b><i>(AKs+AK-HSDHs+DHDPSs)/LKR-SDHI</i></b>         | <b>0.5091</b>  | <b>0.1328</b> |
| Protein-bound Leu        | <i>(AKs+AK-HSDHs+TS1)/(THAs+TD1)</i>                 | 0.2871         | 0.4212        |
| Protein-bound Leu        | <i>(AKs+AK-HSDHs+TS1+TD1)/BCAT1</i>                  | -0.1977        | 0.5839        |
| <b>Protein-bound Leu</b> | <b><i>(AKs+DHDPSs)/LKR-SDHI</i></b>                  | <b>0.5234</b>  | <b>0.1205</b> |
| Protein-bound Leu        | AK activity with four effectors                      | 0.3597         | 0.3072        |
| Protein-bound Leu        | AK activity without effectors                        | 0.3611         | 0.3053        |
| <b>Protein-bound Leu</b> | <b>AK activity/HSDH activity with four effectors</b> | <b>0.4277</b>  | <b>0.2176</b> |
| <b>Protein-bound Leu</b> | <b>AK activity/HSDH activity without effectors</b>   | <b>0.4719</b>  | <b>0.1685</b> |
| <b>Protein-bound Leu</b> | <b>AK1</b>                                           | <b>-0.4601</b> | <b>0.1809</b> |
| Protein-bound Leu        | <i>AK1+AK2</i>                                       | 0.3005         | 0.3989        |
| Protein-bound Leu        | <i>AK1+AK3</i>                                       | -0.1524        | 0.6743        |
| Protein-bound Leu        | <i>AK2</i>                                           | 0.3853         | 0.2715        |
| <b>Protein-bound Leu</b> | <b><i>AK2+AK3</i></b>                                | <b>0.4336</b>  | <b>0.2106</b> |
| Protein-bound Leu        | <i>AK3</i>                                           | 0.3350         | 0.3440        |
| Protein-bound Leu        | <i>AK-HSDH1</i>                                      | 0.2052         | 0.5695        |
| Protein-bound Leu        | <i>AK-HSDH2</i>                                      | 0.3045         | 0.3923        |
| Protein-bound Leu        | <i>AK-HSDHs</i>                                      | 0.3116         | 0.3808        |
| Protein-bound Leu        | <i>AK-HSDHs+CGS1</i>                                 | 0.2780         | 0.4368        |
| Protein-bound Leu        | <i>AK-HSDHs+TS1</i>                                  | 0.3521         | 0.3184        |
| Protein-bound Leu        | <i>AK-HSDHs+TS1+TD1</i>                              | 0.3450         | 0.3289        |
| Protein-bound Leu        | <i>AK-HSDHs+TS1+THAs</i>                             | 0.3480         | 0.3244        |
| Protein-bound Leu        | <i>AKs</i>                                           | 0.3551         | 0.3140        |
| Protein-bound Leu        | <i>AKs/AK-HSDHs</i>                                  | -0.0202        | 0.9558        |
| <b>Protein-bound Leu</b> | <b><i>AKs+AK-HSDHs</i></b>                           | <b>0.4504</b>  | <b>0.1915</b> |
| <b>Protein-bound Leu</b> | <b><i>AKs+AK-HSDHs+CGS1</i></b>                      | <b>0.4704</b>  | <b>0.1701</b> |
| <b>Protein-bound Leu</b> | <b><i>AKs+AK-HSDHs+DHDPSs</i></b>                    | <b>0.4523</b>  | <b>0.1894</b> |
| <b>Protein-bound Leu</b> | <b><i>AKs+AK-HSDHs+TS1</i></b>                       | <b>0.5057</b>  | <b>0.1359</b> |
| <b>Protein-bound Leu</b> | <b><i>AKs+AK-HSDHs+TS1+TD1</i></b>                   | <b>0.5039</b>  | <b>0.1375</b> |
| <b>Protein-bound Leu</b> | <b><i>AKs+AK-HSDHs+TS1+THAs</i></b>                  | <b>0.5018</b>  | <b>0.1395</b> |
| Protein-bound Leu        | <i>AKs+DHDPSs</i>                                    | 0.3598         | 0.3071        |
| Protein-bound Leu        | <i>BCAT1</i>                                         | 0.2006         | 0.5783        |
| <b>Protein-bound Leu</b> | <b>Biosynthetic genes analyzed</b>                   | <b>0.4946</b>  | <b>0.1461</b> |
| Protein-bound Leu        | Catabolic genes analyzed                             | 0.2167         | 0.5477        |
| Protein-bound Leu        | <i>CGS1</i>                                          | 0.1967         | 0.5860        |
| Protein-bound Leu        | <i>CGS1/SAMSs</i>                                    | -0.1949        | 0.5895        |
| Protein-bound Leu        | <i>CGS1/TS1</i>                                      | -0.1135        | 0.7550        |
| Protein-bound Leu        | <i>DHDPS1</i>                                        | -0.2404        | 0.5035        |
| Protein-bound Leu        | <i>DHDPS2</i>                                        | 0.3701         | 0.2925        |
| Protein-bound Leu        | <i>DHDPSs</i>                                        | 0.1142         | 0.7534        |
| Protein-bound Leu        | <i>DHDPSs/AK-HSDHs</i>                               | -0.3573        | 0.3107        |
| Protein-bound Leu        | <i>DHDPSs/LKR-SDHI</i>                               | 0.3015         | 0.3972        |
| Protein-bound Leu        | Free (Lys+Met+Thr+Ile)/Asp                           | 0.0353         | 0.9229        |
| Protein-bound Leu        | Free Ala                                             | 0.1756         | 0.6275        |
| Protein-bound Leu        | Free Arg                                             | -0.2810        | 0.4316        |
| Protein-bound Leu        | Free Asn                                             | -0.1142        | 0.7534        |
| Protein-bound Leu        | Free Asn+Asp                                         | -0.1804        | 0.6180        |
| Protein-bound Leu        | Free Asn+Asp+Lys+Met+Thr+Ile                         | -0.1208        | 0.7396        |
| Protein-bound Leu        | Free Asn+Asp+Lys+Thr+Ile                             | -0.1209        | 0.7393        |
| Protein-bound Leu        | Free Asp                                             | -0.1933        | 0.5927        |
| Protein-bound Leu        | Free Asp+Lys+Met+Thr+Ile                             | -0.1184        | 0.7445        |
| Protein-bound Leu        | Free Cys                                             | -0.1839        | 0.6111        |
| Protein-bound Leu        | Free Gln                                             | -0.1563        | 0.6663        |
| Protein-bound Leu        | Free Glu                                             | -0.0765        | 0.8336        |
| Protein-bound Leu        | Free Gly                                             | -0.0754        | 0.8360        |

|                          |                                                            |                |               |
|--------------------------|------------------------------------------------------------|----------------|---------------|
| Protein-bound Leu        | Free Gly/Thr                                               | -0.1529        | 0.6731        |
| Protein-bound Leu        | Free Gly+Ile                                               | -0.0818        | 0.8222        |
| Protein-bound Leu        | Free His                                                   | -0.0514        | 0.8879        |
| Protein-bound Leu        | Free Ile                                                   | -0.1142        | 0.7533        |
| Protein-bound Leu        | Free Ile/Thr                                               | -0.0222        | 0.9514        |
| Protein-bound Leu        | Free Leu                                                   | -0.0731        | 0.8410        |
| Protein-bound Leu        | Free Lys                                                   | -0.1412        | 0.6972        |
| Protein-bound Leu        | Free Lys/(Met+Thr+Ile)                                     | -0.0247        | 0.9461        |
| Protein-bound Leu        | Free Lys/Asp                                               | 0.0521         | 0.8863        |
| Protein-bound Leu        | Free Lys/Thr                                               | -0.0438        | 0.9043        |
| Protein-bound Leu        | Free Lys+Met+Thr+Ile                                       | -0.0431        | 0.9059        |
| <b>Protein-bound Leu</b> | <b>Free Met</b>                                            | <b>-0.4093</b> | <b>0.2402</b> |
| Protein-bound Leu        | Free Met/(Thr+Ile)                                         | -0.1661        | 0.6465        |
| Protein-bound Leu        | Free Met/Thr                                               | -0.1076        | 0.7674        |
| Protein-bound Leu        | Free Met+Thr+Ile                                           | -0.0379        | 0.9173        |
| Protein-bound Leu        | Free Phe                                                   | 0.0854         | 0.8145        |
| Protein-bound Leu        | Free Pro                                                   | -0.1220        | 0.7371        |
| Protein-bound Leu        | Free Ser                                                   | -0.0779        | 0.8307        |
| Protein-bound Leu        | Free Thr                                                   | -0.0351        | 0.9233        |
| Protein-bound Leu        | Free Thr/(Gly+Ile)                                         | -0.0946        | 0.7949        |
| Protein-bound Leu        | Free Thr/Asp                                               | 0.0299         | 0.9346        |
| Protein-bound Leu        | Free Trp                                                   | 0.0050         | 0.9891        |
| Protein-bound Leu        | Free Tyr                                                   | -0.0519        | 0.8868        |
| Protein-bound Leu        | Free Val                                                   | 0.2932         | 0.4110        |
| Protein-bound Leu        | HSDH activity with four effectors                          | -0.0814        | 0.8232        |
| Protein-bound Leu        | HSDH activity without effectors                            | -0.2047        | 0.5705        |
| Protein-bound Leu        | <i>LKR-SDHI</i>                                            | -0.1825        | 0.6137        |
| Protein-bound Leu        | Lys-sensitive AK activity                                  | 0.3209         | 0.3659        |
| <b>Protein-bound Leu</b> | <b>Lys-sensitive AK activity/Thr-sensitive AK activity</b> | <b>-0.4645</b> | <b>0.1762</b> |
| <b>Protein-bound Leu</b> | <b>Protein-bound Ala</b>                                   | <b>0.5199</b>  | <b>0.1235</b> |
| Protein-bound Leu        | Protein-bound Arg                                          | 0.1315         | 0.7172        |
| <b>Protein-bound Leu</b> | <b>Protein-bound Gly</b>                                   | <b>0.5412</b>  | <b>0.1062</b> |
| <b>Protein-bound Leu</b> | <b>Protein-bound His</b>                                   | <b>0.5387</b>  | <b>0.1081</b> |
| Protein-bound Leu        | Protein-bound Ile                                          | 0.2440         | 0.4970        |
| Protein-bound Leu        | <i>SAMS1</i>                                               | 0.0074         | 0.9839        |
| Protein-bound Leu        | <i>SAMS2</i>                                               | 0.0298         | 0.9348        |
| Protein-bound Leu        | <i>SAMS3</i>                                               | 0.2026         | 0.5745        |
| Protein-bound Leu        | <i>SAMS4</i>                                               | 0.3530         | 0.3170        |
| Protein-bound Leu        | <i>SAMSs</i>                                               | 0.2138         | 0.5531        |
| Protein-bound Leu        | <i>TD1</i>                                                 | 0.2075         | 0.5652        |
| Protein-bound Leu        | <i>TD1/BCAT1</i>                                           | -0.2037        | 0.5725        |
| Protein-bound Leu        | <i>THA1</i>                                                | 0.0093         | 0.9797        |
| Protein-bound Leu        | <i>THA2</i>                                                | -0.0838        | 0.8180        |
| Protein-bound Leu        | <i>THAs</i>                                                | -0.0788        | 0.8286        |
| Protein-bound Leu        | <i>THAs+TD1</i>                                            | 0.1786         | 0.6214        |
| <b>Protein-bound Leu</b> | <b>Thr-sensitive AK activity</b>                           | <b>0.5374</b>  | <b>0.1092</b> |
| Protein-bound Leu        | Total free AAs                                             | -0.1152        | 0.7513        |
| Protein-bound Leu        | <i>TS1</i>                                                 | 0.3230         | 0.3627        |
| Protein-bound Leu        | <i>TS1/(THAs+TD1)</i>                                      | 0.0852         | 0.8150        |
| Protein-bound Leu        | <i>TS1/TD1</i>                                             | 0.0646         | 0.8593        |
| Protein-bound Leu        | <i>TS1/THAs</i>                                            | 0.1059         | 0.7709        |
| Protein-bound Lys        | <i>(AK-HSDHs+CGS1)/SAMSs</i>                               | 0.2355         | 0.5124        |
| Protein-bound Lys        | <i>(AK-HSDHs+TS1)/(THAs+TD1)</i>                           | 0.0834         | 0.8189        |
| Protein-bound Lys        | <i>(AK-HSDHs+TS1+TD1)/BCAT1</i>                            | -0.2800        | 0.4333        |
| Protein-bound Lys        | <i>(AKs+AK-HSDHs)/AK-HSDHs</i>                             | 0.1139         | 0.7540        |
| Protein-bound Lys        | <i>(AKs+AK-HSDHs+CGS1)/SAMSs</i>                           | 0.0756         | 0.8355        |
| Protein-bound Lys        | <i>(AKs+AK-HSDHs+DHDPs)/LKR-SDHI</i>                       | -0.2335        | 0.5162        |

|                          |                                               |                |               |
|--------------------------|-----------------------------------------------|----------------|---------------|
| Protein-bound Lys        | $(AKs+AK-HSDHs+TS1)/(THAs+TD1)$               | 0.0670         | 0.8540        |
| Protein-bound Lys        | $(AKs+AK-HSDHs+TS1+TD1)/BCAT1$                | -0.2742        | 0.4432        |
| Protein-bound Lys        | $(AKs+DHDPSs)/LKR-SDH1$                       | -0.1769        | 0.6248        |
| Protein-bound Lys        | AK activity with four effectors               | -0.3159        | 0.3739        |
| Protein-bound Lys        | AK activity without effectors                 | -0.2423        | 0.5000        |
| Protein-bound Lys        | AK activity/HSDH activity with four effectors | -0.0097        | 0.9788        |
| Protein-bound Lys        | AK activity/HSDH activity without effectors   | 0.1034         | 0.7761        |
| Protein-bound Lys        | <i>AK1</i>                                    | -0.3802        | 0.2785        |
| Protein-bound Lys        | <i>AK1+AK2</i>                                | -0.1296        | 0.7212        |
| Protein-bound Lys        | <i>AK1+AK3</i>                                | -0.2645        | 0.4602        |
| Protein-bound Lys        | <i>AK2</i>                                    | -0.0467        | 0.8980        |
| Protein-bound Lys        | <i>AK2+AK3</i>                                | -0.0261        | 0.9430        |
| Protein-bound Lys        | <i>AK3</i>                                    | 0.1174         | 0.7467        |
| Protein-bound Lys        | <i>AK-HSDH1</i>                               | -0.2667        | 0.4563        |
| Protein-bound Lys        | <i>AK-HSDH2</i>                               | -0.2985        | 0.4021        |
| Protein-bound Lys        | <i>AK-HSDHs</i>                               | -0.3458        | 0.3276        |
| Protein-bound Lys        | <i>AK-HSDHs+CGS1</i>                          | -0.3223        | 0.3637        |
| Protein-bound Lys        | <i>AK-HSDHs+TS1</i>                           | -0.2248        | 0.5324        |
| Protein-bound Lys        | <i>AK-HSDHs+TS1+TD1</i>                       | -0.2381        | 0.5077        |
| Protein-bound Lys        | <i>AK-HSDHs+TS1+THAs</i>                      | -0.2244        | 0.5332        |
| Protein-bound Lys        | <i>AKs</i>                                    | -0.1068        | 0.7691        |
| Protein-bound Lys        | <i>AKs/AK-HSDHs</i>                           | 0.1139         | 0.7540        |
| Protein-bound Lys        | <i>AKs+AK-HSDHs</i>                           | -0.2041        | 0.5717        |
| Protein-bound Lys        | <i>AKs+AK-HSDHs+CGS1</i>                      | -0.2444        | 0.4963        |
| Protein-bound Lys        | <i>AKs+AK-HSDHs+DHDPSs</i>                    | -0.2154        | 0.5501        |
| Protein-bound Lys        | <i>AKs+AK-HSDHs+TS1</i>                       | -0.2255        | 0.5310        |
| Protein-bound Lys        | <i>AKs+AK-HSDHs+TS1+TD1</i>                   | -0.2381        | 0.5077        |
| Protein-bound Lys        | <i>AKs+AK-HSDHs+TS1+THAs</i>                  | -0.2250        | 0.5321        |
| Protein-bound Lys        | <i>AKs+DHDPSs</i>                             | -0.1203        | 0.7407        |
| Protein-bound Lys        | <i>BCAT1</i>                                  | 0.2954         | 0.4073        |
| Protein-bound Lys        | Biosynthetic genes analyzed                   | -0.2523        | 0.4818        |
| <b>Protein-bound Lys</b> | <b>Catabolic genes analyzed</b>               | <b>-0.4535</b> | <b>0.1881</b> |
| Protein-bound Lys        | <i>CGS1</i>                                   | -0.2330        | 0.5170        |
| Protein-bound Lys        | <i>CGS1/SAMSs</i>                             | 0.3423         | 0.3329        |
| Protein-bound Lys        | <i>CGS1/TS1</i>                               | 0.0104         | 0.9773        |
| Protein-bound Lys        | <i>DHDPS1</i>                                 | -0.3399        | 0.3366        |
| Protein-bound Lys        | <i>DHDPS2</i>                                 | -0.1854        | 0.6081        |
| Protein-bound Lys        | <i>DHDPSs</i>                                 | -0.3487        | 0.3233        |
| Protein-bound Lys        | <i>DHDPSs/AK-HSDHs</i>                        | 0.2836         | 0.4272        |
| Protein-bound Lys        | <i>DHDPSs/LKR-SDH1</i>                        | -0.3168        | 0.3725        |
| Protein-bound Lys        | Free (Lys+Met+Thr+Ile)/Asp                    | -0.2356        | 0.5123        |
| Protein-bound Lys        | Free Ala                                      | -0.1381        | 0.7035        |
| <b>Protein-bound Lys</b> | <b>Free Arg</b>                               | <b>-0.5062</b> | <b>0.1355</b> |
| <b>Protein-bound Lys</b> | <b>Free Asn</b>                               | <b>-0.4084</b> | <b>0.2413</b> |
| Protein-bound Lys        | Free Asn+Asp                                  | -0.1987        | 0.5820        |
| Protein-bound Lys        | Free Asn+Asp+Lys+Met+Thr+Ile                  | -0.3662        | 0.2980        |
| Protein-bound Lys        | Free Asn+Asp+Lys+Thr+Ile                      | -0.3663        | 0.2978        |
| Protein-bound Lys        | Free Asp                                      | -0.1708        | 0.6371        |
| Protein-bound Lys        | Free Asp+Lys+Met+Thr+Ile                      | -0.3513        | 0.3196        |
| <b>Protein-bound Lys</b> | <b>Free Cys</b>                               | <b>-0.5541</b> | <b>0.0965</b> |
| <b>Protein-bound Lys</b> | <b>Free Gln</b>                               | <b>-0.4828</b> | <b>0.1575</b> |
| Protein-bound Lys        | Free Glu                                      | -0.0867        | 0.8117        |
| <b>Protein-bound Lys</b> | <b>Free Gly</b>                               | <b>-0.4479</b> | <b>0.1942</b> |
| Protein-bound Lys        | Free Gly/Thr                                  | 0.2239         | 0.5341        |
| <b>Protein-bound Lys</b> | <b>Free Gly+Ile</b>                           | <b>-0.4669</b> | <b>0.1737</b> |
| <b>Protein-bound Lys</b> | <b>Free His</b>                               | <b>-0.4054</b> | <b>0.2451</b> |
| Protein-bound Lys        | Free Ile                                      | -0.3727        | 0.2888        |

|                          |                                                     |                |               |
|--------------------------|-----------------------------------------------------|----------------|---------------|
| <b>Protein-bound Lys</b> | <b>Free Ile/Thr</b>                                 | <b>0.4413</b>  | <b>0.2017</b> |
| Protein-bound Lys        | Free Leu                                            | -0.2877        | 0.4203        |
| Protein-bound Lys        | Free Lys                                            | -0.3161        | 0.3735        |
| Protein-bound Lys        | Free Lys/(Met+Thr+Ile)                              | 0.3472         | 0.3256        |
| Protein-bound Lys        | Free Lys/Asp                                        | -0.2571        | 0.4734        |
| <b>Protein-bound Lys</b> | <b>Free Lys/Thr</b>                                 | <b>-0.4097</b> | <b>0.2396</b> |
| Protein-bound Lys        | Free Lys+Met+Thr+Ile                                | -0.2982        | 0.4026        |
| Protein-bound Lys        | Free Met                                            | 0.0142         | 0.9690        |
| Protein-bound Lys        | Free Met/(Thr+Ile)                                  | 0.3484         | 0.3239        |
| <b>Protein-bound Lys</b> | <b>Free Met/Thr</b>                                 | <b>0.4720</b>  | <b>0.1684</b> |
| Protein-bound Lys        | Free Met+Thr+Ile                                    | -0.2862        | 0.4227        |
| Protein-bound Lys        | Free Phe                                            | -0.2501        | 0.4859        |
| Protein-bound Lys        | Free Pro                                            | -0.3633        | 0.3022        |
| Protein-bound Lys        | Free Ser                                            | -0.3398        | 0.3367        |
| Protein-bound Lys        | Free Thr                                            | -0.2778        | 0.4372        |
| Protein-bound Lys        | Free Thr/(Gly+Ile)                                  | -0.2338        | 0.5156        |
| Protein-bound Lys        | Free Thr/Asp                                        | -0.2308        | 0.5211        |
| Protein-bound Lys        | Free Trp                                            | -0.3663        | 0.2979        |
| Protein-bound Lys        | Free Tyr                                            | -0.1900        | 0.5990        |
| Protein-bound Lys        | Free Val                                            | -0.0245        | 0.9465        |
| <b>Protein-bound Lys</b> | <b>HSDH activity with four effectors</b>            | <b>-0.5139</b> | <b>0.1287</b> |
| <b>Protein-bound Lys</b> | <b>HSDH activity without effectors</b>              | <b>-0.4427</b> | <b>0.2002</b> |
| Protein-bound Lys        | <i>LKR-SDHI</i>                                     | 0.2015         | 0.5767        |
| Protein-bound Lys        | Lys-sensitive AK activity                           | -0.0031        | 0.9932        |
| Protein-bound Lys        | Lys-sensitive AK activity/Thr-sensitive AK activity | -0.2158        | 0.5493        |
| Protein-bound Lys        | Protein-bound Ala                                   | 0.1426         | 0.6943        |
| <b>Protein-bound Lys</b> | <b>Protein-bound Arg</b>                            | <b>0.7513</b>  | <b>0.0122</b> |
| Protein-bound Lys        | Protein-bound Gly                                   | -0.0129        | 0.9718        |
| <b>Protein-bound Lys</b> | <b>Protein-bound His</b>                            | <b>0.6637</b>  | <b>0.0364</b> |
| <b>Protein-bound Lys</b> | <b>Protein-bound Ile</b>                            | <b>0.6489</b>  | <b>0.0424</b> |
| Protein-bound Lys        | Protein-bound Leu                                   | 0.2593         | 0.4694        |
| Protein-bound Lys        | <i>SAMS1</i>                                        | -0.0992        | 0.7852        |
| Protein-bound Lys        | <i>SAMS2</i>                                        | -0.2504        | 0.4853        |
| <b>Protein-bound Lys</b> | <b><i>SAMS3</i></b>                                 | <b>-0.4992</b> | <b>0.1418</b> |
| Protein-bound Lys        | <i>SAMS4</i>                                        | -0.3038        | 0.3935        |
| <b>Protein-bound Lys</b> | <b><i>SAMSs</i></b>                                 | <b>-0.4541</b> | <b>0.1874</b> |
| Protein-bound Lys        | <i>TD1</i>                                          | -0.2986        | 0.4020        |
| Protein-bound Lys        | <i>TD1/BCAT1</i>                                    | -0.3120        | 0.3801        |
| <b>Protein-bound Lys</b> | <b><i>THA1</i></b>                                  | <b>0.4294</b>  | <b>0.2156</b> |
| Protein-bound Lys        | <i>THA2</i>                                         | -0.1317        | 0.7168        |
| Protein-bound Lys        | <i>THAs</i>                                         | -0.0566        | 0.8767        |
| Protein-bound Lys        | <i>THAs+TD1</i>                                     | -0.3045        | 0.3923        |
| <b>Protein-bound Lys</b> | <b>Thr-sensitive AK activity</b>                    | <b>0.5312</b>  | <b>0.1141</b> |
| Protein-bound Lys        | Total free AAs                                      | -0.3798        | 0.2791        |
| Protein-bound Lys        | <i>TS1</i>                                          | -0.1392        | 0.7013        |
| Protein-bound Lys        | <i>TS1/(THAs+TD1)</i>                               | 0.2676         | 0.4548        |
| Protein-bound Lys        | <i>TS1/TD1</i>                                      | 0.1299         | 0.7206        |
| <b>Protein-bound Lys</b> | <b><i>TS1/THAs</i></b>                              | <b>-0.4640</b> | <b>0.1767</b> |
| Protein-bound Phe        | <i>(AK-HSDHs+CGS1)/SAMSs</i>                        | -0.2064        | 0.5673        |
| Protein-bound Phe        | <i>(AK-HSDHs+TS1)/(THAs+TD1)</i>                    | 0.2708         | 0.4492        |
| <b>Protein-bound Phe</b> | <b><i>(AK-HSDHs+TS1+TD1)/BCAT1</i></b>              | <b>-0.4551</b> | <b>0.1863</b> |
| Protein-bound Phe        | <i>(AKs+AK-HSDHs)/AK-HSDHs</i>                      | -0.1083        | 0.7658        |
| Protein-bound Phe        | <i>(AKs+AK-HSDHs+CGS1)/SAMSs</i>                    | -0.2451        | 0.4949        |
| Protein-bound Phe        | <i>(AKs+AK-HSDHs+DHDPSs)/LKR-SDHI</i>               | -0.0079        | 0.9826        |
| Protein-bound Phe        | <i>(AKs+AK-HSDHs+TS1)/(THAs+TD1)</i>                | 0.2083         | 0.5635        |
| <b>Protein-bound Phe</b> | <b><i>(AKs+AK-HSDHs+TS1+TD1)/BCAT1</i></b>          | <b>-0.4525</b> | <b>0.1891</b> |
| Protein-bound Phe        | <i>(AKs+DHDPSs)/LKR-SDHI</i>                        | 0.0036         | 0.9922        |

|                          |                                               |                |               |
|--------------------------|-----------------------------------------------|----------------|---------------|
| Protein-bound Phe        | AK activity with four effectors               | -0.1980        | 0.5835        |
| Protein-bound Phe        | AK activity without effectors                 | -0.2780        | 0.4367        |
| Protein-bound Phe        | AK activity/HSDH activity with four effectors | 0.1757         | 0.6273        |
| Protein-bound Phe        | AK activity/HSDH activity without effectors   | 0.1785         | 0.6216        |
| Protein-bound Phe        | <i>AK1</i>                                    | 0.1193         | 0.7427        |
| Protein-bound Phe        | <i>AK1+AK2</i>                                | -0.2661        | 0.4573        |
| Protein-bound Phe        | <i>AK1+AK3</i>                                | 0.1084         | 0.7655        |
| Protein-bound Phe        | <i>AK2</i>                                    | -0.2814        | 0.4309        |
| Protein-bound Phe        | <i>AK2+AK3</i>                                | -0.2724        | 0.4464        |
| Protein-bound Phe        | <i>AK3</i>                                    | 0.0066         | 0.9856        |
| Protein-bound Phe        | <i>AK-HSDH1</i>                               | -0.1490        | 0.6811        |
| Protein-bound Phe        | <i>AK-HSDH2</i>                               | -0.0980        | 0.7876        |
| Protein-bound Phe        | <i>AK-HSDHs</i>                               | -0.1509        | 0.6774        |
| Protein-bound Phe        | <i>AK-HSDHs+CGS1</i>                          | -0.2579        | 0.4718        |
| Protein-bound Phe        | <i>AK-HSDHs+TS1</i>                           | -0.3971        | 0.2558        |
| <b>Protein-bound Phe</b> | <b><i>AK-HSDHs+TS1+TD1</i></b>                | <b>-0.4134</b> | <b>0.2351</b> |
| <b>Protein-bound Phe</b> | <b><i>AK-HSDHs+TS1+THAs</i></b>               | <b>-0.4071</b> | <b>0.2430</b> |
| Protein-bound Phe        | <i>AKs</i>                                    | -0.2602        | 0.4678        |
| Protein-bound Phe        | <i>AKs/AK-HSDHs</i>                           | -0.1083        | 0.7658        |
| Protein-bound Phe        | <i>AKs+AK-HSDHs</i>                           | -0.3111        | 0.3815        |
| Protein-bound Phe        | <i>AKs+AK-HSDHs+CGS1</i>                      | -0.3674        | 0.2964        |
| Protein-bound Phe        | <i>AKs+AK-HSDHs+DHDPSs</i>                    | -0.3261        | 0.3578        |
| <b>Protein-bound Phe</b> | <b><i>AKs+AK-HSDHs+TS1</i></b>                | <b>-0.4578</b> | <b>0.1834</b> |
| <b>Protein-bound Phe</b> | <b><i>AKs+AK-HSDHs+TS1+TD1</i></b>            | <b>-0.4718</b> | <b>0.1686</b> |
| <b>Protein-bound Phe</b> | <b><i>AKs+AK-HSDHs+TS1+THAs</i></b>           | <b>-0.4607</b> | <b>0.1802</b> |
| Protein-bound Phe        | <i>AKs+DHDPSs</i>                             | -0.2778        | 0.4371        |
| <b>Protein-bound Phe</b> | <b><i>BCAT1</i></b>                           | <b>0.4783</b>  | <b>0.1621</b> |
| <b>Protein-bound Phe</b> | <b>Biosynthetic genes analyzed</b>            | <b>-0.4810</b> | <b>0.1593</b> |
| Protein-bound Phe        | Catabolic genes analyzed                      | -0.1386        | 0.7025        |
| Protein-bound Phe        | <i>CGS1</i>                                   | -0.3221        | 0.3640        |
| Protein-bound Phe        | <i>CGS1/SAMSs</i>                             | -0.1325        | 0.7151        |
| Protein-bound Phe        | <i>CGS1/TS1</i>                               | 0.2474         | 0.4908        |
| <b>Protein-bound Phe</b> | <b><i>DHDPS1</i></b>                          | <b>-0.6507</b> | <b>0.0416</b> |
| Protein-bound Phe        | <i>DHDPS2</i>                                 | -0.1305        | 0.7193        |
| <b>Protein-bound Phe</b> | <b><i>DHDPSs</i></b>                          | <b>-0.4732</b> | <b>0.1672</b> |
| Protein-bound Phe        | <i>DHDPSs/AK-HSDHs</i>                        | -0.0101        | 0.9779        |
| Protein-bound Phe        | <i>DHDPSs/LKR-SDH1</i>                        | -0.0784        | 0.8296        |
| Protein-bound Phe        | Free (Lys+Met+Thr+Ile)/Asp                    | -0.2817        | 0.4304        |
| Protein-bound Phe        | Free Ala                                      | -0.3532        | 0.3168        |
| <b>Protein-bound Phe</b> | <b>Free Arg</b>                               | <b>-0.5967</b> | <b>0.0686</b> |
| <b>Protein-bound Phe</b> | <b>Free Asn</b>                               | <b>-0.4553</b> | <b>0.1860</b> |
| Protein-bound Phe        | Free Asn+Asp                                  | -0.2108        | 0.5588        |
| <b>Protein-bound Phe</b> | <b>Free Asn+Asp+Lys+Met+Thr+Ile</b>           | <b>-0.5424</b> | <b>0.1052</b> |
| <b>Protein-bound Phe</b> | <b>Free Asn+Asp+Lys+Thr+Ile</b>               | <b>-0.5395</b> | <b>0.1075</b> |
| Protein-bound Phe        | Free Asp                                      | -0.1728        | 0.6330        |
| <b>Protein-bound Phe</b> | <b>Free Asp+Lys+Met+Thr+Ile</b>               | <b>-0.5286</b> | <b>0.1162</b> |
| <b>Protein-bound Phe</b> | <b>Free Cys</b>                               | <b>-0.5243</b> | <b>0.1198</b> |
| Protein-bound Phe        | Free Gln                                      | -0.3922        | 0.2623        |
| Protein-bound Phe        | Free Glu                                      | -0.1544        | 0.6701        |
| Protein-bound Phe        | Free Gly                                      | -0.1883        | 0.6023        |
| Protein-bound Phe        | Free Gly/Thr                                  | 0.3721         | 0.2896        |
| Protein-bound Phe        | Free Gly+Ile                                  | -0.2388        | 0.5065        |
| <b>Protein-bound Phe</b> | <b>Free His</b>                               | <b>-0.5011</b> | <b>0.1401</b> |
| <b>Protein-bound Phe</b> | <b>Free Ile</b>                               | <b>-0.8275</b> | <b>0.0031</b> |
| Protein-bound Phe        | Free Ile/Thr                                  | 0.3777         | 0.2819        |
| <b>Protein-bound Phe</b> | <b>Free Leu</b>                               | <b>-0.5053</b> | <b>0.1363</b> |
| <b>Protein-bound Phe</b> | <b>Free Lys</b>                               | <b>-0.5558</b> | <b>0.0952</b> |
| Protein-bound Phe        | Free Lys/(Met+Thr+Ile)                        | 0.3176         | 0.3713        |

|                          |                                                     |                |               |
|--------------------------|-----------------------------------------------------|----------------|---------------|
| <b>Protein-bound Phe</b> | <b>Free Lys/Asp</b>                                 | <b>-0.4521</b> | <b>0.1896</b> |
| Protein-bound Phe        | Free Lys/Thr                                        | 0.3430         | 0.3319        |
| <b>Protein-bound Phe</b> | <b>Free Lys+Met+Thr+Ile</b>                         | <b>-0.4827</b> | <b>0.1577</b> |
| Protein-bound Phe        | Free Met                                            | -0.1464        | 0.6865        |
| Protein-bound Phe        | Free Met/(Thr+Ile)                                  | 0.3242         | 0.3608        |
| <b>Protein-bound Phe</b> | <b>Free Met/Thr</b>                                 | <b>0.4130</b>  | <b>0.2355</b> |
| <b>Protein-bound Phe</b> | <b>Free Met+Thr+Ile</b>                             | <b>-0.4616</b> | <b>0.1793</b> |
| <b>Protein-bound Phe</b> | <b>Free Phe</b>                                     | <b>-0.4566</b> | <b>0.1847</b> |
| Protein-bound Phe        | Free Pro                                            | -0.2641        | 0.4609        |
| Protein-bound Phe        | Free Ser                                            | -0.0646        | 0.8592        |
| <b>Protein-bound Phe</b> | <b>Free Thr</b>                                     | <b>-0.4473</b> | <b>0.1950</b> |
| Protein-bound Phe        | Free Thr/(Gly+Ile)                                  | -0.3946        | 0.2591        |
| Protein-bound Phe        | Free Thr/Asp                                        | -0.2717        | 0.4476        |
| Protein-bound Phe        | Free Trp                                            | -0.3838        | 0.2736        |
| <b>Protein-bound Phe</b> | <b>Free Tyr</b>                                     | <b>-0.5199</b> | <b>0.1235</b> |
| Protein-bound Phe        | Free Val                                            | -0.2878        | 0.4200        |
| <b>Protein-bound Phe</b> | <b>HSDH activity with four effectors</b>            | <b>-0.5618</b> | <b>0.0910</b> |
| <b>Protein-bound Phe</b> | <b>HSDH activity without effectors</b>              | <b>-0.4950</b> | <b>0.1458</b> |
| Protein-bound Phe        | <i>LKR-SDHI</i>                                     | -0.2056        | 0.5687        |
| Protein-bound Phe        | Lys-sensitive AK activity                           | -0.0551        | 0.8799        |
| Protein-bound Phe        | Lys-sensitive AK activity/Thr-sensitive AK activity | -0.3789        | 0.2803        |
| Protein-bound Phe        | Protein-bound Ala                                   | 0.1265         | 0.7277        |
| <b>Protein-bound Phe</b> | <b>Protein-bound Arg</b>                            | <b>0.6612</b>  | <b>0.0374</b> |
| Protein-bound Phe        | Protein-bound Gly                                   | -0.0330        | 0.9279        |
| <b>Protein-bound Phe</b> | <b>Protein-bound His</b>                            | <b>0.7327</b>  | <b>0.0159</b> |
| <b>Protein-bound Phe</b> | <b>Protein-bound Ile</b>                            | <b>0.5744</b>  | <b>0.0824</b> |
| Protein-bound Phe        | Protein-bound Leu                                   | 0.1885         | 0.6019        |
| <b>Protein-bound Phe</b> | <b>Protein-bound Lys</b>                            | <b>0.7187</b>  | <b>0.0192</b> |
| Protein-bound Phe        | <i>SAMS1</i>                                        | -0.2053        | 0.5694        |
| <b>Protein-bound Phe</b> | <b><i>SAMS2</i></b>                                 | <b>-0.6165</b> | <b>0.0576</b> |
| Protein-bound Phe        | <i>SAMS3</i>                                        | -0.0293        | 0.9361        |
| Protein-bound Phe        | <i>SAMS4</i>                                        | -0.1551        | 0.6687        |
| Protein-bound Phe        | <i>SAMSs</i>                                        | -0.1359        | 0.7081        |
| <b>Protein-bound Phe</b> | <b><i>TD1</i></b>                                   | <b>-0.4368</b> | <b>0.2069</b> |
| <b>Protein-bound Phe</b> | <b><i>TD1/BCAT1</i></b>                             | <b>-0.4705</b> | <b>0.1699</b> |
| Protein-bound Phe        | <i>THA1</i>                                         | 0.0668         | 0.8544        |
| <b>Protein-bound Phe</b> | <b><i>THA2</i></b>                                  | <b>-0.5626</b> | <b>0.0904</b> |
| <b>Protein-bound Phe</b> | <b><i>THAs</i></b>                                  | <b>-0.5199</b> | <b>0.1235</b> |
| <b>Protein-bound Phe</b> | <b><i>THAs+TD1</i></b>                              | <b>-0.5337</b> | <b>0.1121</b> |
| <b>Protein-bound Phe</b> | <b>Thr-sensitive AK activity</b>                    | <b>0.4727</b>  | <b>0.1677</b> |
| <b>Protein-bound Phe</b> | <b>Total free AAs</b>                               | <b>-0.4019</b> | <b>0.2496</b> |
| <b>Protein-bound Phe</b> | <b><i>TS1</i></b>                                   | <b>-0.4531</b> | <b>0.1884</b> |
| Protein-bound Phe        | <i>TS1/(THAs+TD1)</i>                               | 0.3570         | 0.3112        |
| Protein-bound Phe        | <i>TS1/TD1</i>                                      | 0.3183         | 0.3702        |
| Protein-bound Phe        | <i>TS1/THAs</i>                                     | -0.2154        | 0.5502        |
| Protein-bound Pro        | <i>(AK-HSDHs+CGS1)/SAMSs</i>                        | -0.3742        | 0.2868        |
| Protein-bound Pro        | <i>(AK-HSDHs+TS1)/(THAs+TD1)</i>                    | 0.3232         | 0.3623        |
| <b>Protein-bound Pro</b> | <b><i>(AK-HSDHs+TS1+TD1)/BCAT1</i></b>              | <b>-0.4750</b> | <b>0.1653</b> |
| Protein-bound Pro        | <i>(AKs+AK-HSDHs)/AK-HSDHs</i>                      | -0.2645        | 0.4602        |
| Protein-bound Pro        | <i>(AKs+AK-HSDHs+CGS1)/SAMSs</i>                    | -0.2876        | 0.4204        |
| Protein-bound Pro        | <i>(AKs+AK-HSDHs+DHDPSs)/LKR-SDHI</i>               | -0.1961        | 0.5871        |
| Protein-bound Pro        | <i>(AKs+AK-HSDHs+TS1)/(THAs+TD1)</i>                | 0.0849         | 0.8155        |
| <b>Protein-bound Pro</b> | <b><i>(AKs+AK-HSDHs+TS1+TD1)/BCAT1</i></b>          | <b>-0.4950</b> | <b>0.1458</b> |
| Protein-bound Pro        | <i>(AKs+DHDPSs)/LKR-SDHI</i>                        | -0.2673        | 0.4553        |
| Protein-bound Pro        | AK activity with four effectors                     | -0.1269        | 0.7269        |
| Protein-bound Pro        | AK activity without effectors                       | 0.1121         | 0.7578        |
| Protein-bound Pro        | AK activity/HSDH activity with four effectors       | -0.0568        | 0.8761        |
| Protein-bound Pro        | AK activity/HSDH activity without effectors         | -0.2189        | 0.5435        |

|                          |                              |                |               |
|--------------------------|------------------------------|----------------|---------------|
| Protein-bound Pro        | <i>AK1</i>                   | -0.0087        | 0.9811        |
| Protein-bound Pro        | <i>AK1+AK2</i>               | -0.2866        | 0.4220        |
| Protein-bound Pro        | <i>AK1+AK3</i>               | -0.0110        | 0.9758        |
| Protein-bound Pro        | <i>AK2</i>                   | -0.2760        | 0.4401        |
| Protein-bound Pro        | <i>AK2+AK3</i>               | -0.2689        | 0.4526        |
| Protein-bound Pro        | <i>AK3</i>                   | -0.0104        | 0.9773        |
| <b>Protein-bound Pro</b> | <b><i>AK-HSDH1</i></b>       | <b>0.4901</b>  | <b>0.1505</b> |
| Protein-bound Pro        | <i>AK-HSDH2</i>              | -0.3326        | 0.3477        |
| Protein-bound Pro        | <i>AK-HSDHs</i>              | 0.0568         | 0.8761        |
| Protein-bound Pro        | <i>AK-HSDHs+CGSI</i>         | -0.1347        | 0.7106        |
| Protein-bound Pro        | <i>AK-HSDHs+TS1</i>          | 0.2286         | 0.5253        |
| Protein-bound Pro        | <i>AK-HSDHs+TS1+TD1</i>      | 0.2058         | 0.5683        |
| Protein-bound Pro        | <i>AK-HSDHs+TS1+THAs</i>     | 0.2252         | 0.5315        |
| Protein-bound Pro        | <i>AKs</i>                   | -0.2838        | 0.4268        |
| Protein-bound Pro        | <i>AKs/AK-HSDHs</i>          | -0.2645        | 0.4602        |
| Protein-bound Pro        | <i>AKs+AK-HSDHs</i>          | -0.2803        | 0.4327        |
| Protein-bound Pro        | <i>AKs+AK-HSDHs+CGSI</i>     | -0.3353        | 0.3435        |
| Protein-bound Pro        | <i>AKs+AK-HSDHs+DHDPSs</i>   | -0.2771        | 0.4383        |
| Protein-bound Pro        | <i>AKs+AK-HSDHs+TS1</i>      | -0.0899        | 0.8050        |
| Protein-bound Pro        | <i>AKs+AK-HSDHs+TS1+TD1</i>  | -0.0919        | 0.8007        |
| Protein-bound Pro        | <i>AKs+AK-HSDHs+TS1+THAs</i> | -0.0920        | 0.8005        |
| Protein-bound Pro        | <i>AKs+DHDPSs</i>            | -0.2829        | 0.4284        |
| <b>Protein-bound Pro</b> | <b><i>BCAT1</i></b>          | <b>0.5531</b>  | <b>0.0973</b> |
| Protein-bound Pro        | Biosynthetic genes analyzed  | -0.1341        | 0.7120        |
| Protein-bound Pro        | Catabolic genes analyzed     | 0.0353         | 0.9229        |
| Protein-bound Pro        | <i>CGSI</i>                  | -0.3132        | 0.3782        |
| Protein-bound Pro        | <i>CGSI/SAMSs</i>            | -0.3542        | 0.3152        |
| <b>Protein-bound Pro</b> | <b><i>CGSI/TS1</i></b>       | <b>-0.6990</b> | <b>0.0245</b> |
| Protein-bound Pro        | <i>DHDPS1</i>                | 0.1111         | 0.7600        |
| Protein-bound Pro        | <i>DHDPS2</i>                | -0.0999        | 0.7837        |
| Protein-bound Pro        | <i>DHDPSs</i>                | 0.0041         | 0.9910        |
| Protein-bound Pro        | <i>DHDPSs/AK-HSDHs</i>       | -0.0901        | 0.8044        |
| Protein-bound Pro        | <i>DHDPSs/LKR-SDH1</i>       | -0.0173        | 0.9623        |
| Protein-bound Pro        | Free (Lys+Met+Thr+Ile)/Asp   | 0.3858         | 0.2708        |
| Protein-bound Pro        | Free Ala                     | -0.1454        | 0.6885        |
| <b>Protein-bound Pro</b> | <b>Free Arg</b>              | <b>-0.5545</b> | <b>0.0962</b> |
| <b>Protein-bound Pro</b> | <b>Free Asn</b>              | <b>-0.4327</b> | <b>0.2117</b> |
| Protein-bound Pro        | Free Asn+Asp                 | -0.3728        | 0.2888        |
| Protein-bound Pro        | Free Asn+Asp+Lys+Met+Thr+Ile | 0.0202         | 0.9558        |
| Protein-bound Pro        | Free Asn+Asp+Lys+Thr+Ile     | 0.0258         | 0.9437        |
| Protein-bound Pro        | Free Asp                     | -0.3606        | 0.3061        |
| Protein-bound Pro        | Free Asp+Lys+Met+Thr+Ile     | 0.0533         | 0.8838        |
| Protein-bound Pro        | Free Cys                     | -0.0102        | 0.9778        |
| <b>Protein-bound Pro</b> | <b>Free Gln</b>              | <b>-0.4353</b> | <b>0.2086</b> |
| <b>Protein-bound Pro</b> | <b>Free Glu</b>              | <b>-0.4458</b> | <b>0.1966</b> |
| Protein-bound Pro        | Free Gly                     | -0.1109        | 0.7604        |
| Protein-bound Pro        | Free Gly/Thr                 | 0.1113         | 0.7595        |
| Protein-bound Pro        | Free Gly+Ile                 | -0.1101        | 0.7621        |
| <b>Protein-bound Pro</b> | <b>Free His</b>              | <b>-0.4606</b> | <b>0.1804</b> |
| Protein-bound Pro        | Free Ile                     | -0.0048        | 0.9895        |
| Protein-bound Pro        | Free Ile/Thr                 | 0.1219         | 0.7372        |
| Protein-bound Pro        | Free Leu                     | -0.3713        | 0.2907        |
| <b>Protein-bound Pro</b> | <b>Free Lys</b>              | <b>-0.5485</b> | <b>0.1007</b> |
| Protein-bound Pro        | Free Lys/(Met+Thr+Ile)       | 0.0042         | 0.9908        |
| Protein-bound Pro        | Free Lys/Asp                 | -0.0636        | 0.8615        |
| Protein-bound Pro        | Free Lys/Thr                 | 0.0554         | 0.8792        |
| Protein-bound Pro        | Free Lys+Met+Thr+Ile         | 0.2081         | 0.5639        |



|                          |                                                     |                |                  |
|--------------------------|-----------------------------------------------------|----------------|------------------|
| <b>Protein-bound Pro</b> | <b>Free Met</b>                                     | <b>-0.4927</b> | <b>0.1480</b>    |
| Protein-bound Pro        | Free Met/(Thr+Ile)                                  | 0.0243         | 0.9469           |
| Protein-bound Pro        | Free Met/Thr                                        | 0.0964         | 0.7911           |
| Protein-bound Pro        | Free Met+Thr+Ile                                    | 0.2280         | 0.5264           |
| Protein-bound Pro        | Free Phe                                            | -0.2800        | 0.4332           |
| <b>Protein-bound Pro</b> | <b>Free Pro</b>                                     | <b>-0.5332</b> | <b>0.1125</b>    |
| Protein-bound Pro        | Free Ser                                            | -0.0821        | 0.8215           |
| Protein-bound Pro        | Free Thr                                            | 0.2361         | 0.5114           |
| Protein-bound Pro        | Free Thr/(Gly+Ile)                                  | 0.2230         | 0.5357           |
| Protein-bound Pro        | Free Thr/Asp                                        | 0.3912         | 0.2636           |
| Protein-bound Pro        | Free Trp                                            | -0.1938        | 0.5917           |
| Protein-bound Pro        | Free Tyr                                            | -0.3765        | 0.2835           |
| Protein-bound Pro        | Free Val                                            | -0.0843        | 0.8169           |
| Protein-bound Pro        | HSDH activity with four effectors                   | -0.2305        | 0.5216           |
| Protein-bound Pro        | HSDH activity without effectors                     | 0.1292         | 0.7220           |
| Protein-bound Pro        | <i>LKR-SDHI</i>                                     | 0.1896         | 0.5999           |
| Protein-bound Pro        | Lys-sensitive AK activity                           | 0.1547         | 0.6696           |
| Protein-bound Pro        | Lys-sensitive AK activity/Thr-sensitive AK activity | -0.3401        | 0.3363           |
| <b>Protein-bound Pro</b> | <b>Protein-bound Ala</b>                            | <b>0.9530</b>  | <b>&lt;.0001</b> |
| <b>Protein-bound Pro</b> | <b>Protein-bound Arg</b>                            | <b>0.4036</b>  | <b>0.2474</b>    |
| <b>Protein-bound Pro</b> | <b>Protein-bound Gly</b>                            | <b>0.9085</b>  | <b>0.0003</b>    |
| Protein-bound Pro        | Protein-bound His                                   | 0.1905         | 0.5981           |
| <b>Protein-bound Pro</b> | <b>Protein-bound Ile</b>                            | <b>0.4293</b>  | <b>0.2157</b>    |
| Protein-bound Pro        | Protein-bound Leu                                   | 0.3520         | 0.3185           |
| Protein-bound Pro        | Protein-bound Lys                                   | 0.2630         | 0.4629           |
| Protein-bound Pro        | Protein-bound Phe                                   | 0.2125         | 0.5555           |
| Protein-bound Pro        | <i>SAMS1</i>                                        | -0.2343        | 0.5148           |
| Protein-bound Pro        | <i>SAMS2</i>                                        | 0.0350         | 0.9236           |
| Protein-bound Pro        | <i>SAMS3</i>                                        | 0.1337         | 0.7127           |
| Protein-bound Pro        | <i>SAMS4</i>                                        | 0.0883         | 0.8082           |
| Protein-bound Pro        | <i>SAMSs</i>                                        | 0.0315         | 0.9311           |
| Protein-bound Pro        | <i>TD1</i>                                          | -0.0769        | 0.8328           |
| <b>Protein-bound Pro</b> | <b><i>TD1/BCAT1</i></b>                             | <b>-0.4839</b> | <b>0.1564</b>    |
| <b>Protein-bound Pro</b> | <b><i>THA1</i></b>                                  | <b>0.4035</b>  | <b>0.2476</b>    |
| Protein-bound Pro        | <i>THA2</i>                                         | -0.2411        | 0.5021           |
| Protein-bound Pro        | <i>THAs</i>                                         | -0.2185        | 0.5441           |
| Protein-bound Pro        | <i>THAs+TD1</i>                                     | -0.1069        | 0.7688           |
| <b>Protein-bound Pro</b> | <b>Thr-sensitive AK activity</b>                    | <b>0.5437</b>  | <b>0.1042</b>    |
| Protein-bound Pro        | Total free AAs                                      | -0.3589        | 0.3085           |
| Protein-bound Pro        | <i>TS1</i>                                          | 0.2750         | 0.4419           |
| <b>Protein-bound Pro</b> | <b><i>TS1/(THAs+TD1)</i></b>                        | <b>0.4325</b>  | <b>0.2119</b>    |
| Protein-bound Pro        | <i>TS1/TD1</i>                                      | 0.2222         | 0.5373           |
| Protein-bound Pro        | <i>TS1/THAs</i>                                     | 0.2084         | 0.5634           |
| Protein-bound Ser        | <i>(AK-HSDHs+CGS1)/SAMSs</i>                        | -0.2217        | 0.5381           |
| <b>Protein-bound Ser</b> | <b><i>(AK-HSDHs+TS1)/(THAs+TD1)</i></b>             | <b>0.4469</b>  | <b>0.1954</b>    |
| <b>Protein-bound Ser</b> | <b><i>(AK-HSDHs+TS1+TD1)/BCAT1</i></b>              | <b>-0.4342</b> | <b>0.2099</b>    |
| Protein-bound Ser        | <i>(AKs+AK-HSDHs)/AK-HSDHs</i>                      | -0.3120        | 0.3802           |
| Protein-bound Ser        | <i>(AKs+AK-HSDHs+CGS1)/SAMSs</i>                    | -0.2633        | 0.4623           |
| Protein-bound Ser        | <i>(AKs+AK-HSDHs+DHDPs)/LKR-SDHI</i>                | 0.1765         | 0.6258           |
| Protein-bound Ser        | <i>(AKs+AK-HSDHs+TS1)/(THAs+TD1)</i>                | 0.2427         | 0.4992           |
| <b>Protein-bound Ser</b> | <b><i>(AKs+AK-HSDHs+TS1+TD1)/BCAT1</i></b>          | <b>-0.4519</b> | <b>0.1898</b>    |
| Protein-bound Ser        | <i>(AKs+DHDPs)/LKR-SDHI</i>                         | 0.1041         | 0.7747           |
| Protein-bound Ser        | AK activity with four effectors                     | 0.2627         | 0.4633           |
| <b>Protein-bound Ser</b> | <b>AK activity without effectors</b>                | <b>0.4741</b>  | <b>0.1663</b>    |
| Protein-bound Ser        | AK activity/HSDH activity with four effectors       | 0.1907         | 0.5976           |
| Protein-bound Ser        | AK activity/HSDH activity without effectors         | 0.0273         | 0.9404           |
| Protein-bound Ser        | <i>AKI</i>                                          | -0.1967        | 0.5859           |

|                          |                                 |                |               |
|--------------------------|---------------------------------|----------------|---------------|
| Protein-bound Ser        | <i>AK1+AK2</i>                  | -0.1730        | 0.6327        |
| Protein-bound Ser        | <i>AK1+AK3</i>                  | -0.1116        | 0.7589        |
| Protein-bound Ser        | <i>AK2</i>                      | -0.1270        | 0.7266        |
| Protein-bound Ser        | <i>AK2+AK3</i>                  | -0.1087        | 0.7649        |
| Protein-bound Ser        | <i>AK3</i>                      | 0.0798         | 0.8265        |
| <b>Protein-bound Ser</b> | <b><i>AK-HSDH1</i></b>          | <b>0.6230</b>  | <b>0.0544</b> |
| Protein-bound Ser        | <i>AK-HSDH2</i>                 | -0.1194        | 0.7425        |
| Protein-bound Ser        | <i>AK-HSDHs</i>                 | 0.2704         | 0.4499        |
| Protein-bound Ser        | <i>AK-HSDHs+CGS1</i>            | 0.1823         | 0.6143        |
| <b>Protein-bound Ser</b> | <b><i>AK-HSDHs+TS1</i></b>      | <b>0.4337</b>  | <b>0.2104</b> |
| <b>Protein-bound Ser</b> | <b><i>AK-HSDHs+TS1+TD1</i></b>  | <b>0.4014</b>  | <b>0.2502</b> |
| <b>Protein-bound Ser</b> | <b><i>AK-HSDHs+TS1+THAs</i></b> | <b>0.4327</b>  | <b>0.2116</b> |
| Protein-bound Ser        | <i>AKs</i>                      | -0.1560        | 0.6670        |
| Protein-bound Ser        | <i>AKs/AK-HSDHs</i>             | -0.3120        | 0.3802        |
| Protein-bound Ser        | <i>AKs+AK-HSDHs</i>             | -0.0915        | 0.8015        |
| Protein-bound Ser        | <i>AKs+AK-HSDHs+CGS1</i>        | -0.0733        | 0.8406        |
| Protein-bound Ser        | <i>AKs+AK-HSDHs+DHDPSs</i>      | -0.0911        | 0.8024        |
| Protein-bound Ser        | <i>AKs+AK-HSDHs+TS1</i>         | 0.1401         | 0.6994        |
| Protein-bound Ser        | <i>AKs+AK-HSDHs+TS1+TD1</i>     | 0.1346         | 0.7108        |
| Protein-bound Ser        | <i>AKs+AK-HSDHs+TS1+THAs</i>    | 0.1392         | 0.7013        |
| Protein-bound Ser        | <i>AKs+DHDPSs</i>               | -0.1564        | 0.6662        |
| <b>Protein-bound Ser</b> | <b><i>BCAT1</i></b>             | <b>0.6372</b>  | <b>0.0475</b> |
| Protein-bound Ser        | Biosynthetic genes analyzed     | 0.1356         | 0.7089        |
| Protein-bound Ser        | Catabolic genes analyzed        | 0.2091         | 0.5622        |
| Protein-bound Ser        | <i>CGS1</i>                     | 0.0528         | 0.8848        |
| Protein-bound Ser        | <i>CGS1/SAMSs</i>               | -0.3362        | 0.3422        |
| <b>Protein-bound Ser</b> | <b><i>CGS1/TS1</i></b>          | <b>-0.5661</b> | <b>0.0880</b> |
| Protein-bound Ser        | <i>DHDPS1</i>                   | -0.1498        | 0.6795        |
| Protein-bound Ser        | <i>DHDPS2</i>                   | 0.0948         | 0.7944        |
| Protein-bound Ser        | <i>DHDPSs</i>                   | -0.0239        | 0.9477        |
| Protein-bound Ser        | <i>DHDPSs/AK-HSDHs</i>          | -0.3214        | 0.3652        |
| Protein-bound Ser        | <i>DHDPSs/LKR-SDH1</i>          | 0.2198         | 0.5418        |
| Protein-bound Ser        | Free (Lys+Met+Thr+Ile)/Asp      | 0.3921         | 0.2624        |
| Protein-bound Ser        | Free Ala                        | -0.1521        | 0.6748        |
| <b>Protein-bound Ser</b> | <b>Free Arg</b>                 | <b>-0.4323</b> | <b>0.2122</b> |
| <b>Protein-bound Ser</b> | <b>Free Asn</b>                 | <b>-0.4344</b> | <b>0.2096</b> |
| <b>Protein-bound Ser</b> | <b>Free Asn+Asp</b>             | <b>-0.5168</b> | <b>0.1262</b> |
| Protein-bound Ser        | Free Asn+Asp+Lys+Met+Thr+Ile    | -0.1154        | 0.7508        |
| Protein-bound Ser        | Free Asn+Asp+Lys+Thr+Ile        | -0.1112        | 0.7597        |
| <b>Protein-bound Ser</b> | <b>Free Asp</b>                 | <b>-0.5246</b> | <b>0.1195</b> |
| Protein-bound Ser        | Free Asp+Lys+Met+Thr+Ile        | -0.0874        | 0.8103        |
| Protein-bound Ser        | Free Cys                        | -0.1488        | 0.6817        |
| <b>Protein-bound Ser</b> | <b>Free Gln</b>                 | <b>-0.4497</b> | <b>0.1922</b> |
| <b>Protein-bound Ser</b> | <b>Free Glu</b>                 | <b>-0.5445</b> | <b>0.1036</b> |
| Protein-bound Ser        | Free Gly                        | -0.2608        | 0.4668        |
| Protein-bound Ser        | Free Gly/Thr                    | -0.0613        | 0.8665        |
| Protein-bound Ser        | Free Gly+Ile                    | -0.2554        | 0.4763        |
| Protein-bound Ser        | Free His                        | -0.3203        | 0.3670        |
| Protein-bound Ser        | Free Ile                        | 0.0421         | 0.9080        |
| Protein-bound Ser        | Free Ile/Thr                    | 0.0625         | 0.8638        |
| Protein-bound Ser        | Free Leu                        | -0.3325        | 0.3479        |
| <b>Protein-bound Ser</b> | <b>Free Lys</b>                 | <b>-0.4942</b> | <b>0.1465</b> |
| Protein-bound Ser        | Free Lys/(Met+Thr+Ile)          | -0.0520        | 0.8865        |
| Protein-bound Ser        | Free Lys/Asp                    | 0.1828         | 0.6131        |
| Protein-bound Ser        | Free Lys/Thr                    | -0.0144        | 0.9685        |
| Protein-bound Ser        | Free Lys+Met+Thr+Ile            | 0.1293         | 0.7218        |
| <b>Protein-bound Ser</b> | <b>Free Met</b>                 | <b>-0.5504</b> | <b>0.0992</b> |

|                          |                                                     |                |                  |
|--------------------------|-----------------------------------------------------|----------------|------------------|
| Protein-bound Ser        | Free Met/(Thr+Ile)                                  | -0.1142        | 0.7534           |
| Protein-bound Ser        | Free Met/Thr                                        | -0.0444        | 0.9032           |
| Protein-bound Ser        | Free Met+Thr+Ile                                    | 0.1473         | 0.6847           |
| Protein-bound Ser        | Free Phe                                            | -0.1920        | 0.5952           |
| <b>Protein-bound Ser</b> | <b>Free Pro</b>                                     | <b>-0.5883</b> | <b>0.0736</b>    |
| Protein-bound Ser        | Free Ser                                            | -0.2142        | 0.5523           |
| Protein-bound Ser        | Free Thr                                            | 0.1554         | 0.6682           |
| Protein-bound Ser        | Free Thr/(Gly+Ile)                                  | 0.1955         | 0.5884           |
| Protein-bound Ser        | Free Thr/Asp                                        | 0.3857         | 0.2710           |
| Protein-bound Ser        | Free Trp                                            | -0.1324        | 0.7154           |
| Protein-bound Ser        | Free Tyr                                            | -0.2303        | 0.5222           |
| Protein-bound Ser        | Free Val                                            | 0.1111         | 0.7600           |
| Protein-bound Ser        | HSDH activity with four effectors                   | -0.0549        | 0.8802           |
| Protein-bound Ser        | HSDH activity without effectors                     | 0.2128         | 0.5550           |
| Protein-bound Ser        | <i>LKR-SDHI</i>                                     | -0.1184        | 0.7447           |
| Protein-bound Ser        | Lys-sensitive AK activity                           | 0.3719         | 0.2899           |
| Protein-bound Ser        | Lys-sensitive AK activity/Thr-sensitive AK activity | -0.2490        | 0.4879           |
| <b>Protein-bound Ser</b> | <b>Protein-bound Ala</b>                            | <b>0.9365</b>  | <b>&lt;.0001</b> |
| Protein-bound Ser        | Protein-bound Arg                                   | 0.2580         | 0.4717           |
| <b>Protein-bound Ser</b> | <b>Protein-bound Gly</b>                            | <b>0.8972</b>  | <b>0.0004</b>    |
| Protein-bound Ser        | Protein-bound His                                   | 0.3499         | 0.3216           |
| Protein-bound Ser        | Protein-bound Ile                                   | 0.3375         | 0.3402           |
| <b>Protein-bound Ser</b> | <b>Protein-bound Leu</b>                            | <b>0.5457</b>  | <b>0.1027</b>    |
| Protein-bound Ser        | Protein-bound Lys                                   | 0.2522         | 0.4821           |
| Protein-bound Ser        | Protein-bound Phe                                   | 0.2150         | 0.5508           |
| <b>Protein-bound Ser</b> | <b>Protein-bound Pro</b>                            | <b>0.8837</b>  | <b>0.0007</b>    |
| Protein-bound Ser        | <i>SAMS1</i>                                        | -0.2685        | 0.4533           |
| Protein-bound Ser        | <i>SAMS2</i>                                        | -0.0185        | 0.9595           |
| Protein-bound Ser        | <i>SAMS3</i>                                        | 0.3366         | 0.3416           |
| Protein-bound Ser        | <i>SAMS4</i>                                        | 0.3099         | 0.3835           |
| Protein-bound Ser        | <i>SAMSs</i>                                        | 0.2047         | 0.5706           |
| Protein-bound Ser        | <i>TD1</i>                                          | -0.0212        | 0.9536           |
| <b>Protein-bound Ser</b> | <b><i>TD1/BCAT1</i></b>                             | <b>-0.4473</b> | <b>0.1949</b>    |
| Protein-bound Ser        | <i>THA1</i>                                         | 0.0490         | 0.8931           |
| Protein-bound Ser        | <i>THA2</i>                                         | -0.0331        | 0.9277           |
| Protein-bound Ser        | <i>THAs</i>                                         | -0.0486        | 0.8940           |
| Protein-bound Ser        | <i>THAs+TD1</i>                                     | -0.0217        | 0.9525           |
| <b>Protein-bound Ser</b> | <b>Thr-sensitive AK activity</b>                    | <b>0.6517</b>  | <b>0.0412</b>    |
| <b>Protein-bound Ser</b> | <b>Total free AAs</b>                               | <b>-0.4480</b> | <b>0.1942</b>    |
| <b>Protein-bound Ser</b> | <b><i>TS1</i></b>                                   | <b>0.4485</b>  | <b>0.1936</b>    |
| <b>Protein-bound Ser</b> | <b><i>TS1/(THAs+TD1)</i></b>                        | <b>0.5028</b>  | <b>0.1385</b>    |
| Protein-bound Ser        | <i>TS1/TD1</i>                                      | 0.3310         | 0.3502           |
| Protein-bound Ser        | <i>TS1/THAs</i>                                     | 0.1595         | 0.6599           |
| Protein-bound Thr        | <i>(AK-HSDHs+CGS1)/SAMSs</i>                        | -0.2959        | 0.4065           |
| Protein-bound Thr        | <i>(AK-HSDHs+TS1)/(THAs+TD1)</i>                    | 0.2926         | 0.4120           |
| Protein-bound Thr        | <i>(AK-HSDHs+TS1+TD1)/BCAT1</i>                     | -0.3794        | 0.2796           |
| <b>Protein-bound Thr</b> | <b><i>(AKs+AK-HSDHs)/AK-HSDHs</i></b>               | <b>-0.4611</b> | <b>0.1798</b>    |
| <b>Protein-bound Thr</b> | <b><i>(AKs+AK-HSDHs+CGS1)/SAMSs</i></b>             | <b>-0.4237</b> | <b>0.2224</b>    |
| Protein-bound Thr        | <i>(AKs+AK-HSDHs+DHDPs)/LKR-SDHI</i>                | -0.0776        | 0.8313           |
| Protein-bound Thr        | <i>(AKs+AK-HSDHs+TS1)/(THAs+TD1)</i>                | -0.0244        | 0.9467           |
| <b>Protein-bound Thr</b> | <b><i>(AKs+AK-HSDHs+TS1+TD1)/BCAT1</i></b>          | <b>-0.4052</b> | <b>0.2453</b>    |
| Protein-bound Thr        | <i>(AKs+DHDPs)/LKR-SDHI</i>                         | -0.1993        | 0.5809           |
| Protein-bound Thr        | AK activity with four effectors                     | -0.1547        | 0.6696           |
| Protein-bound Thr        | AK activity without effectors                       | 0.0663         | 0.8557           |
| Protein-bound Thr        | AK activity/HSDH activity with four effectors       | -0.1985        | 0.5826           |
| Protein-bound Thr        | AK activity/HSDH activity without effectors         | -0.2969        | 0.4048           |
| Protein-bound Thr        | <i>AK1</i>                                          | -0.2203        | 0.5408           |

|                          |                              |                |               |
|--------------------------|------------------------------|----------------|---------------|
| <b>Protein-bound Thr</b> | <b>AK1+AK2</b>               | <b>-0.4275</b> | <b>0.2178</b> |
| Protein-bound Thr        | AK1+AK3                      | -0.1005        | 0.7823        |
| Protein-bound Thr        | AK2                          | -0.3676        | 0.2961        |
| Protein-bound Thr        | AK2+AK3                      | -0.3349        | 0.3442        |
| Protein-bound Thr        | AK3                          | 0.1257         | 0.7293        |
| <b>Protein-bound Thr</b> | <b>AK-HSDH1</b>              | <b>0.6088</b>  | <b>0.0618</b> |
| Protein-bound Thr        | AK-HSDH2                     | -0.0747        | 0.8374        |
| Protein-bound Thr        | AK-HSDHs                     | 0.2917         | 0.4135        |
| Protein-bound Thr        | AK-HSDHs+CGS1                | 0.1370         | 0.7059        |
| <b>Protein-bound Thr</b> | <b>AK-HSDHs+TS1</b>          | <b>0.4234</b>  | <b>0.2228</b> |
| <b>Protein-bound Thr</b> | <b>AK-HSDHs+TS1+TD1</b>      | <b>0.4056</b>  | <b>0.2449</b> |
| <b>Protein-bound Thr</b> | <b>AK-HSDHs+TS1+THAs</b>     | <b>0.4180</b>  | <b>0.2293</b> |
| Protein-bound Thr        | AKs                          | -0.3981        | 0.2546        |
| <b>Protein-bound Thr</b> | <b>AKs/AK-HSDHs</b>          | <b>-0.4611</b> | <b>0.1798</b> |
| Protein-bound Thr        | AKs+AK-HSDHs                 | -0.3372        | 0.3407        |
| Protein-bound Thr        | AKs+AK-HSDHs+CGS1            | -0.3301        | 0.3516        |
| Protein-bound Thr        | AKs+AK-HSDHs+DHDPSs          | -0.3286        | 0.3538        |
| Protein-bound Thr        | AKs+AK-HSDHs+TS1             | -0.0632        | 0.8623        |
| Protein-bound Thr        | AKs+AK-HSDHs+TS1+TD1         | -0.0535        | 0.8834        |
| Protein-bound Thr        | AKs+AK-HSDHs+TS1+THAs        | -0.0669        | 0.8544        |
| Protein-bound Thr        | AKs+DHDPSs                   | -0.3914        | 0.2633        |
| <b>Protein-bound Thr</b> | <b>BCAT1</b>                 | <b>0.4037</b>  | <b>0.2473</b> |
| Protein-bound Thr        | Biosynthetic genes analyzed  | -0.0621        | 0.8647        |
| Protein-bound Thr        | Catabolic genes analyzed     | 0.2295         | 0.5235        |
| Protein-bound Thr        | CGS1                         | -0.0548        | 0.8805        |
| Protein-bound Thr        | CGS1/SAMSs                   | -0.3968        | 0.2563        |
| <b>Protein-bound Thr</b> | <b>CGS1/TS1</b>              | <b>-0.6397</b> | <b>0.0464</b> |
| Protein-bound Thr        | DHDPS1                       | 0.0469         | 0.8976        |
| Protein-bound Thr        | DHDPS2                       | 0.1405         | 0.6986        |
| Protein-bound Thr        | DHDPSs                       | 0.1250         | 0.7307        |
| Protein-bound Thr        | DHDPSs/AK-HSDHs              | -0.3076        | 0.3873        |
| Protein-bound Thr        | DHDPSs/LKR-SDH1              | 0.2276         | 0.5271        |
| Protein-bound Thr        | Free (Lys+Met+Thr+Ile)/Asp   | 0.0917         | 0.8010        |
| Protein-bound Thr        | Free Ala                     | 0.1268         | 0.7271        |
| <b>Protein-bound Thr</b> | <b>Free Arg</b>              | <b>-0.4140</b> | <b>0.2342</b> |
| Protein-bound Thr        | Free Asn                     | -0.2861        | 0.4229        |
| Protein-bound Thr        | Free Asn+Asp                 | -0.2439        | 0.4971        |
| Protein-bound Thr        | Free Asn+Asp+Lys+Met+Thr+Ile | -0.1709        | 0.6369        |
| Protein-bound Thr        | Free Asn+Asp+Lys+Thr+Ile     | -0.1685        | 0.6418        |
| Protein-bound Thr        | Free Asp                     | -0.2382        | 0.5075        |
| Protein-bound Thr        | Free Asp+Lys+Met+Thr+Ile     | -0.1540        | 0.6709        |
| Protein-bound Thr        | Free Cys                     | -0.2643        | 0.4606        |
| Protein-bound Thr        | Free Gln                     | -0.2930        | 0.4113        |
| <b>Protein-bound Thr</b> | <b>Free Glu</b>              | <b>-0.4148</b> | <b>0.2332</b> |
| Protein-bound Thr        | Free Gly                     | -0.0169        | 0.9630        |
| Protein-bound Thr        | Free Gly/Thr                 | 0.3072         | 0.3878        |
| Protein-bound Thr        | Free Gly+Ile                 | -0.0144        | 0.9685        |
| Protein-bound Thr        | Free His                     | -0.2691        | 0.4522        |
| Protein-bound Thr        | Free Ile                     | 0.0365         | 0.9203        |
| Protein-bound Thr        | Free Ile/Thr                 | 0.3815         | 0.2767        |
| Protein-bound Thr        | Free Leu                     | -0.1461        | 0.6872        |
| Protein-bound Thr        | Free Lys                     | -0.3630        | 0.3026        |
| Protein-bound Thr        | Free Lys/(Met+Thr+Ile)       | 0.2854         | 0.4241        |
| Protein-bound Thr        | Free Lys/Asp                 | -0.0666        | 0.8550        |
| Protein-bound Thr        | Free Lys/Thr                 | 0.3245         | 0.3603        |
| Protein-bound Thr        | Free Lys+Met+Thr+Ile         | -0.0646        | 0.8592        |
| Protein-bound Thr        | Free Met                     | -0.3819        | 0.2762        |

|                          |                                                            |                |                  |
|--------------------------|------------------------------------------------------------|----------------|------------------|
| Protein-bound Thr        | Free Met/(Thr+Ile)                                         | 0.2561         | 0.4750           |
| Protein-bound Thr        | Free Met/Thr                                               | 0.3253         | 0.3591           |
| Protein-bound Thr        | Free Met+Thr+Ile                                           | -0.0512        | 0.8882           |
| Protein-bound Thr        | Free Phe                                                   | 0.0146         | 0.9681           |
| Protein-bound Thr        | Free Pro                                                   | -0.3969        | 0.2561           |
| Protein-bound Thr        | Free Ser                                                   | 0.1057         | 0.7714           |
| Protein-bound Thr        | Free Thr                                                   | -0.0467        | 0.8981           |
| Protein-bound Thr        | Free Thr/(Gly+Ile)                                         | -0.0729        | 0.8415           |
| Protein-bound Thr        | Free Thr/Asp                                               | 0.0926         | 0.7992           |
| Protein-bound Thr        | Free Trp                                                   | 0.0693         | 0.8492           |
| Protein-bound Thr        | Free Tyr                                                   | -0.0884        | 0.8080           |
| Protein-bound Thr        | Free Val                                                   | 0.2242         | 0.5335           |
| Protein-bound Thr        | HSDH activity with four effectors                          | -0.0436        | 0.9048           |
| Protein-bound Thr        | HSDH activity without effectors                            | 0.2072         | 0.5658           |
| Protein-bound Thr        | <i>LKR-SDHI</i>                                            | -0.0006        | 0.9987           |
| Protein-bound Thr        | Lys-sensitive AK activity                                  | -0.0303        | 0.9338           |
| <b>Protein-bound Thr</b> | <b>Lys-sensitive AK activity/Thr-sensitive AK activity</b> | <b>-0.5433</b> | <b>0.1045</b>    |
| <b>Protein-bound Thr</b> | <b>Protein-bound Ala</b>                                   | <b>0.9460</b>  | <b>&lt;.0001</b> |
| Protein-bound Thr        | Protein-bound Arg                                          | 0.2970         | 0.4047           |
| <b>Protein-bound Thr</b> | <b>Protein-bound Gly</b>                                   | <b>0.8542</b>  | <b>0.0017</b>    |
| Protein-bound Thr        | Protein-bound His                                          | 0.1779         | 0.6229           |
| Protein-bound Thr        | Protein-bound Ile                                          | 0.2769         | 0.4387           |
| <b>Protein-bound Thr</b> | <b>Protein-bound Leu</b>                                   | <b>0.5059</b>  | <b>0.1357</b>    |
| Protein-bound Thr        | Protein-bound Lys                                          | 0.3384         | 0.3388           |
| Protein-bound Thr        | Protein-bound Phe                                          | 0.2189         | 0.5435           |
| <b>Protein-bound Thr</b> | <b>Protein-bound Pro</b>                                   | <b>0.9225</b>  | <b>0.0001</b>    |
| <b>Protein-bound Thr</b> | <b>Protein-bound Ser</b>                                   | <b>0.8818</b>  | <b>0.0007</b>    |
| Protein-bound Thr        | <i>SAMS1</i>                                               | 0.0072         | 0.9842           |
| Protein-bound Thr        | <i>SAMS2</i>                                               | 0.1263         | 0.7280           |
| Protein-bound Thr        | <i>SAMS3</i>                                               | 0.2208         | 0.5398           |
| Protein-bound Thr        | <i>SAMS4</i>                                               | 0.3361         | 0.3423           |
| Protein-bound Thr        | <i>SAMSs</i>                                               | 0.2260         | 0.5302           |
| Protein-bound Thr        | <i>TD1</i>                                                 | 0.1279         | 0.7246           |
| Protein-bound Thr        | <i>TD1/BCAT1</i>                                           | -0.3767        | 0.2833           |
| Protein-bound Thr        | <i>THA1</i>                                                | 0.3163         | 0.3732           |
| Protein-bound Thr        | <i>THA2</i>                                                | -0.2801        | 0.4331           |
| Protein-bound Thr        | <i>THAs</i>                                                | -0.2885        | 0.4189           |
| Protein-bound Thr        | <i>THAs+TD1</i>                                            | 0.0778         | 0.8308           |
| <b>Protein-bound Thr</b> | <b>Thr-sensitive AK activity</b>                           | <b>0.7837</b>  | <b>0.0073</b>    |
| Protein-bound Thr        | Total free AAs                                             | -0.2914        | 0.4140           |
| <b>Protein-bound Thr</b> | <b><i>TSI</i></b>                                          | <b>0.4259</b>  | <b>0.2197</b>    |
| Protein-bound Thr        | <i>TSI/(THAs+TD1)</i>                                      | 0.3456         | 0.3281           |
| Protein-bound Thr        | <i>TSI/TD1</i>                                             | 0.1497         | 0.6798           |
| Protein-bound Thr        | <i>TSI/THAs</i>                                            | 0.3573         | 0.3108           |
| Protein-bound Tyr        | <i>(AK-HSDHs+CGS1)/SAMSs</i>                               | -0.2909        | 0.4149           |
| Protein-bound Tyr        | <i>(AK-HSDHs+TSI)/(THAs+TD1)</i>                           | 0.1315         | 0.7172           |
| Protein-bound Tyr        | <i>(AK-HSDHs+TSI+TD1)/BCAT1</i>                            | -0.3259        | 0.3581           |
| Protein-bound Tyr        | <i>(AKs+AK-HSDHs)/AK-HSDHs</i>                             | -0.2572        | 0.4732           |
| Protein-bound Tyr        | <i>(AKs+AK-HSDHs+CGS1)/SAMSs</i>                           | -0.2990        | 0.4013           |
| Protein-bound Tyr        | <i>(AKs+AK-HSDHs+DHDPs)/LKR-SDHI</i>                       | 0.1953         | 0.5887           |
| Protein-bound Tyr        | <i>(AKs+AK-HSDHs+TSI)/(THAs+TD1)</i>                       | -0.0219        | 0.9521           |
| Protein-bound Tyr        | <i>(AKs+AK-HSDHs+TSI+TD1)/BCAT1</i>                        | -0.3357        | 0.3429           |
| Protein-bound Tyr        | <i>(AKs+DHDPs)/LKR-SDHI</i>                                | 0.1532         | 0.6726           |
| Protein-bound Tyr        | AK activity with four effectors                            | 0.2707         | 0.4493           |
| Protein-bound Tyr        | AK activity without effectors                              | 0.3862         | 0.2703           |
| Protein-bound Tyr        | AK activity/HSDH activity with four effectors              | 0.3390         | 0.3380           |
| Protein-bound Tyr        | AK activity/HSDH activity without effectors                | 0.2410         | 0.5024           |

|                          |                                 |               |               |
|--------------------------|---------------------------------|---------------|---------------|
| Protein-bound Tyr        | <i>AK1</i>                      | -0.3731       | 0.2883        |
| Protein-bound Tyr        | <i>AK1+AK2</i>                  | -0.1327       | 0.7147        |
| Protein-bound Tyr        | <i>AK1+AK3</i>                  | -0.2136       | 0.5535        |
| Protein-bound Tyr        | <i>AK2</i>                      | -0.0509       | 0.8890        |
| Protein-bound Tyr        | <i>AK2+AK3</i>                  | -0.0223       | 0.9513        |
| Protein-bound Tyr        | <i>AK3</i>                      | 0.1590        | 0.6609        |
| Protein-bound Tyr        | <i>AK-HSDH1</i>                 | 0.3763        | 0.2838        |
| Protein-bound Tyr        | <i>AK-HSDH2</i>                 | 0.0674        | 0.8532        |
| Protein-bound Tyr        | <i>AK-HSDHs</i>                 | 0.2533        | 0.4801        |
| Protein-bound Tyr        | <i>AK-HSDHs+CGS1</i>            | 0.3003        | 0.3992        |
| <b>Protein-bound Tyr</b> | <b><i>AK-HSDHs+TS1</i></b>      | <b>0.4682</b> | <b>0.1723</b> |
| <b>Protein-bound Tyr</b> | <b><i>AK-HSDHs+TS1+TD1</i></b>  | <b>0.4562</b> | <b>0.1851</b> |
| <b>Protein-bound Tyr</b> | <b><i>AK-HSDHs+TS1+THAs</i></b> | <b>0.4681</b> | <b>0.1725</b> |
| Protein-bound Tyr        | <i>AKs</i>                      | -0.1022       | 0.7787        |
| Protein-bound Tyr        | <i>AKs/AK-HSDHs</i>             | -0.2572       | 0.4732        |
| Protein-bound Tyr        | <i>AKs+AK-HSDHs</i>             | -0.0403       | 0.9121        |
| Protein-bound Tyr        | <i>AKs+AK-HSDHs+CGS1</i>        | 0.0300        | 0.9344        |
| Protein-bound Tyr        | <i>AKs+AK-HSDHs+DHDPSs</i>      | -0.0347       | 0.9241        |
| Protein-bound Tyr        | <i>AKs+AK-HSDHs+TS1</i>         | 0.2046        | 0.5707        |
| Protein-bound Tyr        | <i>AKs+AK-HSDHs+TS1+TD1</i>     | 0.2122        | 0.5562        |
| Protein-bound Tyr        | <i>AKs+AK-HSDHs+TS1+THAs</i>    | 0.2045        | 0.5710        |
| Protein-bound Tyr        | <i>AKs+DHDPSs</i>               | -0.0968       | 0.7901        |
| Protein-bound Tyr        | <i>BCAT1</i>                    | 0.3792        | 0.2799        |
| Protein-bound Tyr        | Biosynthetic genes analyzed     | 0.2394        | 0.5053        |
| Protein-bound Tyr        | Catabolic genes analyzed        | 0.3434        | 0.3313        |
| Protein-bound Tyr        | <i>CGS1</i>                     | 0.2947        | 0.4085        |
| Protein-bound Tyr        | <i>CGS1/SAMSs</i>               | -0.3254       | 0.3589        |
| Protein-bound Tyr        | <i>CGS1/TS1</i>                 | -0.3598       | 0.3071        |
| Protein-bound Tyr        | <i>DHDPS1</i>                   | -0.2216       | 0.5384        |
| Protein-bound Tyr        | <i>DHDPS2</i>                   | 0.3715        | 0.2905        |
| Protein-bound Tyr        | <i>DHDPSs</i>                   | 0.1223        | 0.7365        |
| Protein-bound Tyr        | <i>DHDPSs/AK-HSDHs</i>          | -0.2815       | 0.4308        |
| Protein-bound Tyr        | <i>DHDPSs/LKR-SDH1</i>          | 0.3178        | 0.3709        |
| Protein-bound Tyr        | Free (Lys+Met+Thr+Ile)/Asp      | 0.2206        | 0.5402        |
| Protein-bound Tyr        | Free Ala                        | 0.0919        | 0.8007        |
| Protein-bound Tyr        | Free Arg                        | -0.3101       | 0.3833        |
| Protein-bound Tyr        | Free Asn                        | -0.1896       | 0.5999        |
| Protein-bound Tyr        | Free Asn+Asp                    | -0.2410       | 0.5025        |
| Protein-bound Tyr        | Free Asn+Asp+Lys+Met+Thr+Ile    | -0.1076       | 0.7674        |
| Protein-bound Tyr        | Free Asn+Asp+Lys+Thr+Ile        | -0.1077       | 0.7671        |
| Protein-bound Tyr        | Free Asp                        | -0.2496       | 0.4868        |
| Protein-bound Tyr        | Free Asp+Lys+Met+Thr+Ile        | -0.0983       | 0.7870        |
| Protein-bound Tyr        | Free Cys                        | -0.2080       | 0.5642        |
| Protein-bound Tyr        | Free Gln                        | -0.2073       | 0.5655        |
| Protein-bound Tyr        | Free Glu                        | -0.2623       | 0.4641        |
| Protein-bound Tyr        | Free Gly                        | -0.1142       | 0.7535        |
| Protein-bound Tyr        | Free Gly/Thr                    | 0.0010        | 0.9979        |
| Protein-bound Tyr        | Free Gly+Ile                    | -0.1095       | 0.7633        |
| Protein-bound Tyr        | Free His                        | -0.0469       | 0.8976        |
| Protein-bound Tyr        | Free Ile                        | 0.0553        | 0.8794        |
| Protein-bound Tyr        | Free Ile/Thr                    | 0.0986        | 0.7865        |
| Protein-bound Tyr        | Free Leu                        | -0.0836       | 0.8185        |
| Protein-bound Tyr        | Free Lys                        | -0.2191       | 0.5431        |
| Protein-bound Tyr        | Free Lys/(Met+Thr+Ile)          | 0.0321        | 0.9298        |
| Protein-bound Tyr        | Free Lys/Asp                    | 0.0204        | 0.9554        |
| Protein-bound Tyr        | Free Lys/Thr                    | 0.0815        | 0.8229        |
| Protein-bound Tyr        | Free Lys+Met+Thr+Ile            | 0.0003        | 0.9994        |

|                          |                                                      |               |               |
|--------------------------|------------------------------------------------------|---------------|---------------|
| Protein-bound Tyr        | Free Met                                             | -0.1744       | 0.6298        |
| Protein-bound Tyr        | Free Met/(Thr+Ile)                                   | -0.0209       | 0.9543        |
| Protein-bound Tyr        | Free Met/Thr                                         | 0.0799        | 0.8264        |
| Protein-bound Tyr        | Free Met+Thr+Ile                                     | 0.0083        | 0.9818        |
| Protein-bound Tyr        | Free Phe                                             | 0.0343        | 0.9250        |
| Protein-bound Tyr        | Free Pro                                             | -0.3068       | 0.3886        |
| Protein-bound Tyr        | Free Ser                                             | -0.1664       | 0.6459        |
| Protein-bound Tyr        | Free Thr                                             | 0.0122        | 0.9734        |
| Protein-bound Tyr        | Free Thr/(Gly+Ile)                                   | 0.0409        | 0.9106        |
| Protein-bound Tyr        | Free Thr/Asp                                         | 0.2168        | 0.5475        |
| Protein-bound Tyr        | Free Trp                                             | 0.0484        | 0.8943        |
| Protein-bound Tyr        | Free Tyr                                             | -0.0197       | 0.9569        |
| Protein-bound Tyr        | Free Val                                             | 0.3404        | 0.3358        |
| Protein-bound Tyr        | HSDH activity with four effectors                    | -0.1602       | 0.6584        |
| Protein-bound Tyr        | HSDH activity without effectors                      | -0.0340       | 0.9256        |
| Protein-bound Tyr        | <i>LKR-SDHI</i>                                      | -0.2408       | 0.5028        |
| Protein-bound Tyr        | Lys-sensitive AK activity                            | 0.2294        | 0.5238        |
| Protein-bound Tyr        | Lys-sensitive AK activity/Thr-sensitive AK activity  | -0.2717       | 0.4476        |
| Protein-bound Tyr        | Protein-bound Ala                                    | 0.7190        | 0.0191        |
| Protein-bound Tyr        | Protein-bound Arg                                    | 0.1815        | 0.6158        |
| <b>Protein-bound Tyr</b> | <b>Protein-bound Gly</b>                             | <b>0.6333</b> | <b>0.0493</b> |
| <b>Protein-bound Tyr</b> | <b>Protein-bound His</b>                             | <b>0.5423</b> | <b>0.1054</b> |
| Protein-bound Tyr        | Protein-bound Ile                                    | 0.2436        | 0.4976        |
| <b>Protein-bound Tyr</b> | <b>Protein-bound Leu</b>                             | <b>0.6085</b> | <b>0.0619</b> |
| <b>Protein-bound Tyr</b> | <b>Protein-bound Lys</b>                             | <b>0.4266</b> | <b>0.2189</b> |
| Protein-bound Tyr        | Protein-bound Phe                                    | 0.3779        | 0.2816        |
| <b>Protein-bound Tyr</b> | <b>Protein-bound Pro</b>                             | <b>0.6402</b> | <b>0.0462</b> |
| <b>Protein-bound Tyr</b> | <b>Protein-bound Ser</b>                             | <b>0.8506</b> | <b>0.0018</b> |
| <b>Protein-bound Tyr</b> | <b>Protein-bound Thr</b>                             | <b>0.7308</b> | <b>0.0163</b> |
| Protein-bound Tyr        | <i>SAMS1</i>                                         | 0.0521        | 0.8862        |
| Protein-bound Tyr        | <i>SAMS2</i>                                         | 0.0970        | 0.7898        |
| Protein-bound Tyr        | <i>SAMS3</i>                                         | 0.3202        | 0.3671        |
| <b>Protein-bound Tyr</b> | <b><i>SAMS4</i></b>                                  | <b>0.4822</b> | <b>0.1582</b> |
| Protein-bound Tyr        | <i>SAMSs</i>                                         | 0.3390        | 0.3380        |
| Protein-bound Tyr        | <i>TD1</i>                                           | 0.2198        | 0.5417        |
| Protein-bound Tyr        | <i>TD1/BCAT1</i>                                     | -0.3237       | 0.3616        |
| Protein-bound Tyr        | <i>THA1</i>                                          | -0.1907       | 0.5977        |
| Protein-bound Tyr        | <i>THA2</i>                                          | 0.0410        | 0.9104        |
| Protein-bound Tyr        | <i>THAs</i>                                          | 0.0349        | 0.9237        |
| Protein-bound Tyr        | <i>THAs+TD1</i>                                      | 0.2199        | 0.5416        |
| <b>Protein-bound Tyr</b> | <b>Thr-sensitive AK activity</b>                     | <b>0.7326</b> | <b>0.0160</b> |
| Protein-bound Tyr        | Total free AAs                                       | -0.2167       | 0.5475        |
| <b>Protein-bound Tyr</b> | <b><i>TSI</i></b>                                    | <b>0.5006</b> | <b>0.1406</b> |
| Protein-bound Tyr        | <i>TSI/(THAs+TD1)</i>                                | 0.1923        | 0.5946        |
| Protein-bound Tyr        | <i>TSI/TD1</i>                                       | 0.0099        | 0.9784        |
| Protein-bound Tyr        | <i>TSI/THAs</i>                                      | 0.1253        | 0.7301        |
| Protein-bound Val        | <i>(AK-HSDHs+CGS1)/SAMSs</i>                         | 0.3460        | 0.3274        |
| Protein-bound Val        | <i>(AK-HSDHs+TSI)/(THAs+TD1)</i>                     | 0.2665        | 0.4567        |
| Protein-bound Val        | <i>(AK-HSDHs+TSI+TD1)/BCAT1</i>                      | -0.0376       | 0.9178        |
| Protein-bound Val        | <i>(AKs+AK-HSDHs)/AK-HSDHs</i>                       | 0.1597        | 0.6595        |
| Protein-bound Val        | <i>(AKs+AK-HSDHs+CGS1)/SAMSs</i>                     | 0.2405        | 0.5034        |
| Protein-bound Val        | <i>(AKs+AK-HSDHs+DHDPSs)/LKR-SDHI</i>                | 0.3155        | 0.3745        |
| <b>Protein-bound Val</b> | <b><i>(AKs+AK-HSDHs+TSI)/(THAs+TD1)</i></b>          | <b>0.4035</b> | <b>0.2476</b> |
| Protein-bound Val        | <i>(AKs+AK-HSDHs+TSI+TD1)/BCAT1</i>                  | -0.0289       | 0.9369        |
| <b>Protein-bound Val</b> | <b><i>(AKs+DHDPSs)/LKR-SDHI</i></b>                  | <b>0.4183</b> | <b>0.2290</b> |
| <b>Protein-bound Val</b> | <b>AK activity with four effectors</b>               | <b>0.5176</b> | <b>0.1254</b> |
| <b>Protein-bound Val</b> | <b>AK activity without effectors</b>                 | <b>0.6148</b> | <b>0.0586</b> |
| <b>Protein-bound Val</b> | <b>AK activity/HSDH activity with four effectors</b> | <b>0.5690</b> | <b>0.0861</b> |

|                          |                                                    |                |               |
|--------------------------|----------------------------------------------------|----------------|---------------|
| <b>Protein-bound Val</b> | <b>AK activity/HSDH activity without effectors</b> | <b>0.4731</b>  | <b>0.1673</b> |
| <b>Protein-bound Val</b> | <b>AK1</b>                                         | <b>-0.4701</b> | <b>0.1704</b> |
| Protein-bound Val        | AK1+AK2                                            | 0.3141         | 0.3767        |
| <b>Protein-bound Val</b> | <b>AK1+AK3</b>                                     | <b>-0.6943</b> | <b>0.0259</b> |
| <b>Protein-bound Val</b> | <b>AK2</b>                                         | <b>0.4006</b>  | <b>0.2514</b> |
| Protein-bound Val        | AK2+AK3                                            | 0.3304         | 0.3511        |
| Protein-bound Val        | AK3                                                | -0.3338        | 0.3459        |
| Protein-bound Val        | AK-HSDH1                                           | 0.0325         | 0.9289        |
| Protein-bound Val        | AK-HSDH2                                           | -0.2674        | 0.4551        |
| Protein-bound Val        | AK-HSDHs                                           | -0.1550        | 0.6690        |
| Protein-bound Val        | AK-HSDHs+CGS1                                      | 0.0268         | 0.9413        |
| Protein-bound Val        | AK-HSDHs+TS1                                       | -0.0391        | 0.9146        |
| Protein-bound Val        | AK-HSDHs+TS1+TD1                                   | -0.0739        | 0.8392        |
| Protein-bound Val        | AK-HSDHs+TS1+THAs                                  | -0.0325        | 0.9289        |
| Protein-bound Val        | AKs                                                | 0.2469         | 0.4917        |
| Protein-bound Val        | AKs/AK-HSDHs                                       | 0.1597         | 0.6595        |
| Protein-bound Val        | AKs+AK-HSDHs                                       | 0.2145         | 0.5518        |
| Protein-bound Val        | AKs+AK-HSDHs+CGS1                                  | 0.2539         | 0.4791        |
| Protein-bound Val        | AKs+AK-HSDHs+DHDPSs                                | 0.1964         | 0.5866        |
| Protein-bound Val        | AKs+AK-HSDHs+TS1                                   | 0.1769         | 0.6250        |
| Protein-bound Val        | AKs+AK-HSDHs+TS1+TD1                               | 0.1475         | 0.6842        |
| Protein-bound Val        | AKs+AK-HSDHs+TS1+THAs                              | 0.1816         | 0.6156        |
| Protein-bound Val        | AKs+DHDPSs                                         | 0.2295         | 0.5237        |
| <b>Protein-bound Val</b> | <b>BCAT1</b>                                       | <b>0.6035</b>  | <b>0.0647</b> |
| Protein-bound Val        | Biosynthetic genes analyzed                        | 0.1857         | 0.6075        |
| Protein-bound Val        | Catabolic genes analyzed                           | -0.2006        | 0.5784        |
| Protein-bound Val        | CGS1                                               | 0.2191         | 0.5430        |
| Protein-bound Val        | CGS1/SAMSs                                         | 0.3264         | 0.3573        |
| Protein-bound Val        | CGS1/TS1                                           | 0.2026         | 0.5746        |
| <b>Protein-bound Val</b> | <b>DHDPS1</b>                                      | <b>-0.5852</b> | <b>0.0756</b> |
| Protein-bound Val        | DHDPS2                                             | -0.0961        | 0.7918        |
| <b>Protein-bound Val</b> | <b>DHDPSs</b>                                      | <b>-0.4359</b> | <b>0.2080</b> |
| Protein-bound Val        | DHDPSs/AK-HSDHs                                    | -0.0650        | 0.8585        |
| Protein-bound Val        | DHDPSs/LKR-SDH1                                    | -0.0603        | 0.8687        |
| Protein-bound Val        | Free (Lys+Met+Thr+Ile)/Asp                         | 0.3494         | 0.3223        |
| <b>Protein-bound Val</b> | <b>Free Ala</b>                                    | <b>-0.4389</b> | <b>0.2044</b> |
| <b>Protein-bound Val</b> | <b>Free Arg</b>                                    | <b>-0.5146</b> | <b>0.1280</b> |
| <b>Protein-bound Val</b> | <b>Free Asn</b>                                    | <b>-0.6273</b> | <b>0.0522</b> |
| <b>Protein-bound Val</b> | <b>Free Asn+Asp</b>                                | <b>-0.6991</b> | <b>0.0245</b> |
| Protein-bound Val        | Free Asn+Asp+Lys+Met+Thr+Ile                       | -0.3132        | 0.3782        |
| Protein-bound Val        | Free Asn+Asp+Lys+Thr+Ile                           | -0.3127        | 0.3790        |
| <b>Protein-bound Val</b> | <b>Free Asp</b>                                    | <b>-0.7023</b> | <b>0.0236</b> |
| Protein-bound Val        | Free Asp+Lys+Met+Thr+Ile                           | -0.2807        | 0.4320        |
| Protein-bound Val        | Free Cys                                           | -0.2417        | 0.5011        |
| <b>Protein-bound Val</b> | <b>Free Gln</b>                                    | <b>-0.6664</b> | <b>0.0354</b> |
| <b>Protein-bound Val</b> | <b>Free Glu</b>                                    | <b>-0.5642</b> | <b>0.0893</b> |
| <b>Protein-bound Val</b> | <b>Free Gly</b>                                    | <b>-0.6656</b> | <b>0.0357</b> |
| <b>Protein-bound Val</b> | <b>Free Gly/Thr</b>                                | <b>-0.4793</b> | <b>0.1610</b> |
| <b>Protein-bound Val</b> | <b>Free Gly+Ile</b>                                | <b>-0.6654</b> | <b>0.0357</b> |
| <b>Protein-bound Val</b> | <b>Free His</b>                                    | <b>-0.4306</b> | <b>0.2142</b> |
| Protein-bound Val        | Free Ile                                           | -0.1060        | 0.7707        |
| Protein-bound Val        | Free Ile/Thr                                       | -0.2158        | 0.5493        |
| Protein-bound Val        | Free Leu                                           | -0.3896        | 0.2657        |
| Protein-bound Val        | Free Lys                                           | -0.3507        | 0.3204        |
| Protein-bound Val        | Free Lys/(Met+Thr+Ile)                             | -0.2837        | 0.4271        |
| <b>Protein-bound Val</b> | <b>Free Lys/Asp</b>                                | <b>0.5330</b>  | <b>0.1126</b> |
| Protein-bound Val        | Free Lys/Thr                                       | -0.2728        | 0.4457        |
| Protein-bound Val        | Free Lys+Met+Thr+Ile                               | 0.0047         | 0.9898        |



|                          |                                                     |                |               |
|--------------------------|-----------------------------------------------------|----------------|---------------|
| Protein-bound Val        | Free Met                                            | -0.3027        | 0.3953        |
| Protein-bound Val        | Free Met/(Thr+Ile)                                  | -0.3112        | 0.3814        |
| Protein-bound Val        | Free Met/Thr                                        | -0.2749        | 0.4421        |
| Protein-bound Val        | Free Met+Thr+Ile                                    | 0.0175         | 0.9616        |
| Protein-bound Val        | Free Phe                                            | -0.3614        | 0.3048        |
| <b>Protein-bound Val</b> | <b>Free Pro</b>                                     | <b>-0.6288</b> | <b>0.0515</b> |
| <b>Protein-bound Val</b> | <b>Free Ser</b>                                     | <b>-0.7035</b> | <b>0.0232</b> |
| Protein-bound Val        | Free Thr                                            | 0.0223         | 0.9513        |
| Protein-bound Val        | Free Thr/(Gly+Ile)                                  | 0.1580         | 0.6628        |
| Protein-bound Val        | Free Thr/Asp                                        | 0.3280         | 0.3549        |
| Protein-bound Val        | Free Trp                                            | -0.3609        | 0.3055        |
| Protein-bound Val        | Free Tyr                                            | -0.1264        | 0.7278        |
| Protein-bound Val        | Free Val                                            | -0.2145        | 0.5518        |
| Protein-bound Val        | HSDH activity with four effectors                   | -0.1780        | 0.6227        |
| Protein-bound Val        | HSDH activity without effectors                     | -0.0377        | 0.9176        |
| Protein-bound Val        | <i>LKR-SDH1</i>                                     | -0.2029        | 0.5741        |
| <b>Protein-bound Val</b> | <b>Lys-sensitive AK activity</b>                    | <b>0.6940</b>  | <b>0.0260</b> |
| Protein-bound Val        | Lys-sensitive AK activity/Thr-sensitive AK activity | 0.0068         | 0.9850        |
| Protein-bound Val        | Protein-bound Ala                                   | 0.2421         | 0.5003        |
| <b>Protein-bound Val</b> | <b>Protein-bound Arg</b>                            | <b>0.4695</b>  | <b>0.1710</b> |
| Protein-bound Val        | Protein-bound Gly                                   | 0.3144         | 0.3763        |
| <b>Protein-bound Val</b> | <b>Protein-bound His</b>                            | <b>0.6006</b>  | <b>0.0663</b> |
| <b>Protein-bound Val</b> | <b>Protein-bound Ile</b>                            | <b>0.6772</b>  | <b>0.0315</b> |
| <b>Protein-bound Val</b> | <b>Protein-bound Leu</b>                            | <b>0.5187</b>  | <b>0.1245</b> |
| <b>Protein-bound Val</b> | <b>Protein-bound Lys</b>                            | <b>0.4276</b>  | <b>0.2177</b> |
| Protein-bound Val        | Protein-bound Phe                                   | 0.3245         | 0.3604        |
| Protein-bound Val        | Protein-bound Pro                                   | 0.2141         | 0.5526        |
| <b>Protein-bound Val</b> | <b>Protein-bound Ser</b>                            | <b>0.4625</b>  | <b>0.1783</b> |
| Protein-bound Val        | Protein-bound Thr                                   | 0.2164         | 0.5481        |
| <b>Protein-bound Val</b> | <b>Protein-bound Tyr</b>                            | <b>0.5436</b>  | <b>0.1044</b> |
| <b>Protein-bound Val</b> | <b><i>SAMS1</i></b>                                 | <b>-0.4695</b> | <b>0.1709</b> |
| <b>Protein-bound Val</b> | <b><i>SAMS2</i></b>                                 | <b>-0.4532</b> | <b>0.1884</b> |
| Protein-bound Val        | <i>SAMS3</i>                                        | -0.0094        | 0.9795        |
| Protein-bound Val        | <i>SAMS4</i>                                        | -0.1159        | 0.7499        |
| Protein-bound Val        | <i>SAMSs</i>                                        | -0.2025        | 0.5748        |
| Protein-bound Val        | <i>TD1</i>                                          | -0.3776        | 0.2820        |
| Protein-bound Val        | <i>TD1/BCAT1</i>                                    | -0.0850        | 0.8155        |
| Protein-bound Val        | <i>THA1</i>                                         | -0.0591        | 0.8712        |
| Protein-bound Val        | <i>THA2</i>                                         | 0.3441         | 0.3302        |
| Protein-bound Val        | <i>THAs</i>                                         | 0.3275         | 0.3556        |
| Protein-bound Val        | <i>THAs+TD1</i>                                     | -0.3031        | 0.3946        |
| Protein-bound Val        | Thr-sensitive AK activity                           | 0.2723         | 0.4466        |
| <b>Protein-bound Val</b> | <b>Total free AAs</b>                               | <b>-0.6693</b> | <b>0.0343</b> |
| Protein-bound Val        | <i>TS1</i>                                          | 0.0180         | 0.9607        |
| Protein-bound Val        | <i>TS1/(THAs+TD1)</i>                               | 0.3930         | 0.2613        |
| Protein-bound Val        | <i>TS1/TD1</i>                                      | 0.2785         | 0.4359        |
| <b>Protein-bound Val</b> | <b><i>TS1/THAs</i></b>                              | <b>-0.5462</b> | <b>0.1023</b> |
| <i>SAMS1</i>             | <i>AK1</i>                                          | -0.2895        | 0.4171        |
| <i>SAMS1</i>             | <i>AK2</i>                                          | -0.2506        | 0.4850        |
| <i>SAMS1</i>             | <i>AK3</i>                                          | 0.3812         | 0.2771        |
| <i>SAMS1</i>             | <i>AK-HSDH1</i>                                     | -0.0943        | 0.7954        |
| <i>SAMS1</i>             | <i>AK-HSDH2</i>                                     | <b>0.4696</b>  | <b>0.1709</b> |
| <i>SAMS1</i>             | <i>CGS1</i>                                         | 0.3836         | 0.2738        |
| <i>SAMS1</i>             | <i>DHDPS1</i>                                       | <b>0.4308</b>  | <b>0.2139</b> |
| <i>SAMS1</i>             | <i>DHDPS2</i>                                       | <b>0.5942</b>  | <b>0.0701</b> |
| <i>SAMS1</i>             | <i>LKR-SDH1</i>                                     | -0.0395        | 0.9136        |
| <i>SAMS1</i>             | <i>TD1</i>                                          | <b>0.8548</b>  | <b>0.0016</b> |
| <i>SAMS1</i>             | <i>TS1</i>                                          | 0.3250         | 0.3595        |

|       |              |                |                  |
|-------|--------------|----------------|------------------|
| SAMS2 | AK1          | -0.2392        | 0.5056           |
| SAMS2 | AK2          | 0.1193         | 0.7427           |
| SAMS2 | AK3          | 0.3721         | 0.2897           |
| SAMS2 | AK-HSDH1     | -0.0104        | 0.9773           |
| SAMS2 | AK-HSDH2     | 0.2592         | 0.4695           |
| SAMS2 | CGS1         | 0.2819         | 0.4301           |
| SAMS2 | DHDPS1       | <b>0.8453</b>  | <b>0.0021</b>    |
| SAMS2 | DHDPS2       | <b>0.5009</b>  | <b>0.1403</b>    |
| SAMS2 | LKR-SDH1     | 0.3349         | 0.3442           |
| SAMS2 | SAMS1        | <b>0.7006</b>  | <b>0.0240</b>    |
| SAMS2 | TD1          | <b>0.8706</b>  | <b>0.0010</b>    |
| SAMS2 | TS1          | <b>0.6964</b>  | <b>0.0253</b>    |
| SAMS3 | AK1          | 0.3539         | 0.3158           |
| SAMS3 | AK2          | -0.3061        | 0.3896           |
| SAMS3 | AK3          | -0.1379        | 0.7040           |
| SAMS3 | AK-HSDH1     | <b>0.7316</b>  | <b>0.0162</b>    |
| SAMS3 | AK-HSDH2     | <b>0.6560</b>  | <b>0.0394</b>    |
| SAMS3 | CGS1         | <b>0.5249</b>  | <b>0.1193</b>    |
| SAMS3 | DHDPS1       | -0.1945        | 0.5902           |
| SAMS3 | DHDPS2       | <b>0.6329</b>  | <b>0.0495</b>    |
| SAMS3 | LKR-SDH1     | <b>-0.8280</b> | <b>0.0031</b>    |
| SAMS3 | SAMS1        | 0.0698         | 0.8480           |
| SAMS3 | SAMS2        | -0.0442        | 0.9034           |
| SAMS3 | TD1          | 0.3135         | 0.3778           |
| SAMS3 | TS1          | 0.3891         | 0.2664           |
| SAMS4 | AK1          | -0.1009        | 0.7816           |
| SAMS4 | AK2          | -0.2734        | 0.4447           |
| SAMS4 | AK3          | 0.2312         | 0.5204           |
| SAMS4 | AK-HSDH1     | <b>0.6069</b>  | <b>0.0628</b>    |
| SAMS4 | AK-HSDH2     | <b>0.7864</b>  | <b>0.0070</b>    |
| SAMS4 | CGS1         | <b>0.7356</b>  | <b>0.0153</b>    |
| SAMS4 | DHDPS1       | 0.0676         | 0.8529           |
| SAMS4 | DHDPS2       | <b>0.8838</b>  | <b>0.0007</b>    |
| SAMS4 | LKR-SDH1     | <b>-0.6520</b> | <b>0.0411</b>    |
| SAMS4 | SAMS1        | <b>0.5837</b>  | <b>0.0765</b>    |
| SAMS4 | SAMS2        | <b>0.4366</b>  | <b>0.2071</b>    |
| SAMS4 | SAMS3        | <b>0.7843</b>  | <b>0.0072</b>    |
| SAMS4 | TD1          | <b>0.7684</b>  | <b>0.0094</b>    |
| SAMS4 | TS1          | <b>0.6848</b>  | <b>0.0289</b>    |
| SAMSs | AK1          | 0.1280         | 0.7245           |
| SAMSs | AK2          | -0.3540        | 0.3156           |
| SAMSs | AK3          | 0.0861         | 0.8132           |
| SAMSs | AK-HSDH1     | <b>0.6031</b>  | <b>0.0649</b>    |
| SAMSs | AK-HSDH2     | <b>0.7847</b>  | <b>0.0072</b>    |
| SAMSs | AK-HSDHs     | <b>0.8501</b>  | <b>0.0018</b>    |
| SAMSs | AKs          | -0.3191        | 0.3689           |
| SAMSs | AKs+AK-HSDHs | -0.1062        | 0.7703           |
| SAMSs | BCAT1        | -0.2747        | 0.4424           |
| SAMSs | CGS1         | <b>0.6521</b>  | <b>0.0410</b>    |
| SAMSs | DHDPS1       | 0.0434         | 0.9052           |
| SAMSs | DHDPS2       | <b>0.8353</b>  | <b>0.0026</b>    |
| SAMSs | DHDPSs       | <b>0.6161</b>  | <b>0.0578</b>    |
| SAMSs | LKR-SDH1     | <b>-0.7190</b> | <b>0.0191</b>    |
| SAMSs | SAMS1        | <b>0.5227</b>  | <b>0.1211</b>    |
| SAMSs | SAMS2        | 0.3170         | 0.3722           |
| SAMSs | SAMS3        | <b>0.8842</b>  | <b>0.0007</b>    |
| SAMSs | SAMS4        | <b>0.9601</b>  | <b>&lt;.0001</b> |

|                  |                                |                |               |
|------------------|--------------------------------|----------------|---------------|
| <b>SAMSs</b>     | <b>TD1</b>                     | <b>0.6849</b>  | <b>0.0289</b> |
| <b>SAMSs</b>     | <b>THA1</b>                    | <b>-0.6945</b> | <b>0.0258</b> |
| SAMSs            | THA2                           | -0.2444        | 0.4961        |
| <b>SAMSs</b>     | <b>TS1</b>                     | <b>0.5352</b>  | <b>0.1109</b> |
| TD1              | AK1                            | -0.2114        | 0.5577        |
| TD1              | AK2                            | -0.0076        | 0.9833        |
| TD1              | AK3                            | 0.3489         | 0.3231        |
| TD1              | AK-HSDH1                       | 0.1391         | 0.7016        |
| <b>TD1</b>       | <b>AK-HSDH2</b>                | <b>0.6214</b>  | <b>0.0552</b> |
| <b>TD1</b>       | <b>CGS1</b>                    | <b>0.5458</b>  | <b>0.1027</b> |
| <b>TD1</b>       | <b>DHDPS1</b>                  | <b>0.5828</b>  | <b>0.0770</b> |
| <b>TD1</b>       | <b>DHDPS2</b>                  | <b>0.8171</b>  | <b>0.0039</b> |
| <b>TD1</b>       | <b>TS1</b>                     | <b>0.7059</b>  | <b>0.0225</b> |
| TD1/BCAT1        | (AK-HSDHs+CGS1)/SAMSs          | 0.2145         | 0.5518        |
| TD1/BCAT1        | (AK-HSDHs+TS1)/(THAs+TD1)      | -0.1662        | 0.6463        |
| TD1/BCAT1        | (AKs+AK-HSDHs)/AK-HSDHs        | -0.2397        | 0.5048        |
| TD1/BCAT1        | (AKs+AK-HSDHs+CGS1)/SAMSs      | -0.0315        | 0.9312        |
| TD1/BCAT1        | (AKs+AK-HSDHs+DHDPSs)/LKR-SDH1 | 0.1980         | 0.5836        |
| TD1/BCAT1        | (AKs+AK-HSDHs+TS1)/(THAs+TD1)  | -0.2237        | 0.5344        |
| TD1/BCAT1        | (AKs+DHDPSs)/LKR-SDH1          | 0.1819         | 0.6150        |
| TD1/BCAT1        | AK1                            | 0.0887         | 0.8075        |
| TD1/BCAT1        | AK1+AK2                        | 0.1722         | 0.6343        |
| TD1/BCAT1        | AK1+AK3                        | -0.3192        | 0.3687        |
| TD1/BCAT1        | AK2                            | 0.1481         | 0.6831        |
| TD1/BCAT1        | AK2+AK3                        | 0.0561         | 0.8777        |
| <b>TD1/BCAT1</b> | <b>AK3</b>                     | <b>-0.5029</b> | <b>0.1385</b> |
| TD1/BCAT1        | AK-HSDH1                       | 0.0358         | 0.9217        |
| <b>TD1/BCAT1</b> | <b>AK-HSDH2</b>                | <b>0.4258</b>  | <b>0.2198</b> |
| TD1/BCAT1        | AK-HSDHs                       | 0.3040         | 0.3931        |
| <b>TD1/BCAT1</b> | <b>AK-HSDHs+CGS1</b>           | <b>0.4658</b>  | <b>0.1748</b> |
| <b>TD1/BCAT1</b> | <b>AK-HSDHs+TS1</b>            | <b>0.4056</b>  | <b>0.2449</b> |
| <b>TD1/BCAT1</b> | <b>AK-HSDHs+TS1+TD1</b>        | <b>0.4138</b>  | <b>0.2346</b> |
| <b>TD1/BCAT1</b> | <b>AK-HSDHs+TS1+THAs</b>       | <b>0.4083</b>  | <b>0.2414</b> |
| TD1/BCAT1        | AKs                            | 0.0776         | 0.8314        |
| TD1/BCAT1        | AKs/AK-HSDHs                   | -0.2397        | 0.5048        |
| TD1/BCAT1        | AKs+AK-HSDHs                   | 0.1606         | 0.6576        |
| TD1/BCAT1        | AKs+AK-HSDHs+CGS1              | 0.2778         | 0.4371        |
| TD1/BCAT1        | AKs+AK-HSDHs+DHDPSs            | 0.1800         | 0.6189        |
| TD1/BCAT1        | AKs+AK-HSDHs+TS1               | 0.3136         | 0.3776        |
| TD1/BCAT1        | AKs+AK-HSDHs+TS1+TD1           | 0.3276         | 0.3554        |
| TD1/BCAT1        | AKs+AK-HSDHs+TS1+THAs          | 0.3128         | 0.3788        |
| TD1/BCAT1        | AKs+DHDPSs                     | 0.0993         | 0.7848        |
| <b>TD1/BCAT1</b> | <b>BCAT1</b>                   | <b>-0.5344</b> | <b>0.1115</b> |
| TD1/BCAT1        | Biosynthetic genes analyzed    | 0.3928         | 0.2615        |
| TD1/BCAT1        | Catabolic genes analyzed       | 0.2680         | 0.4540        |
| <b>TD1/BCAT1</b> | <b>CGS1</b>                    | <b>0.5507</b>  | <b>0.0990</b> |
| TD1/BCAT1        | CGS1/SAMSs                     | 0.0319         | 0.9303        |
| TD1/BCAT1        | DHDPS1                         | 0.3264         | 0.3573        |
| <b>TD1/BCAT1</b> | <b>DHDPS2</b>                  | <b>0.5140</b>  | <b>0.1285</b> |
| <b>TD1/BCAT1</b> | <b>DHDPSs</b>                  | <b>0.5331</b>  | <b>0.1126</b> |
| TD1/BCAT1        | DHDPSs/LKR-SDH1                | 0.3954         | 0.2580        |
| TD1/BCAT1        | LKR-SDH1                       | -0.2622        | 0.4642        |
| TD1/BCAT1        | SAMS1                          | 0.2474         | 0.4908        |
| TD1/BCAT1        | SAMS2                          | 0.2917         | 0.4135        |
| TD1/BCAT1        | SAMS3                          | 0.1845         | 0.6098        |
| TD1/BCAT1        | SAMS4                          | 0.2393         | 0.5054        |
| TD1/BCAT1        | SAMSs                          | 0.2692         | 0.4520        |

|                         |                            |                |               |
|-------------------------|----------------------------|----------------|---------------|
| <i>TD1/BCAT1</i>        | <i>TD1</i>                 | 0.3848         | 0.2722        |
| <i>TD1/BCAT1</i>        | <i>THA1</i>                | -0.2797        | 0.4338        |
| <i>TD1/BCAT1</i>        | <i>THA2</i>                | 0.2099         | 0.5605        |
| <i>TD1/BCAT1</i>        | <i>THAs</i>                | 0.1771         | 0.6246        |
| <b><i>TD1/BCAT1</i></b> | <b><i>THAs+TD1</i></b>     | <b>0.4086</b>  | <b>0.2411</b> |
| <i>TD1/BCAT1</i>        | <i>TS1</i>                 | 0.3990         | 0.2534        |
| <i>TD1/BCAT1</i>        | <i>TS1/(THAs+TD1)</i>      | -0.2167        | 0.5476        |
| <i>TD1/BCAT1</i>        | <i>TS1/TD1</i>             | -0.2972        | 0.4044        |
| <i>TD1/BCAT1</i>        | <i>TS1/THAs</i>            | 0.2051         | 0.5697        |
| <i>THA1</i>             | <i>AK1</i>                 | -0.1408        | 0.6981        |
| <i>THA1</i>             | <i>AK2</i>                 | -0.0187        | 0.9591        |
| <i>THA1</i>             | <i>AK3</i>                 | 0.0085         | 0.9815        |
| <i>THA1</i>             | <i>AK-HSDH1</i>            | -0.2561        | 0.4752        |
| <b><i>THA1</i></b>      | <b><i>AK-HSDH2</i></b>     | <b>-0.6294</b> | <b>0.0512</b> |
| <b><i>THA1</i></b>      | <b><i>CGS1</i></b>         | <b>-0.7264</b> | <b>0.0174</b> |
| <i>THA1</i>             | <i>DHDPS1</i>              | 0.2970         | 0.4047        |
| <b><i>THA1</i></b>      | <b><i>DHDPS2</i></b>       | <b>-0.5938</b> | <b>0.0703</b> |
| <b><i>THA1</i></b>      | <b><i>LKR-SDH1</i></b>     | <b>0.7715</b>  | <b>0.0090</b> |
| <i>THA1</i>             | <i>SAMS1</i>               | -0.1744        | 0.6300        |
| <i>THA1</i>             | <i>SAMS2</i>               | -0.0077        | 0.9831        |
| <b><i>THA1</i></b>      | <b><i>SAMS3</i></b>        | <b>-0.7204</b> | <b>0.0188</b> |
| <b><i>THA1</i></b>      | <b><i>SAMS4</i></b>        | <b>-0.6378</b> | <b>0.0473</b> |
| <i>THA1</i>             | <i>TD1</i>                 | -0.3286        | 0.3539        |
| <i>THA1</i>             | <i>TS1</i>                 | -0.2839        | 0.4267        |
| <b><i>THA2</i></b>      | <b><i>AK1</i></b>          | <b>-0.5485</b> | <b>0.1006</b> |
| <b><i>THA2</i></b>      | <b><i>AK2</i></b>          | <b>0.5699</b>  | <b>0.0855</b> |
| <i>THA2</i>             | <i>AK3</i>                 | -0.0360        | 0.9213        |
| <i>THA2</i>             | <i>AK-HSDH1</i>            | -0.1918        | 0.5956        |
| <i>THA2</i>             | <i>AK-HSDH2</i>            | -0.2811        | 0.4315        |
| <b><i>THA2</i></b>      | <b><i>CGS1</i></b>         | <b>0.4047</b>  | <b>0.2460</b> |
| <i>THA2</i>             | <i>DHDPS1</i>              | 0.1607         | 0.6573        |
| <i>THA2</i>             | <i>DHDPS2</i>              | -0.1055        | 0.7718        |
| <i>THA2</i>             | <i>LKR-SDH1</i>            | 0.2405         | 0.5032        |
| <i>THA2</i>             | <i>SAMS1</i>               | -0.0547        | 0.8808        |
| <i>THA2</i>             | <i>SAMS2</i>               | 0.3112         | 0.3815        |
| <i>THA2</i>             | <i>SAMS3</i>               | -0.2948        | 0.4083        |
| <i>THA2</i>             | <i>SAMS4</i>               | -0.1184        | 0.7446        |
| <i>THA2</i>             | <i>TD1</i>                 | 0.0908         | 0.8029        |
| <i>THA2</i>             | <i>THA1</i>                | -0.1650        | 0.6488        |
| <i>THA2</i>             | <i>TS1</i>                 | 0.3127         | 0.3790        |
| <b><i>THAs</i></b>      | <b><i>AK1</i></b>          | <b>-0.5194</b> | <b>0.1239</b> |
| <b><i>THAs</i></b>      | <b><i>AK2</i></b>          | <b>0.6385</b>  | <b>0.0469</b> |
| <i>THAs</i>             | <i>AK3</i>                 | -0.0082        | 0.9820        |
| <i>THAs</i>             | <i>AK-HSDH1</i>            | -0.3040        | 0.3931        |
| <i>THAs</i>             | <i>AK-HSDH2</i>            | -0.3393        | 0.3375        |
| <i>THAs</i>             | <i>AK-HSDHs</i>            | -0.3898        | 0.2655        |
| <b><i>THAs</i></b>      | <b><i>AKs</i></b>          | <b>0.5391</b>  | <b>0.1079</b> |
| <b><i>THAs</i></b>      | <b><i>AKs+AK-HSDHs</i></b> | <b>0.4569</b>  | <b>0.1843</b> |
| <i>THAs</i>             | <i>BCAT1</i>               | -0.1238        | 0.7334        |
| <i>THAs</i>             | <i>CGS1</i>                | 0.2937         | 0.4102        |
| <i>THAs</i>             | <i>DHDPS1</i>              | 0.2217         | 0.5381        |
| <i>THAs</i>             | <i>DHDPS2</i>              | -0.1442        | 0.6910        |
| <i>THAs</i>             | <i>DHDPSs</i>              | 0.0116         | 0.9745        |
| <i>THAs</i>             | <i>LKR-SDH1</i>            | 0.3631         | 0.3024        |
| <i>THAs</i>             | <i>SAMS1</i>               | -0.0752        | 0.8364        |
| <i>THAs</i>             | <i>SAMS2</i>               | 0.3395         | 0.3372        |
| <i>THAs</i>             | <i>SAMS3</i>               | -0.3988        | 0.2536        |

|                                  |                                               |                |                  |
|----------------------------------|-----------------------------------------------|----------------|------------------|
| <i>THAs</i>                      | <i>SAMS4</i>                                  | -0.2084        | 0.5635           |
| <i>THAs</i>                      | <i>SAMSs</i>                                  | -0.3420        | 0.3334           |
| <i>THAs</i>                      | <i>TD1</i>                                    | 0.0734         | 0.8403           |
| <i>THAs</i>                      | <i>THA1</i>                                   | -0.0776        | 0.8313           |
| <b><i>THAs</i></b>               | <b><i>THA2</i></b>                            | <b>0.9853</b>  | <b>&lt;.0001</b> |
| <i>THAs</i>                      | <i>TS1</i>                                    | 0.2878         | 0.4201           |
| <i>THAs+TD1</i>                  | <i>AK1</i>                                    | -0.3078        | 0.3870           |
| <i>THAs+TD1</i>                  | <i>AK2</i>                                    | 0.1058         | 0.7711           |
| <i>THAs+TD1</i>                  | <i>AK3</i>                                    | 0.3295         | 0.3526           |
| <i>THAs+TD1</i>                  | <i>AK-HSDH1</i>                               | 0.0907         | 0.8032           |
| <b><i>THAs+TD1</i></b>           | <b><i>AK-HSDH2</i></b>                        | <b>0.5287</b>  | <b>0.1161</b>    |
| <i>THAs+TD1</i>                  | <i>AK-HSDHs</i>                               | 0.3962         | 0.2570           |
| <i>THAs+TD1</i>                  | <i>AKs</i>                                    | 0.1017         | 0.7798           |
| <i>THAs+TD1</i>                  | <i>AKs+AK-HSDHs</i>                           | 0.2108         | 0.5587           |
| <b><i>THAs+TD1</i></b>           | <b><i>BCAT1</i></b>                           | <b>-0.7561</b> | <b>0.0114</b>    |
| <b><i>THAs+TD1</i></b>           | <b>Biosynthetic genes analyzed</b>            | <b>0.5924</b>  | <b>0.0711</b>    |
| <b><i>THAs+TD1</i></b>           | <b>Catabolic genes analyzed</b>               | <b>0.6011</b>  | <b>0.0661</b>    |
| <b><i>THAs+TD1</i></b>           | <b><i>CGS1</i></b>                            | <b>0.5880</b>  | <b>0.0738</b>    |
| <b><i>THAs+TD1</i></b>           | <b><i>DHDPS1</i></b>                          | <b>0.6121</b>  | <b>0.0600</b>    |
| <b><i>THAs+TD1</i></b>           | <b><i>DHDPS2</i></b>                          | <b>0.7578</b>  | <b>0.0111</b>    |
| <b><i>THAs+TD1</i></b>           | <b><i>DHDPSs</i></b>                          | <b>0.8914</b>  | <b>0.0005</b>    |
| <i>THAs+TD1</i>                  | <i>LKR-SDHI</i>                               | -0.0329        | 0.9282           |
| <b><i>THAs+TD1</i></b>           | <b><i>SAMS1</i></b>                           | <b>0.8094</b>  | <b>0.0046</b>    |
| <b><i>THAs+TD1</i></b>           | <b><i>SAMS2</i></b>                           | <b>0.9108</b>  | <b>0.0002</b>    |
| <i>THAs+TD1</i>                  | <i>SAMS3</i>                                  | 0.2282         | 0.5260           |
| <b><i>THAs+TD1</i></b>           | <b><i>SAMS4</i></b>                           | <b>0.7045</b>  | <b>0.0229</b>    |
| <b><i>THAs+TD1</i></b>           | <b><i>SAMSs</i></b>                           | <b>0.5972</b>  | <b>0.0683</b>    |
| <b><i>THAs+TD1</i></b>           | <b><i>TD1</i></b>                             | <b>0.9802</b>  | <b>&lt;.0001</b> |
| <i>THAs+TD1</i>                  | <i>THA1</i>                                   | -0.3278        | 0.3551           |
| <i>THAs+TD1</i>                  | <i>THA2</i>                                   | 0.2839         | 0.4266           |
| <i>THAs+TD1</i>                  | <i>THAs</i>                                   | 0.2679         | 0.4542           |
| <b><i>THAs+TD1</i></b>           | <b><i>TS1</i></b>                             | <b>0.7461</b>  | <b>0.0132</b>    |
| Thr-sensitive AK activity        | <i>(AK-HSDHs+CGS1)/SAMSs</i>                  | -0.1450        | 0.6894           |
| Thr-sensitive AK activity        | <i>(AK-HSDHs+TS1)/(THAs+TD1)</i>              | 0.3507         | 0.3204           |
| Thr-sensitive AK activity        | <i>(AK-HSDHs+TS1+TD1)/BCAT1</i>               | -0.1165        | 0.7487           |
| <b>Thr-sensitive AK activity</b> | <b><i>(AKs+AK-HSDHs)/AK-HSDHs</i></b>         | <b>-0.6731</b> | <b>0.0329</b>    |
| <b>Thr-sensitive AK activity</b> | <b><i>(AKs+AK-HSDHs+CGS1)/SAMSs</i></b>       | <b>-0.5630</b> | <b>0.0901</b>    |
| Thr-sensitive AK activity        | <i>(AKs+AK-HSDHs+DHDPSs)/LKR-SDHI</i>         | 0.2151         | 0.5506           |
| Thr-sensitive AK activity        | <i>(AKs+AK-HSDHs+TS1)/(THAs+TD1)</i>          | -0.0105        | 0.9770           |
| Thr-sensitive AK activity        | <i>(AKs+AK-HSDHs+TS1+TD1)/BCAT1</i>           | -0.1405        | 0.6986           |
| Thr-sensitive AK activity        | <i>(AKs+DHDPSs)/LKR-SDHI</i>                  | 0.0685         | 0.8509           |
| Thr-sensitive AK activity        | AK activity with four effectors               | -0.0753        | 0.8363           |
| Thr-sensitive AK activity        | AK activity without effectors                 | -0.0301        | 0.9343           |
| Thr-sensitive AK activity        | AK activity/HSDH activity with four effectors | -0.2141        | 0.5526           |
| Thr-sensitive AK activity        | AK activity/HSDH activity without effectors   | -0.2429        | 0.4990           |
| Thr-sensitive AK activity        | <i>AK1</i>                                    | -0.2532        | 0.4803           |
| <b>Thr-sensitive AK activity</b> | <b><i>AK1+AK2</i></b>                         | <b>-0.5023</b> | <b>0.1390</b>    |
| Thr-sensitive AK activity        | <i>AK1+AK3</i>                                | -0.1250        | 0.7308           |
| <b>Thr-sensitive AK activity</b> | <b><i>AK2</i></b>                             | <b>-0.4321</b> | <b>0.2124</b>    |
| Thr-sensitive AK activity        | <i>AK2+AK3</i>                                | -0.3956        | 0.2578           |
| Thr-sensitive AK activity        | <i>AK3</i>                                    | 0.1413         | 0.6970           |
| <b>Thr-sensitive AK activity</b> | <b><i>AK-HSDH1</i></b>                        | <b>0.5687</b>  | <b>0.0863</b>    |
| Thr-sensitive AK activity        | <i>AK-HSDH2</i>                               | 0.3352         | 0.3438           |
| <b>Thr-sensitive AK activity</b> | <b><i>AK-HSDHs</i></b>                        | <b>0.5370</b>  | <b>0.1095</b>    |
| <b>Thr-sensitive AK activity</b> | <b><i>AK-HSDHs+CGS1</i></b>                   | <b>0.4561</b>  | <b>0.1853</b>    |
| <b>Thr-sensitive AK activity</b> | <b><i>AK-HSDHs+TS1</i></b>                    | <b>0.5097</b>  | <b>0.1324</b>    |
| <b>Thr-sensitive AK activity</b> | <b><i>AK-HSDHs+TS1+TD1</i></b>                | <b>0.4913</b>  | <b>0.1493</b>    |

|                                  |                                               |                |               |
|----------------------------------|-----------------------------------------------|----------------|---------------|
| <b>Thr-sensitive AK activity</b> | <i>AK-HSDHs+TSI+THAs</i>                      | <b>0.5006</b>  | <b>0.1406</b> |
| <b>Thr-sensitive AK activity</b> | <i>AKs</i>                                    | <b>-0.4689</b> | <b>0.1716</b> |
| <b>Thr-sensitive AK activity</b> | <i>AKs/AK-HSDHs</i>                           | <b>-0.6731</b> | <b>0.0329</b> |
| Thr-sensitive AK activity        | <i>AKs+AK-HSDHs</i>                           | -0.3466        | 0.3265        |
| Thr-sensitive AK activity        | <i>AKs+AK-HSDHs+CGSI</i>                      | -0.2623        | 0.4641        |
| Thr-sensitive AK activity        | <i>AKs+AK-HSDHs+DHDPSs</i>                    | -0.3369        | 0.3411        |
| Thr-sensitive AK activity        | <i>AKs+AK-HSDHs+TSI</i>                       | -0.0684        | 0.8510        |
| Thr-sensitive AK activity        | <i>AKs+AK-HSDHs+TSI+TD1</i>                   | -0.0544        | 0.8813        |
| Thr-sensitive AK activity        | <i>AKs+AK-HSDHs+TSI+THAs</i>                  | -0.0742        | 0.8387        |
| <b>Thr-sensitive AK activity</b> | <i>AKs+DHDPSs</i>                             | <b>-0.4603</b> | <b>0.1807</b> |
| Thr-sensitive AK activity        | <i>BCAT1</i>                                  | 0.2526         | 0.4813        |
| Thr-sensitive AK activity        | Biosynthetic genes analyzed                   | -0.0082        | 0.9822        |
| <b>Thr-sensitive AK activity</b> | <b>Catabolic genes analyzed</b>               | <b>0.4087</b>  | <b>0.2410</b> |
| Thr-sensitive AK activity        | <i>CGSI</i>                                   | 0.2813         | 0.4311        |
| <b>Thr-sensitive AK activity</b> | <i>CGSI/SAMSs</i>                             | <b>-0.4061</b> | <b>0.2443</b> |
| Thr-sensitive AK activity        | <i>CGSI/TSI</i>                               | -0.3427        | 0.3324        |
| Thr-sensitive AK activity        | <i>DHDPS1</i>                                 | -0.2646        | 0.4600        |
| <b>Thr-sensitive AK activity</b> | <i>DHDPS2</i>                                 | <b>0.4587</b>  | <b>0.1824</b> |
| Thr-sensitive AK activity        | <i>DHDPSs</i>                                 | 0.1495         | 0.6801        |
| <b>Thr-sensitive AK activity</b> | <i>DHDPSs/AK-HSDHs</i>                        | <b>-0.5679</b> | <b>0.0868</b> |
| <b>Thr-sensitive AK activity</b> | <i>DHDPSs/LKR-SDHI</i>                        | <b>0.5414</b>  | <b>0.1061</b> |
| Thr-sensitive AK activity        | HSDH activity with four effectors             | 0.1451         | 0.6891        |
| Thr-sensitive AK activity        | HSDH activity without effectors               | 0.1835         | 0.6119        |
| <b>Thr-sensitive AK activity</b> | <i>LKR-SDHI</i>                               | <b>-0.4171</b> | <b>0.2305</b> |
| Thr-sensitive AK activity        | Lys-sensitive AK activity                     | -0.1994        | 0.5808        |
| Thr-sensitive AK activity        | <i>SAMS1</i>                                  | 0.1693         | 0.6400        |
| Thr-sensitive AK activity        | <i>SAMS2</i>                                  | -0.0155        | 0.9660        |
| Thr-sensitive AK activity        | <i>SAMS3</i>                                  | 0.3504         | 0.3209        |
| <b>Thr-sensitive AK activity</b> | <i>SAMS4</i>                                  | <b>0.5307</b>  | <b>0.1145</b> |
| <b>Thr-sensitive AK activity</b> | <i>SAMSs</i>                                  | <b>0.4076</b>  | <b>0.2423</b> |
| Thr-sensitive AK activity        | <i>TD1</i>                                    | 0.2030         | 0.5737        |
| Thr-sensitive AK activity        | <i>TD1/BCAT1</i>                              | -0.1117        | 0.7587        |
| Thr-sensitive AK activity        | <i>THA1</i>                                   | -0.0024        | 0.9947        |
| <b>Thr-sensitive AK activity</b> | <i>THA2</i>                                   | <b>-0.4015</b> | <b>0.2501</b> |
| <b>Thr-sensitive AK activity</b> | <i>THAs</i>                                   | <b>-0.4319</b> | <b>0.2126</b> |
| Thr-sensitive AK activity        | <i>THAs+TD1</i>                               | 0.1161         | 0.7494        |
| <b>Thr-sensitive AK activity</b> | <i>TSI</i>                                    | <b>0.4308</b>  | <b>0.2139</b> |
| Thr-sensitive AK activity        | <i>TSI/(THAs+TD1)</i>                         | 0.3397         | 0.3370        |
| Thr-sensitive AK activity        | <i>TSI/TD1</i>                                | 0.1851         | 0.6087        |
| Thr-sensitive AK activity        | <i>TSI/THAs</i>                               | 0.3774         | 0.2823        |
| <b>Total free AAs</b>            | <i>(AK-HSDHs+CGSI)/SAMSs</i>                  | <b>-0.4226</b> | <b>0.2237</b> |
| <b>Total free AAs</b>            | <i>(AK-HSDHs+TSI)/(THAs+TD1)</i>              | <b>-0.6950</b> | <b>0.0257</b> |
| Total free AAs                   | <i>(AK-HSDHs+TSI+TD1)/BCAT1</i>               | 0.2928         | 0.4117        |
| Total free AAs                   | <i>(AKs+AK-HSDHs)/AK-HSDHs</i>                | 0.0759         | 0.8350        |
| Total free AAs                   | <i>(AKs+AK-HSDHs+CGSI)/SAMSs</i>              | -0.0119        | 0.9739        |
| Total free AAs                   | <i>(AKs+AK-HSDHs+DHDPSs)/LKR-SDHI</i>         | -0.1268        | 0.7270        |
| <b>Total free AAs</b>            | <i>(AKs+AK-HSDHs+TSI)/(THAs+TD1)</i>          | <b>-0.6258</b> | <b>0.0529</b> |
| Total free AAs                   | <i>(AKs+AK-HSDHs+TSI+TD1)/BCAT1</i>           | 0.3024         | 0.3958        |
| Total free AAs                   | <i>(AKs+DHDPSs)/LKR-SDHI</i>                  | -0.1379        | 0.7040        |
| Total free AAs                   | AK activity with four effectors               | -0.1964        | 0.5866        |
| Total free AAs                   | AK activity without effectors                 | -0.3820        | 0.2759        |
| Total free AAs                   | AK activity/HSDH activity with four effectors | -0.0858        | 0.8136        |
| Total free AAs                   | AK activity/HSDH activity without effectors   | 0.0314         | 0.9314        |
| Total free AAs                   | <i>AK1</i>                                    | 0.1297         | 0.7210        |
| Total free AAs                   | <i>AK1+AK2</i>                                | 0.1372         | 0.7055        |
| Total free AAs                   | <i>AK1+AK3</i>                                | 0.3986         | 0.2539        |
| Total free AAs                   | <i>AK2</i>                                    | 0.1059         | 0.7710        |

|                       |                                                     |                |                  |
|-----------------------|-----------------------------------------------------|----------------|------------------|
| Total free AAs        | AK2+AK3                                             | 0.1640         | 0.6508           |
| Total free AAs        | AK3                                                 | 0.3505         | 0.3207           |
| Total free AAs        | AK-HSDH1                                            | -0.2913        | 0.4141           |
| <b>Total free AAs</b> | <b>AK-HSDH2</b>                                     | <b>0.4869</b>  | <b>0.1535</b>    |
| Total free AAs        | AK-HSDHs                                            | 0.1533         | 0.6725           |
| Total free AAs        | AK-HSDHs+CGSI                                       | 0.1724         | 0.6340           |
| Total free AAs        | AK-HSDHs+TSI                                        | 0.2965         | 0.4055           |
| Total free AAs        | AK-HSDHs+TSI+TDI                                    | 0.3552         | 0.3138           |
| Total free AAs        | AK-HSDHs+TSI+THAs                                   | 0.2950         | 0.4079           |
| Total free AAs        | AKs                                                 | 0.1991         | 0.5812           |
| Total free AAs        | AKs/AK-HSDHs                                        | 0.0759         | 0.8350           |
| Total free AAs        | AKs+AK-HSDHs                                        | 0.2483         | 0.4891           |
| Total free AAs        | AKs+AK-HSDHs+CGSI                                   | 0.2705         | 0.4498           |
| Total free AAs        | AKs+AK-HSDHs+DHDPSs                                 | 0.2774         | 0.4377           |
| Total free AAs        | AKs+AK-HSDHs+TSI                                    | 0.3448         | 0.3292           |
| Total free AAs        | AKs+AK-HSDHs+TSI+TDI                                | 0.3863         | 0.2702           |
| Total free AAs        | AKs+AK-HSDHs+TSI+THAs                               | 0.3417         | 0.3339           |
| Total free AAs        | AKs+DHDPSs                                          | 0.2307         | 0.5214           |
| <b>Total free AAs</b> | <b>BCATI</b>                                        | <b>-0.9032</b> | <b>0.0003</b>    |
| Total free AAs        | Biosynthetic genes analyzed                         | 0.3620         | 0.3040           |
| Total free AAs        | Catabolic genes analyzed                            | 0.3967         | 0.2563           |
| Total free AAs        | CGSI                                                | 0.1643         | 0.6502           |
| Total free AAs        | CGSI/SAMSs                                          | -0.3242        | 0.3608           |
| Total free AAs        | CGSI/TSI                                            | -0.1636        | 0.6515           |
| <b>Total free AAs</b> | <b>DHDPS1</b>                                       | <b>0.6898</b>  | <b>0.0273</b>    |
| <b>Total free AAs</b> | <b>DHDPS2</b>                                       | <b>0.5580</b>  | <b>0.0937</b>    |
| <b>Total free AAs</b> | <b>DHDPSs</b>                                       | <b>0.8164</b>  | <b>0.0040</b>    |
| Total free AAs        | DHDPSs/AK-HSDHs                                     | 0.1041         | 0.7747           |
| Total free AAs        | DHDPSs/LKR-SDH1                                     | 0.2007         | 0.5783           |
| <b>Total free AAs</b> | <b>Free Ala</b>                                     | <b>0.7601</b>  | <b>0.0107</b>    |
| <b>Total free AAs</b> | <b>Free Arg</b>                                     | <b>0.6492</b>  | <b>0.0422</b>    |
| <b>Total free AAs</b> | <b>Free Asn</b>                                     | <b>0.9477</b>  | <b>&lt;.0001</b> |
| <b>Total free AAs</b> | <b>Free Asp</b>                                     | <b>0.9222</b>  | <b>0.0001</b>    |
| <b>Total free AAs</b> | <b>Free Cys</b>                                     | <b>0.5121</b>  | <b>0.1302</b>    |
| <b>Total free AAs</b> | <b>Free Gln</b>                                     | <b>0.9326</b>  | <b>&lt;.0001</b> |
| <b>Total free AAs</b> | <b>Free Glu</b>                                     | <b>0.9050</b>  | <b>0.0003</b>    |
| <b>Total free AAs</b> | <b>Free Gly</b>                                     | <b>0.8154</b>  | <b>0.0040</b>    |
| <b>Total free AAs</b> | <b>Free His</b>                                     | <b>0.8132</b>  | <b>0.0042</b>    |
| Total free AAs        | Free Ile                                            | 0.3873         | 0.2688           |
| <b>Total free AAs</b> | <b>Free Leu</b>                                     | <b>0.7444</b>  | <b>0.0135</b>    |
| <b>Total free AAs</b> | <b>Free Lys</b>                                     | <b>0.7577</b>  | <b>0.0111</b>    |
| <b>Total free AAs</b> | <b>Free Met</b>                                     | <b>0.6353</b>  | <b>0.0484</b>    |
| <b>Total free AAs</b> | <b>Free Phe</b>                                     | <b>0.6639</b>  | <b>0.0363</b>    |
| <b>Total free AAs</b> | <b>Free Pro</b>                                     | <b>0.9278</b>  | <b>0.0001</b>    |
| <b>Total free AAs</b> | <b>Free Ser</b>                                     | <b>0.5503</b>  | <b>0.0993</b>    |
| Total free AAs        | Free Thr                                            | 0.1779         | 0.6230           |
| <b>Total free AAs</b> | <b>Free Trp</b>                                     | <b>0.5808</b>  | <b>0.0783</b>    |
| Total free AAs        | Free Tyr                                            | 0.3809         | 0.2776           |
| <b>Total free AAs</b> | <b>Free Val</b>                                     | <b>0.5218</b>  | <b>0.1219</b>    |
| Total free AAs        | HSDH activity with four effectors                   | 0.0826         | 0.8206           |
| Total free AAs        | HSDH activity without effectors                     | -0.2204        | 0.5407           |
| Total free AAs        | LKR-SDH1                                            | 0.1574         | 0.6641           |
| <b>Total free AAs</b> | <b>Lys-sensitive AK activity</b>                    | <b>-0.5124</b> | <b>0.1300</b>    |
| Total free AAs        | Lys-sensitive AK activity/Thr-sensitive AK activity | -0.0057        | 0.9875           |
| <b>Total free AAs</b> | <b>SAMS1</b>                                        | <b>0.7679</b>  | <b>0.0095</b>    |
| <b>Total free AAs</b> | <b>SAMS2</b>                                        | <b>0.7851</b>  | <b>0.0071</b>    |
| Total free AAs        | SAMS3                                               | 0.0522         | 0.8860           |
| Total free AAs        | SAMS4                                               | 0.3911         | 0.2638           |

|                                |                                               |                |               |
|--------------------------------|-----------------------------------------------|----------------|---------------|
| Total free AAs                 | <i>SAMSs</i>                                  | 0.3957         | 0.2577        |
| <b>Total free AAs</b>          | <b><i>TD1</i></b>                             | <b>-0.8165</b> | <b>0.0039</b> |
| Total free AAs                 | <i>TD1/BCAT1</i>                              | 0.3548         | 0.3145        |
| Total free AAs                 | <i>THA1</i>                                   | -0.2158        | 0.5493        |
| Total free AAs                 | <i>THA2</i>                                   | -0.0138        | 0.9698        |
| Total free AAs                 | <i>THAs</i>                                   | 0.0276         | 0.9397        |
| <b>Total free AAs</b>          | <b><i>THAs+TD1</i></b>                        | <b>0.7870</b>  | <b>0.0069</b> |
| Total free AAs                 | Thr-sensitive AK activity                     | -0.2384        | 0.5071        |
| Total free AAs                 | <i>TS1</i>                                    | 0.3194         | 0.3684        |
| <b>Total free AAs</b>          | <b><i>TS1/(THAs+TD1)</i></b>                  | <b>-0.8161</b> | <b>0.0040</b> |
| <b>Total free AAs</b>          | <b><i>TS1/TD1</i></b>                         | <b>-0.7720</b> | <b>0.0089</b> |
| <b>Total free AAs</b>          | <b><i>TS1/THAs</i></b>                        | <b>0.5054</b>  | <b>0.1362</b> |
| Total protein-bound AAs        | <i>(AK-HSDHs+CGS1)/SAMSs</i>                  | -0.2541        | 0.4787        |
| Total protein-bound AAs        | <i>(AK-HSDHs+TS1)/(THAs+TD1)</i>              | 0.3971         | 0.2559        |
| <b>Total protein-bound AAs</b> | <b><i>(AK-HSDHs+TS1+TD1)/BCAT1</i></b>        | <b>-0.5145</b> | <b>0.1281</b> |
| Total protein-bound AAs        | <i>(AKs+AK-HSDHs)/AK-HSDHs</i>                | -0.2913        | 0.4141        |
| Total protein-bound AAs        | <i>(AKs+AK-HSDHs+CGS1)/SAMSs</i>              | -0.2827        | 0.4287        |
| Total protein-bound AAs        | <i>(AKs+AK-HSDHs+DHDPSs)/LKR-SDHI</i>         | -0.0528        | 0.8848        |
| Total protein-bound AAs        | <i>(AKs+AK-HSDHs+TS1)/(THAs+TD1)</i>          | 0.1724         | 0.6339        |
| <b>Total protein-bound AAs</b> | <b><i>(AKs+AK-HSDHs+TS1+TD1)/BCAT1</i></b>    | <b>-0.5341</b> | <b>0.1117</b> |
| Total protein-bound AAs        | <i>(AKs+DHDPSs)/LKR-SDHI</i>                  | -0.1243        | 0.7323        |
| Total protein-bound AAs        | AK activity with four effectors               | -0.0216        | 0.9528        |
| Total protein-bound AAs        | AK activity without effectors                 | 0.2226         | 0.5365        |
| Total protein-bound AAs        | AK activity/HSDH activity with four effectors | 0.0158         | 0.9654        |
| Total protein-bound AAs        | AK activity/HSDH activity without effectors   | -0.1233        | 0.7344        |
| Total protein-bound AAs        | <i>AK1</i>                                    | -0.1735        | 0.6316        |
| Total protein-bound AAs        | <i>AK1+AK2</i>                                | -0.2899        | 0.4165        |
| Total protein-bound AAs        | <i>AK1+AK3</i>                                | -0.1254        | 0.7299        |
| Total protein-bound AAs        | <i>AK2</i>                                    | -0.2447        | 0.4957        |
| Total protein-bound AAs        | <i>AK2+AK3</i>                                | -0.2305        | 0.5217        |
| Total protein-bound AAs        | <i>AK3</i>                                    | 0.0377         | 0.9177        |
| <b>Total protein-bound AAs</b> | <b><i>AK-HSDHI</i></b>                        | <b>0.5334</b>  | <b>0.1123</b> |
| Total protein-bound AAs        | <i>AK-HSDH2</i>                               | -0.2747        | 0.4425        |
| Total protein-bound AAs        | <i>AK-HSDHs</i>                               | 0.1186         | 0.7441        |
| Total protein-bound AAs        | <i>AK-HSDHs+CGS1</i>                          | -0.0322        | 0.9297        |
| Total protein-bound AAs        | <i>AK-HSDHs+TS1</i>                           | 0.2392         | 0.5057        |
| Total protein-bound AAs        | <i>AK-HSDHs+TS1+TD1</i>                       | 0.2105         | 0.5595        |
| Total protein-bound AAs        | <i>AK-HSDHs+TS1+THAs</i>                      | 0.2358         | 0.5119        |
| Total protein-bound AAs        | <i>AKs</i>                                    | -0.2787        | 0.4356        |
| Total protein-bound AAs        | <i>AKs/AK-HSDHs</i>                           | -0.2913        | 0.4141        |
| Total protein-bound AAs        | <i>AKs+AK-HSDHs</i>                           | -0.2589        | 0.4701        |
| Total protein-bound AAs        | <i>AKs+AK-HSDHs+CGS1</i>                      | -0.2862        | 0.4228        |
| Total protein-bound AAs        | <i>AKs+AK-HSDHs+DHDPSs</i>                    | -0.2602        | 0.4678        |
| Total protein-bound AAs        | <i>AKs+AK-HSDHs+TS1</i>                       | -0.0794        | 0.8273        |
| Total protein-bound AAs        | <i>AKs+AK-HSDHs+TS1+TD1</i>                   | -0.0848        | 0.8159        |
| Total protein-bound AAs        | <i>AKs+AK-HSDHs+TS1+THAs</i>                  | -0.0812        | 0.8235        |
| Total protein-bound AAs        | <i>AKs+DHDPSs</i>                             | -0.2820        | 0.4298        |
| <b>Total protein-bound AAs</b> | <b><i>BCAT1</i></b>                           | <b>0.6417</b>  | <b>0.0455</b> |
| Total protein-bound AAs        | Biosynthetic genes analyzed                   | -0.1062        | 0.7704        |
| Total protein-bound AAs        | Catabolic genes analyzed                      | 0.0603         | 0.8685        |
| Total protein-bound AAs        | <i>CGS1</i>                                   | -0.1871        | 0.6048        |
| Total protein-bound AAs        | <i>CGS1/SAMSs</i>                             | -0.2945        | 0.4088        |
| <b>Total protein-bound AAs</b> | <b><i>CGS1/TS1</i></b>                        | <b>-0.5529</b> | <b>0.0974</b> |
| Total protein-bound AAs        | <i>DHDPS1</i>                                 | -0.1061        | 0.7706        |
| Total protein-bound AAs        | <i>DHDPS2</i>                                 | -0.0719        | 0.8436        |
| Total protein-bound AAs        | <i>DHDPSs</i>                                 | -0.1115        | 0.7592        |
| Total protein-bound AAs        | <i>DHDPSs/AK-HSDHs</i>                        | -0.1971        | 0.5852        |



|                                |                                                     |                |                  |
|--------------------------------|-----------------------------------------------------|----------------|------------------|
| Total protein-bound AAs        | <i>DHDPSs/LKR-SDHI</i>                              | 0.0560         | 0.8780           |
| Total protein-bound AAs        | Free (Lys+Met+Thr+Ile)/Asp                          | 0.3087         | 0.3854           |
| Total protein-bound AAs        | Free Ala                                            | -0.1652        | 0.6483           |
| <b>Total protein-bound AAs</b> | <b>Free Arg</b>                                     | <b>-0.6143</b> | <b>0.0588</b>    |
| <b>Total protein-bound AAs</b> | <b>Free Asn</b>                                     | <b>-0.5289</b> | <b>0.1160</b>    |
| <b>Total protein-bound AAs</b> | <b>Free Asn+Asp</b>                                 | <b>-0.4868</b> | <b>0.1537</b>    |
| Total protein-bound AAs        | Free Asn+Asp+Lys+Met+Thr+Ile                        | -0.1624        | 0.6540           |
| Total protein-bound AAs        | Free Asn+Asp+Lys+Thr+Ile                            | -0.1576        | 0.6638           |
| <b>Total protein-bound AAs</b> | <b>Free Asp</b>                                     | <b>-0.4756</b> | <b>0.1647</b>    |
| Total protein-bound AAs        | Free Asp+Lys+Met+Thr+Ile                            | -0.1286        | 0.7233           |
| Total protein-bound AAs        | Free Cys                                            | -0.2031        | 0.5736           |
| <b>Total protein-bound AAs</b> | <b>Free Gln</b>                                     | <b>-0.5279</b> | <b>0.1168</b>    |
| <b>Total protein-bound AAs</b> | <b>Free Glu</b>                                     | <b>-0.5564</b> | <b>0.0949</b>    |
| Total protein-bound AAs        | Free Gly                                            | -0.2307        | 0.5213           |
| Total protein-bound AAs        | Free Gly/Thr                                        | 0.0906         | 0.8034           |
| Total protein-bound AAs        | Free Gly+Ile                                        | -0.2331        | 0.5169           |
| <b>Total protein-bound AAs</b> | <b>Free His</b>                                     | <b>-0.4985</b> | <b>0.1425</b>    |
| Total protein-bound AAs        | Free Ile                                            | -0.0747        | 0.8374           |
| Total protein-bound AAs        | Free Ile/Thr                                        | 0.1803         | 0.6181           |
| <b>Total protein-bound AAs</b> | <b>Free Leu</b>                                     | <b>-0.4207</b> | <b>0.2260</b>    |
| <b>Total protein-bound AAs</b> | <b>Free Lys</b>                                     | <b>-0.5975</b> | <b>0.0681</b>    |
| Total protein-bound AAs        | Free Lys/(Met+Thr+Ile)                              | 0.0524         | 0.8856           |
| Total protein-bound AAs        | Free Lys/Asp                                        | 0.0197         | 0.9569           |
| Total protein-bound AAs        | Free Lys/Thr                                        | 0.0935         | 0.7972           |
| Total protein-bound AAs        | Free Lys+Met+Thr+Ile                                | 0.0651         | 0.8582           |
| <b>Total protein-bound AAs</b> | <b>Free Met</b>                                     | <b>-0.5676</b> | <b>0.0870</b>    |
| Total protein-bound AAs        | Free Met/(Thr+Ile)                                  | 0.0303         | 0.9337           |
| Total protein-bound AAs        | Free Met/Thr                                        | 0.1081         | 0.7664           |
| Total protein-bound AAs        | Free Met+Thr+Ile                                    | 0.0870         | 0.8112           |
| Total protein-bound AAs        | Free Phe                                            | -0.2803        | 0.4328           |
| <b>Total protein-bound AAs</b> | <b>Free Pro</b>                                     | <b>-0.6190</b> | <b>0.0564</b>    |
| Total protein-bound AAs        | Free Ser                                            | -0.1352        | 0.7096           |
| Total protein-bound AAs        | Free Thr                                            | 0.0961         | 0.7917           |
| Total protein-bound AAs        | Free Thr/(Gly+Ile)                                  | 0.1192         | 0.7429           |
| Total protein-bound AAs        | Free Thr/Asp                                        | 0.3085         | 0.3858           |
| Total protein-bound AAs        | Free Trp                                            | -0.2095        | 0.5614           |
| Total protein-bound AAs        | Free Tyr                                            | -0.3254        | 0.3589           |
| Total protein-bound AAs        | Free Val                                            | -0.0374        | 0.9183           |
| Total protein-bound AAs        | HSDH activity with four effectors                   | -0.2038        | 0.5722           |
| Total protein-bound AAs        | HSDH activity without effectors                     | 0.1221         | 0.7369           |
| Total protein-bound AAs        | <i>LKR-SDHI</i>                                     | 0.0452         | 0.9013           |
| Total protein-bound AAs        | Lys-sensitive AK activity                           | 0.2206         | 0.5403           |
| Total protein-bound AAs        | Lys-sensitive AK activity/Thr-sensitive AK activity | -0.3824        | 0.2755           |
| <b>Total protein-bound AAs</b> | <b>Protein-bound Ala</b>                            | <b>0.9634</b>  | <b>&lt;.0001</b> |
| <b>Total protein-bound AAs</b> | <b>Protein-bound Arg</b>                            | <b>0.4636</b>  | <b>0.1772</b>    |
| <b>Total protein-bound AAs</b> | <b>Protein-bound Gly</b>                            | <b>0.9009</b>  | <b>0.0004</b>    |
| Total protein-bound AAs        | Protein-bound His                                   | 0.3426         | 0.3325           |
| <b>Total protein-bound AAs</b> | <b>Protein-bound Ile</b>                            | <b>0.4820</b>  | <b>0.1584</b>    |
| <b>Total protein-bound AAs</b> | <b>Protein-bound Leu</b>                            | <b>0.5012</b>  | <b>0.1400</b>    |
| Total protein-bound AAs        | Protein-bound Lys                                   | 0.3598         | 0.3072           |
| Total protein-bound AAs        | Protein-bound Phe                                   | 0.3079         | 0.3867           |
| <b>Total protein-bound AAs</b> | <b>Protein-bound Pro</b>                            | <b>0.9638</b>  | <b>&lt;.0001</b> |
| <b>Total protein-bound AAs</b> | <b>Protein-bound Ser</b>                            | <b>0.9434</b>  | <b>&lt;.0001</b> |
| <b>Total protein-bound AAs</b> | <b>Protein-bound Thr</b>                            | <b>0.9471</b>  | <b>&lt;.0001</b> |
| <b>Total protein-bound AAs</b> | <b>Protein-bound Tyr</b>                            | <b>0.7450</b>  | <b>0.0134</b>    |
| Total protein-bound AAs        | Protein-bound Val                                   | 0.3924         | 0.2620           |
| Total protein-bound AAs        | <i>SAMS1</i>                                        | -0.2572        | 0.4732           |
| Total protein-bound AAs        | <i>SAMS2</i>                                        | -0.0828        | 0.8202           |

|                                |                                  |                |               |
|--------------------------------|----------------------------------|----------------|---------------|
| Total protein-bound AAs        | SAMS3                            | 0.1698         | 0.6391        |
| Total protein-bound AAs        | SAMS4                            | 0.1432         | 0.6931        |
| Total protein-bound AAs        | SAMSs                            | 0.0567         | 0.8763        |
| Total protein-bound AAs        | TD1                              | -0.1227        | 0.7356        |
| <b>Total protein-bound AAs</b> | <b>TD1/BCAT1</b>                 | <b>-0.5280</b> | <b>0.1167</b> |
| Total protein-bound AAs        | THA1                             | 0.3264         | 0.3573        |
| Total protein-bound AAs        | THA2                             | -0.2071        | 0.5660        |
| Total protein-bound AAs        | THAs                             | -0.2057        | 0.5687        |
| Total protein-bound AAs        | THAs+TD1                         | -0.1497        | 0.6798        |
| <b>Total protein-bound AAs</b> | <b>Thr-sensitive AK activity</b> | <b>0.6575</b>  | <b>0.0388</b> |
| <b>Total protein-bound AAs</b> | <b>Total free AAs</b>            | <b>-0.4911</b> | <b>0.1494</b> |
| Total protein-bound AAs        | TS1                              | 0.2612         | 0.4661        |
| <b>Total protein-bound AAs</b> | <b>TS1/(THAs+TD1)</b>            | <b>0.4909</b>  | <b>0.1497</b> |
| Total protein-bound AAs        | TS1/TD1                          | 0.3054         | 0.3909        |
| Total protein-bound AAs        | TS1/THAs                         | 0.1358         | 0.7083        |
| TS1                            | AK1                              | -0.2479        | 0.4899        |
| TS1                            | AK2                              | 0.0905         | 0.8037        |
| TS1                            | AK3                              | 0.1299         | 0.7206        |
| <b>TS1</b>                     | <b>AK-HSDH1</b>                  | <b>0.5200</b>  | <b>0.1234</b> |
| <b>TS1</b>                     | <b>AK-HSDH2</b>                  | <b>0.4521</b>  | <b>0.1896</b> |
| <b>TS1</b>                     | <b>CGS1</b>                      | <b>0.6356</b>  | <b>0.0482</b> |
| <b>TS1</b>                     | <b>DHDPS1</b>                    | <b>0.4429</b>  | <b>0.1998</b> |
| <b>TS1</b>                     | <b>DHDPS2</b>                    | <b>0.7143</b>  | <b>0.0203</b> |
| TS1/(THAs+TD1)                 | (AK-HSDHs+CGS1)/SAMSs            | 0.2838         | 0.4268        |
| TS1/(THAs+TD1)                 | (AKs+AK-HSDHs)/AK-HSDHs          | -0.2952        | 0.4077        |
| TS1/(THAs+TD1)                 | (AKs+AK-HSDHs+CGS1)/SAMSs        | -0.0775        | 0.8315        |
| TS1/(THAs+TD1)                 | (AKs+AK-HSDHs+DHDPSs)/LKR-SDHI   | 0.3367         | 0.3414        |
| TS1/(THAs+TD1)                 | (AKs+DHDPSs)/LKR-SDHI            | 0.2941         | 0.4095        |
| TS1/(THAs+TD1)                 | AK1                              | 0.2572         | 0.4732        |
| TS1/(THAs+TD1)                 | AK1+AK2                          | -0.1075        | 0.7676        |
| TS1/(THAs+TD1)                 | AK1+AK3                          | 0.0102         | 0.9777        |
| TS1/(THAs+TD1)                 | AK2                              | -0.1581        | 0.6626        |
| TS1/(THAs+TD1)                 | AK2+AK3                          | -0.2013        | 0.5771        |
| TS1/(THAs+TD1)                 | AK3                              | -0.2845        | 0.4256        |
| <b>TS1/(THAs+TD1)</b>          | <b>AK-HSDH1</b>                  | <b>0.4957</b>  | <b>0.1451</b> |
| TS1/(THAs+TD1)                 | AK-HSDH2                         | -0.1930        | 0.5932        |
| TS1/(THAs+TD1)                 | AK-HSDHs                         | 0.1536         | 0.6719        |
| TS1/(THAs+TD1)                 | AK-HSDHs+CGS1                    | -0.0061        | 0.9867        |
| TS1/(THAs+TD1)                 | AK-HSDHs+TS1                     | -0.0015        | 0.9968        |
| TS1/(THAs+TD1)                 | AK-HSDHs+TS1+TD1                 | -0.0683        | 0.8513        |
| TS1/(THAs+TD1)                 | AK-HSDHs+TS1+THAs                | -0.0046        | 0.9900        |
| TS1/(THAs+TD1)                 | AKs                              | -0.1571        | 0.6648        |
| TS1/(THAs+TD1)                 | AKs/AK-HSDHs                     | -0.2952        | 0.4077        |
| TS1/(THAs+TD1)                 | AKs+AK-HSDHs                     | -0.1242        | 0.7324        |
| TS1/(THAs+TD1)                 | AKs+AK-HSDHs+CGS1                | -0.1565        | 0.6658        |
| TS1/(THAs+TD1)                 | AKs+AK-HSDHs+DHDPSs              | -0.1431        | 0.6933        |
| TS1/(THAs+TD1)                 | AKs+AK-HSDHs+TS1                 | -0.1288        | 0.7228        |
| TS1/(THAs+TD1)                 | AKs+AK-HSDHs+TS1+TD1             | -0.1688        | 0.6411        |
| TS1/(THAs+TD1)                 | AKs+AK-HSDHs+TS1+THAs            | -0.1302        | 0.7199        |
| TS1/(THAs+TD1)                 | AKs+DHDPSs                       | -0.1773        | 0.6240        |
| <b>TS1/(THAs+TD1)</b>          | <b>BCAT1</b>                     | <b>0.8581</b>  | <b>0.0015</b> |
| TS1/(THAs+TD1)                 | Biosynthetic genes analyzed      | -0.1611        | 0.6565        |
| TS1/(THAs+TD1)                 | Catabolic genes analyzed         | -0.2229        | 0.5359        |
| TS1/(THAs+TD1)                 | CGS1                             | -0.1796        | 0.6195        |
| TS1/(THAs+TD1)                 | CGS1/SAMSs                       | 0.0103         | 0.9775        |
| <b>TS1/(THAs+TD1)</b>          | <b>DHDPS1</b>                    | <b>-0.5005</b> | <b>0.1407</b> |
| TS1/(THAs+TD1)                 | DHDPS2                           | -0.3170        | 0.3721        |

|                              |                                              |                |                  |
|------------------------------|----------------------------------------------|----------------|------------------|
| <i>TS1/(THAs+TD1)</i>        | <i>DHDPSs</i>                                | <b>-0.5288</b> | <b>0.1161</b>    |
| <i>TS1/(THAs+TD1)</i>        | <i>DHDPSs/LKR-SDHI</i>                       | 0.0392         | 0.9143           |
| <i>TS1/(THAs+TD1)</i>        | <i>LKR-SDHI</i>                              | -0.2442        | 0.4966           |
| <b><i>TS1/(THAs+TD1)</i></b> | <b><i>SAMS1</i></b>                          | <b>-0.8267</b> | <b>0.0032</b>    |
| <b><i>TS1/(THAs+TD1)</i></b> | <b><i>SAMS2</i></b>                          | <b>-0.6527</b> | <b>0.0408</b>    |
| <i>TS1/(THAs+TD1)</i>        | <i>SAMS3</i>                                 | 0.1751         | 0.6284           |
| <i>TS1/(THAs+TD1)</i>        | <i>SAMS4</i>                                 | -0.2376        | 0.5086           |
| <i>TS1/(THAs+TD1)</i>        | <i>SAMSs</i>                                 | -0.2217        | 0.5381           |
| <b><i>TS1/(THAs+TD1)</i></b> | <b><i>TD1</i></b>                            | <b>-0.6912</b> | <b>0.0268</b>    |
| <i>TS1/(THAs+TD1)</i>        | <i>THA1</i>                                  | 0.1206         | 0.7400           |
| <i>TS1/(THAs+TD1)</i>        | <i>THA2</i>                                  | -0.2076        | 0.5650           |
| <i>TS1/(THAs+TD1)</i>        | <i>THAs</i>                                  | -0.2229        | 0.5358           |
| <b><i>TS1/(THAs+TD1)</i></b> | <b><i>THAs+TD1</i></b>                       | <b>-0.7041</b> | <b>0.0230</b>    |
| <i>TS1/(THAs+TD1)</i>        | <i>TS1</i>                                   | -0.0671        | 0.8539           |
| <b><i>TS1/(THAs+TD1)</i></b> | <b><i>TS1/TD1</i></b>                        | <b>0.9369</b>  | <b>&lt;.0001</b> |
| <i>TS1/(THAs+TD1)</i>        | <i>TS1/THAs</i>                              | -0.2056        | 0.5688           |
| <i>TS1/TD1</i>               | <i>(AK-HSDHs+CGS1)/SAMSs</i>                 | 0.3531         | 0.3170           |
| <i>TS1/TD1</i>               | <i>(AKs+AK-HSDHs)/AK-HSDHs</i>               | -0.2201        | 0.5411           |
| <i>TS1/TD1</i>               | <i>(AKs+AK-HSDHs+CGS1)/SAMSs</i>             | 0.0046         | 0.9900           |
| <b><i>TS1/TD1</i></b>        | <b><i>(AKs+AK-HSDHs+DHDPSs)/LKR-SDHI</i></b> | <b>0.4533</b>  | <b>0.1883</b>    |
| <b><i>TS1/TD1</i></b>        | <b><i>(AKs+DHDPSs)/LKR-SDHI</i></b>          | <b>0.4130</b>  | <b>0.2355</b>    |
| <i>TS1/TD1</i>               | <i>AK1</i>                                   | 0.2782         | 0.4364           |
| <i>TS1/TD1</i>               | <i>AK1+AK2</i>                               | -0.0624        | 0.8640           |
| <i>TS1/TD1</i>               | <i>AK1+AK3</i>                               | 0.1667         | 0.6453           |
| <i>TS1/TD1</i>               | <i>AK2</i>                                   | -0.1186        | 0.7441           |
| <i>TS1/TD1</i>               | <i>AK2+AK3</i>                               | -0.1327        | 0.7148           |
| <i>TS1/TD1</i>               | <i>AK3</i>                                   | -0.1112        | 0.7598           |
| <b><i>TS1/TD1</i></b>        | <b><i>AK-HSDHI</i></b>                       | <b>0.4384</b>  | <b>0.2050</b>    |
| <i>TS1/TD1</i>               | <i>AK-HSDH2</i>                              | -0.0919        | 0.8007           |
| <i>TS1/TD1</i>               | <i>AK-HSDHs</i>                              | 0.1861         | 0.6066           |
| <i>TS1/TD1</i>               | <i>AK-HSDHs+CGS1</i>                         | 0.0099         | 0.9784           |
| <i>TS1/TD1</i>               | <i>AK-HSDHs+TS1</i>                          | -0.1127        | 0.7566           |
| <i>TS1/TD1</i>               | <i>AK-HSDHs+TS1+TD1</i>                      | -0.1761        | 0.6265           |
| <i>TS1/TD1</i>               | <i>AK-HSDHs+TS1+THAs</i>                     | -0.1171        | 0.7473           |
| <i>TS1/TD1</i>               | <i>AKs</i>                                   | -0.0811        | 0.8237           |
| <i>TS1/TD1</i>               | <i>AKs/AK-HSDHs</i>                          | -0.2201        | 0.5411           |
| <i>TS1/TD1</i>               | <i>AKs+AK-HSDHs</i>                          | -0.0363        | 0.9206           |
| <i>TS1/TD1</i>               | <i>AKs+AK-HSDHs+CGS1</i>                     | -0.0754        | 0.8359           |
| <i>TS1/TD1</i>               | <i>AKs+AK-HSDHs+DHDPSs</i>                   | -0.0600        | 0.8692           |
| <i>TS1/TD1</i>               | <i>AKs+AK-HSDHs+TS1</i>                      | -0.1358        | 0.7083           |
| <i>TS1/TD1</i>               | <i>AKs+AK-HSDHs+TS1+TD1</i>                  | -0.1779        | 0.6230           |
| <i>TS1/TD1</i>               | <i>AKs+AK-HSDHs+TS1+THAs</i>                 | -0.1375        | 0.7047           |
| <i>TS1/TD1</i>               | <i>AKs+DHDPSs</i>                            | -0.1056        | 0.7715           |
| <b><i>TS1/TD1</i></b>        | <b><i>BCAT1</i></b>                          | <b>0.8040</b>  | <b>0.0051</b>    |
| <i>TS1/TD1</i>               | Biosynthetic genes analyzed                  | -0.1716        | 0.6356           |
| <i>TS1/TD1</i>               | Catabolic genes analyzed                     | -0.2176        | 0.5459           |
| <i>TS1/TD1</i>               | <i>CGS1</i>                                  | -0.1852        | 0.6084           |
| <i>TS1/TD1</i>               | <i>CGS1/SAMSs</i>                            | 0.0399         | 0.9128           |
| <b><i>TS1/TD1</i></b>        | <b><i>DHDPS1</i></b>                         | <b>-0.6112</b> | <b>0.0605</b>    |
| <i>TS1/TD1</i>               | <i>DHDPS2</i>                                | -0.3746        | 0.2862           |
| <b><i>TS1/TD1</i></b>        | <b><i>DHDPSs</i></b>                         | <b>-0.6302</b> | <b>0.0508</b>    |
| <i>TS1/TD1</i>               | <i>DHDPSs/LKR-SDHI</i>                       | 0.0421         | 0.9080           |
| <i>TS1/TD1</i>               | <i>LKR-SDHI</i>                              | -0.3073        | 0.3878           |
| <b><i>TS1/TD1</i></b>        | <b><i>SAMS1</i></b>                          | <b>-0.8175</b> | <b>0.0039</b>    |
| <b><i>TS1/TD1</i></b>        | <b><i>SAMS2</i></b>                          | <b>-0.7313</b> | <b>0.0162</b>    |
| <i>TS1/TD1</i>               | <i>SAMS3</i>                                 | 0.1868         | 0.6053           |
| <i>TS1/TD1</i>               | <i>SAMS4</i>                                 | -0.2550        | 0.4771           |

|                        |                                         |                |               |
|------------------------|-----------------------------------------|----------------|---------------|
| <i>TS1/TD1</i>         | <i>SAMSs</i>                            | -0.2152        | 0.5505        |
| <b><i>TS1/TD1</i></b>  | <b><i>TD1</i></b>                       | <b>-0.7315</b> | <b>0.0162</b> |
| <i>TS1/TD1</i>         | <i>THA1</i>                             | 0.0273         | 0.9403        |
| <i>TS1/TD1</i>         | <i>THA2</i>                             | -0.2309        | 0.5209        |
| <i>TS1/TD1</i>         | <i>THAs</i>                             | -0.2618        | 0.4650        |
| <b><i>TS1/TD1</i></b>  | <b><i>THAs+TD1</i></b>                  | <b>-0.7533</b> | <b>0.0119</b> |
| <i>TS1/TD1</i>         | <i>TS1</i>                              | -0.2282        | 0.5259        |
| <b><i>TS1/THAs</i></b> | <b><i>(AK-HSDHs+CGS1)/SAMSs</i></b>     | <b>-0.6274</b> | <b>0.0521</b> |
| <b><i>TS1/THAs</i></b> | <b><i>(AKs+AK-HSDHs)/AK-HSDHs</i></b>   | <b>-0.7343</b> | <b>0.0156</b> |
| <b><i>TS1/THAs</i></b> | <b><i>(AKs+AK-HSDHs+CGS1)/SAMSs</i></b> | <b>-0.6867</b> | <b>0.0283</b> |
| <i>TS1/THAs</i>        | <i>(AKs+AK-HSDHs+DHDPSs)/LKR-SDHI</i>   | 0.1736         | 0.6316        |
| <i>TS1/THAs</i>        | <i>(AKs+DHDPSs)/LKR-SDHI</i>            | -0.0326        | 0.9287        |
| <i>TS1/THAs</i>        | <i>AK1</i>                              | 0.3162         | 0.3734        |
| <b><i>TS1/THAs</i></b> | <b><i>AK1+AK2</i></b>                   | <b>-0.4512</b> | <b>0.1906</b> |
| <b><i>TS1/THAs</i></b> | <b><i>AK1+AK3</i></b>                   | <b>0.4189</b>  | <b>0.2282</b> |
| <b><i>TS1/THAs</i></b> | <b><i>AK2</i></b>                       | <b>-0.5004</b> | <b>0.1407</b> |
| <b><i>TS1/THAs</i></b> | <b><i>AK2+AK3</i></b>                   | <b>-0.4576</b> | <b>0.1836</b> |
| <i>TS1/THAs</i>        | <i>AK3</i>                              | 0.1593         | 0.6602        |
| <b><i>TS1/THAs</i></b> | <b><i>AK-HSDH1</i></b>                  | <b>0.6001</b>  | <b>0.0666</b> |
| <b><i>TS1/THAs</i></b> | <b><i>AK-HSDH2</i></b>                  | <b>0.6773</b>  | <b>0.0314</b> |
| <b><i>TS1/THAs</i></b> | <b><i>AK-HSDHs</i></b>                  | <b>0.7782</b>  | <b>0.0080</b> |
| <b><i>TS1/THAs</i></b> | <b><i>AK-HSDHs+CGS1</i></b>             | <b>0.5973</b>  | <b>0.0682</b> |
| <b><i>TS1/THAs</i></b> | <b><i>AK-HSDHs+TS1</i></b>              | <b>0.6310</b>  | <b>0.0504</b> |
| <b><i>TS1/THAs</i></b> | <b><i>AK-HSDHs+TS1+TD1</i></b>          | <b>0.6506</b>  | <b>0.0416</b> |
| <b><i>TS1/THAs</i></b> | <b><i>AK-HSDHs+TS1+THAs</i></b>         | <b>0.6180</b>  | <b>0.0569</b> |
| <b><i>TS1/THAs</i></b> | <b><i>AKs</i></b>                       | <b>-0.4141</b> | <b>0.2341</b> |
| <b><i>TS1/THAs</i></b> | <b><i>AKs/AK-HSDHs</i></b>              | <b>-0.7343</b> | <b>0.0156</b> |
| <i>TS1/THAs</i>        | <i>AKs+AK-HSDHs</i>                     | -0.2239        | 0.5340        |
| <i>TS1/THAs</i>        | <i>AKs+AK-HSDHs+CGS1</i>                | -0.1471        | 0.6851        |
| <i>TS1/THAs</i>        | <i>AKs+AK-HSDHs+DHDPSs</i>              | -0.1941        | 0.5911        |
| <i>TS1/THAs</i>        | <i>AKs+AK-HSDHs+TS1</i>                 | 0.0510         | 0.8888        |
| <i>TS1/THAs</i>        | <i>AKs+AK-HSDHs+TS1+TD1</i>             | 0.0920         | 0.8003        |
| <i>TS1/THAs</i>        | <i>AKs+AK-HSDHs+TS1+THAs</i>            | 0.0424         | 0.9074        |
| <i>TS1/THAs</i>        | <i>AKs+DHDPSs</i>                       | -0.3838        | 0.2735        |
| <i>TS1/THAs</i>        | <i>BCAT1</i>                            | -0.3605        | 0.3062        |
| <i>TS1/THAs</i>        | Biosynthetic genes analyzed             | 0.1155         | 0.7508        |
| <b><i>TS1/THAs</i></b> | <b>Catabolic genes analyzed</b>         | <b>0.8527</b>  | <b>0.0017</b> |
| <i>TS1/THAs</i>        | <i>CGS1</i>                             | 0.2879         | 0.4198        |
| <b><i>TS1/THAs</i></b> | <b><i>CGS1/SAMSs</i></b>                | <b>-0.8705</b> | <b>0.0010</b> |
| <i>TS1/THAs</i>        | <i>DHDPS1</i>                           | 0.3619         | 0.3042        |
| <b><i>TS1/THAs</i></b> | <b><i>DHDPS2</i></b>                    | <b>0.6853</b>  | <b>0.0287</b> |
| <b><i>TS1/THAs</i></b> | <b><i>DHDPSs</i></b>                    | <b>0.7095</b>  | <b>0.0216</b> |
| <b><i>TS1/THAs</i></b> | <b><i>DHDPSs/LKR-SDHI</i></b>           | <b>0.7567</b>  | <b>0.0113</b> |
| <b><i>TS1/THAs</i></b> | <b><i>LKR-SDHI</i></b>                  | <b>-0.4012</b> | <b>0.2505</b> |
| <b><i>TS1/THAs</i></b> | <b><i>SAMS1</i></b>                     | <b>0.5403</b>  | <b>0.1069</b> |
| <b><i>TS1/THAs</i></b> | <b><i>SAMS2</i></b>                     | <b>0.4464</b>  | <b>0.1960</b> |
| <b><i>TS1/THAs</i></b> | <b><i>SAMS3</i></b>                     | <b>0.7083</b>  | <b>0.0219</b> |
| <b><i>TS1/THAs</i></b> | <b><i>SAMS4</i></b>                     | <b>0.7958</b>  | <b>0.0059</b> |
| <b><i>TS1/THAs</i></b> | <b><i>SAMSs</i></b>                     | <b>0.8530</b>  | <b>0.0017</b> |
| <b><i>TS1/THAs</i></b> | <b><i>TD1</i></b>                       | <b>0.6777</b>  | <b>0.0313</b> |
| <i>TS1/THAs</i>        | <i>THA1</i>                             | -0.2923        | 0.4125        |
| <b><i>TS1/THAs</i></b> | <b><i>THA2</i></b>                      | <b>-0.4954</b> | <b>0.1454</b> |
| <b><i>TS1/THAs</i></b> | <b><i>THAs</i></b>                      | <b>-0.5535</b> | <b>0.0970</b> |
| <b><i>TS1/THAs</i></b> | <b><i>THAs+TD1</i></b>                  | <b>0.5523</b>  | <b>0.0978</b> |
| <b><i>TS1/THAs</i></b> | <b><i>TS1</i></b>                       | <b>0.4809</b>  | <b>0.1594</b> |
| <i>TS1/THAs</i>        | <i>TS1/TD1</i>                          | -0.2150        | 0.5508        |

**Supplemental Table S6. Primers used in this study**

| Primer               | Sequence                                    | Use                                               |
|----------------------|---------------------------------------------|---------------------------------------------------|
| AK-HSDH2_5'L         | 5'-TGG TCC TAT TAT TTG CGC CTT C-3'         | Amplifying sequencing template                    |
| AK-HSDH2_5'R         | 5'-CGC CTT AAC GCT ATC TTC ACG-3'           | Amplifying sequencing template                    |
| AK-HSDH2_3'L         | 5'-TGC TTT GCT GTG CCT GAG AAG-3'           | Amplifying sequencing template                    |
| AK-HSDH2_3'R         | 5'-GTA TCT TCG AAG TTC AAC TGT TC-3'        | Amplifying sequencing template                    |
| SALK_082155LP        | 5'-TTG GAT GAG CAG CTT AGA ACC-3'           | Genotyping                                        |
| SALK_082155RP        | 5'-TGT TCC AAC ACA CAA TTC CAG-3'           | Genotyping                                        |
| Exon2_L              | 5'-CCG AAA GAA AAC TTG TGG TTG TC-3'        | Amplifying restriction enzyme digestion substrate |
| Exon4_R              | 5'-AGC ACC CAT AAT AGC TGC TG-3'            | Amplifying restriction enzyme digestion substrate |
| SALK_059678LP        | 5'-ACC CAA ATC AAA GAT ATT GCC-3'           | Genotyping                                        |
| SALK_059678RP        | 3'-TGA ATC GAA CAG AGT TTG ATG AG-3'        | Genotyping                                        |
| SALK_019023LP        | 5'-TGC TCC TTT TTA TTA AAT ATC AAA TCG-3'   | Genotyping                                        |
| SALK_019023RP        | 5'-AAA ACC CTT CTG TTT GTG CAG-3'           | Genotyping                                        |
| WiscDsLox461-464J6LP | 5'-AGCCGAGCTAGCTTATTTTGG-3'                 | Genotyping                                        |
| WiscDsLox461-464J6RP | 5'-TTG CCA AGT CTG GGT TGT ATC-3'           | Genotyping                                        |
| SALK_003685LP        | 5'-CTC CAA GCT CAT GAG CAG TTC-3'           | Genotyping                                        |
| SALK_003685RP        | 5'-TTG AAT CTG AAC CGT CCA TTC-3'           | Genotyping                                        |
| SALK_043533LP        | 5'-TGA GAT CGG GAT TAT CAC CAC-3'           | Genotyping                                        |
| SALK_043533RP        | 5'-TGA TCA AGC TCC TGT CAC ATG-3'           | Genotyping                                        |
| SALK_125957LP        | 5'-AGC TGT TCT AGA ATC GGG AGC-3'           | Genotyping                                        |
| SALK_125957RP        | 5'-TTC CAG TCC AGA ATC TTG TGC-3'           | Genotyping                                        |
| LBa1                 | 5'-TGG TTC ACG TAG TGG GCC ATC G-3'         | Genotyping                                        |
| p745                 | 5'-AAC GTC CGC AAT GTG TTA TTA AGT TGT C-3' | Genotyping                                        |
| AK1_L                | 5'-GAA CTG ATT CAA CAG GAG CTT-3'           | qRT-PCR                                           |
| AK1_R                | 5'-AAA GAA CAT GAA ACG CCC TC-3'            | qRT-PCR                                           |
| AK2_L                | 5'-CTA TCA GCA ATG GGA AAG AC-3'            | qRT-PCR                                           |
| AK2_R                | 5'-GAG CAG TTC TTA AAT GGA GTT C-3'         | qRT-PCR                                           |
| AK3_L                | 5'-ACT CCA TAT AAG GAC TGC TC-3'            | qRT-PCR                                           |
| AK3_R                | 5'-GCA TTC TCC AAA TGA AAC CA-3'            | qRT-PCR                                           |
| AK-HSDH1_L           | 5'-AGC AGG AGA AGT CTT GAG AT-3'            | qRT-PCR                                           |
| AK-HSDH1_R           | 5'-GTT TGG TTG TGA AAG CGA TG-3'            | qRT-PCR                                           |
| AK-HSDH2_L           | 5'-CTC GTA CCA GAA CCT CTA AA-3'            | qRT-PCR                                           |
| AK-HSDH2_R           | 5'-CAC CAC TCC AAC ATA TCT CA-3'            | qRT-PCR                                           |
| DHDPS1_L             | 5'-TGA TCT CCA TTG ATT CTG CC-3'            | qRT-PCR                                           |
| DHDPS1_R             | 5'-CAT AGG AAG ATG GAA GTT AGG T-3'         | qRT-PCR                                           |
| DHDPS2_L             | 5'-GGT TAT GGC TTG TGT TCT ATG-3'           | qRT-PCR                                           |
| DHDPS2_R             | 5'-GCA TTG GGA GAT GGA AAT TG-3'            | qRT-PCR                                           |
| CGS1_L               | 5'-CAA CAG AAT TCG ACC GCT TT-3'            | qRT-PCR                                           |
| CGS1_R               | 5'-AAA CTG ACC ACA CCT CCA AA-3'            | qRT-PCR                                           |
| TS1_L                | 5'-GTA TTG TAG AAG AAG CCA CAG-3'           | qRT-PCR                                           |
| TS1_R                | 5'-TTG ATT CCT CAG CTT GAA CA-3'            | qRT-PCR                                           |
| TD1_L                | 5'-GCA ACC TGT ATT CTC GTT TAA G-3'         | qRT-PCR                                           |
| TD1_R                | 5'-TAG CAG ATA AAG CAA CTC CT-3'            | qRT-PCR                                           |
| LKR-SDH_L            | 5'-AAC CAT TTC GTC ACA GCA AT-3'            | qRT-PCR                                           |
| LKR-SDH_R            | 5'-GAA ATA CCT TCA ACC GTC TCT T-3'         | qRT-PCR                                           |
| SAMS1_L              | 5'-GAG CCA TTG TCT GTC TTT GT-3'            | qRT-PCR                                           |
| SAMS1_R              | 5'-TCA AGA ACC TTC CGT TTC CT-3'            | qRT-PCR                                           |
| SAMS2_L              | 5'-TCA AAC CAA TCA TCC CAG AGA A-3'         | qRT-PCR                                           |
| SAMS2_R              | 5'-CCA TCC TCC GTA TGT GTC AA-3'            | qRT-PCR                                           |
| SAMS3_L              | 5'-CTG AGC CAT TGT CTG TGT TC-3'            | qRT-PCR                                           |
| SAMS3_R              | 5'-AAC CTA CCA TTA CCT CCT CTC-3'           | qRT-PCR                                           |
| SAMS4_L              | 5'-GCT ATG ATT CCG ATT AGA GTC C-3'         | qRT-PCR                                           |
| SAMS4_R              | 5'-AAG ATG GTG TTA TCG TCA AGG T-3'         | qRT-PCR                                           |
| THA1_L               | 5'-TCA AGA ATG AAG AAG ACG GG-3'            | qRT-PCR                                           |
| THA1_R               | 5'-TAT TCC ACG CTC AAA CAT CT-3'            | qRT-PCR                                           |
| THA2_L               | 5'-GAT TGG TGC TAT TGA AGC TG-3'            | qRT-PCR                                           |
| THA2_R               | 5'-CTT GGC TAA TTC TCC GAC TT-3'            | qRT-PCR                                           |
| BCAT1_L              | 5'-TGT ATC TCA GAC CGT TGT TG-3'            | qRT-PCR                                           |
| BCAT1_R              | 5'-GAA TCA CCT CCT CCA CAT AC-3'            | qRT-PCR                                           |
